# Supplementary material for: Impact of “Green Revolution” gene Rht-B1b on coleoptile length of wheat
Source: Front Plant Sci. 2023 Mar 2;14:1147019. doi: 10.3389/fpls.2023.1147019 (PMC10017974; doi:10.3389/fpls.2023.1147019)
Supplement: Supplementary file 1 [file Table_1.xlsx]

## Sheet: Sheet1
Table S1 Primers used in this study
Primer name	Squence of primer	PCR product length/bp	Usage
Rht1-cds-F	ATGAAGCGCGAGTACCAGGACG	1866	Rht-B1b-OE Gateway vector
Rht1-cds-R	TCACGGCGCGGCCAGGCG	1866	Rht-B1b-OE Gateway vector
Rht1-cds-gR	CGGCGCGGCCAGGCGCCAT	1863	Rht-B1b-OE Gateway vector without stop codon
attB-Rht1-cds-F	GGGGACAAGTTTGTACAAAAAAGCAGGCTCC-ATGAAGCGCGAGTACCAGGACG	1866	Rht-B1b-OE Gateway vector
attB-Rht1-cds-R	GGGGACCACTTTGTACAAGAAAGCTGGGTACCT-TCACGGCGCGGCCAGGCG	1866	Rht-B1b-OE Gateway vector
attB-Rht1-cds-gR	GGGGACCACTTTGTACAAGAAAGCTGGGTACCT-CGGCGCGGCCAGGCGCCAT	1863	Rht-B1b-OE Gateway vector without stop codon
Rht-B1b-1557-F	GCCCATCCGAAGTCTCATCT	651	Rht-B1b-OE Detection
Myc-R	CCGGGGATCCTCTAGAGATT	651	Rht-B1b-OE Detection
Ubi-F	GGACACCAACCAGCGAACCA	387	Rht-B1b-OE Detection
Ubi-R	GACGAGCGGCGTACCTTGAA	387	Rht-B1b-OE Detection
Rht-B1b-R1	GAGCTGCCGCCCTCCAGA	459	CRISPR Detection-Pst I
Rht-B1b-F1	CGCCCTTCTCCAGGCCCTG	459	CRISPR Detection-Pst I
