# Supplementary material for: Impact of “Green Revolution” gene Rht-B1b on coleoptile length of wheat
Source: Front Plant Sci. 2023 Mar 2;14:1147019. doi: 10.3389/fpls.2023.1147019 (PMC10017974; doi:10.3389/fpls.2023.1147019)
Supplement: Supplementary file 2 [file Table_2.xlsx]

## Sheet: Whole coleoptile
Table S2 The differentially expressed genes in whole coleoptile between Rht-B1b overexpression lines (Rht-B1b-OE) and transgenic null lines (TNL)
gene_ID of IWGSC RefSeq 2.1	Gene ID of IWGSC RefSeq 1.1	Rht-B1b-OE replicate 1	Rht-B1b-OE replicate 2	Rht-B1b-OE replicate 3	TNL replicate 1	TNL replicate 2	TNL replicate 3	Rht-B1b-OE mean	TNL mean	log2FoldChange	pvalue	padj	gene_chr	gene_description	tf_family
TraesCS1A03G0021200	TraesCS1A02G007900	30.7802	30.2493	61.4135	153.385	58.8576	204.138	40.8143	138.794	-1.7685	0.000216472	0.0217547	1A	PF11820:Protein of unknown function (DUF3339)	-
TraesCS1A03G0047100	TraesCS1A02G020900	2.56502	5.04155	3.02034	31.0916	10.3259	34.5307	3.5423	25.3161	-2.8489	0.000176713	0.0185513	1A	-	-
TraesCS1A03G0070500	TraesCS1A02G031100	1187.6	1532.63	2294.45	5881.5	2715.71	5908.82	1671.56	4835.34	-1.53258	6.51722e-06	0.00139409	1A	Q9FJ47.1 RecName: Full=Senescence-specific cysteine protease SAG12; AltName: Full=Cysteine proteinase SAG12; AltName: Full=Protein SENESCENCE-ASSOCIATED GENE 12; Flags: Precursor && PF00112:Papain family cysteine protease|PF08246:Cathepsin propeptide inhibitor domain (I29)	Peptidase_C1
TraesCS1A03G0119600	TraesCS1A02G049600	28.2152	30.2493	50.3389	102.602	57.825	176.716	36.2678	112.381	-1.63481	0.000313354	0.0291312	1A	Q8H8V7.1 RecName: Full=ABC transporter G family member 5; Short=ABC transporter ABCG.5; Short=OsABCG5; AltName: Full=Protein REDUCED CULM NUMBER 1; AltName: Full=White-brown complex homolog protein 5; Short=OsWBC5 && PF01061:ABC-2 type transporter|PF00005:ABC transporter	ABC2_membrane
TraesCS1A03G0123400	TraesCS1A02G050900	298.397	234.936	247.668	676.761	708.357	489.524	260.334	624.881	-1.26208	4.35964e-08	2.17145e-05	1A	P84964.1 RecName: Full=Defensin Tm-AMP-D1.2 && PF00304:Gamma-thionin family	-
TraesCS1A03G0141400	TraesCS1A02G058400	210.332	144.188	251.695	745.162	484.285	786.082	202.072	671.843	-1.73303	1.46651e-09	1.02113e-06	1A	P47927.1 RecName: Full=Floral homeotic protein APETALA 2 && PF00847:AP2 domain	AP2
TraesCS1A03G0217500	TraesCS1A02G089500	69.2555	22.1828	39.2644	158.567	113.585	269.137	43.5676	180.43	-2.04382	5.68836e-06	0.00125617	1A	Q9FR99.1 RecName: Full=1-aminocyclopropane-1-carboxylate oxidase; Short=ACC oxidase; AltName: Full=Ethylene-forming enzyme; Short=EFE && PF14226:non-haem dioxygenase in morphine synthesis N-terminal|PF03171:2OG-Fe(II) oxygenase superfamily	2OG-FeII_Oxy
TraesCS1A03G0554500	TraesCS1A02G209800	108.586	86.7146	106.719	387.609	546.24	197.028	100.673	376.959	-1.90401	1.08412e-07	4.60711e-05	1A	Q01595.1 RecName: Full=Cortical cell-delineating protein; AltName: Full=Root-specific protein ZRP3; Flags: Precursor && PF14547:Hydrophobic seed protein	-
TraesCS1A03G0559700	TraesCS1A02G212700	0	0	1.00678	24.8733	3.09777	35.5464	0.335593	21.1725	-5.95351	6.02812e-05	0.00809726	1A	Q8GZ38.1 RecName: Full=Transcription factor UNE10; AltName: Full=Basic helix-loop-helix protein 16; Short=AtbHLH16; Short=bHLH 16; AltName: Full=Protein UNFERTILIZED EMBRYO SAC 10; AltName: Full=Transcription factor EN 108; AltName: Full=bHLH transcription factor bHLH016 && PF00010:Helix-loop-helix DNA-binding domain	HLH
TraesCS1A03G0562000	TraesCS1A02G213700	20.5202	23.1911	27.183	3.10916	6.19554	1.01561	23.6314	3.4401	2.78175	0.000142661	0.0157603	1A	Q8W4K5.1 RecName: Full=VAN3-binding protein; AltName: Full=Protein FORKED 1 && PF08458:Plant pleckstrin homology-like region|PF05703:Auxin canalisation	-
TraesCS1A03G0577500	TraesCS1A02G220300	0	0	0	45.601	5.16295	67.0303	0	39.2648	-7.80621	6.57467e-08	3.07285e-05	1A	E5RQA1.1 RecName: Full=Transcription factor GHD7; AltName: Full=Protein GRAIN NUMBER PLANT HEIGHT AND HEADING DATE 7 && PF06203:CCT motif	CCT
TraesCS1A03G0672100	TraesCS1A02G263600	145.351	175.446	252.702	61.1468	36.1406	18.281	191.166	38.5228	2.31127	3.06792e-08	1.58086e-05	1A	Q0JH50.1 RecName: Full=Gibberellin 20 oxidase 2; AltName: Full=GA 20-oxidase 2; AltName: Full=Gibberellin C-20 oxidase 2; AltName: Full=Os20ox2; AltName: Full=Protein semidwarf-1 >P0C5H5.1 RecName: Full=Gibberellin 20 oxidase 2; AltName: Full=GA 20-oxidase 2; AltName: Full=Gibberellin C-20 oxidase 2; AltName: Full=Os20ox2; AltName: Full=Protein semidwarf-1 && PF03171:2OG-Fe(II) oxygenase superfam…	2OG-FeII_Oxy
TraesCS1A03G0691200	TraesCS1A02G273500	193.231	163.346	252.702	1027.06	516.295	1472.63	203.093	1005.33	-2.30768	1.15156e-10	1.13883e-07	1A	O48556.1 RecName: Full=Soluble inorganic pyrophosphatase; AltName: Full=Pyrophosphate phospho-hydrolase; Short=PPase && PF00719:Inorganic pyrophosphatase	Pyrophosphatase
TraesCS1A03G0761900	TraesCS1A02G306600	1.71001	0	0	264.279	1.03259	878.503	0.570004	381.271	-9.33911	0.000202016	0.0206671	1A	P07369.1 RecName: Full=Chlorophyll a-b binding protein 3C, chloroplastic; AltName: Full=LHCII type I CAB-3C; Short=LHCP; Flags: Precursor && PF00504:Chlorophyll A-B binding protein	-
TraesCS1A03G0829600	TraesCS1A02G335300	173.566	148.222	180.213	401.082	211.681	593.116	167.334	401.96	-1.26425	0.000312679	0.0291081	1A	Q6EPG8.1 RecName: Full=Acetylserotonin O-methyltransferase 1; Short=OsASMT1 && PF00891:O-methyltransferase|PF08100:Dimerisation domain	-
TraesCS1A03G0829700	TraesCS1A02G335400	52.1554	36.2991	30.2034	169.967	76.4116	219.372	39.5526	155.25	-1.96863	3.31979e-06	0.000796115	1A	P47917.1 RecName: Full=O-methyltransferase ZRP4; Short=OMT && PF00891:O-methyltransferase|PF08100:Dimerisation domain	-
TraesCS1A03G0838900	TraesCS1A02G339700	0.855006	1.00831	7.04745	41.4555	10.3259	54.843	2.97026	35.5414	-3.60686	4.29393e-05	0.00619461	1A	PF04720:PDDEXK-like family of unknown function	-
TraesCS1A03G0846400	TraesCS1A02G343300	31.6352	27.2244	34.2305	97.4204	105.324	88.3581	31.03	97.0342	-1.64409	1.61074e-07	6.39025e-05	1A	Q5W670.1 RecName: Full=Auxin-responsive protein IAA18; AltName: Full=Indoleacetic acid-induced protein 18 && PF02309:AUX/IAA family	-
TraesCS1A03G0923600	TraesCS1A02G382200	717.35	459.789	662.461	1252.99	1308.29	1748.88	613.2	1436.72	-1.22791	4.71681e-07	0.00016013	1A	Q9FJ45.1 RecName: Full=GDSL esterase/lipase At5g45910; AltName: Full=Extracellular lipase At5g45910; Flags: Precursor && PF00657:GDSL-like Lipase/Acylhydrolase	Lipase_GDSL
TraesCS1A03G0941200	TraesCS1A02G386500	11.1151	13.108	11.0746	1.03639	0	0	11.7659	0.345462	4.99666	0.000442763	0.0379558	1A	PF02485:Core-2/I-Branching enzyme	-
TraesCS1A03G0965000	TraesCS1A02G395800	0	1.00831	0	17.6186	2.06518	24.3746	0.336103	14.6861	-5.42583	0.000420794	0.0363465	1A	PF05078:Protein of unknown function (DUF679)	-
TraesCS1A03G1027700	TraesCS1A02G421200	9.40507	11.0914	19.1288	78.7654	60.9228	57.8898	13.2084	65.8593	-2.32766	8.70149e-08	3.88081e-05	1A	Q9M9Q6.1 RecName: Full=Serine carboxypeptidase-like 50; Flags: Precursor && PF00450:Serine carboxypeptidase	Peptidase_S10
TraesCS1A03G1038500	TraesCS1A02G426700	2.56502	1.00831	0	65.2924	8.26072	34.5307	1.19111	36.028	-4.85947	3.65783e-06	0.000869684	1A	Q9ZNX9.1 RecName: Full=RNA polymerase sigma factor sigE, chloroplastic/mitochondrial; Short=Sigma factor E; Short=Sigma-E; AltName: Full=RNA polymerase sigma factor sig5; Short=Atsig5; Short=Sigma factor 5; Flags: Precursor && PF04542:Sigma-70 region 2|PF04545:Sigma-70, region 4|PF04539:Sigma-70 region 3	Sigma70_r3
TraesCS1A03G1061300	TraesCS1A02G436900	0	0	1.00678	12.4366	9.29331	11.1717	0.335593	10.9672	-5.0041	0.000517563	0.0428084	1A	PF13976:GAG-pre-integrase domain|PF14244:gag-polypeptide of LTR copia-type	-
TraesCS1B03G0011000	TraesCS1B02G005100	285.572	196.62	265.79	127.476	105.324	63.9834	249.327	98.9277	1.33472	1.71564e-05	0.00301294	1B	-	-
TraesCS1B03G0026200	TraesCS1B02G013200	41.0403	126.039	330.224	10.3639	9.29331	14.2185	165.768	11.2919	3.87385	1.01605e-09	7.45505e-07	1B	A2WMH2.1 RecName: Full=Protein GOS9 >P0C5C6.1 RecName: Full=Protein GOS9 && PF01419:Jacalin-like lectin domain	-
TraesCS1B03G0031900	TraesCS1B02G015500	1.71001	1.00831	5.03389	26.9461	41.3036	38.5932	2.58407	35.6143	-3.8031	1.22515e-07	5.09761e-05	1B	-	-
TraesCS1B03G0032000	TraesCS1B02G015600	0	0	0	10.3639	12.3911	12.1873	0	11.6474	-6.05281	3.03601e-05	0.0046977	1B	-	-
TraesCS1B03G0032100	TraesCS1B02G015700	3.42003	6.04986	3.02034	39.3827	58.8576	29.4527	4.16341	42.5643	-3.36225	6.02589e-08	2.87544e-05	1B	-	-
TraesCS1B03G0034500	TraesCS1B02G016600	25.6502	50.4155	35.2373	144.058	145.595	136.092	37.101	141.915	-1.94297	1.45764e-09	1.02113e-06	1B	Q6EPG8.1 RecName: Full=Acetylserotonin O-methyltransferase 1; Short=OsASMT1 && PF00891:O-methyltransferase|PF08100:Dimerisation domain	-
TraesCS1B03G0077900	TraesCS1B02G038700	62.4155	50.4155	94.6372	217.641	216.844	251.871	69.1561	228.786	-1.72768	3.14733e-09	2.04538e-06	1B	Q9SZY4.1 RecName: Full=Protein NRT1/ PTR FAMILY 6.2; Short=AtNPF6.2; AltName: Full=Nitrate transporter 1.4 && PF00854:POT family	-
TraesCS1B03G0078300	TraesCS1B02G038900	2.56502	8.06648	8.05423	26.9461	22.717	38.5932	6.22858	29.4187	-2.26161	0.000272105	0.0260415	1B	Q9FJ47.1 RecName: Full=Senescence-specific cysteine protease SAG12; AltName: Full=Cysteine proteinase SAG12; AltName: Full=Protein SENESCENCE-ASSOCIATED GENE 12; Flags: Precursor && PF08246:Cathepsin propeptide inhibitor domain (I29)|PF00112:Papain family cysteine protease	Peptidase_C1
TraesCS1B03G0087800	TraesCS1B02G042800	176.986	143.18	213.437	863.31	1204	700.771	177.868	922.694	-2.37503	1.61217e-18	6.47114e-15	1B	-	-
TraesCS1B03G0139600	TraesCS1B02G059000	874.672	721.95	1066.18	1797.1	1914.42	1762.08	887.6	1824.53	-1.03958	2.76555e-07	0.000101207	1B	P07728.2 RecName: Full=Glutelin type-A 1; AltName: Full=Glutelin type I; Contains: RecName: Full=Glutelin type-A 1 acidic chain; Contains: RecName: Full=Glutelin type-A 1 basic chain; Flags: Precursor && PF00190:Cupin	-
TraesCS1B03G0164400	TraesCS1B02G066000	47.0254	43.3573	47.3186	95.3476	74.3465	161.482	45.9004	110.392	-1.26607	0.000538532	0.0440093	1B	Q8H8V7.1 RecName: Full=ABC transporter G family member 5; Short=ABC transporter ABCG.5; Short=OsABCG5; AltName: Full=Protein REDUCED CULM NUMBER 1; AltName: Full=White-brown complex homolog protein 5; Short=OsWBC5 && PF00005:ABC transporter|PF01061:ABC-2 type transporter	ABC2_membrane
TraesCS1B03G0192900	TraesCS1B02G076300	839.616	499.113	985.637	1890.37	1522.04	1804.74	774.789	1739.05	-1.16627	1.47048e-05	0.00266525	1B	Q9SK03.2 RecName: Full=-responsive transcription factor RAP2-7; AltName: Full=Protein RELATED TO APETALA2 7; AltName: Full=Protein TARGET OF EAT 1 && PF00847:AP2 domain	AP2
TraesCS1B03G0320200	TraesCS1B02G117400	100.036	39.3241	69.4677	241.478	161.084	262.027	69.6092	221.53	-1.66559	4.89322e-06	0.00111299	1B	Q9FR99.1 RecName: Full=1-aminocyclopropane-1-carboxylate oxidase; Short=ACC oxidase; AltName: Full=Ethylene-forming enzyme; Short=EFE && PF03171:2OG-Fe(II) oxygenase superfamily|PF14226:non-haem dioxygenase in morphine synthesis N-terminal	2OG-FeII_Oxy
TraesCS1B03G0512300	TraesCS1B02G173200	143.641	136.122	151.017	53.8921	78.4768	39.6088	143.593	57.3259	1.32528	2.45605e-05	0.00395268	1B	Q7XDB8.1 RecName: Full=Probable cytokinin riboside 5'-monophosphate phosphoribohydrolase LOGL10; AltName: Full=Protein LONELY GUY-like 10 && PF03641:Possible lysine decarboxylase	-
TraesCS1B03G0591000	TraesCS1B02G202400	11.9701	20.1662	14.0949	74.6199	39.2384	76.1708	15.4104	63.343	-2.04585	6.63686e-06	0.00141525	1B	Q42600.1 RecName: Full=Cytochrome P450 84A1; AltName: Full=Ferulate-5-hydroxylase; Short=F5H && PF00067:Cytochrome P450	p450
TraesCS1B03G0654800	TraesCS1B02G227100	32.4902	29.241	42.2847	99.4932	51.6295	126.951	34.672	92.6913	-1.41996	0.000502793	0.0418354	1B	Q9ZVJ5.2 RecName: Full=Haloacid dehalogenase-like hydrolase domain-containing protein Sgpp; AltName: Full=Subclass I phosphosugar phosphatase; Short=AtSgpp && PF13419:Haloacid dehalogenase-like hydrolase	-
TraesCS1B03G0669600	TraesCS1B02G233600	0	0	0	48.7102	6.19554	55.8586	0	36.9214	-7.71737	6.08384e-08	2.88294e-05	1B	E5RQA1.1 RecName: Full=Transcription factor GHD7; AltName: Full=Protein GRAIN NUMBER PLANT HEIGHT AND HEADING DATE 7 && PF06203:CCT motif	CCT
TraesCS1B03G0688300	TraesCS1B02G242300	77.8056	115.956	111.752	279.825	117.715	467.181	101.838	288.24	-1.50237	0.000519168	0.0428892	1B	Q6L482.1 RecName: Full=Probable protein phosphatase 2C 48; Short=OsPP2C48 && PF00481:Protein phosphatase 2C	PP2C
TraesCS1B03G0767600	TraesCS1B02G276200	124.831	183.512	99.6711	298.479	279.832	273.199	136.005	283.837	-1.06221	9.97213e-05	0.0120224	1B	-	-
TraesCS1B03G0788100	TraesCS1B02G283300	203.492	209.728	270.824	490.211	527.653	546.398	228.014	521.421	-1.19442	8.98853e-09	5.24231e-06	1B	Q93V56.1 RecName: Full=Soluble inorganic pyrophosphatase 1; AltName: Full=Pyrophosphate phospho-hydrolase 1; Short=PPase 1 && PF00719:Inorganic pyrophosphatase	Pyrophosphatase
TraesCS1B03G0896700	TraesCS1B02G326800	5.98504	4.03324	12.0813	677.797	42.3362	1313.18	7.36654	677.772	-6.52528	9.36093e-08	4.06855e-05	1B	P14895.1 RecName: Full=High molecular mass early light-inducible protein HV58, chloroplastic; Short=ELIP; Flags: Precursor && PF00504:Chlorophyll A-B binding protein	-
TraesCS1B03G0896900	TraesCS1B02G326900	17.9551	19.1579	79.5355	1425.03	124.943	1937.78	38.8829	1162.59	-4.90311	1.90867e-05	0.00329726	1B	P14895.1 RecName: Full=High molecular mass early light-inducible protein HV58, chloroplastic; Short=ELIP; Flags: Precursor && PF00504:Chlorophyll A-B binding protein	-
TraesCS1B03G0915800	TraesCS1B02G334100	46.1703	34.2825	80.5423	128.512	119.78	133.045	53.6651	127.112	-1.24607	0.000399493	0.0348151	1B	Q94AS9.2 RecName: Full=Cyclic nucleotide-gated ion channel 4; Short=AtCNGC4; AltName: Full=Cyclic nucleotide- and calmodulin-regulated ion channel 4; Short=AtHLM1 && PF00520:Ion transport protein|PF00027:Cyclic nucleotide-binding domain	Ion_trans
TraesCS1B03G0953200	TraesCS1B02G348000	4.27503	5.04155	2.01356	25.9097	8.26072	54.843	3.77671	29.6711	-2.9702	0.000271834	0.0260415	1B	P47917.1 RecName: Full=O-methyltransferase ZRP4; Short=OMT && PF00891:O-methyltransferase|PF08100:Dimerisation domain	-
TraesCS1B03G0953300	TraesCS1B02G348100	9.40507	7.05817	12.0813	176.186	25.8147	242.731	9.51486	148.244	-3.96196	1.82643e-09	1.23396e-06	1B	P47917.1 RecName: Full=O-methyltransferase ZRP4; Short=OMT && PF08100:Dimerisation domain|PF00891:O-methyltransferase	-
TraesCS1B03G0955700	TraesCS1B02G348900	0.855006	0	2.01356	30.0552	7.22813	27.4215	0.956188	21.5683	-4.50123	5.72672e-05	0.00776887	1B	A8QW53.1 RecName: Full=5-pentadecatrienyl resorcinol O-methyltransferase; AltName: Full=O-methyltransferase 3; Short=SbOMT3 && PF00891:O-methyltransferase	-
TraesCS1B03G1003000	TraesCS1B02G367500	1100.39	680.609	788.308	1605.36	1323.78	2332.86	856.437	1754	-1.03382	0.000207558	0.0210136	1B	Q6F357.1 RecName: Full=Phospholipase A1-II 7 >A2Y7R2.1 RecName: Full=Phospholipase A1-II 7 && PF01764:Lipase (class 3)	Lipase_3
TraesCS1B03G1038000	TraesCS1B02G381400	0	0	2.01356	64.256	17.554	11.1717	0.671186	30.9939	-5.59099	1.38835e-05	0.00253986	1B	P14928.1 RecName: Full=ABA-inducible protein PHV A1 && PF02987:Late embryogenesis abundant protein	-
TraesCS1B03G1053200	TraesCS1B02G388200	0.855006	0	2.01356	195.877	2.06518	311.792	0.956188	169.912	-7.47571	7.4743e-05	0.00960497	1B	P04784.1 RecName: Full=Chlorophyll a-b binding protein, chloroplastic; AltName: Full=LHCII type I CAB; Short=LHCP; Flags: Precursor && PF00504:Chlorophyll A-B binding protein	-
TraesCS1B03G1169100	TraesCS1B02G432700	7.69506	12.0997	24.1627	717.18	4.13036	2026.14	14.6525	915.818	-5.96705	0.000255967	0.024881	1B	P04784.1 RecName: Full=Chlorophyll a-b binding protein, chloroplastic; AltName: Full=LHCII type I CAB; Short=LHCP; Flags: Precursor && PF00504:Chlorophyll A-B binding protein	-
TraesCS1B03G1237600	TraesCS1B02G461600	10.2601	5.04155	10.0678	140.949	22.717	86.3269	8.45647	83.3308	-3.29521	2.85123e-07	0.000103489	1B	Q9ZNX9.1 RecName: Full=RNA polymerase sigma factor sigE, chloroplastic/mitochondrial; Short=Sigma factor E; Short=Sigma-E; AltName: Full=RNA polymerase sigma factor sig5; Short=Atsig5; Short=Sigma factor 5; Flags: Precursor && PF04545:Sigma-70, region 4|PF04539:Sigma-70 region 3|PF04542:Sigma-70 region 2	Sigma70_r3
TraesCS1B03G1244800	TraesCS1B02G465200	0.855006	0	0	8.2911	18.5866	11.1717	0.285002	12.6831	-5.21378	0.000284627	0.0270503	1B	-	-
TraesCS1B03G1284200	TraesCS1B02G481300	35.0553	18.1496	8.05423	46.6374	192.062	46.7181	20.4197	95.1391	-2.21188	0.000602271	0.0476671	1B	Q6EPG8.1 RecName: Full=Acetylserotonin O-methyltransferase 1; Short=OsASMT1 && PF08100:Dimerisation domain|PF00891:O-methyltransferase	-
TraesCS1D03G0021000	TraesCS1D02G009500	5.13004	9.07479	4.02712	49.7466	103.259	76.1708	6.07731	76.3921	-3.65925	5.20847e-12	7.56193e-09	1D	PF02458:Transferase family	-
TraesCS1D03G0021100	TraesCS1D02G009600	10.2601	14.1163	19.1288	293.298	237.496	294.527	14.5017	275.107	-4.2596	1.31144e-37	4.47443e-33	1D	PF02458:Transferase family	-
TraesCS1D03G0021200	TraesCS1D02G009700	13.6801	13.108	9.06101	136.803	161.084	111.717	11.9497	136.535	-3.5076	1.97254e-20	9.61428e-17	1D	Q6EPG8.1 RecName: Full=Acetylserotonin O-methyltransferase 1; Short=OsASMT1 && PF00891:O-methyltransferase|PF08100:Dimerisation domain	-
TraesCS1D03G0027100	TraesCS1D02G013000	37.6203	28.2327	29.1966	55.9649	102.226	86.3269	31.6832	81.5061	-1.35926	0.000245575	0.0240076	1D	Q69TI0.1 RecName: Full=Putative 12-oxophytodienoate reductase 5; AltName: Full=OPDA-reductase 5; Short=OsOPR5 && PF00724:NADH:flavin oxidoreductase / NADH oxidase family	Oxidored_FMN
TraesCS1D03G0042100	TraesCS1D02G022000	1285.93	1610.27	1388.35	3664.66	3733.84	2464.89	1428.18	3287.8	-1.20306	7.76335e-08	3.53165e-05	1D	P81713.1 RecName: Full=Bowman-Birk type trypsin inhibitor; Short=WTI && PF00228:Bowman-Birk serine protease inhibitor family	-
TraesCS1D03G0050900	TraesCS1D02G027200	0	0	1.00678	24.8733	1.03259	30.4683	0.335593	18.7914	-5.78128	0.000228866	0.0227077	1D	Q8GT21.1 RecName: Full=Benzyl alcohol O-benzoyltransferase; AltName: Full=Benzoyl coenzyme A:benzyl alcohol benzoyl transferase && PF02458:Transferase family	-
TraesCS1D03G0051100	TraesCS1D02G027400	447.168	303.501	267.803	1035.35	1841.11	535.227	339.491	1137.23	-1.74344	1.06002e-05	0.00202613	1D	P01053.2 RecName: Full=Subtilisin-chymotrypsin inhibitor-2A; Short=CI-2A && PF00280:Potato inhibitor I family	-
TraesCS1D03G0052800	TraesCS1D02G027900	2103.32	1738.33	1847.44	4198.4	6237.88	3589.17	1896.36	4675.15	-1.30167	9.07321e-08	4.02032e-05	1D	P01053.2 RecName: Full=Subtilisin-chymotrypsin inhibitor-2A; Short=CI-2A && PF00280:Potato inhibitor I family	-
TraesCS1D03G0052900	TraesCS1D02G028000	32.4902	49.4072	61.4135	223.86	129.074	120.858	47.7703	157.93	-1.72967	2.64758e-06	0.000666653	1D	P16063.1 RecName: Full=Subtilisin-chymotrypsin inhibitor CI-1B && PF00280:Potato inhibitor I family	-
TraesCS1D03G0060500	TraesCS1D02G031900	10.2601	16.133	12.0813	96.384	68.1509	86.3269	12.8248	83.6206	-2.71297	1.6049e-11	1.95559e-08	1D	Q339K6.1 RecName: Full=Laccase-15; AltName: Full=Benzenediol:oxygen oxidoreductase 15; AltName: Full=Diphenol oxidase 15; AltName: Full=Urishiol oxidase 15; Flags: Precursor && PF07731:Multicopper oxidase|PF00394:Multicopper oxidase|PF07732:Multicopper oxidase	-
TraesCS1D03G0061600	TraesCS1D02G032700	17.9551	19.1579	33.2237	122.294	41.3036	100.545	23.4456	88.0476	-1.91309	6.51062e-05	0.00857655	1D	Q9SZY4.1 RecName: Full=Protein NRT1/ PTR FAMILY 6.2; Short=AtNPF6.2; AltName: Full=Nitrate transporter 1.4 && PF00854:POT family	-
TraesCS1D03G0064400	TraesCS1D02G034300	135.946	91.7562	166.119	420.773	433.688	354.448	131.274	402.97	-1.61764	1.23278e-09	8.85488e-07	1D	Q9LUH2.1 RecName: Full=Protein DETOXIFICATION 19; Short=AtDTX19; AltName: Full=Multidrug and toxic compound extrusion protein 19; Short=MATE protein 19; AltName: Full=Protein ABERRANT LATERAL ROOT FORMATION 5 && PF01554:MatE	MatE
TraesCS1D03G0114000	TraesCS1D02G052000	125.686	99.8226	266.796	552.394	222.007	922.174	164.102	565.525	-1.78567	0.000204657	0.0208206	1D	Q8H8V7.1 RecName: Full=ABC transporter G family member 5; Short=ABC transporter ABCG.5; Short=OsABCG5; AltName: Full=Protein REDUCED CULM NUMBER 1; AltName: Full=White-brown complex homolog protein 5; Short=OsWBC5 && PF00005:ABC transporter|PF01061:ABC-2 type transporter	ABC2_membrane
TraesCS1D03G0129100	TraesCS1D02G059200	450.588	329.717	560.776	1602.25	1253.56	1131.39	447.027	1329.07	-1.57192	6.21974e-10	4.82291e-07	1D	Q9SK03.2 RecName: Full=Ethylene-responsive transcription factor RAP2-7; AltName: Full=Protein RELATED TO APETALA2 7; AltName: Full=Protein TARGET OF EAT 1 && PF00847:AP2 domain	AP2
TraesCS1D03G0131800	TraesCS1D02G060500	649.805	781.44	826.566	1437.47	1400.19	1929.66	752.603	1589.11	-1.0787	3.82767e-07	0.000133259	1D	B8AQW7.1 RecName: Full=Patatin-like protein 1 && PF01734:Patatin-like phospholipase	-
TraesCS1D03G0164800	TraesCS1D02G071800	328.322	366.016	627.223	210.387	185.866	140.154	440.521	178.802	1.30038	2.2865e-05	0.0037962	1D	Q39033.1 RecName: Full=Phosphoinositide phospholipase C 2; AltName: Full=Phosphoinositide phospholipase PLC2; Short=AtPLC2; Short=PI-PLC2 && PF00168:C2 domain|PF00388:Phosphatidylinositol-specific phospholipase C, X domain|PF00387:Phosphatidylinositol-specific phospholipase C, Y domain|PF09279:Phosphoinositide-specific phospholipase C, efhand-like	PI-PLC-X
TraesCS1D03G0204800	TraesCS1D02G088700	104.311	122.005	144.976	339.935	173.475	281.324	123.764	264.911	-1.09927	0.000309154	0.0288587	1D	PF12056:Protein of unknown function (DUF3537)	-
TraesCS1D03G0212100	TraesCS1D02G090800	0.855006	1.00831	0	23.8369	4.13036	24.3746	0.621105	17.4473	-4.79	0.000292935	0.027724	1D	P0C8Z7.1 RecName: Full=GDSL esterase/lipase At1g28640; AltName: Full=Extracellular lipase At1g28640; Flags: Precursor && PF00657:GDSL-like Lipase/Acylhydrolase	Lipase_GDSL
TraesCS1D03G0230600	TraesCS1D02G098000	119.701	32.2659	112.759	405.227	240.593	381.869	88.242	342.563	-1.95462	4.67866e-06	0.00107494	1D	Q9FR99.1 RecName: Full=1-aminocyclopropane-1-carboxylate oxidase; Short=ACC oxidase; AltName: Full=Ethylene-forming enzyme; Short=EFE && PF14226:non-haem dioxygenase in morphine synthesis N-terminal|PF03171:2OG-Fe(II) oxygenase superfamily	2OG-FeII_Oxy
TraesCS1D03G0250400	TraesCS1D02G105600	106.876	176.454	200.349	81.8746	69.1835	67.0303	161.226	72.6961	1.14702	0.00028441	0.0270503	1D	Q0DKM0.1 RecName: Full=Probable ethylene response sensor 2; Short=OsERS2; AltName: Full=Ethylene response factor 2 && PF02518:Histidine kinase-, DNA gyrase B-, and HSP90-like ATPase|PF01590:GAF domain|PF00512:His Kinase A (phospho-acceptor) domain	HATPase_c
TraesCS1D03G0446600	TraesCS1D02G173100	14.5351	4.03324	24.1627	110.893	75.3791	76.1708	14.2437	87.4811	-2.61787	2.3444e-07	8.93715e-05	1D	Q7XD66.1 RecName: Full=Putative ripening-related protein 6; Flags: Precursor && -	-
TraesCS1D03G0485600	TraesCS1D02G189700	93.1957	71.59	64.4339	255.988	113.585	164.529	76.4065	178.034	-1.21799	0.000515618	0.0426993	1D	Q06398.2 RecName: Full=Probable glutathione S-transferase GSTU6; AltName: Full=28 kDa cold-induced protein && PF14497:Glutathione S-transferase, C-terminal domain|PF13417:Glutathione S-transferase, N-terminal domain	-
TraesCS1D03G0534300	TraesCS1D02G213203	63.2705	46.3822	78.5288	406.264	428.525	342.261	62.7272	392.35	-2.64468	1.00842e-23	6.88118e-20	1D	Q01595.1 RecName: Full=Cortical cell-delineating protein; AltName: Full=Root-specific protein ZRP3; Flags: Precursor && PF14547:Hydrophobic seed protein	-
TraesCS1D03G0534700	TraesCS1D02G213400	82.0806	29.241	28.1898	422.846	851.887	100.545	46.5038	458.426	-3.2993	0.000336386	0.0307694	1D	Q01595.1 RecName: Full=Cortical cell-delineating protein; AltName: Full=Root-specific protein ZRP3; Flags: Precursor && PF14547:Hydrophobic seed protein	-
TraesCS1D03G0538800	TraesCS1D02G215600	0	0	0	21.7641	2.06518	61.9522	0	28.5938	-7.34887	2.17805e-06	0.000567265	1D	Q8GZ38.1 RecName: Full=Transcription factor UNE10; AltName: Full=Basic helix-loop-helix protein 16; Short=AtbHLH16; Short=bHLH 16; AltName: Full=Protein UNFERTILIZED EMBRYO SAC 10; AltName: Full=Transcription factor EN 108; AltName: Full=bHLH transcription factor bHLH016 && PF00010:Helix-loop-helix DNA-binding domain	HLH
TraesCS1D03G0544300	TraesCS1D02G218000	123.121	109.906	184.241	322.316	247.822	302.652	139.089	290.93	-1.06576	8.63021e-05	0.0107073	1D	O23553.3 RecName: Full=Beta-amylase 3, chloroplastic; AltName: Full=1,4-alpha-D-glucan maltohydrolase; AltName: Full=Beta-amylase 8; AltName: Full=Chloroplast beta-amylase; Short=CT-BMY; Flags: Precursor && PF01373:Glycosyl hydrolase family 14	-
TraesCS1D03G0550600	TraesCS1D02G221800	0	0	0	87.0565	4.13036	56.8742	0	49.3537	-8.13584	8.19942e-05	0.0103107	1D	E5RQA1.1 RecName: Full=Transcription factor GHD7; AltName: Full=Protein GRAIN NUMBER PLANT HEIGHT AND HEADING DATE 7 && PF06203:CCT motif	CCT
TraesCS1D03G0591200	TraesCS1D02G243500	14.5351	15.1246	23.1559	102.602	24.7822	103.592	17.6052	76.9922	-2.13188	0.000115227	0.0133947	1D	Q941F1.2 RecName: Full=Phospholipase A1-Igamma1, chloroplastic; Flags: Precursor && PF01764:Lipase (class 3)	Lipase_3
TraesCS1D03G0600000	TraesCS1D02G247700	67.5455	72.5983	90.6101	412.482	142.497	329.058	76.918	294.679	-1.93883	3.37467e-07	0.0001187	1D	-	-
TraesCS1D03G0635700	TraesCS1D02G263700	47.0254	66.5484	85.5762	33.1644	12.3911	10.1561	66.3833	18.5705	1.8372	0.000296441	0.0279396	1D	Q0JH50.1 RecName: Full=Gibberellin 20 oxidase 2; AltName: Full=GA 20-oxidase 2; AltName: Full=Gibberellin C-20 oxidase 2; AltName: Full=Os20ox2; AltName: Full=Protein semidwarf-1 >P0C5H5.1 RecName: Full=Gibberellin 20 oxidase 2; AltName: Full=GA 20-oxidase 2; AltName: Full=Gibberellin C-20 oxidase 2; AltName: Full=Os20ox2; AltName: Full=Protein semidwarf-1 && PF14226:non-haem dioxygenase in morph…	2OG-FeII_Oxy
TraesCS1D03G0655000	TraesCS1D02G273500	135.946	108.897	171.152	510.939	545.207	498.665	138.665	518.27	-1.90231	1.75757e-16	6.66285e-13	1D	O48556.1 RecName: Full=Soluble inorganic pyrophosphatase; AltName: Full=Pyrophosphate phospho-hydrolase; Short=PPase && PF00719:Inorganic pyrophosphatase	Pyrophosphatase
TraesCS1D03G0666100	TraesCS1D02G277100	80.3706	84.698	90.6101	43.5283	44.4014	30.4683	85.2262	39.466	1.11059	0.000500889	0.0417328	1D	Q8LK56.2 RecName: Full=Transcriptional activator DEMETER; AltName: Full=DNA glycosylase-related protein DME && PF15628:RRM in Demeter	-
TraesCS1D03G0691900	TraesCS1D02G288700	16.2451	43.3573	40.2712	8.2911	5.16295	8.12488	33.2912	7.19298	2.20485	0.000338027	0.0308368	1D	-	-
TraesCS1D03G0729600	TraesCS1D02G306200	6.84005	4.03324	5.03389	237.333	6.19554	858.191	5.30239	367.24	-6.1115	3.27685e-05	0.00492517	1D	P07369.1 RecName: Full=Chlorophyll a-b binding protein 3C, chloroplastic; AltName: Full=LHCII type I CAB-3C; Short=LHCP; Flags: Precursor && PF00504:Chlorophyll A-B binding protein	-
TraesCS1D03G0748400	TraesCS1D02G315000	0	0	1.00678	120.221	6.19554	176.716	0.335593	101.044	-8.20785	1.48761e-05	0.00268545	1D	P14895.1 RecName: Full=High molecular mass early light-inducible protein HV58, chloroplastic; Short=ELIP; Flags: Precursor && PF00504:Chlorophyll A-B binding protein	-
TraesCS1D03G0748600	TraesCS1D02G315100	0	0	0	107.784	9.29331	198.044	0	105.041	-9.22559	7.3451e-06	0.00152807	1D	P14895.1 RecName: Full=High molecular mass early light-inducible protein HV58, chloroplastic; Short=ELIP; Flags: Precursor && PF00504:Chlorophyll A-B binding protein	-
TraesCS1D03G0748700	TraesCS1D02G315200	0	0	7.04745	486.066	35.1081	677.412	2.34915	399.529	-7.41963	0.000305456	0.0285918	1D	P14895.1 RecName: Full=High molecular mass early light-inducible protein HV58, chloroplastic; Short=ELIP; Flags: Precursor && PF00504:Chlorophyll A-B binding protein	-
TraesCS1D03G0797700	TraesCS1D02G337500	28.2152	43.3573	76.5152	1008.4	105.324	973.97	49.3626	695.9	-3.81838	4.62692e-05	0.00653679	1D	P47917.1 RecName: Full=O-methyltransferase ZRP4; Short=OMT && PF08100:Dimerisation domain|PF00891:O-methyltransferase	-
TraesCS1D03G0861700	TraesCS1D02G368900	81.2256	102.848	168.132	388.645	171.41	288.433	117.402	282.829	-1.27035	0.000625072	0.0490829	1D	B7KWT4.1 RecName: Full=Putative aminoacrylate hydrolase RutD; AltName: Full=Aminohydrolase && PF00561:alpha/beta hydrolase fold	Abhydrolase_1
TraesCS1D03G0862300	TraesCS1D02G369300	0.855006	3.02493	44.2983	1802.28	355.211	1829.11	16.0594	1328.87	-6.37328	1.71032e-05	0.00301294	1D	P14928.1 RecName: Full=ABA-inducible protein PHV A1 && PF02987:Late embryogenesis abundant protein	-
TraesCS1D03G0873500	TraesCS1D02G374900	0.855006	1.00831	0	171.004	2.06518	720.068	0.621105	297.712	-8.89358	2.04251e-05	0.0034748	1D	P07369.1 RecName: Full=Chlorophyll a-b binding protein 3C, chloroplastic; AltName: Full=LHCII type I CAB-3C; Short=LHCP; Flags: Precursor && PF00504:Chlorophyll A-B binding protein	-
TraesCS1D03G0873600	TraesCS1D02G375000	0.855006	0	2.01356	204.168	6.19554	461.087	0.956188	223.817	-7.87353	8.70881e-06	0.00173263	1D	P04784.1 RecName: Full=Chlorophyll a-b binding protein, chloroplastic; AltName: Full=LHCII type I CAB; Short=LHCP; Flags: Precursor && PF00504:Chlorophyll A-B binding protein	-
TraesCS1D03G0873700	TraesCS1D02G375100	0	0	0	150.276	2.06518	361.557	0	171.3	-9.93111	0.000170869	0.018105	1D	P07369.1 RecName: Full=Chlorophyll a-b binding protein 3C, chloroplastic; AltName: Full=LHCII type I CAB-3C; Short=LHCP; Flags: Precursor && PF00504:Chlorophyll A-B binding protein	-
TraesCS1D03G0925300	TraesCS1D02G397900	0.855006	1.00831	2.01356	22.8005	2.06518	34.5307	1.29229	19.7988	-3.95324	0.00056893	0.0459111	1D	-	-
TraesCS2A03G0020600	TraesCS2A02G009500	277.877	194.604	285.925	616.65	528.686	485.462	252.802	543.599	-1.10374	2.06601e-06	0.000544317	2A	D3UAG6.1 RecName: Full=UDP-glycosyltransferase 88F5; AltName: Full=UDP-glucose:chalcone 2'-O-glucosyltransferase && PF00201:UDP-glucoronosyl and UDP-glucosyl transferase	UDPGT
TraesCS2A03G0050700	TraesCS2A02G024500	0	0	0	21.7641	6.19554	22.3434	0	16.7677	-6.57863	5.38802e-06	0.00120545	2A	D9J0Z7.1 RecName: Full=Anthranilate O-methyltransferase 1; AltName: Full=Anthranilic acid methyltransferase 1; AltName: Full=O-methyltransferase 1 && PF03492:SAM dependent carboxyl methyltransferase	-
TraesCS2A03G0051300	TraesCS2A02G025000	10.2601	8.06648	19.1288	51.8194	32.0103	64.9991	12.4851	49.6096	-1.99558	9.0328e-05	0.0111088	2A	Q9URY4.1 RecName: Full=Putative amidase C869.01; Flags: Precursor && PF01425:Amidase	Amidase
TraesCS2A03G0052400	TraesCS2A02G025700	3.42003	6.04986	8.05423	129.548	9.29331	206.169	5.84137	115.004	-4.30903	1.02641e-07	4.40499e-05	2A	P53415.1 RecName: Full=Chalcone synthase 2; AltName: Full=Naringenin-chalcone synthase 2 && PF02797:Chalcone and stilbene synthases, C-terminal domain|PF00195:Chalcone and stilbene synthases, N-terminal domain	Chal_sti_synt_N
TraesCS2A03G0068700	TraesCS2A02G035300	1.71001	2.01662	3.02034	96.384	3.09777	206.169	2.24899	101.884	-5.5063	0.000106982	0.0126518	2A	P53415.1 RecName: Full=Chalcone synthase 2; AltName: Full=Naringenin-chalcone synthase 2 && PF02797:Chalcone and stilbene synthases, C-terminal domain|PF00195:Chalcone and stilbene synthases, N-terminal domain	Chal_sti_synt_N
TraesCS2A03G0073200	TraesCS2A02G038000	50.4454	74.6149	102.691	443.574	184.834	604.288	75.9172	410.898	-2.4388	6.8926e-09	4.27573e-06	2A	PF06966:Protein of unknown function (DUF1295)	-
TraesCS2A03G0089300	TraesCS2A02G047500	9.40507	69.5734	64.4339	348.226	279.832	546.398	47.8041	391.485	-3.03975	8.45521e-09	4.97378e-06	2A	A3BNA1.1 RecName: Full=Flowering-promoting factor 1-like protein 5; AltName: Full=FPF1-like protein 5 && -	-
TraesCS2A03G0099700	TraesCS2A02G051700	2186.25	2446.16	2317.61	5988.24	7261.17	6724.36	2316.67	6657.92	-1.52311	2.33473e-20	1.0621e-16	2A	Q84TC2.1 RecName: Full=DIBOA-glucoside dioxygenase BX6; AltName: Full=2,4-dihydroxy-1,4-benzoxazin-3-one-glucoside dioxygenase; AltName: Full=2-oxoglutarate-dependent dioxygenase BX6; AltName: Full=Protein BENZOXAZINONE SYNTHESIS 6 && PF03171:2OG-Fe(II) oxygenase superfamily|PF14226:non-haem dioxygenase in morphine synthesis N-terminal	2OG-FeII_Oxy
TraesCS2A03G0099800	TraesCS2A02G051600	261.632	292.41	236.593	639.451	668.086	902.878	263.545	736.805	-1.48338	2.83672e-11	3.17327e-08	2A	Q38J50.1 RecName: Full=Tricetin 3',4',5'-O-trimethyltransferase; Short=TaOMT2; AltName: Full=Caffeic acid 3-O-methyltransferase; Short=TaCM; AltName: Full=Flavone O-methyltransferase 2 && PF08100:Dimerisation domain|PF00891:O-methyltransferase	-
TraesCS2A03G0109800	TraesCS2A02G056700	82.0806	84.698	123.834	153.385	247.822	255.934	96.8708	219.047	-1.17889	0.000116242	0.0134898	2A	Q9M1V2.1 RecName: Full=Cytosolic sulfotransferase 5; Short=AtSOT5; AltName: Full=Flavonoid 7-sulfotransferase 3a; Short=AtST3a && PF00685:Sulfotransferase domain	Sulfotransfer_1
TraesCS2A03G0147100	TraesCS2A02G075500	26.5052	31.2576	56.3796	254.951	151.791	376.791	38.0475	261.178	-2.7838	8.14938e-12	1.09037e-08	2A	Q6Z1I5.1 RecName: Full=Acyl-[acyl-carrier-protein] desaturase 7, chloroplastic; Flags: Precursor >A2YS76.1 RecName: Full=Acyl-[acyl-carrier-protein] desaturase 7, chloroplastic; Flags: Precursor && PF03405:Fatty acid desaturase	-
TraesCS2A03G0273300	TraesCS2A02G133700	182.971	189.562	259.749	415.591	370.7	538.273	210.761	441.521	-1.06796	2.03659e-05	0.00347427	2A	P52711.1 RecName: Full=Serine carboxypeptidase II-3; AltName: Full=CP-MII.3; Contains: RecName: Full=Serine carboxypeptidase II-3 chain A; Contains: RecName: Full=Serine carboxypeptidase II-3 chain B; Flags: Precursor && PF00450:Serine carboxypeptidase	Peptidase_S10
TraesCS2A03G0290300	TraesCS2A02G141900	524.119	449.706	542.654	773.145	814.713	1490.92	505.493	1026.26	-1.02161	0.000336155	0.0307694	2A	Q84MC0.1 RecName: Full=Uncharacterized GPI-anchored protein At3g06035; Flags: Precursor && -	-
TraesCS2A03G0365400	TraesCS2A02G175400	165.871	170.404	185.247	90.1657	80.542	60.9366	173.841	77.2148	1.17089	7.50379e-06	0.00155634	2A	Q6Z4H0.1 RecName: Full=Probable 6-phosphogluconolactonase 2; Short=6PGL 2 >A2YNH4.1 RecName: Full=Probable 6-phosphogluconolactonase 2; Short=6PGL 2 && PF01182:Glucosamine-6-phosphate isomerases/6-phosphogluconolactonase	-
TraesCS2A03G0412800	TraesCS2A02G198000	449.733	357.95	564.803	1127.59	701.129	964.83	457.495	931.182	-1.02535	8.43613e-05	0.0105047	2A	P80728.1 RecName: Full=Mavicyanin && PF02298:Plastocyanin-like domain	Cu_bind_like
TraesCS2A03G0430600	TraesCS2A02G204900	145.351	129.064	353.379	733.762	413.036	768.817	209.265	638.538	-1.61038	5.02859e-05	0.00698851	2A	O64515.1 RecName: Full=Organic cation/carnitine transporter 2; Short=AtOCT2 && PF00083:Sugar (and other) transporter	Sugar_tr
TraesCS2A03G0452800	TraesCS2A02G212200	32.4902	33.2742	28.1898	6.21832	6.19554	5.07805	31.3181	5.83064	2.42648	1.86137e-05	0.00323191	2A	B9FXT3.2 RecName: Full=Transcription factor UDT1; AltName: Full=Basic helix-loop-helix protein 164; Short=OsbHLH164; AltName: Full=Protein UNDEVELOPED TAPETUM 1 && PF00010:Helix-loop-helix DNA-binding domain	HLH
TraesCS2A03G0678600	TraesCS2A02G274000	174.421	142.172	137.929	79.8018	44.4014	62.9678	151.507	62.3903	1.28128	2.47637e-05	0.003976	2A	P37890.1 RecName: Full=Serine carboxypeptidase 1; AltName: Full=Carboxypeptidase C; AltName: Full=Serine carboxypeptidase I; Contains: RecName: Full=Serine carboxypeptidase 1 chain A; AltName: Full=Serine carboxypeptidase I chain A; Contains: RecName: Full=Serine carboxypeptidase 1 chain B; AltName: Full=Serine carboxypeptidase I chain B; Flags: Precursor && PF00450:Serine carboxypeptidase	Peptidase_S10
TraesCS2A03G0735100	TraesCS2A02G294600	0	2.01662	3.02034	57.0013	14.4563	87.3425	1.67899	52.9333	-5.03167	5.1457e-08	2.50805e-05	2A	-	-
TraesCS2A03G0775300	TraesCS2A02G312000	90.6307	164.354	154.037	25.9097	42.3362	4.06244	136.341	24.1028	2.50025	1.02815e-05	0.00198747	2A	-	-
TraesCS2A03G0807300	TraesCS2A02G338800	8.55006	6.04986	6.04067	53.8921	32.0103	29.4527	6.8802	38.4517	-2.47264	8.35683e-06	0.00168253	2A	F4ILY9.1 RecName: Full=Amino acid transporter ANTL1; AltName: Full=Aromatic and neutral amino acid transporter-like protein 1 && PF01490:Transmembrane amino acid transporter protein	Aa_trans
TraesCS2A03G0807800	TraesCS2A02G338600	58.9954	49.4072	48.3254	120.221	112.552	99.5298	52.2427	110.768	-1.08111	0.000130163	0.0147052	2A	Q6DIV6.1 RecName: Full=Vesicular inhibitory amino acid transporter; AltName: Full=GABA and glycine transporter; AltName: Full=Solute carrier family 32 member 1; AltName: Full=Vesicular GABA transporter && PF01490:Transmembrane amino acid transporter protein	Aa_trans
TraesCS2A03G0857500	TraesCS2A02G350700	321.482	347.867	321.162	115.039	216.844	114.764	330.171	148.882	1.14909	9.61831e-05	0.0116856	2A	O04138.2 RecName: Full=Chitinase 4; AltName: Full=OsChia2b; AltName: Full=Pathogenesis related (PR)-3 chitinase 4; Flags: Precursor && PF00182:Chitinase class I|PF00187:Chitin recognition protein	-
TraesCS2A03G0918900	TraesCS2A02G379000	0	0	0	20.7277	1.03259	15.2342	0	12.3315	-6.13511	0.000204809	0.0208206	2A	O49561.2 RecName: Full=Gibberellin 2-beta-dioxygenase 8; AltName: Full=GA 2-oxidase 8; AltName: Full=Gibberellin 2-beta-hydroxylase 8; AltName: Full=Gibberellin 2-oxidase 8 && PF03171:2OG-Fe(II) oxygenase superfamily|PF14226:non-haem dioxygenase in morphine synthesis N-terminal	2OG-FeII_Oxy
TraesCS2A03G0920900	TraesCS2A02G379900	63.2705	53.4404	104.705	380.354	143.53	470.228	73.8053	331.371	-2.16774	4.3396e-07	0.000148061	2A	Q7XUA6.1 RecName: Full=Probable aquaporin PIP2-3; AltName: Full=OsPIP2;3; AltName: Full=Plasma membrane intrinsic protein 2-3 && PF00230:Major intrinsic protein	-
TraesCS2A03G1026300	TraesCS2A02G430800	0	2.01662	0	18.655	1.03259	57.8898	0.672206	25.8591	-5.31877	0.000320843	0.0297061	2A	PF14368:Probable lipid transfer	-
TraesCS2A03G1086400	TraesCS2A02G460700	6.84005	13.108	13.0881	42.4919	51.6295	29.4527	11.0121	41.1914	-1.91502	0.000148423	0.0161788	2A	Q53QI0.1 RecName: Full=B3 domain-containing protein Os11g0156000 && PF02362:B3 DNA binding domain	B3
TraesCS2A03G1087300	TraesCS2A02G461200	47.0254	110.914	39.2644	24.8733	12.3911	6.09366	65.7346	14.4527	2.18535	0.000203388	0.0207452	2A	-	-
TraesCS2A03G1195300	TraesCS2A02G513900	64.9805	77.6398	72.4881	37.3099	26.8473	27.4215	71.7028	30.5262	1.2311	0.000331639	0.0304987	2A	-	-
TraesCS2A03G1212400	TraesCS2A02G522100	15.3901	10.0831	12.0813	58.0377	60.9228	62.9678	12.5182	60.6428	-2.26738	4.02159e-08	2.0178e-05	2A	-	-
TraesCS2A03G1334100	TraesCS2A02G573900	7.69506	10.0831	13.0881	42.4919	46.4665	86.3269	10.2888	58.4284	-2.51458	4.95335e-07	0.000165687	2A	Q01548.1 RecName: Full=Peroxidase 2 && PF00141:Peroxidase	-
TraesCS2B03G0080200	TraesCS2B02G038600	0.855006	0	1.00678	16.5822	1.03259	84.2957	0.620595	33.9701	-5.75478	8.43242e-05	0.0105047	2B	P53415.1 RecName: Full=Chalcone synthase 2; AltName: Full=Naringenin-chalcone synthase 2 && PF00195:Chalcone and stilbene synthases, N-terminal domain|PF02797:Chalcone and stilbene synthases, C-terminal domain	Chal_sti_synt_N
TraesCS2B03G0102700	TraesCS2B02G049100	22.2302	26.216	46.3118	169.967	159.019	82.2644	31.586	137.084	-2.12268	2.2167e-07	8.5458e-05	2B	Q9SND9.1 RecName: Full=Uncharacterized acetyltransferase At3g50280 && PF02458:Transferase family	-
TraesCS2B03G0108400	TraesCS2B02G051600	30.7802	29.241	49.3322	117.112	53.6947	197.028	36.4511	122.612	-1.75216	0.00021033	0.0212626	2B	Q7XSK2.2 RecName: Full=Beta-glucosidase 16; Short=Os4bglu16; Flags: Precursor && PF00232:Glycosyl hydrolase family 1	Glyco_hydro_1
TraesCS2B03G0124700	TraesCS2B02G059500	91.4857	111.922	114.773	439.428	247.822	483.43	106.06	390.227	-1.88091	3.50516e-10	2.98977e-07	2B	A3BNA1.1 RecName: Full=Flowering-promoting factor 1-like protein 5; AltName: Full=FPF1-like protein 5 && -	-
TraesCS2B03G0152700	TraesCS2B02G069300	22.2302	16.133	32.2169	4.14555	3.09777	3.04683	23.5267	3.43005	2.77808	0.000110908	0.0130073	2B	Q7XBQ9.1 RecName: Full=Disease resistance protein RGA2; AltName: Full=Blight resistance protein RPI; AltName: Full=RGA2-blb && PF00931:NB-ARC domain	NB-ARC
TraesCS2B03G0213800	TraesCS2B02G093100	0	0	2.01356	54.9285	3.09777	35.5464	0.671186	31.1909	-5.59603	3.84396e-05	0.00565302	2B	A6YIH8.1 RecName: Full=Premnaspirodiene oxygenase; Short=HPO; AltName: Full=Cytochrome P450 71D55 && PF00067:Cytochrome P450	p450
TraesCS2B03G0234400	TraesCS2B02G100800	2.56502	2.01662	1.00678	7.25471	69.1835	54.843	1.86281	43.7604	-4.53711	1.1581e-06	0.000342231	2B	Q0JMY8.1 RecName: Full=Salt stress-induced protein; Short=Salt protein; AltName: Full=Protein lectin-like; AltName: Full=Protein mannose-binding lectin && PF03018:Dirigent-like protein|PF01419:Jacalin-like lectin domain	-
TraesCS2B03G0278300	TraesCS2B02G115500	0	0	2.01356	26.9461	8.26072	28.4371	0.671186	21.2146	-5.04655	6.60631e-05	0.00868584	2B	Q9ZT50.1 RecName: Full=E3 ubiquitin-protein ligase RHA2A; AltName: Full=RING-H2 finger A2a; AltName: Full=RING-H2 zinc finger protein RHA2a && PF13639:Ring finger domain	-
TraesCS2B03G0350800	TraesCS2B02G145100	10.2601	11.0914	10.0678	117.112	14.4563	72.1083	10.4731	67.8921	-2.69693	4.18146e-05	0.00605797	2B	Q7FAE1.1 RecName: Full=Momilactone A synthase; Short=OsMAS && PF00106:short chain dehydrogenase	adh_short
TraesCS2B03G0351300	TraesCS2B02G145500	226.577	142.172	149.003	350.299	365.537	348.354	172.584	354.73	-1.03652	3.21278e-05	0.00487299	2B	Q9FKU8.1 RecName: Full=Berberine bridge enzyme-like 26; Short=AtBBE-like 26; Flags: Precursor && PF01565:FAD binding domain|PF08031:Berberine and berberine like	FAD_binding_4
TraesCS2B03G0417600	TraesCS2B02G170800	27.3602	33.2742	104.705	316.098	114.617	227.497	55.1131	219.404	-1.9965	0.000102698	0.0122944	2B	Q3ZFI4.1 RecName: Full=Sinapine esterase; Short=BnSCE3; AltName: Full=Lipase 2; Short=BnLIP2; Flags: Precursor && PF00657:GDSL-like Lipase/Acylhydrolase	Lipase_GDSL
TraesCS2B03G0442900	TraesCS2B02G182900	15.3901	10.0831	18.122	127.476	71.2487	93.4361	14.5317	97.3868	-2.74232	3.51774e-11	3.87162e-08	2B	P42813.1 RecName: Full=Ribonuclease 1; Flags: Precursor && PF00445:Ribonuclease T2 family	Ribonuclease_T2
TraesCS2B03G0457500	TraesCS2B02G189800	73.5305	52.4321	80.5423	231.114	94.9983	297.574	68.835	207.895	-1.59418	9.62422e-05	0.0116856	2B	Q9FH04.1 RecName: Full=Alcohol dehydrogenase-like 7 && PF00107:Zinc-binding dehydrogenase|PF08240:Alcohol dehydrogenase GroES-like domain	ADH_N
TraesCS2B03G0472100	TraesCS2B02G195600	678.875	343.834	407.745	1010.48	933.461	1011.55	476.818	985.162	-1.04572	0.000130762	0.0147241	2B	Q8H395.1 RecName: Full=Protein TIFY 10b; Short=OsTIFY10b; AltName: Full=Jasmonate ZIM domain-containing protein 7; Short=OsJAZ7; AltName: Full=OsJAZ6 && PF06200:tify domain|PF09425:Divergent CCT motif	Zim
TraesCS2B03G0539800	TraesCS2B02G223800	5.98504	12.0997	12.0813	29.0188	24.7822	76.1708	10.0554	43.3239	-2.118	0.000465154	0.0394785	2B	-	-
TraesCS2B03G0540900	TraesCS2B02G224600	110.296	99.8226	92.6237	21.7641	19.6192	13.2029	100.914	18.1954	2.47369	5.34237e-12	7.59473e-09	2B	Q2HJ41.1 RecName: Full=Pre-mRNA-splicing factor 18; AltName: Full=PRP18 homolog && PF08799:pre-mRNA processing factor 4 (PRP4) like|PF02840:Prp18 domain	-
TraesCS2B03G0636100	TraesCS2B02G255800	95.7607	66.5484	93.6304	0	0	0	85.3132	0	8.81832	9.80596e-13	1.67282e-09	2B	Q9FGL0.1 RecName: Full=WAT1-related protein At5g47470 && PF00892:EamA-like transporter family	DUF6
TraesCS2B03G0691900	TraesCS2B02G266600	424.083	379.124	485.267	190.695	172.443	222.419	429.492	195.185	1.13755	1.67265e-07	6.5975e-05	2B	P92934.1 RecName: Full=Amino acid permease 6; AltName: Full=Amino acid transporter AAP6 && PF01490:Transmembrane amino acid transporter protein	Aa_trans
TraesCS2B03G0742400	TraesCS2B02G286300	42.7503	35.2908	22.1491	104.675	97.0634	109.686	33.3968	103.808	-1.62947	1.42473e-06	0.000406776	2B	PF04520:Senescence regulator	-
TraesCS2B03G0811600	TraesCS2B02G311000	0	0	1.00678	63.2196	13.4237	71.0927	0.335593	49.2453	-7.17109	1.08701e-07	4.60711e-05	2B	-	-
TraesCS2B03G0856900	TraesCS2B02G328800	81.2256	158.305	130.881	27.9825	33.0429	6.09366	123.47	22.373	2.46451	1.07957e-06	0.000321687	2B	-	-
TraesCS2B03G0873400	TraesCS2B02G336000	51.3004	97.806	97.6576	304.698	118.748	425.541	82.2547	282.995	-1.78506	5.18154e-05	0.00714289	2B	P36591.2 RecName: Full=Dihydrofolate reductase && PF03959:Serine hydrolase (FSH1)	-
TraesCS2B03G0887900	TraesCS2B02G341200	215.462	213.762	279.885	133.694	112.552	107.655	236.369	117.967	1.00217	3.81859e-05	0.00562784	2B	Q66HG4.1 RecName: Full=Aldose 1-epimerase; AltName: Full=Galactose mutarotase && PF01263:Aldose 1-epimerase	Aldose_epim
TraesCS2B03G0931400	TraesCS2B02G362300	56.4304	55.457	43.2915	6.21832	5.16295	3.04683	51.7263	4.80937	3.43033	6.03761e-10	4.7355e-07	2B	-	-
TraesCS2B03G0949900	TraesCS2B02G369000	129.106	123.014	158.064	39.3827	54.7273	38.5932	136.728	44.2344	1.62781	5.38532e-08	2.60623e-05	2B	O04138.2 RecName: Full=Chitinase 4; AltName: Full=OsChia2b; AltName: Full=Pathogenesis related (PR)-3 chitinase 4; Flags: Precursor && PF00187:Chitin recognition protein|PF00182:Chitinase class I	-
TraesCS2B03G1001500	TraesCS2B02G392700	35.0553	20.1662	42.2847	92.2385	60.9228	90.3893	32.5021	81.1835	-1.31913	0.000634946	0.0496298	2B	Q9FZ80.1 RecName: Full=Cytosolic sulfotransferase 17; Short=AtSOT17; AltName: Full=Desulfoglucosinolate sulfotransferase C; Short=AtST5c && PF00685:Sulfotransferase domain	Sulfotransfer_1
TraesCS2B03G1008100	TraesCS2B02G396000	0	0	1.00678	44.5646	8.26072	20.3122	0.335593	24.3792	-6.1563	1.2491e-05	0.0023352	2B	O49561.2 RecName: Full=Gibberellin 2-beta-dioxygenase 8; AltName: Full=GA 2-oxidase 8; AltName: Full=Gibberellin 2-beta-hydroxylase 8; AltName: Full=Gibberellin 2-oxidase 8 && PF03171:2OG-Fe(II) oxygenase superfamily|PF14226:non-haem dioxygenase in morphine synthesis N-terminal	2OG-FeII_Oxy
TraesCS2B03G1009100	TraesCS2B02G396700	1226.08	1083.93	1684.34	3895.78	2036.27	4205.64	1331.45	3379.23	-1.34377	8.70923e-06	0.00173263	2B	Q7XUA6.1 RecName: Full=Probable aquaporin PIP2-3; AltName: Full=OsPIP2;3; AltName: Full=Plasma membrane intrinsic protein 2-3 && PF00230:Major intrinsic protein	-
TraesCS2B03G1009400	TraesCS2B02G396800	70.1105	50.4155	129.874	620.796	168.312	809.441	83.4668	532.85	-2.67523	9.33994e-08	4.06855e-05	2B	Q7XUA6.1 RecName: Full=Probable aquaporin PIP2-3; AltName: Full=OsPIP2;3; AltName: Full=Plasma membrane intrinsic protein 2-3 && PF00230:Major intrinsic protein	-
TraesCS2B03G1016000	TraesCS2B02G398500	50.4454	55.457	65.4406	130.585	135.269	97.4986	57.1143	121.118	-1.08654	0.000199259	0.0204157	2B	Q9C7F9.1 RecName: Full=Probable methyltransferase At1g27930 && PF04669:Polysaccharide biosynthesis	-
TraesCS2B03G1026200	TraesCS2B02G403000	21.3752	13.108	20.1356	122.294	39.2384	156.404	18.2063	105.979	-2.53811	8.50917e-07	0.000263927	2B	P49175.1 RecName: Full=Beta-fructofuranosidase 1; AltName: Full=Invertase 1; AltName: Full=Sucrose 1; Flags: Precursor && PF08244:Glycosyl hydrolases family 32 C terminal|PF11837:Domain of unknown function (DUF3357)|PF00251:Glycosyl hydrolases family 32 N-terminal domain	-
TraesCS2B03G1112800	TraesCS2B02G437300	94.9057	94.7811	108.732	48.7102	56.7924	35.5464	99.473	47.0163	1.08119	0.000496684	0.0415855	2B	C0LGH2.2 RecName: Full=Probable LRR receptor-like serine/threonine-protein kinase At1g56130; Flags: Precursor && PF11721:Di-glucose binding within endoplasmic reticulum|PF00069:Protein kinase domain	Pkinase
TraesCS2B03G1113000	TraesCS2B02G437400	113.716	86.7146	140.949	55.9649	52.6621	53.8273	113.793	54.1514	1.07139	0.000473377	0.040027	2B	C0LGH2.2 RecName: Full=Probable LRR receptor-like serine/threonine-protein kinase At1g56130; Flags: Precursor && PF11721:Di-glucose binding within endoplasmic reticulum|PF00069:Protein kinase domain	Pkinase
TraesCS2B03G1218900	TraesCS2B02G483000	27.3602	146.205	25.1695	10.3639	5.16295	9.14049	66.2449	8.22244	3.00799	3.25224e-05	0.00489896	2B	-	-
TraesCS2B03G1281300	TraesCS2B02G509700	16.2451	28.2327	30.2034	1.03639	2.06518	0	24.8937	1.03386	4.59242	7.68121e-06	0.00157874	2B	Q9LHQ6.1 RecName: Full=Organic cation/carnitine transporter 4; Short=AtOCT4 && PF00083:Sugar (and other) transporter	Sugar_tr
TraesCS2B03G1282300	TraesCS2B02G510000	11.9701	20.1662	43.2915	147.167	51.6295	111.717	25.1426	103.505	-2.04874	9.36823e-05	0.0114768	2B	Q9LHQ6.1 RecName: Full=Organic cation/carnitine transporter 4; Short=AtOCT4 && PF00083:Sugar (and other) transporter	Sugar_tr
TraesCS2B03G1291500	TraesCS2B02G514400	5.13004	3.02493	2.01356	48.7102	15.4888	43.6712	3.38951	35.9568	-3.38504	2.9176e-06	0.000716144	2B	D3THI6.1 RecName: Full=UDP-glycosyltransferase 71A15; AltName: Full=UDP-glucose:chalcone 2'-O-glucosyltransferase; AltName: Full=UDP-glucose:flavonol 2'-O-glucosyltransferase && PF00201:UDP-glucoronosyl and UDP-glucosyl transferase	UDPGT
TraesCS2B03G1341500	TraesCS2B02G535500	275.312	260.144	441.976	1104.79	687.705	1055.22	325.811	949.238	-1.54332	7.42399e-08	3.4462e-05	2B	F4JJL0.1 RecName: Full=Endonuclease 4; Short=AtENDO4; AltName: Full=Deoxyribonuclease ENDO4; AltName: Full=Single-stranded-nucleate endonuclease ENDO4; Flags: Precursor && PF02265:S1/P1 Nuclease	-
TraesCS2B03G1453700	TraesCS2B02G581900	0	0	0	37.3099	2.06518	80.2332	0	39.8694	-7.82804	0.000536478	0.043894	2B	P28814.1 RecName: Full=Barwin && PF00967:Barwin family	-
TraesCS2B03G1453800	TraesCS2B02G582000	1.71001	1.00831	0	24.8733	2.06518	78.202	0.906107	35.0468	-5.23146	3.86805e-05	0.00567622	2B	P28814.1 RecName: Full=Barwin && PF00967:Barwin family	-
TraesCS2D03G0010400	TraesCS2D02G005600	0	0	0	14.5094	6.19554	7.10927	0	9.27141	-5.72316	0.000218379	0.0218818	2D	Q7XHC4.1 RecName: Full=Acyl transferase 15; Short=OsAT15 && PF02458:Transferase family	-
TraesCS2D03G0015600	TraesCS2D02G008500	220.592	162.338	149.003	480.884	685.64	834.832	177.311	667.118	-1.90995	4.56403e-12	6.77034e-09	2D	Q9FG94.1 RecName: Full=Cytosolic sulfotransferase 1; Short=AtSOT1 && PF00685:Sulfotransferase domain	Sulfotransfer_1
TraesCS2D03G0039600	TraesCS2D02G020200	513.859	544.487	698.705	273.606	118.748	112.733	585.684	168.362	1.79863	2.71603e-07	0.00010018	2D	Q2QYE1.2 RecName: Full=Probable apyrase 3; Short=OsAPY3; AltName: Full=ATP-diphosphatase; AltName: Full=ATP-diphosphohydrolase; AltName: Full=Adenosine diphosphatase; Short=ADPase; Flags: Precursor && PF01150:GDA1/CD39 (nucleoside phosphatase) family	-
TraesCS2D03G0052100	TraesCS2D02G026900	92.3407	68.565	33.2237	185.513	186.899	198.044	64.7098	190.152	-1.55006	1.25278e-05	0.00233569	2D	Q9URY4.1 RecName: Full=Putative amidase C869.01; Flags: Precursor && PF01425:Amidase	Amidase
TraesCS2D03G0052200	TraesCS2D02G027000	57.2854	72.5983	89.6033	167.895	170.377	155.388	73.1623	164.553	-1.17324	1.43716e-05	0.00262212	2D	Q9URY4.1 RecName: Full=Putative amidase C869.01; Flags: Precursor && PF01425:Amidase	Amidase
TraesCS2D03G0055100	TraesCS2D02G028600	211.187	144.188	529.566	3836.71	1136.88	4369.16	294.98	3114.25	-3.40037	4.67558e-06	0.00107494	2D	Q84QK0.1 RecName: Full=12-oxophytodienoate reductase 1; AltName: Full=12-oxophytodienoate-10,11-reductase 1; Short=OPDA-reductase 1; Short=OsOPR1 && PF00724:NADH:flavin oxidoreductase / NADH oxidase family	Oxidored_FMN
TraesCS2D03G0071700	TraesCS2D02G039100	48.7354	24.1994	57.3864	130.585	79.5094	185.857	43.4404	131.984	-1.60188	0.000145046	0.015938	2D	Q9M1V2.1 RecName: Full=Cytosolic sulfotransferase 5; Short=AtSOT5; AltName: Full=Flavonoid 7-sulfotransferase 3a; Short=AtST3a && PF00685:Sulfotransferase domain	Sulfotransfer_1
TraesCS2D03G0118900	TraesCS2D02G061200	135.946	147.213	88.5965	66.3288	46.4665	57.8898	123.919	56.895	1.12387	0.000470646	0.0398455	2D	PF01190:Pollen proteins Ole e I like	-
TraesCS2D03G0134800	TraesCS2D02G069000	11.1151	7.05817	28.1898	162.713	23.7496	114.764	15.4544	100.409	-2.70363	4.73372e-05	0.00667386	2D	D3UAG6.1 RecName: Full=UDP-glycosyltransferase 88F5; AltName: Full=UDP-glucose:chalcone 2'-O-glucosyltransferase && PF00201:UDP-glucoronosyl and UDP-glucosyl transferase	UDPGT
TraesCS2D03G0135200	TraesCS2D02G069100	0	0	4.02712	66.3288	5.16295	40.6244	1.34237	37.372	-4.84387	2.31827e-05	0.00381288	2D	D3UAG7.1 RecName: Full=UDP-glycosyltransferase 88F3; AltName: Full=UDP-glucose:chalcone 2'-O-glucosyltransferase && PF00201:UDP-glucoronosyl and UDP-glucosyl transferase	UDPGT
TraesCS2D03G0136800	TraesCS2D02G069900	13.6801	12.0997	23.1559	131.621	66.0858	187.888	16.3119	128.532	-2.98231	1.86081e-10	1.76101e-07	2D	P22220.1 RecName: Full=Arginine decarboxylase; Short=ADC; Short=ARGDC && PF00278:Pyridoxal-dependent decarboxylase, C-terminal sheet domain|PF02784:Pyridoxal-dependent decarboxylase, pyridoxal binding domain	-
TraesCS2D03G0145600	TraesCS2D02G074200	27.3602	24.1994	28.1898	130.585	100.161	121.873	26.5831	117.54	-2.1436	1.26888e-11	1.57426e-08	2D	Q6Z1I5.1 RecName: Full=Acyl-[acyl-carrier-protein] desaturase 7, chloroplastic; Flags: Precursor >A2YS76.1 RecName: Full=Acyl-[acyl-carrier-protein] desaturase 7, chloroplastic; Flags: Precursor && PF03405:Fatty acid desaturase	-
TraesCS2D03G0299100	TraesCS2D02G142400	5.13004	5.04155	8.05423	14.5094	27.8799	60.9366	6.07527	34.442	-2.50867	0.000241945	0.0237206	2D	Q9M8J2.1 RecName: Full=Probable galacturonosyltransferase-like 4; AltName: Full=Galactinol synthase 9; Short=AtGolS9; Short=GolS-9 && PF01501:Glycosyl transferase family 8	Glyco_transf_8
TraesCS2D03G0309000	TraesCS2D02G147100	297.542	190.571	335.257	583.486	486.35	605.304	274.457	558.38	-1.02421	7.16282e-05	0.0093634	2D	Q9LT10.1 RecName: Full=Probable carboxylesterase 18; AltName: Full=AtCXE18 && PF07859:alpha/beta hydrolase fold	Abhydrolase_3
TraesCS2D03G0331600	TraesCS2D02G158600	73.5305	68.565	105.712	247.697	180.703	151.326	82.6025	193.242	-1.22734	5.76883e-05	0.00780244	2D	PF13419:Haloacid dehalogenase-like hydrolase	-
TraesCS2D03G0382200	TraesCS2D02G182700	159.886	192.587	196.322	61.1468	85.705	61.9522	182.932	69.6013	1.39322	2.28507e-07	8.75989e-05	2D	Q6Z4H0.1 RecName: Full=Probable 6-phosphogluconolactonase 2; Short=6PGL 2 >A2YNH4.1 RecName: Full=Probable 6-phosphogluconolactonase 2; Short=6PGL 2 && PF01182:Glucosamine-6-phosphate isomerases/6-phosphogluconolactonase	-
TraesCS2D03G0442200	TraesCS2D02G211100	95.7607	127.047	272.837	653.96	318.038	746.474	165.215	572.824	-1.79523	1.74205e-05	0.003048	2D	O64515.1 RecName: Full=Organic cation/carnitine transporter 2; Short=AtOCT2 && PF00083:Sugar (and other) transporter	Sugar_tr
TraesCS2D03G0481700	TraesCS2D02G227800	76.0956	48.3989	59.4	164.786	135.269	191.95	61.2981	164.002	-1.4156	1.59494e-06	0.000440623	2D	Q7EZ57.1 RecName: Full=18.8 kDa class V heat shock protein; AltName: Full=18.8 kDa heat shock protein; Short=OsHsp18.8 && PF00011:Hsp20/alpha crystallin family	-
TraesCS2D03G0677700	TraesCS2D02G292300	0	1.00831	3.02034	50.783	4.13036	90.3893	1.34288	48.4342	-5.21947	3.10735e-06	0.000754577	2D	-	-
TraesCS2D03G0715100	TraesCS2D02G310300	38.4753	45.3739	62.4203	14.5094	16.5214	3.04683	48.7565	11.3592	2.10226	0.000170212	0.0180634	2D	-	-
TraesCS2D03G0765500	TraesCS2D02G333800	163.306	174.438	137.929	459.119	407.873	379.838	158.557	415.61	-1.38976	5.97103e-11	6.08128e-08	2D	Q7XKV4.2 RecName: Full=Beta-glucosidase 12; Short=Os4bglu12; Flags: Precursor && PF00232:Glycosyl hydrolase family 1	Glyco_hydro_1
TraesCS2D03G0795400	TraesCS2D02G347300	27.3602	22.1828	37.2508	162.713	49.5643	303.667	28.9313	171.982	-2.57232	2.24017e-06	0.000574672	2D	Q96288.1 RecName: Full=B-box zinc finger protein 24; AltName: Full=Salt tolerance protein && PF00643:B-box zinc finger	zf-B_box
TraesCS2D03G0837100	TraesCS2D02G364700	167.581	206.703	156.051	610.432	239.561	815.535	176.778	555.176	-1.65127	2.04709e-05	0.0034748	2D	Q7XU38.3 RecName: Full=Cytochrome P450 87A3 && PF00067:Cytochrome P450	p450
TraesCS2D03G0860200	TraesCS2D02G376100	127.396	97.806	195.315	856.056	297.386	1249.2	140.172	800.881	-2.51474	1.7042e-08	9.45441e-06	2D	Q7XUA6.1 RecName: Full=Probable aquaporin PIP2-3; AltName: Full=OsPIP2;3; AltName: Full=Plasma membrane intrinsic protein 2-3 && PF00230:Major intrinsic protein	-
TraesCS2D03G0872500	TraesCS2D02G382600	53.0104	31.2576	66.4474	204.168	115.65	162.498	50.2385	160.772	-1.67726	3.08898e-06	0.000752797	2D	P49175.1 RecName: Full=Beta-fructofuranosidase 1; AltName: Full=Invertase 1; AltName: Full=Sucrose 1; Flags: Precursor && PF00251:Glycosyl hydrolases family 32 N-terminal domain|PF11837:Domain of unknown function (DUF3357)|PF08244:Glycosyl hydrolases family 32 C terminal	-
TraesCS2D03G1033700	TraesCS2D02G463200	4.27503	0	5.03389	30.0552	15.4888	20.3122	3.10298	21.9521	-2.80708	0.000503346	0.0418354	2D	U3U992.1 RecName: Full=7-deoxyloganetic acid glucosyltransferase; AltName: Full=UDP-glucose glucosyltransferase 8; Short=CrUGT8; AltName: Full=UDP-glycosyltransferase 709C2 && PF00201:UDP-glucoronosyl and UDP-glucosyl transferase	UDPGT
TraesCS2D03G1059500	TraesCS2D02G473900	0	0	1.00678	14.5094	2.06518	26.4059	0.335593	14.3268	-5.39026	0.000500448	0.0417328	2D	-	-
TraesCS2D03G1079200	TraesCS2D02G483500	121.411	143.18	369.488	1557.69	1028.46	1112.09	211.36	1232.75	-2.54541	7.10394e-11	7.1287e-08	2D	Q9LHQ6.1 RecName: Full=Organic cation/carnitine transporter 4; Short=AtOCT4 && PF00083:Sugar (and other) transporter	Sugar_tr
TraesCS2D03G1177600	TraesCS2D02G528400	23.9402	20.1662	35.2373	72.5471	84.6724	82.2644	26.4479	79.828	-1.59633	7.83149e-06	0.00159522	2D	Q43191.1 RecName: Full=Probable linoleate 9S-lipoxygenase 5; AltName: Full=Leaf lipoxygenase && PF00305:Lipoxygenase	Lipoxygenase
TraesCS2D03G1177900	TraesCS2D02G528500	200.071	215.778	303.04	527.521	498.741	468.196	239.63	498.153	-1.05703	4.37212e-06	0.00101476	2D	Q43191.1 RecName: Full=Probable linoleate 9S-lipoxygenase 5; AltName: Full=Leaf lipoxygenase && PF00305:Lipoxygenase	Lipoxygenase
TraesCS2D03G1228200	TraesCS2D02G552100	0	0	0	42.4919	16.5214	78.202	0	45.7384	-8.02652	2.58209e-09	1.69417e-06	2D	P28814.1 RecName: Full=Barwin && PF00967:Barwin family	-
TraesCS3A03G0023200	TraesCS3A02G010900	11.1151	15.1246	23.1559	66.3288	29.9451	72.1083	16.4652	56.1274	-1.77689	0.000366938	0.0327092	3A	Q9FF12.1 RecName: Full=Flavin-containing monooxygenase FMO GS-OX-like 9; AltName: Full=Flavin-monooxygenase glucosinolate S-oxygenase-like 9 && PF00743:Flavin-binding monooxygenase-like	FMO-like
TraesCS3A03G0046900	TraesCS3A02G023100	118.846	80.6648	108.732	187.586	227.17	300.621	102.748	238.459	-1.21295	1.9456e-05	0.00333572	3A	Q6GQ23.1 RecName: Full=EGF domain-specific O-linked N-acetylglucosamine transferase; AltName: Full=Extracellular O-linked N-acetylglucosamine transferase; Flags: Precursor && PF04577:Protein of unknown function (DUF563)	-
TraesCS3A03G0112200	TraesCS3A02G053900	34.2003	39.3241	33.2237	3.10916	4.13036	4.06244	35.5827	3.76732	3.23839	1.82395e-07	7.11204e-05	3A	Q9AWS7.1 RecName: Full=Putative AP2/ERF and B3 domain-containing protein Os01g0140700 && PF02362:B3 DNA binding domain|PF00847:AP2 domain	B3
TraesCS3A03G0206600	TraesCS3A02G093400	7.69506	12.0997	10.0678	61.1468	30.9777	32.4995	9.95419	41.5414	-2.06815	8.27447e-05	0.0103791	3A	Q76BW5.1 RecName: Full=Xyloglucan endotransglycosylase/hydrolase protein 8; AltName: Full=End-xyloglucan transferase; AltName: Full=OsXRT5; AltName: Full=OsXTH8; Flags: Precursor && PF00722:Glycosyl hydrolases family 16|PF06955:Xyloglucan endo-transglycosylase (XET) C-terminus	-
TraesCS3A03G0206900	TraesCS3A02G093600	48.7354	37.3075	89.6033	174.113	182.768	103.592	58.5487	153.491	-1.39208	0.000344436	0.031296	3A	Q76BW5.1 RecName: Full=Xyloglucan endotransglycosylase/hydrolase protein 8; AltName: Full=End-xyloglucan transferase; AltName: Full=OsXRT5; AltName: Full=OsXTH8; Flags: Precursor && PF06955:Xyloglucan endo-transglycosylase (XET) C-terminus|PF00722:Glycosyl hydrolases family 16	-
TraesCS3A03G0234800	TraesCS3A02G107200	110.296	160.321	304.047	52.8557	51.6295	55.8586	191.555	53.4479	1.8399	2.3063e-06	0.00058942	3A	Q9FU27.1 RecName: Full=Zinc finger CCCH domain-containing protein 2; Short=OsC3H2; AltName: Full=Protein DELAY OF THE ONSET OF SENESCENCE; Short=OsDOS && PF00642:Zinc finger C-x8-C-x5-C-x3-H type (and similar)	zf-CCCH
TraesCS3A03G0268400	TraesCS3A02G122600	147.916	209.728	225.518	55.9649	56.7924	34.5307	194.388	49.096	1.98452	3.21837e-10	2.85211e-07	3A	Q3I411.1 RecName: Full=Gibberellin 3-beta-dioxygenase 2-1; AltName: Full=Gibberellin 3 beta-hydroxylase 2-1; AltName: Full=Gibberellin 3-oxidase 2-1 && PF14226:non-haem dioxygenase in morphine synthesis N-terminal|PF03171:2OG-Fe(II) oxygenase superfamily	2OG-FeII_Oxy
TraesCS3A03G0294000	TraesCS3A02G309000	146.206	182.504	254.715	563.795	214.779	968.892	194.475	582.488	-1.58335	0.000392957	0.0343772	3A	P30110.1 RecName: Full=Glutathione S-transferase 1; AltName: Full=GST class-phi && PF00043:Glutathione S-transferase, C-terminal domain|PF02798:Glutathione S-transferase, N-terminal domain	GST_C
TraesCS3A03G0294100	TraesCS3A02G309100	7.69506	6.04986	26.1763	42.4919	26.8473	155.388	13.3071	74.9092	-2.49914	0.000484344	0.0407022	3A	P30111.1 RecName: Full=Glutathione S-transferase 2; AltName: Full=GST class-phi && PF00043:Glutathione S-transferase, C-terminal domain|PF02798:Glutathione S-transferase, N-terminal domain	GST_N
TraesCS3A03G0319000	TraesCS3A02G132700	277.877	254.094	315.122	872.638	349.015	876.472	282.364	699.375	-1.30858	0.0001136	0.0132963	3A	PF04832:SOUL heme-binding protein	-
TraesCS3A03G0319200	TraesCS3A02G132500	134.236	161.33	261.763	582.45	416.134	869.362	185.776	622.649	-1.7462	2.93073e-07	0.000105255	3A	PF04398:Protein of unknown function, DUF538	-
TraesCS3A03G0320700	TraesCS3A02G132000	145.351	114.947	246.661	378.281	296.353	433.666	168.986	369.433	-1.12926	0.000371801	0.0330346	3A	O64697.1 RecName: Full=Cytochrome P450 710A1; AltName: Full=C-22 sterol desaturase && PF00067:Cytochrome P450	p450
TraesCS3A03G0320800	TraesCS3A02G131900	79.5156	50.4155	47.3186	271.533	185.866	215.309	59.0832	224.236	-1.91823	3.29157e-10	2.86146e-07	3A	Q5JMK6.1 RecName: Full=Basic leucine zipper 6; Short=OsbZIP06; Short=bZIP protein 6 && PF00170:bZIP transcription factor	bZIP_1
TraesCS3A03G0589500	TraesCS3A02G227400	49.5904	71.59	80.5423	319.207	146.628	233.59	67.2409	233.142	-1.79689	2.47771e-07	9.28783e-05	3A	Q9SHJ5.1 RecName: Full=Glycerol-3-phosphate acyltransferase 1; Short=AtGPAT1 && PF01553:Acyltransferase	Acyltransferase
TraesCS3A03G0592600	TraesCS3A02G229700	166.726	97.806	157.058	354.444	254.017	294.527	140.53	300.996	-1.09712	8.07578e-05	0.0102049	3A	Q0JKZ0.1 RecName: Full=Cinnamoyl-CoA reductase-like SNL6; AltName: Full=Protein SUPPRESSOR OF NH1-MEDIATED LESION 6 && PF01073:3-beta hydroxysteroid dehydrogenase/isomerase family	-
TraesCS3A03G0649400	TraesCS3A02G252900	59.8504	75.6232	73.4949	26.9461	25.8147	32.4995	69.6562	28.4201	1.29089	0.000196858	0.0202	3A	Q9ZPY8.2 RecName: Full=Transcription factor ABA-INDUCIBLE bHLH-TYPE; Short=AtAIB; AltName: Full=Basic helix-loop-helix protein 17; Short=AtbHLH17; Short=bHLH 17; AltName: Full=Transcription factor EN 35; AltName: Full=bHLH transcription factor bHLH017 && PF14215:bHLH-MYC and R2R3-MYB transcription factors N-terminal|PF00010:Helix-loop-helix DNA-binding domain	HLH
TraesCS3A03G0684000	TraesCS3A02G269500	31.6352	25.2077	39.2644	110.893	110.487	64.9991	32.0358	95.4599	-1.57509	1.83783e-05	0.00320737	3A	-	-
TraesCS3A03G0704100	TraesCS3A02G279700	11.1151	15.1246	19.1288	216.605	57.825	128.983	15.1228	134.471	-3.15862	3.75485e-10	3.06591e-07	3A	Q4R1I9.1 RecName: Full=Anthocyanidin 5,3-O-glucosyltransferase; AltName: Full=UDP-glucose: anthocyanidin 5,3-O-glucosyltransferase && PF00201:UDP-glucoronosyl and UDP-glucosyl transferase	UDPGT
TraesCS3A03G0732000	TraesCS3A02G294000	11.9701	12.0997	3.02034	55.9649	47.4991	33.5151	9.03005	45.6597	-2.32763	2.30736e-05	0.00381229	3A	Q9XG83.1 RecName: Full=Gibberellin 2-beta-dioxygenase; AltName: Full=GA 2-oxidase; AltName: Full=Gibberellin 2-beta-hydroxylase; AltName: Full=Gibberellin 2-oxidase && PF14226:non-haem dioxygenase in morphine synthesis N-terminal|PF03171:2OG-Fe(II) oxygenase superfamily	2OG-FeII_Oxy
TraesCS3A03G0757000	TraesCS3A02G296300	54.7204	59.4903	120.813	166.858	160.051	227.497	78.3414	184.802	-1.24123	0.000497689	0.0416186	3A	Q9SSC7.1 RecName: Full=Protein LURP-one-related 5 && PF04525:LURP-one-related	-
TraesCS3A03G0762900	TraesCS3A02G321700	85.5006	65.5401	40.2712	369.99	103.259	290.465	63.7706	254.571	-1.99455	1.01352e-05	0.00197036	3A	PF03126:Plus-3 domain	-
TraesCS3A03G0824200	TraesCS3A02G344800	130.816	123.014	226.525	366.881	274.669	374.76	160.118	338.77	-1.08247	0.000270072	0.0260415	3A	Q40636.2 RecName: Full=Expansin-A2; AltName: Full=Alpha-expansin-2; AltName: Full=OsEXP2; AltName: Full=OsEXPA2; AltName: Full=OsaEXPa1.23; AltName: Full=RiExB; AltName: Full=RiExC; Flags: Precursor && PF01357:Pollen allergen|PF03330:Rare lipoprotein A (RlpA)-like double-psi beta-barrel	-
TraesCS3A03G0836500	TraesCS3A02G351000	117.991	116.964	168.132	493.32	220.974	878.503	134.362	530.932	-1.98298	2.68619e-06	0.00067142	3A	Q9SIZ6.1 RecName: Full=GDSL esterase/lipase At2g40250; AltName: Full=Extracellular lipase At2g40250; Flags: Precursor && PF00657:GDSL-like Lipase/Acylhydrolase	Lipase_GDSL
TraesCS3A03G0856900	TraesCS3A02G360500	10.2601	7.05817	17.1152	173.077	11.3585	184.841	11.4778	123.092	-3.42439	4.34108e-06	0.001011	3A	Q0JG75.2 RecName: Full=Photosystem II reaction center PSB28 protein, chloroplastic; AltName: Full=Photosystem II protein W-like; Flags: Precursor && PF03912:Psb28 protein	-
TraesCS3A03G0864400	TraesCS3A02G363400	237.692	315.601	181.22	1010.48	366.569	1050.14	244.838	809.063	-1.72454	6.43054e-06	0.00138204	3A	Q84TF0.1 RecName: Full=Aldo-keto reductase family 4 member C10 && PF00248:Aldo/keto reductase family	Aldo_ket_red
TraesCS3A03G0869500	TraesCS3A02G365600	13.6801	12.0997	42.2847	599.032	134.237	422.494	22.6882	385.254	-4.09114	1.28501e-13	2.82856e-10	3A	Q9SR77.1 RecName: Full=Heme-binding-like protein At3g10130, chloroplastic; Flags: Precursor && PF04832:SOUL heme-binding protein	-
TraesCS3A03G0872800	TraesCS3A02G367900	45.3153	79.6565	151.017	30.0552	32.0103	9.14049	91.9962	23.7353	1.95352	0.000376293	0.0333036	3A	Q9SND9.1 RecName: Full=Uncharacterized acetyltransferase At3g50280 && PF02458:Transferase family	-
TraesCS3A03G0875300	TraesCS3A02G368800	112.006	96.7977	126.854	48.7102	38.2058	40.6244	111.886	42.5135	1.39627	3.27959e-06	0.000790776	3A	Q9LY61.1 RecName: Full=Nematode resistance protein-like HSPRO1; AltName: Full=AKINbetagamma-interacting protein 1; AltName: Full=Ortholog of sugar beet HS1 PRO-1 protein 1; AltName: Full=Protein Hs1pro-1 && PF07231:Hs1pro-1 N-terminus|PF07014:Hs1pro-1 protein C-terminus	-
TraesCS3A03G0911700	TraesCS3A02G386600	10.2601	15.1246	11.0746	0	0	0	12.1531	0	6.00411	3.24688e-05	0.00489896	3A	-	-
TraesCS3A03G0924200	TraesCS3A02G393300	77.8056	56.4653	71.4813	149.24	148.693	126.951	68.5841	141.628	-1.04338	0.000103496	0.0123682	3A	P54769.1 RecName: Full=Tyrosine/DOPA decarboxylase 2; Includes: RecName: Full=DOPA decarboxylase; Short=DDC; Includes: RecName: Full=Tyrosine decarboxylase [Papaver somniferum] && PF00282:Pyridoxal-dependent decarboxylase conserved domain	-
TraesCS3A03G0950800	TraesCS3A02G406200	246.242	430.548	506.41	29.0188	42.3362	26.4059	394.4	32.587	3.59675	1.05577e-24	9.00528e-21	3A	Q0JH50.1 RecName: Full=Gibberellin 20 oxidase 2; AltName: Full=GA 20-oxidase 2; AltName: Full=Gibberellin C-20 oxidase 2; AltName: Full=Os20ox2; AltName: Full=Protein semidwarf-1 >P0C5H5.1 RecName: Full=Gibberellin 20 oxidase 2; AltName: Full=GA 20-oxidase 2; AltName: Full=Gibberellin C-20 oxidase 2; AltName: Full=Os20ox2; AltName: Full=Protein semidwarf-1 && PF03171:2OG-Fe(II) oxygenase superfam…	2OG-FeII_Oxy
TraesCS3A03G0980100	TraesCS3A02G422200	17.9551	12.0997	27.183	124.366	28.9125	160.466	19.0793	104.582	-2.45554	2.27432e-05	0.00378519	3A	Q84MB3.1 RecName: Full=1-aminocyclopropane-1-carboxylate oxidase homolog 1 && PF14226:non-haem dioxygenase in morphine synthesis N-terminal|PF03171:2OG-Fe(II) oxygenase superfamily	2OG-FeII_Oxy
TraesCS3A03G1136000	TraesCS3A02G483800	62.4155	59.4903	69.4677	13.473	18.5866	24.3746	63.7912	18.8114	1.76029	7.58817e-06	0.00156907	3A	Q02437.1 RecName: Full=Glucan endo-1,3-beta-glucosidase GIV; AltName: Full=(1->3)-beta-glucan endohydrolase GIV; AltName: Full=(1->3)-beta-glucanase isoenzyme GIV; AltName: Full=Beta-1,3-endoglucanase GIV && PF00332:Glycosyl hydrolases family 17	Glyco_hydro_17
TraesCS3A03G1143400	TraesCS3A02G487300	39.3303	64.5318	89.6033	1.03639	4.13036	4.06244	64.4885	3.0764	4.38432	4.18582e-11	4.46294e-08	3A	-	-
TraesCS3A03G1143800	TraesCS3A02G487500	223.157	193.595	179.207	34.2008	51.6295	52.8117	198.653	46.214	2.10424	1.51851e-13	3.23809e-10	3A	Q9LPR8.1 RecName: Full=Scarecrow-like protein 3; Short=AtSCL3; AltName: Full=GRAS family protein 5; Short=AtGRAS-5 && PF03514:GRAS domain family	GRAS
TraesCS3A03G1264200	TraesCS3A02G533600	70.1105	58.482	125.847	989.75	171.41	1317.25	84.8133	826.135	-3.28432	7.33367e-05	0.00953196	3A	Q9SR22.1 RecName: Full=Pectin acetylesterase 5; Flags: Precursor && PF03283:Pectinacetylesterase	-
TraesCS3A03G1265700	TraesCS3A02G534500	86.3556	62.5152	127.861	216.605	151.791	400.15	92.2439	256.182	-1.47422	0.000228951	0.0227077	3A	Q9LFF9.1 RecName: Full=Soluble inorganic pyrophosphatase 4; AltName: Full=Pyrophosphate phospho-hydrolase 4; Short=PPase 4 && PF00719:Inorganic pyrophosphatase	Pyrophosphatase
TraesCS3B03G0006900	TraesCS3B02G003500	19.6651	14.1163	12.0813	44.5646	94.9983	33.5151	15.2876	57.6927	-1.90929	0.000221953	0.0222073	3B	-	-
TraesCS3B03G0142100	TraesCS3B02G063400	36.7653	48.3989	51.3457	89.1293	90.8679	106.639	45.5033	95.5454	-1.07476	0.000428536	0.0369684	3B	Q43767.1 RecName: Full=Non-specific lipid-transfer protein 4.1; Short=LTP 4.1; AltName: Full=CW-21; Short=CW21; Flags: Precursor && PF00234:Protease inhibitor/seed storage/LTP family	-
TraesCS3B03G0247200	TraesCS3B02G107600	138.511	151.246	187.261	49.7466	72.2813	71.0927	159.006	64.3735	1.30314	5.35553e-06	0.00120212	3B	C0LGR3.1 RecName: Full=Probable LRR receptor-like serine/threonine-protein kinase At4g26540; Flags: Precursor && PF08263:Leucine rich repeat N-terminal domain|PF13855:Leucine rich repeat|PF00069:Protein kinase domain	Pkinase
TraesCS3B03G0248400	TraesCS3B02G108200	126.541	88.7312	120.813	36.2735	45.434	60.9366	112.029	47.548	1.23694	0.000160187	0.0172136	3B	Q94A02.1 RecName: Full=Tryptophan aminotransferase-related protein 2 && PF04864:Allinase	-
TraesCS3B03G0249300	TraesCS3B02G108700	272.747	160.321	324.183	658.106	439.883	522.024	252.417	540.004	-1.09677	0.000231037	0.0228205	3B	Q76BW5.1 RecName: Full=Xyloglucan endotransglycosylase/hydrolase protein 8; AltName: Full=End-xyloglucan transferase; AltName: Full=OsXRT5; AltName: Full=OsXTH8; Flags: Precursor && PF00722:Glycosyl hydrolases family 16|PF06955:Xyloglucan endo-transglycosylase (XET) C-terminus	-
TraesCS3B03G0288800	TraesCS3B02G124200	76.9506	51.4238	74.5016	162.713	114.617	140.154	67.6253	139.161	-1.03879	0.000437847	0.0375816	3B	-	-
TraesCS3B03G0336700	TraesCS3B02G141800	145.351	99.8226	138.935	31.0916	20.6518	33.5151	128.036	28.4195	2.17227	1.88393e-10	1.76101e-07	3B	Q3I409.1 RecName: Full=Gibberellin 3-beta-dioxygenase 2-3; AltName: Full=Gibberellin 3 beta-hydroxylase 2-3; AltName: Full=Gibberellin 3-oxidase 2-3 && PF03171:2OG-Fe(II) oxygenase superfamily|PF14226:non-haem dioxygenase in morphine synthesis N-terminal	2OG-FeII_Oxy
TraesCS3B03G0344900	TraesCS3B02G144700	59.8504	49.4072	70.4745	173.077	121.846	180.779	59.9107	158.567	-1.4043	1.98466e-06	0.000526954	3B	Q96282.1 RecName: Full=Chloride channel protein CLC-c; Short=AtCLC-c; AltName: Full=CBS domain-containing protein CBSCLC4 && PF00654:Voltage gated chloride channel	Voltage_CLC
TraesCS3B03G0398400	TraesCS3B02G166900	41.8953	37.3075	75.5084	405.227	101.194	465.149	51.5704	323.857	-2.65222	9.34083e-08	4.06855e-05	3B	PF04832:SOUL heme-binding protein	-
TraesCS3B03G0461100	TraesCS3B02G191100	88.0657	107.889	157.058	27.9825	26.8473	23.359	117.671	26.0629	2.17302	1.65234e-09	1.12751e-06	3B	Q8L493.1 RecName: Full=D-amino-acid transaminase, chloroplastic; AltName: Full=Aminodeoxychorismate lyase; Short=AtADCL; AltName: Full=Branched-chain-amino-acid aminotransferase-like protein 3; Flags: Precursor && PF01063:Amino-transferase class IV	-
TraesCS3B03G0498100	TraesCS3B02G205100	153.901	249.052	260.756	60.1105	72.2813	58.9054	221.236	63.7657	1.79313	2.18461e-09	1.44729e-06	3B	PF03242:Late embryogenesis abundant protein	-
TraesCS3B03G0668300	TraesCS3B02G256200	2.56502	12.0997	5.03389	30.0552	55.7599	19.2966	6.56621	35.0372	-2.43332	0.000388451	0.0342022	3B	H2DH21.1 RecName: Full=Cytochrome P450 CYP72A219; AltName: Full=Cytochrome P450 CYP72A129 [Panax ginseng] && PF00067:Cytochrome P450	p450
TraesCS3B03G0690200	TraesCS3B02G263100	118.846	158.305	79.5355	258.06	264.343	203.122	118.895	241.842	-1.02431	0.000600572	0.0476526	3B	Q54V77.1 RecName: Full=CTP synthase; AltName: Full=CTP synthetase; AltName: Full=UTP--ammonia ligase && PF06418:CTP synthase N-terminus|PF00117:Glutamine amidotransferase class-I	CTP_synth_N
TraesCS3B03G0728300	TraesCS3B02G282400	142.786	126.039	176.186	438.392	509.067	221.403	148.337	389.621	-1.39329	2.26582e-05	0.00378519	3B	P45851.1 RecName: Full=Oxalate oxidase 2; AltName: Full=Germin; Flags: Precursor && PF00190:Cupin	-
TraesCS3B03G0865700	TraesCS3B02G340800	9.40507	29.241	42.2847	117.112	75.3791	166.56	26.9769	119.684	-2.15883	1.66806e-05	0.00297188	3B	Q9SSC7.1 RecName: Full=Protein LURP-one-related 5 && PF04525:LURP-one-related	-
TraesCS3B03G0875100	TraesCS3B02G343800	49.5904	45.3739	90.6101	633.233	110.487	423.509	61.8581	389.076	-2.65419	2.50445e-07	9.28783e-05	3B	PF03126:Plus-3 domain	-
TraesCS3B03G0884300	TraesCS3B02G347300	112.861	196.62	223.505	612.505	457.437	345.307	177.662	471.75	-1.41081	1.03623e-05	0.00199743	3B	-	-
TraesCS3B03G0975100	TraesCS3B02G390500	99.1807	116.964	109.739	21.7641	48.5317	30.4683	108.628	33.5881	1.69268	2.22568e-06	0.000573107	3B	Q41350.1 RecName: Full=Osmotin-like protein; Flags: Precursor && PF00314:Thaumatin family	Thaumatin
TraesCS3B03G0992500	TraesCS3B02G397400	0.855006	5.04155	21.1424	128.512	41.3036	108.67	9.01297	92.8286	-3.382	3.44713e-06	0.000822454	3B	Q9SR77.1 RecName: Full=Heme-binding-like protein At3g10130, chloroplastic; Flags: Precursor && PF04832:SOUL heme-binding protein	-
TraesCS3B03G1010400	TraesCS3B02G406000	17.9551	24.1994	29.1966	72.5471	35.1081	140.154	23.7837	82.6031	-1.80036	0.000461677	0.0392322	3B	P23472.2 RecName: Full=Hevamine-A; Includes: RecName: Full=Chitinase; Includes: RecName: Full=Lysozyme; Flags: Precursor && PF00704:Glycosyl hydrolases family 18	-
TraesCS3B03G1082200	TraesCS3B02G438400	311.222	356.942	408.752	173.077	188.964	142.185	358.972	168.075	1.09421	1.74194e-06	0.000471685	3B	-	-
TraesCS3B03G1087000	TraesCS3B02G439900	160.741	202.67	202.363	22.8005	24.7822	21.3278	188.591	22.9702	3.03651	3.97825e-23	2.46786e-19	3B	Q0JH50.1 RecName: Full=Gibberellin 20 oxidase 2; AltName: Full=GA 20-oxidase 2; AltName: Full=Gibberellin C-20 oxidase 2; AltName: Full=Os20ox2; AltName: Full=Protein semidwarf-1 >P0C5H5.1 RecName: Full=Gibberellin 20 oxidase 2; AltName: Full=GA 20-oxidase 2; AltName: Full=Gibberellin C-20 oxidase 2; AltName: Full=Os20ox2; AltName: Full=Protein semidwarf-1 && PF14226:non-haem dioxygenase in morph…	2OG-FeII_Oxy
TraesCS3B03G1206900	TraesCS3B02G488100	164.161	196.62	180.213	382.427	317.005	548.43	180.332	415.954	-1.20662	4.59574e-06	0.00106305	3B	Q5SMM8.1 RecName: Full=Putrescine hydroxycinnamoyltransferase 1; Short=OsPHT1; AltName: Full=BAHD-like hydroxycinnamoyl transferase HCT3; AltName: Full=Hydroxycinnamoyltransferase 3; Short=OsHCT3 && PF02458:Transferase family	-
TraesCS3B03G1241800	TraesCS3B02G501900	210.332	146.205	170.146	86.0201	106.357	57.8898	175.561	83.4222	1.07518	0.000467277	0.0396094	3B	Q9SR05.1 RecName: Full=Receptor-like protein kinase ANXUR1; Flags: Precursor && PF07714:Protein tyrosine kinase	Pkinase_Tyr
TraesCS3B03G1333200	TraesCS3B02G535100	110.296	103.856	117.793	48.7102	45.434	37.5776	110.648	43.9072	1.33388	4.28122e-06	0.0010031	3B	Q9LPR8.1 RecName: Full=Scarecrow-like protein 3; Short=AtSCL3; AltName: Full=GRAS family protein 5; Short=AtGRAS-5 && PF03514:GRAS domain family	GRAS
TraesCS3B03G1501900	TraesCS3B02G600900	39.3303	32.2659	28.1898	97.4204	115.65	82.2644	33.262	98.445	-1.56056	1.96555e-06	0.000525973	3B	PF04720:PDDEXK-like family of unknown function	-
TraesCS3B03G1510300	TraesCS3B02G611800	231.707	204.687	277.871	458.083	373.798	919.127	238.088	583.669	-1.29385	0.000150145	0.0163144	3B	Q9LFF9.1 RecName: Full=Soluble inorganic pyrophosphatase 4; AltName: Full=Pyrophosphate phospho-hydrolase 4; Short=PPase 4 && PF00719:Inorganic pyrophosphatase	Pyrophosphatase
TraesCS3D03G0043600	TraesCS3D02G024500	106.876	106.881	161.085	321.28	213.746	467.181	124.947	334.069	-1.41999	1.92704e-05	0.00331223	3D	Q5NDE4.1 RecName: Full=Protein O-linked-mannose beta-1,4-N-acetylglucosaminyltransferase 2; Short=POMGnT2; AltName: Full=Extracellular O-linked N-acetylglucosamine transferase-like; AltName: Full=Glycosyltransferase-like domain-containing protein 2 && PF04577:Protein of unknown function (DUF563)	-
TraesCS3D03G0055900	TraesCS3D02G031100	24.7952	18.1496	52.3525	229.042	84.6724	172.654	31.7658	162.123	-2.35445	5.55766e-07	0.000183207	3D	Q9AR73.1 RecName: Full=Hydroquinone glucosyltransferase; AltName: Full=Arbutin synthase && PF00201:UDP-glucoronosyl and UDP-glucosyl transferase	UDPGT
TraesCS3D03G0090200	TraesCS3D02G050700	135.091	159.313	269.817	667.433	273.636	759.676	188.074	566.915	-1.59284	5.15703e-05	0.00712348	3D	Q94F40.1 RecName: Full=GDSL esterase/lipase At1g28600; AltName: Full=Extracellular lipase At1g28600; Flags: Precursor && PF00657:GDSL-like Lipase/Acylhydrolase	Lipase_GDSL
TraesCS3D03G0185400	TraesCS3D02G093700	11.9701	5.04155	12.0813	42.4919	68.1509	29.4527	9.69766	46.6985	-2.26015	3.61676e-05	0.00538858	3D	Q76BW5.1 RecName: Full=Xyloglucan endotransglycosylase/hydrolase protein 8; AltName: Full=End-xyloglucan transferase; AltName: Full=OsXRT5; AltName: Full=OsXTH8; Flags: Precursor && PF06955:Xyloglucan endo-transglycosylase (XET) C-terminus|PF00722:Glycosyl hydrolases family 16	-
TraesCS3D03G0185900	TraesCS3D02G093900	90.6307	50.4155	173.166	320.244	321.135	254.918	104.737	298.766	-1.513	0.000110941	0.0130073	3D	Q76BW5.1 RecName: Full=Xyloglucan endotransglycosylase/hydrolase protein 8; AltName: Full=End-xyloglucan transferase; AltName: Full=OsXRT5; AltName: Full=OsXTH8; Flags: Precursor && PF00722:Glycosyl hydrolases family 16|PF06955:Xyloglucan endo-transglycosylase (XET) C-terminus	-
TraesCS3D03G0261200	TraesCS3D02G124500	300.962	232.92	293.979	123.33	59.8902	122.889	275.954	102.036	1.43553	4.73769e-06	0.00108122	3D	Q3I410.1 RecName: Full=Gibberellin 3-beta-dioxygenase 2-2; AltName: Full=Gibberellin 3 beta-hydroxylase 2-2; AltName: Full=Gibberellin 3-oxidase 2-2 && PF14226:non-haem dioxygenase in morphine synthesis N-terminal|PF03171:2OG-Fe(II) oxygenase superfamily	2OG-FeII_Oxy
TraesCS3D03G0274800	TraesCS3D02G130200	10.2601	10.0831	11.0746	45.601	18.5866	67.0303	10.4726	43.7393	-2.06332	0.000311675	0.0290543	3D	Q9SSR1.1 RecName: Full=DCC family protein At1g52590, chloroplastic; Flags: Precursor && PF04134:Protein of unknown function, DUF393	-
TraesCS3D03G0315300	TraesCS3D02G148500	96.6157	100.831	139.942	336.826	182.768	556.554	112.463	358.716	-1.67436	1.27662e-05	0.00237364	3D	PF02298:Plastocyanin-like domain	Cu_bind_like
TraesCS3D03G0316800	TraesCS3D02G149600	0	0	1.00678	24.8733	3.09777	32.4995	0.335593	20.1569	-5.88255	7.39587e-05	0.00957631	3D	Q9SQ80.1 RecName: Full=Gibberellin 2-beta-dioxygenase 1; AltName: Full=GA 2-oxidase 1; AltName: Full=Gibberellin 2-beta-hydroxylase 1; AltName: Full=Gibberellin 2-oxidase 1; AltName: Full=Protein SLENDER && PF14226:non-haem dioxygenase in morphine synthesis N-terminal|PF03171:2OG-Fe(II) oxygenase superfamily	2OG-FeII_Oxy
TraesCS3D03G0332500	TraesCS3D02G156500	488.209	561.628	734.949	1827.15	653.629	2318.64	594.929	1599.81	-1.42733	0.00026248	0.0254777	3D	Q9ZQ80.1 RecName: Full=Nodulin-related protein 1; Short=AtNRP1; AltName: Full=RPS2-interacting protein 11 && -	-
TraesCS3D03G0347400	TraesCS3D02G162500	158.176	106.881	132.895	403.155	283.962	381.869	132.651	356.329	-1.42343	2.83384e-08	1.47613e-05	3D	Q07469.1 RecName: Full=Bark storage protein A; Flags: Precursor [Populus deltoides] && PF01048:Phosphorylase superfamily	-
TraesCS3D03G0602700	TraesCS3D02G258300	5.13004	3.02493	2.01356	57.0013	4.13036	111.717	3.38951	57.6163	-4.07261	9.8e-06	0.00191064	3D	Q9FWX7.1 RecName: Full=ABC transporter B family member 11; Short=ABC transporter ABCB.11; Short=AtABCB11; AltName: Full=Multidrug resistance protein 8; AltName: Full=P-glycoprotein 11 && PF00005:ABC transporter|PF00664:ABC transporter transmembrane region|PF07673:Protein of unknown function (DUF1602)	ABC_membrane
TraesCS3D03G0611700	TraesCS3D02G263800	57.2854	49.4072	71.4813	177.222	91.9005	161.482	59.3913	143.535	-1.27361	0.00017298	0.0182719	3D	-	-
TraesCS3D03G0655300	TraesCS3D02G284500	32.4902	33.2742	57.3864	212.459	68.1509	203.122	41.0503	161.244	-1.97622	1.28897e-05	0.00238362	3D	Q94BM7.1 RecName: Full=Protein SPA1-RELATED 4 && -	-
TraesCS3D03G0687800	TraesCS3D02G300700	64.9805	47.3905	73.4949	288.116	248.854	210.231	61.9553	249.067	-2.00609	3.11546e-13	5.74629e-10	3D	Q50228.1 RecName: Full=Formamidase; AltName: Full=Formamide amidohydrolase && PF03069:Acetamidase/Formamidase family	FmdA_AmdA
TraesCS3D03G0704700	TraesCS3D02G309700	34.2003	32.2659	44.2983	423.882	79.5094	313.824	36.9215	272.405	-2.88398	7.84959e-09	4.74202e-06	3D	PF03126:Plus-3 domain	-
TraesCS3D03G0758800	TraesCS3D02G339300	2.56502	6.04986	3.02034	180.331	14.4563	180.779	3.8784	125.189	-5.02406	3.59592e-10	3.02932e-07	3D	-	-
TraesCS3D03G0768200	TraesCS3D02G345100	493.339	502.138	749.044	1659.26	674.281	1947.94	581.507	1427.16	-1.2955	0.000362956	0.0324175	3D	Q9SIZ6.1 RecName: Full=GDSL esterase/lipase At2g40250; AltName: Full=Extracellular lipase At2g40250; Flags: Precursor && PF00657:GDSL-like Lipase/Acylhydrolase	Lipase_GDSL
TraesCS3D03G0789000	TraesCS3D02G355900	43.6053	45.3739	81.5491	158.567	118.748	128.983	56.8428	135.433	-1.25598	0.000174351	0.0183883	3D	Q5N9N2.1 RecName: Full=Probable protein phosphatase 2C 9; Short=OsPP2C09 && PF00481:Protein phosphatase 2C	PP2C
TraesCS3D03G0796000	TraesCS3D02G358700	17.9551	27.2244	92.6237	640.487	168.312	437.728	45.9344	415.509	-3.17904	0.000189806	0.0196239	3D	Q9SR77.1 RecName: Full=Heme-binding-like protein At3g10130, chloroplastic; Flags: Precursor && PF04832:SOUL heme-binding protein	-
TraesCS3D03G0859500	TraesCS3D02G388700	64.1255	99.8226	145.983	21.7641	45.434	14.2185	103.31	27.1389	1.9275	6.05693e-05	0.00811998	3D	Q8H102.1 RecName: Full=Transcription factor bHLH128; AltName: Full=Basic helix-loop-helix protein 128; Short=AtbHLH128; Short=bHLH 128; AltName: Full=Transcription factor EN 74; AltName: Full=bHLH transcription factor bHLH128 && PF00010:Helix-loop-helix DNA-binding domain	HLH
TraesCS3D03G0884400	TraesCS3D02G401400	316.352	356.942	412.779	43.5283	98.096	26.4059	362.024	56.0101	2.69265	2.74767e-11	3.12488e-08	3D	Q0JH50.1 RecName: Full=Gibberellin 20 oxidase 2; AltName: Full=GA 20-oxidase 2; AltName: Full=Gibberellin C-20 oxidase 2; AltName: Full=Os20ox2; AltName: Full=Protein semidwarf-1 >P0C5H5.1 RecName: Full=Gibberellin 20 oxidase 2; AltName: Full=GA 20-oxidase 2; AltName: Full=Gibberellin C-20 oxidase 2; AltName: Full=Os20ox2; AltName: Full=Protein semidwarf-1 && PF03171:2OG-Fe(II) oxygenase superfam…	2OG-FeII_Oxy
TraesCS3D03G0915800	TraesCS3D02G417600	11.1151	12.0997	30.2034	185.513	29.9451	211.247	17.8061	142.235	-3.00288	2.15131e-06	0.000563385	3D	Q84MB3.1 RecName: Full=1-aminocyclopropane-1-carboxylate oxidase homolog 1 && PF03171:2OG-Fe(II) oxygenase superfamily|PF14226:non-haem dioxygenase in morphine synthesis N-terminal	2OG-FeII_Oxy
TraesCS3D03G1000600	TraesCS3D02G454600	88.9207	100.831	104.705	38.3463	32.0103	32.4995	98.1522	34.2854	1.51645	8.81397e-07	0.000270918	3D	-	-
TraesCS3D03G1061200	TraesCS3D02G480100	10.2601	3.02493	16.1085	0	0	0	9.79782	0	5.69555	0.000337559	0.0308354	3D	B9EXZ6.1 RecName: Full=Amino-acid permease BAT1 homolog && PF13520:Amino acid permease	-
TraesCS3D03G1067000	TraesCS3D02G482600	142.786	99.8226	159.071	35.2372	65.0532	66.0147	133.893	55.435	1.27225	0.000233379	0.0229799	3D	Q9LPR8.1 RecName: Full=Scarecrow-like protein 3; Short=AtSCL3; AltName: Full=GRAS family protein 5; Short=AtGRAS-5 && PF03514:GRAS domain family	GRAS
TraesCS3D03G1140100	TraesCS3D02G515400	5.98504	14.1163	5.03389	61.1468	18.5866	51.7961	8.37842	43.8432	-2.39557	0.000140321	0.0155947	3D	Q7XA40.2 RecName: Full=Putative disease resistance protein RGA3; AltName: Full=Blight resistance protein B149; AltName: Full=RGA1-blb && PF00931:NB-ARC domain	NB-ARC
TraesCS3D03G1158300	TraesCS3D02G523200	0.855006	0	0	47.6738	8.26072	37.5776	0.285002	31.1707	-6.51116	2.73902e-06	0.000679645	3D	Q07346.1 RecName: Full=Glutamate decarboxylase; Short=GAD && PF00282:Pyridoxal-dependent decarboxylase conserved domain	-
TraesCS3D03G1159500	TraesCS3D02G523900	5.98504	7.05817	6.04067	65.2924	10.3259	64.9991	6.3613	46.8724	-2.88319	4.44422e-05	0.00631793	3D	-	-
TraesCS3D03G1180200	TraesCS3D02G534100	2.56502	7.05817	4.02712	45.601	5.16295	83.28	4.5501	44.6813	-3.30768	0.000121276	0.0139789	3D	Q39119.2 RecName: Full=Vacuolar-processing enzyme gamma-isozyme; AltName: Full=Asparaginyl endopeptidase gamma-VPE; AltName: Full=Gamma-VPE; Flags: Precursor && PF01650:Peptidase C13 family	-
TraesCS3D03G1190100	TraesCS3D02G539900	74.3856	71.59	99.6711	149.24	139.4	381.869	81.8822	223.503	-1.44957	0.000388017	0.0342022	3D	Q9LFF9.1 RecName: Full=Soluble inorganic pyrophosphatase 4; AltName: Full=Pyrophosphate phospho-hydrolase 4; Short=PPase 4 && PF00719:Inorganic pyrophosphatase	Pyrophosphatase
TraesCS4A03G0008700	TraesCS4A02G005500	21.3752	49.4072	59.4	8.2911	9.29331	2.03122	43.3941	6.53854	2.7293	2.3441e-05	0.00382666	4A	Q8H0T5.1 RecName: Full=Ethylene-responsive transcription factor ERF073 && PF00847:AP2 domain	AP2
TraesCS4A03G0013400	TraesCS4A02G007800	14.5351	12.0997	12.0813	36.2735	69.1835	44.6869	12.9054	50.048	-1.95129	2.7764e-05	0.00436529	4A	Q10QW3.1 RecName: Full=Protein TIFY 11b; Short=OsTIFY11b; AltName: Full=Jasmonate ZIM domain-containing protein 10; Short=OsJAZ10; AltName: Full=OsJAZ4 && PF09425:Divergent CCT motif|PF06200:tify domain	Zim
TraesCS4A03G0020700	TraesCS4A02G012300	6.84005	3.02493	22.1491	69.4379	23.7496	124.92	10.6714	72.7025	-2.7746	9.55399e-05	0.0116451	4A	Q53QK0.1 RecName: Full=Flavonoid O-methyltransferase-like protein Os11g0303600 && PF08100:Dimerisation domain|PF00891:O-methyltransferase	-
TraesCS4A03G0026800	TraesCS4A02G016000	47.8804	42.349	46.3118	135.767	121.846	84.2957	45.5137	113.969	-1.32283	2.61879e-05	0.00415578	4A	Q10R47.1 RecName: Full=Transcription factor ILI3; Short=OsILI3; AltName: Full=Basic helix-loop-helix protein 153; Short=OsbHLH153; AltName: Full=Protein INCREASED LEAF INCLINATION 3; AltName: Full=bHLH transcription factor bHLH153 >A2XD15.1 RecName: Full=Transcription factor ILI3; AltName: Full=Basic helix-loop-helix protein 153; AltName: Full=Protein INCREASED LEAF INCLINATION 3; AltName: Full=b…	-
TraesCS4A03G0119200	TraesCS4A02G059900	256.502	222.836	241.627	670.542	344.885	461.087	240.322	492.172	-1.03378	0.000181703	0.0189585	4A	O48651.1 RecName: Full=Squalene monooxygenase; AltName: Full=Squalene epoxidase; Short=SE && PF08491:Squalene epoxidase	-
TraesCS4A03G0126400	TraesCS4A02G063600	0	0	9.06101	597.995	53.6947	478.352	3.02034	376.681	-6.97017	0.000622785	0.0489597	4A	P14895.1 RecName: Full=High molecular mass early light-inducible protein HV58, chloroplastic; Short=ELIP; Flags: Precursor && PF00504:Chlorophyll A-B binding protein	-
TraesCS4A03G0133800	TraesCS4A02G067500	2.56502	2.01662	0	36.2735	7.22813	15.2342	1.52721	19.5786	-3.64897	0.000388292	0.0342022	4A	P14895.1 RecName: Full=High molecular mass early light-inducible protein HV58, chloroplastic; Short=ELIP; Flags: Precursor && -	-
TraesCS4A03G0148700	TraesCS4A02G073800	610.475	438.615	689.644	2493.55	755.856	2678.16	579.578	1975.86	-1.76936	1.10518e-05	0.00209484	4A	Q8H129.1 RecName: Full=Purple acid phosphatase 3; Flags: Precursor && PF00149:Calcineurin-like phosphoesterase	Metallophos
TraesCS4A03G0153700	TraesCS4A02G075600	16.2451	14.1163	28.1898	58.0377	36.1406	137.107	19.5171	77.0952	-1.98505	0.000272017	0.0260415	4A	Q42521.2 RecName: Full=Glutamate decarboxylase 1; Short=GAD 1 && PF00282:Pyridoxal-dependent decarboxylase conserved domain	-
TraesCS4A03G0197900	TraesCS4A02G096100	240.257	245.019	344.318	104.675	170.377	97.4986	276.531	124.184	1.15459	0.000115159	0.0133947	4A	-	-
TraesCS4A03G0201600	TraesCS4A02G097400	19.6651	46.3822	25.1695	75.6563	127.009	73.1239	30.4056	91.9296	-1.6023	0.000165487	0.0176995	4A	P42390.2 RecName: Full=Indole-3-glycerol phosphate lyase, chloroplastic; AltName: Full=Benzoxazineless 1; AltName: Full=Indole synthase; AltName: Full=Tryptophan synthase alpha chain; Flags: Precursor && PF00290:Tryptophan synthase alpha chain	-
TraesCS4A03G0201700	TraesCS4A02G097500	50.4454	59.4903	62.4203	323.353	394.449	333.12	57.452	350.307	-2.61145	1.55847e-27	2.65864e-23	4A	Q43257.1 RecName: Full=indole-2-monooxygenase; AltName: Full=Cytochrome P450 71C4; AltName: Full=Protein benzoxazineless 2 && PF00067:Cytochrome P450	p450
TraesCS4A03G0220600	TraesCS4A02G107100	596.794	635.235	817.505	2075.88	844.659	1903.25	683.178	1607.93	-1.23506	0.000155676	0.0168084	4A	P68178.1 RecName: Full=Salt stress-induced hydrophobic peptide ESI3 >P68179.1 RecName: Full=Low temperature-induced protein lt101.1; AltName: Full=Blt101.1; Short=Blt101 && PF01679:Proteolipid membrane potential modulator	-
TraesCS4A03G0226500	TraesCS4A02G109300	45.3153	16.133	40.2712	173.077	66.0858	118.826	33.9065	119.33	-1.81084	0.000104125	0.0124	4A	P48621.1 RecName: Full=Omega-3 fatty acid desaturase, chloroplastic; Flags: Precursor && PF00487:Fatty acid desaturase|PF11960:Domain of unknown function (DUF3474)	-
TraesCS4A03G0227300	TraesCS4A02G109900	1053.37	1209.97	1689.38	3712.34	2632.07	4160.96	1317.57	3501.79	-1.41045	4.67203e-08	2.31018e-05	4A	Q10MX3.1 RecName: Full=Asparagine synthetase [glutamine-hydrolyzing] 1; AltName: Full=Glutamine-dependent asparagine synthetase 1 && PF00733:Asparagine synthase|PF13537:Glutamine amidotransferase domain	-
TraesCS4A03G0243900	TraesCS4A02G119000	4.27503	18.1496	10.0678	77.729	22.717	75.1552	10.8308	58.5337	-2.44761	9.03527e-05	0.0111088	4A	PF04667:cAMP-regulated phosphoprotein/endosulfine conserved region	-
TraesCS4A03G0261900	TraesCS4A02G125500	95.7607	93.7728	135.915	530.63	170.377	664.209	108.483	455.072	-2.06927	1.28066e-06	0.000375057	4A	Q9LZ98.1 RecName: Full=ABC transporter I family member 20; Short=ABC transporter ABCI.20; Short=AtABCI20; AltName: Full=GCN-related protein 3; AltName: Full=Non-intrinsic ABC protein 9 && PF00005:ABC transporter	ABC_tran
TraesCS4A03G0470000	TraesCS4A02G172000	43.6053	40.3324	52.3525	165.822	124.943	187.888	45.4301	159.551	-1.81335	1.09442e-09	7.94465e-07	4A	Q8L6H7.1 RecName: Full=Beta-glucosidase-like SFR2, chloroplastic; AltName: Full=Beta-glucosidase 36; Short=Os11bglu36; AltName: Full=Protein SENSITIVE TO FREEZING 2; Short=OsSFR2 && PF00232:Glycosyl hydrolase family 1	Glyco_hydro_1
TraesCS4A03G0489200	TraesCS4A02G179500	88.9207	95.7894	164.105	238.369	226.137	357.495	116.272	274	-1.23874	0.000119107	0.0137754	4A	Q69LA1.1 RecName: Full=Probable proline transporter 2 && PF01490:Transmembrane amino acid transporter protein	Aa_trans
TraesCS4A03G0506100	TraesCS4A02G187600	62.4155	54.4487	64.4339	148.203	165.214	88.3581	60.4327	133.925	-1.1472	0.00039289	0.0343772	4A	Q94BZ1.1 RecName: Full=Protein ZINC INDUCED FACILITATOR-LIKE 1; AltName: Full=Protein ZIF-LIKE 1 && PF07690:Major Facilitator Superfamily	MFS_1
TraesCS4A03G0509600	TraesCS4A02G189700	18.8101	21.1745	73.4949	191.732	79.5094	142.185	37.8265	137.809	-1.86981	0.00040119	0.0349184	4A	P81392.1 RecName: Full=Myb-related protein 306 && PF00249:Myb-like DNA-binding domain	Myb_DNA-binding
TraesCS4A03G0511200	TraesCS4A02G190700	146.206	79.6565	61.4135	23.8369	23.7496	7.10927	95.7587	18.2319	2.39687	2.36804e-06	0.00060294	4A	P83304.1 RecName: Full=Mannose/glucose-specific lectin && PF03018:Dirigent-like protein|PF01419:Jacalin-like lectin domain	-
TraesCS4A03G0518500	TraesCS4A02G193600	19.6651	19.1579	58.3932	240.442	78.4768	258.981	32.4054	192.633	-2.5758	1.00577e-06	0.000303676	4A	Q9SHB5.1 RecName: Full=WRKY transcription factor 55; AltName: Full=WRKY DNA-binding protein 55 && PF03106:WRKY DNA -binding domain	WRKY
TraesCS4A03G0534300	TraesCS4A02G199700	254.792	264.177	508.423	780.399	516.295	1211.62	342.464	836.106	-1.28834	0.000418857	0.036271	4A	Q9SJ54.1 RecName: Full=NDR1/HIN1-like protein 12 && PF03168:Late embryogenesis abundant protein	-
TraesCS4A03G0607500	TraesCS4A02G229100	173.566	255.102	234.58	135.767	103.259	87.3425	221.083	108.789	1.02204	0.000263194	0.0255108	4A	-	-
TraesCS4A03G0632600	TraesCS4A02G239800	53.0104	60.4986	53.3593	19.6914	24.7822	15.2342	55.6228	19.9026	1.48279	0.000162624	0.0174207	4A	-	-
TraesCS4A03G0646200	TraesCS4A02G245100	1296.19	878.238	1870.6	213.496	212.714	78.202	1348.34	168.137	3.00372	1.06269e-14	2.90059e-11	4A	O22611.1 RecName: Full=Dormancy-associated protein 1; Short=PsDRM1 && PF05564:Dormancy/auxin associated protein	-
TraesCS4A03G0713600	TraesCS4A02G277000	26.5052	24.1994	40.2712	496.429	215.811	342.261	30.3253	351.5	-3.53758	1.48671e-21	7.80375e-18	4A	PF14861:Plant antimicrobial peptide	-
TraesCS4A03G0800900	TraesCS4A02G321300	217.172	164.354	251.695	104.675	129.074	71.0927	211.074	101.614	1.05517	0.000526787	0.0432568	4A	Q8RY59.1 RecName: Full=Inactive poly [ADP-ribose] polymerase RCD1; AltName: Full=Protein RADICAL-INDUCED CELL DEATH 1 && PF12174:RCD1-SRO-TAF4 (RST) plant domain	-
TraesCS4A03G0828300	TraesCS4A02G333800	212.897	241.994	325.19	782.472	462.6	862.253	260.027	702.442	-1.43458	8.37642e-07	0.000260996	4A	Q92503.2 RecName: Full=SEC14-like protein 1 && PF00650:CRAL/TRIO domain	-
TraesCS4A03G0902500	TraesCS4A02G366000	51.3004	53.4404	70.4745	125.403	129.074	204.138	58.4051	152.871	-1.39042	1.20005e-05	0.00225586	4A	O31581.1 RecName: Full=AB hydrolase superfamily protein YfhM && PF12697:Alpha/beta hydrolase family	-
TraesCS4A03G1071100	TraesCS4A02G431400	94.9057	72.5983	64.4339	283.97	161.084	327.027	77.3126	257.36	-1.73247	1.25268e-07	5.18055e-05	4A	PF03018:Dirigent-like protein|PF01419:Jacalin-like lectin domain	-
TraesCS4A03G1102400	TraesCS4A02G442400	82.0806	43.3573	44.2983	175.149	166.247	157.42	56.5787	166.272	-1.54778	1.38754e-06	0.000399501	4A	Q9XGP7.1 RecName: Full=Tricin synthase 1; AltName: Full=Caffeoyl-CoA 3-O-methyltransferase ROMT15 && PF01596:O-methyltransferase	-
TraesCS4A03G1115000	TraesCS4A02G445000	30.7802	38.3158	23.1559	76.6926	86.7375	56.8742	30.7506	73.4348	-1.25558	0.000640431	0.0499441	4A	Q9FM04.3 RecName: Full=GDSL esterase/lipase At5g62930 && PF00657:GDSL-like Lipase/Acylhydrolase	Lipase_GDSL
TraesCS4A03G1138700	TraesCS4A02G455000	53.0104	69.5734	46.3118	22.8005	16.5214	15.2342	56.2985	18.1854	1.63024	8.07047e-05	0.0102049	4A	Q06398.2 RecName: Full=Probable glutathione S-transferase GSTU6; AltName: Full=28 kDa cold-induced protein && PF13410:Glutathione S-transferase, C-terminal domain|PF13417:Glutathione S-transferase, N-terminal domain	-
TraesCS4A03G1158000	TraesCS4A02G460100	25.6502	21.1745	29.1966	123.33	37.1732	113.748	25.3404	91.4172	-1.8509	0.000104442	0.0124161	4A	Q9AXH9.1 RecName: Full=Ent-kaurenoic acid oxidase 1; AltName: Full=gpr5 && PF00067:Cytochrome P450	p450
TraesCS4A03G1224300	TraesCS4A02G485900	258.212	178.471	202.363	606.286	518.36	575.851	213.015	566.833	-1.40993	1.45566e-10	1.419e-07	4A	Q9FSV7.1 RecName: Full=Sucrose:sucrose 1-fructosyltransferase; AltName: Full=Sucrose 1(F)-fructosyltransferase; AltName: Full=Sucrose:sucrose 1(F)-beta-D-fructosyltransferase; Flags: Precursor && PF00251:Glycosyl hydrolases family 32 N-terminal domain|PF11837:Domain of unknown function (DUF3357)|PF08244:Glycosyl hydrolases family 32 C terminal	-
TraesCS4B03G0005100	TraesCS4B02G003400	48.7354	47.3905	45.3051	140.949	87.7701	151.326	47.1437	126.682	-1.42557	8.67547e-06	0.00173263	4B	Q6RVV4.1 RecName: Full=Short-chain dehydrogenase TIC 32, chloroplastic; AltName: Full=Translocon at the inner envelope membrane of chloroplasts 32; Short=PsTIC32 && PF00106:short chain dehydrogenase	adh_short
TraesCS4B03G0050900	TraesCS4B02G024100	45.3153	107.889	104.705	11.4003	33.0429	26.4059	85.9698	23.6163	1.86101	0.000141331	0.0156813	4B	F8RP11.1 RecName: Full=Hsp70-Hsp90 organizing protein; Short=TaHop && PF12796:Ankyrin repeats (3 copies)|PF13414:TPR repeat	-
TraesCS4B03G0093100	TraesCS4B02G043100	8738.17	7196.31	9957.04	2371.25	2162.24	2279.03	8630.5	2270.84	1.92622	5.03758e-25	4.91071e-21	4B	Q9ST59.1 RecName: Full=DELLA protein RHT-1; AltName: Full=Protein Rht-B1/Rht-D1; AltName: Full=Reduced height protein 1 && PF03514:GRAS domain family|PF12041:Transcriptional regulator DELLA protein N terminal	GRAS
TraesCS4B03G0110000	TraesCS4B02G050800	59.8504	95.7894	107.725	25.9097	24.7822	16.2498	87.7884	22.3139	1.97417	6.73816e-07	0.000214856	4B	A2XLF4.1 RecName: Full=Zinc-finger homeodomain protein 11 >Q10DV5.1 RecName: Full=Zinc-finger homeodomain protein 11; Short=OsZHD11 && PF04770:ZF-HD protein dimerisation region	ZF-HD_dimer
TraesCS4B03G0128700	TraesCS4B02G059300	0	1.00831	0	19.6914	13.4237	36.562	0.336103	23.2257	-6.08724	7.65073e-06	0.00157723	4B	P30110.1 RecName: Full=Glutathione S-transferase 1; AltName: Full=GST class-phi && PF00043:Glutathione S-transferase, C-terminal domain|PF02798:Glutathione S-transferase, N-terminal domain	GST_N
TraesCS4B03G0155100	TraesCS4B02G070300	899.467	656.41	1324.92	233.187	173.475	108.67	960.266	171.777	2.48308	2.20033e-13	4.416e-10	4B	O22611.1 RecName: Full=Dormancy-associated protein 1; Short=PsDRM1 && PF05564:Dormancy/auxin associated protein	-
TraesCS4B03G0168800	TraesCS4B02G075200	32.4902	38.3158	40.2712	12.4366	12.3911	8.12488	37.0257	10.9842	1.75233	0.000270122	0.0260415	4B	-	-
TraesCS4B03G0184500	TraesCS4B02G081200	32.4902	53.4404	47.3186	18.655	8.26072	6.09366	44.4164	11.0031	2.0124	0.000172013	0.0181979	4B	Q39112.1 RecName: Full=Gibberellin 20 oxidase 3; AltName: Full=GA 20-oxidase 3; AltName: Full=Gibberellin C-20 oxidase 3 && PF14226:non-haem dioxygenase in morphine synthesis N-terminal|PF03171:2OG-Fe(II) oxygenase superfamily	2OG-FeII_Oxy
TraesCS4B03G0239000	TraesCS4B02G105300	152.191	147.213	143.969	1176.3	289.125	807.41	147.791	757.612	-2.35777	9.12818e-09	5.27864e-06	4B	Q9FLP9.1 RecName: Full=GDP-L-galactose phosphorylase 2; AltName: Full=Protein VITAMIN C DEFECTIVE 5 && -	-
TraesCS4B03G0307700	TraesCS4B02G131500	79.5156	71.59	93.6304	594.886	437.818	389.994	81.5787	474.233	-2.53965	1.07223e-22	6.09713e-19	4B	Q94BZ1.1 RecName: Full=Protein ZINC INDUCED FACILITATOR-LIKE 1; AltName: Full=Protein ZIF-LIKE 1 && PF07690:Major Facilitator Superfamily	MFS_1
TraesCS4B03G0308400	TraesCS4B02G131000	205.202	234.936	305.054	617.687	444.014	567.726	248.397	543.142	-1.12987	3.12457e-06	0.000756067	4B	Q2QY53.2 RecName: Full=CBL-interacting protein kinase 32; AltName: Full=OsCIPK32 && PF03822:NAF domain|PF00069:Protein kinase domain	Pkinase
TraesCS4B03G0504200	TraesCS4B02G179200	153.046	137.13	146.99	666.397	239.561	906.94	145.722	604.299	-2.05189	3.28587e-07	0.00011678	4B	Q9LZ98.1 RecName: Full=ABC transporter I family member 20; Short=ABC transporter ABCI.20; Short=AtABCI20; AltName: Full=GCN-related protein 3; AltName: Full=Non-intrinsic ABC protein 9 && PF00005:ABC transporter	ABC_tran
TraesCS4B03G0544200	TraesCS4B02G194400	2016.11	1350.13	1906.84	5538.45	2847.88	3920.26	1757.69	4102.2	-1.2226	1.30768e-05	0.00240517	4B	Q10MX3.1 RecName: Full=Asparagine synthetase [glutamine-hydrolyzing] 1; AltName: Full=Glutamine-dependent asparagine synthetase 1 && PF13537:Glutamine amidotransferase domain|PF00733:Asparagine synthase	-
TraesCS4B03G0617100	TraesCS4B02G224800	0	1.00831	1.00678	385.536	30.9777	540.305	0.671696	318.939	-8.95793	3.07421e-13	5.74629e-10	4B	P14895.1 RecName: Full=High molecular mass early light-inducible protein HV58, chloroplastic; Short=ELIP; Flags: Precursor && PF00504:Chlorophyll A-B binding protein	-
TraesCS4B03G0655700	TraesCS4B02G240700	0	0	0	272.57	33.0429	344.292	0	216.635	-10.2699	1.8811e-08	1.01873e-05	4B	P14895.1 RecName: Full=High molecular mass early light-inducible protein HV58, chloroplastic; Short=ELIP; Flags: Precursor && PF00504:Chlorophyll A-B binding protein	-
TraesCS4B03G0700700	TraesCS4B02G263000	36.7653	28.2327	47.3186	107.784	98.096	114.764	37.4389	106.881	-1.51387	1.97417e-06	0.000526217	4B	Q12063.1 RecName: Full=Dehydrodolichyl diphosphate synthase complex subunit NUS1; AltName: Full=Di-trans,poly-cis-decaprenylcistransferase; AltName: Full=Nuclear undecaprenyl pyrophosphate synthase 1; AltName: Full=Undecaprenyl diphosphate synthase; Short=UDS && -	-
TraesCS4B03G0741800	TraesCS4B02G280100	100.036	164.354	303.04	698.525	500.806	512.883	189.144	570.738	-1.59516	1.448e-05	0.00263486	4B	Q9ZVJ6.1 RecName: Full=Annexin D4; AltName: Full=AnnAt4 && PF00191:Annexin	-
TraesCS4B03G0882600	TraesCS4B02G339300	0	0	5.03389	27.9825	21.6844	23.359	1.67796	24.342	-3.90966	3.65997e-05	0.00544108	4B	Q9FJ25.1 RecName: Full=GDSL esterase/lipase At5g41890 && PF00657:GDSL-like Lipase/Acylhydrolase	Lipase_GDSL
TraesCS4B03G0885700	TraesCS4B02G341600	50.4454	63.5235	129.874	936.894	215.811	1354.82	81.2811	835.843	-3.36298	2.59247e-05	0.00413324	4B	Q9FMY1.1 RecName: Full=Cytochrome P450 86B1 && PF00067:Cytochrome P450	p450
TraesCS4B03G0886000	TraesCS4B02G341800	29.9252	24.1994	121.82	353.408	210.648	296.558	58.6483	286.872	-2.2933	8.9271e-06	0.00177081	4B	Q9FVS9.1 RecName: Full=Alkane hydroxylase MAH1; AltName: Full=Cytochrome P450 96A15; AltName: Full=Protein MID-CHAIN ALKANE HYDROXYLASE 1 && PF00067:Cytochrome P450	p450
TraesCS4B03G0886300	TraesCS4B02G341900	98.3257	65.5401	139.942	299.516	231.3	228.512	101.269	253.109	-1.32175	2.3189e-05	0.00381288	4B	Q9FVS9.1 RecName: Full=Alkane hydroxylase MAH1; AltName: Full=Cytochrome P450 96A15; AltName: Full=Protein MID-CHAIN ALKANE HYDROXYLASE 1 && PF00067:Cytochrome P450	p450
TraesCS4B03G0886800	TraesCS4B02G342000	52.1554	26.216	146.99	784.545	230.268	1076.55	75.1204	697.12	-3.21465	0.000306728	0.0286715	4B	Q9FMY1.1 RecName: Full=Cytochrome P450 86B1 && PF00067:Cytochrome P450	p450
TraesCS4B03G0906300	TraesCS4B02G348600	2930.96	1773.62	2231.02	7987.44	4018.84	10175.4	2311.87	7393.89	-1.67717	4.87994e-07	0.000164848	4B	Q5MAU8.1 RecName: Full=Probable inactive purple acid phosphatase 27; Flags: Precursor && PF14008:Iron/zinc purple acid phosphatase-like protein C|PF16656:Purple acid Phosphatase, N-terminal domain|PF00149:Calcineurin-like phosphoesterase	Metallophos
TraesCS4B03G0919000	TraesCS4B02G353900	8.55006	7.05817	8.05423	0	0	0	7.88749	0	5.38316	0.000555185	0.0452079	4B	A3BNA1.1 RecName: Full=Flowering-promoting factor 1-like protein 5; AltName: Full=FPF1-like protein 5 && -	-
TraesCS4B03G0925800	TraesCS4B02G356800	804.561	665.484	787.301	2151.54	1587.09	2977.77	752.449	2238.8	-1.57294	9.55408e-10	7.08632e-07	4B	A2X5P7.2 RecName: Full=Beta-fructofuranosidase, insoluble isoenzyme 1; AltName: Full=Cell wall beta-fructosidase 1; AltName: Full=Invertase 1; AltName: Full=OsCIN1; AltName: Full=Sucrose hydrolase 1; Flags: Precursor && PF00251:Glycosyl hydrolases family 32 N-terminal domain|PF08244:Glycosyl hydrolases family 32 C terminal	-
TraesCS4B03G1011700	TraesCS4B02G396400	35.9103	41.3407	66.4474	106.748	83.6398	257.965	47.8995	149.451	-1.64431	0.00033628	0.0307694	4B	D3UAG0.1 RecName: Full=UDP-glycosyltransferase 71K1; AltName: Full=UDP-glucose:chalcone 2'-O-glucosyltransferase; AltName: Full=UDP-glucose:flavonol 2'-O-glucosyltransferase && PF00201:UDP-glucoronosyl and UDP-glucosyl transferase	UDPGT
TraesCS4D03G0051700	TraesCS4D02G030800	10.2601	27.2244	32.2169	73.5835	42.3362	153.357	23.2338	89.7589	-1.95779	0.00039073	0.0342702	4D	P45851.1 RecName: Full=Oxalate oxidase 2; AltName: Full=Germin; Flags: Precursor && PF00190:Cupin	-
TraesCS4D03G0053300	TraesCS4D02G031700	23.0852	33.2742	55.3728	165.822	189.997	239.684	37.2441	198.501	-2.42169	9.15208e-12	1.17832e-08	4D	P15290.1 RecName: Full=Oxalate oxidase GF-2.8; AltName: Full=Germin GF-2.8; Flags: Precursor && PF00190:Cupin	-
TraesCS4D03G0118100	TraesCS4D02G063300	6.84005	9.07479	5.03389	37.3099	11.3585	83.28	6.98291	43.9828	-2.65616	0.000223178	0.0222646	4D	-	-
TraesCS4D03G0130800	TraesCS4D02G069100	400.998	295.435	813.477	120.221	66.0858	87.3425	503.303	91.2164	2.46388	2.70169e-10	2.45807e-07	4D	O22611.1 RecName: Full=Dormancy-associated protein 1; Short=PsDRM1 && PF05564:Dormancy/auxin associated protein	-
TraesCS4D03G0139800	TraesCS4D02G073600	111.151	197.629	272.837	918.239	339.722	1614.82	193.872	957.594	-2.30532	1.3287e-06	0.000387464	4D	Q53QK0.1 RecName: Full=Flavonoid O-methyltransferase-like protein Os11g0303600 && PF00891:O-methyltransferase|PF08100:Dimerisation domain	-
TraesCS4D03G0162500	TraesCS4D02G084600	149.626	263.169	291.966	104.675	115.65	63.9834	234.92	94.7695	1.30862	0.000134028	0.0150175	4D	-	-
TraesCS4D03G0179800	TraesCS4D02G091700	4.27503	12.0997	12.0813	37.3099	53.6947	23.359	9.48536	38.1212	-2.02212	0.000494536	0.0414566	4D	Q9LEQ3.1 RecName: Full=Cyclic nucleotide-gated ion channel 18; AltName: Full=Cyclic nucleotide- and calmodulin-regulated ion channel 18 && PF00520:Ion transport protein|PF00027:Cyclic nucleotide-binding domain	Ion_trans
TraesCS4D03G0202300	TraesCS4D02G102200	122.266	103.856	133.902	489.175	174.508	345.307	120.008	336.33	-1.4866	3.53424e-05	0.00528873	4D	Q9FLP9.1 RecName: Full=GDP-L-galactose phosphorylase 2; AltName: Full=Protein VITAMIN C DEFECTIVE 5 && -	-
TraesCS4D03G0204300	TraesCS4D02G103400	46.1703	32.2659	44.2983	2.07277	0	2.03122	40.9115	1.368	4.90125	1.29356e-08	7.23512e-06	4D	Q7XA40.2 RecName: Full=Putative disease resistance protein RGA3; AltName: Full=Blight resistance protein B149; AltName: Full=RGA1-blb && PF00931:NB-ARC domain	NB-ARC
TraesCS4D03G0239400	TraesCS4D02G119700	30.7802	16.133	81.5491	276.715	88.8027	253.903	42.8208	206.474	-2.27167	3.97494e-05	0.00580809	4D	Q9SHB5.1 RecName: Full=WRKY transcription factor 55; AltName: Full=WRKY DNA-binding protein 55 && PF03106:WRKY DNA -binding domain	WRKY
TraesCS4D03G0449800	TraesCS4D02G180700	108.586	85.7063	81.5491	534.776	144.563	697.724	91.9471	459.021	-2.31881	4.26765e-07	0.000146338	4D	Q9LZ98.1 RecName: Full=ABC transporter I family member 20; Short=ABC transporter ABCI.20; Short=AtABCI20; AltName: Full=GCN-related protein 3; AltName: Full=Non-intrinsic ABC protein 9 && PF00005:ABC transporter	ABC_tran
TraesCS4D03G0469000	TraesCS4D02G189800	16.2451	25.2077	35.2373	4.14555	5.16295	4.06244	25.5634	4.45698	2.51564	0.000180079	0.0188467	4D	P20144.1 RecName: Full=Wound-induced protein 1 && PF07107:Wound-induced protein WI12	-
TraesCS4D03G0480300	TraesCS4D02G194700	0.855006	5.04155	2.01356	47.6738	7.22813	30.4683	2.6367	28.4567	-3.45848	0.000124286	0.0141711	4D	Q40541.1 RecName: Full=Mitogen-activated protein kinase kinase kinase NPK1; AltName: Full=Nicotiana protein kinase 1 && PF00069:Protein kinase domain	Pkinase
TraesCS4D03G0507200	TraesCS4D02G207500	549.769	573.728	751.057	1714.18	924.168	1446.23	624.851	1361.53	-1.12391	2.96407e-05	0.00463898	4D	P09189.1 RecName: Full=Heat shock cognate 70 kDa protein && PF00012:Hsp70 protein|PF10712:NAD-specific glutamate dehydrogenase	HSP70
TraesCS4D03G0508400	TraesCS4D02G207800	494.194	414.415	322.169	1112.04	1518.94	1202.48	410.259	1277.82	-1.63817	2.82724e-12	4.28717e-09	4D	Q43257.1 RecName: Full=indole-2-monooxygenase; AltName: Full=Cytochrome P450 71C4; AltName: Full=Protein benzoxazineless 2 && PF00067:Cytochrome P450	p450
TraesCS4D03G0545100	TraesCS4D02G225400	7.69506	21.1745	27.183	1004.26	117.715	1398.5	18.6842	840.157	-5.49381	5.69601e-08	2.73718e-05	4D	P14895.1 RecName: Full=High molecular mass early light-inducible protein HV58, chloroplastic; Short=ELIP; Flags: Precursor && -	-
TraesCS4D03G0558200	TraesCS4D02G231400	208.622	132.089	203.369	479.847	236.463	564.679	181.36	426.997	-1.23473	0.000341087	0.0310745	4D	Q8H129.1 RecName: Full=Purple acid phosphatase 3; Flags: Precursor && PF00149:Calcineurin-like phosphoesterase	Metallophos
TraesCS4D03G0579800	TraesCS4D02G240400	0	0	1.00678	190.695	14.4563	259.996	0.335593	155.049	-8.82558	8.7895e-07	0.000270918	4D	P14895.1 RecName: Full=High molecular mass early light-inducible protein HV58, chloroplastic; Short=ELIP; Flags: Precursor && PF00504:Chlorophyll A-B binding protein	-
TraesCS4D03G0625800	TraesCS4D02G262500	31.6352	46.3822	68.461	12.4366	15.4888	17.2654	48.8261	15.0636	1.6922	0.00036718	0.0327092	4D	Q9LVQ7.1 RecName: Full=Protein indeterminate-domain 1; AltName: Full=Protein ENHYDROUS && -	-
TraesCS4D03G0626800	TraesCS4D02G263100	44.4603	56.4653	53.3593	171.004	111.52	145.232	51.4283	142.585	-1.47399	7.52766e-07	0.000236712	4D	-	-
TraesCS4D03G0641800	TraesCS4D02G270000	49.5904	33.2742	73.4949	116.075	110.487	127.967	52.1198	118.176	-1.18184	0.00052397	0.0431292	4D	Q6F6Y2.1 RecName: Full=FAD-dependent urate hydroxylase; AltName: Full=Flavoprotein urate hydroxylase && PF01494:FAD binding domain	FAD_binding_3
TraesCS4D03G0746900	TraesCS4D02G320300	5.13004	7.05817	13.0881	31.0916	26.8473	47.7337	8.42544	35.2242	-2.07699	0.000243827	0.0238709	4D	Q08632.1 RecName: Full=Short-chain type dehydrogenase/reductase && PF00106:short chain dehydrogenase	adh_short
TraesCS4D03G0783600	TraesCS4D02G337400	140.221	100.831	250.688	799.054	457.437	681.474	163.913	645.989	-1.97927	1.77009e-08	9.66287e-06	4D	Q9FVS9.1 RecName: Full=Alkane hydroxylase MAH1; AltName: Full=Cytochrome P450 96A15; AltName: Full=Protein MID-CHAIN ALKANE HYDROXYLASE 1 && PF00067:Cytochrome P450	p450
TraesCS4D03G0783700	TraesCS4D02G337500	64.1255	111.922	355.393	1724.55	541.077	1932.71	177.147	1399.44	-2.98233	0.000511448	0.0424055	4D	Q9FMY1.1 RecName: Full=Cytochrome P450 86B1 && PF00067:Cytochrome P450	p450
TraesCS4D03G0784600	TraesCS4D02G337900	23.0852	33.2742	36.244	0	2.06518	0	30.8678	0.688393	5.48964	2.15489e-06	0.000563385	4D	Q9FKA9.1 RecName: Full=Protein LATE FLOWERING && -	-
TraesCS4D03G0841400	TraesCS4D02G358800	37.6203	60.4986	215.451	7.25471	8.26072	35.5464	104.523	17.0206	2.61566	0.000233784	0.0229866	4D	Q7XJE6.1 RecName: Full=Metacaspase-1; Short=AtMC1; AltName: Full=Metacaspase 1b; Short=AtMCP1b; AltName: Full=Protein LSD ONE LIKE 3 && PF00656:Caspase domain	Peptidase_C14
TraesCS5A03G0020900	TraesCS5A02G008900	486.499	458.781	277.871	789.727	962.374	1060.3	407.717	937.466	-1.20054	4.29245e-06	0.0010031	5A	Q43255.1 RecName: Full=indolin-2-one monooxygenase; AltName: Full=Cytochrome P450 71C2; AltName: Full=Protein benzoxazineless 3 && PF00067:Cytochrome P450	p450
TraesCS5A03G0031900	TraesCS1A02G103900	212.897	173.429	348.346	126.439	110.487	95.4674	244.89	110.798	1.14382	0.000286884	0.0272269	1A	Q9LJM4.1 RecName: Full=Receptor-like protein kinase HAIKU2; Flags: Precursor && PF13855:Leucine rich repeat|PF08263:Leucine rich repeat N-terminal domain|PF00069:Protein kinase domain	Pkinase
TraesCS5A03G0099500	TraesCS5A02G039000	118.846	158.305	281.898	663.288	308.744	598.194	186.35	523.409	-1.49131	7.44442e-05	0.0095968	5A	Q84WN3.2 RecName: Full=Bidirectional sugar transporter SWEET17; Short=AtSWEET17; AltName: Full=Protein SUGARS WILL EVENTUALLY BE EXPORTED TRANSPORTERS 17 && PF03083:Sugar efflux transporter for intercellular exchange	-
TraesCS5A03G0191400	TraesCS5A02G075300	39.3303	49.4072	64.4339	129.548	104.292	256.949	51.0571	163.596	-1.683	2.30433e-05	0.00381229	5A	PF07059:Protein of unknown function (DUF1336)	-
TraesCS5A03G0211900	TraesCS5A02G084100	42.7503	21.1745	40.2712	152.349	47.4991	127.967	34.732	109.272	-1.65071	0.000479349	0.0404036	5A	Q9FIA1.1 RecName: Full=GDSL esterase/lipase At5g55050; AltName: Full=Extracellular lipase At5g55050; Flags: Precursor && PF00657:GDSL-like Lipase/Acylhydrolase	Lipase_GDSL
TraesCS5A03G0368600	TraesCS5A02G131400	222.302	209.728	316.129	719.253	381.026	673.35	249.386	591.209	-1.24579	2.97551e-05	0.00464622	5A	Q42569.1 RecName: Full=Cytochrome P450 90A1 && PF00067:Cytochrome P450	p450
TraesCS5A03G0396000	TraesCS5A02G142000	3.42003	9.07479	6.04067	63.2196	13.4237	49.7649	6.1785	42.1361	-2.78324	5.53264e-05	0.00755062	5A	Q8W488.1 RecName: Full=Protein DETOXIFICATION 21; Short=AtDTX21; AltName: Full=Multidrug and toxic compound extrusion protein 21; Short=MATE protein 21 && PF01554:MatE	MatE
TraesCS5A03G0469000	TraesCS5A02G175900	3937.3	3557.32	5146.65	8676.63	8849.3	9275.57	4213.76	8933.83	-1.08421	3.39091e-08	1.72676e-05	5A	F4JDF3.1 RecName: Full=Dirigent protein 8; Short=AtDIR8; Flags: Precursor && PF03018:Dirigent-like protein	-
TraesCS5A03G0478900	TraesCS5A02G180600	112.006	86.7146	133.902	229.042	207.551	268.121	110.874	234.904	-1.0831	3.01053e-05	0.00469017	5A	-	-
TraesCS5A03G0547300	TraesCS5A02G213900	813.111	721.95	1188	1971.21	1522.04	2465.9	907.687	1986.38	-1.13006	2.35786e-05	0.00383993	5A	Q6ERW9.2 RecName: Full=Probable cinnamyl alcohol dehydrogenase 8B; Short=OsCAD8B && PF08240:Alcohol dehydrogenase GroES-like domain|PF00107:Zinc-binding dehydrogenase	ADH_N
TraesCS5A03G0549300	TraesCS5A02G212800	115.426	29.241	49.3322	237.333	365.537	313.824	64.6663	305.564	-2.23406	2.37095e-07	8.93847e-05	5A	A2Z1N3.1 RecName: Full=Protein TIFY 10c && PF06200:tify domain|PF09425:Divergent CCT motif	Zim
TraesCS5A03G0564300	TraesCS5A02G219000	0	0	1.00678	41.4555	3.09777	32.4995	0.335593	25.6843	-6.23187	2.41002e-05	0.00390624	5A	P14897.1 RecName: Full=Low molecular mass early light-inducible protein HV90, chloroplastic; Short=ELIP; Flags: Precursor && PF00504:Chlorophyll A-B binding protein	-
TraesCS5A03G0564600	TraesCS5A02G219300	1.71001	0	3.02034	95.3476	13.4237	68.0459	1.57678	58.9391	-5.21934	2.39922e-08	1.26911e-05	5A	P14897.1 RecName: Full=Low molecular mass early light-inducible protein HV90, chloroplastic; Short=ELIP; Flags: Precursor && PF00504:Chlorophyll A-B binding protein	-
TraesCS5A03G0564800	TraesCS5A02G219500	0	0	0	19.6914	1.03259	50.7805	0	23.8348	-7.08623	1.01691e-05	0.00197134	5A	P14897.1 RecName: Full=Low molecular mass early light-inducible protein HV90, chloroplastic; Short=ELIP; Flags: Precursor && -	-
TraesCS5A03G0564900	TraesCS5A02G219600	0	0	0	43.5283	2.06518	11.1717	0	18.9217	-6.7524	2.3724e-05	0.00385441	5A	P14897.1 RecName: Full=Low molecular mass early light-inducible protein HV90, chloroplastic; Short=ELIP; Flags: Precursor && -	-
TraesCS5A03G0565100	TraesCS5A02G219700	0	0	0	24.8733	3.09777	16.2498	0	14.7403	-6.39243	3.07734e-05	0.00471884	5A	P14897.1 RecName: Full=Low molecular mass early light-inducible protein HV90, chloroplastic; Short=ELIP; Flags: Precursor && PF00504:Chlorophyll A-B binding protein	-
TraesCS5A03G0565500	TraesCS5A02G220100	29.9252	45.3739	52.3525	202.095	69.1835	134.061	42.5506	135.113	-1.67059	9.03132e-05	0.0111088	5A	-	-
TraesCS5A03G0601900	TraesCS5A02G238300	34.2003	24.1994	68.461	7.25471	4.13036	12.1873	42.2869	7.85746	2.42482	8.86718e-05	0.0109813	5A	Q8LB81.1 RecName: Full=GDSL esterase/lipase At5g33370; AltName: Full=Extracellular lipase At5g33370; Flags: Precursor && PF00657:GDSL-like Lipase/Acylhydrolase	Lipase_GDSL
TraesCS5A03G0689900	TraesCS5A02G280800	45.3153	44.3656	43.2915	89.1293	89.8353	124.92	44.3242	101.295	-1.19223	0.000105629	0.0125353	5A	Q9SV68.1 RecName: Full=Putative quinone-oxidoreductase homolog, chloroplastic && PF13602:Zinc-binding dehydrogenase|PF08240:Alcohol dehydrogenase GroES-like domain	ADH_N
TraesCS5A03G0768200	TraesCS5A02G316600	78.6606	26.216	18.122	0	8.26072	6.09366	40.9996	4.78479	3.10174	0.000184948	0.0192383	5A	Q9SLP1.1 RecName: Full=Cytochrome P450 78A9 && PF00067:Cytochrome P450	p450
TraesCS5A03G0856200	TraesCS5A02G356300	26.5052	71.59	125.847	6.21832	16.5214	1.01561	74.6475	7.91846	3.23679	1.09205e-05	0.00207571	5A	P53797.1 RecName: Full=Phytoene synthase, chloroplastic; Flags: Precursor && PF13966:zinc-binding in reverse transcriptase|PF13456:Reverse transcriptase-like|PF00494:Squalene/phytoene synthase	-
TraesCS5A03G0906200	TraesCS5A02G378700	6197.09	6367.47	6829.99	14734.3	10069.8	17941.8	6464.85	14248.6	-1.14015	1.44776e-06	0.00041163	5A	Q7G794.1 RecName: Full=Putative linoleate 9S-lipoxygenase 3; AltName: Full=Lipoxygenase 3 && PF00305:Lipoxygenase|PF01477:PLAT/LH2 domain	Lipoxygenase
TraesCS5A03G0907400	TraesCS5A02G379000	2.56502	2.01662	0	13.473	3.09777	76.1708	1.52721	30.9139	-4.31466	0.000232421	0.0229186	5A	Q7G794.1 RecName: Full=Putative linoleate 9S-lipoxygenase 3; AltName: Full=Lipoxygenase 3 && PF01477:PLAT/LH2 domain|PF00305:Lipoxygenase	Lipoxygenase
TraesCS5A03G0922800	TraesCS5A02G384700	76.9506	78.6481	121.82	43.5283	25.8147	38.5932	92.473	35.9787	1.36031	0.000195567	0.0201281	5A	-	-
TraesCS5A03G0939000	TraesCS5A02G393900	53.8654	44.3656	63.4271	23.8369	9.29331	13.2029	53.886	15.4444	1.80363	0.000100064	0.0120424	5A	Q9SGA8.1 RecName: Full=UDP-glycosyltransferase 83A1 && PF00201:UDP-glucoronosyl and UDP-glucosyl transferase	UDPGT
TraesCS5A03G1024000	TraesCS5A02G434100	302.672	377.108	365.461	868.492	502.871	1256.31	348.414	875.891	-1.33038	3.02478e-05	0.00469095	5A	Q852M0.1 RecName: Full=Glutamate dehydrogenase 1, mitochondrial; Short=OsGDH1; Flags: Precursor >A2XMV1.2 RecName: Full=Glutamate dehydrogenase 1, mitochondrial; Short=OsGDH1; Flags: Precursor && PF02812:Glu/Leu/Phe/Val dehydrogenase, dimerisation domain|PF00208:Glutamate/Leucine/Phenylalanine/Valine dehydrogenase	-
TraesCS5A03G1035600	TraesCS5A02G438900	0	2.01662	2.01356	22.8005	5.16295	49.7649	1.34339	25.9095	-4.31888	8.20482e-05	0.0103107	5A	Q2R0D2.1 RecName: Full=CASP-like protein 1U3; Short=OsCASPL1U3 && PF04535:Domain of unknown function (DUF588)	-
TraesCS5A03G1070000	TraesCS5A02G452700	270.182	347.867	558.762	1251.96	731.074	1198.42	392.27	1060.48	-1.4356	6.44062e-06	0.00138204	5A	O64864.1 RecName: Full=Protein YLS3; AltName: Full=Protein YELLOW-LEAF-SPECIFIC GENE 3; AltName: Full=Xylogen-like protein 9; Short=AtXYLP9; Flags: Precursor && PF14368:Probable lipid transfer	-
TraesCS5A03G1073100	TraesCS5A02G454200	5.98504	2.01662	3.02034	293.298	7.22813	866.316	3.674	388.947	-6.71891	7.74778e-06	0.00158764	5A	P04784.1 RecName: Full=Chlorophyll a-b binding protein, chloroplastic; AltName: Full=LHCII type I CAB; Short=LHCP; Flags: Precursor && PF00504:Chlorophyll A-B binding protein	-
TraesCS5A03G1114100	TraesCS5A02G472600	73.5305	46.3822	97.6576	164.786	195.159	153.357	72.5234	171.101	-1.23803	0.000101871	0.0122383	5A	Q9SF09.1 RecName: Full=Amino acid transporter ANT1; AltName: Full=Aromatic and neutral amino acid transporter 1 && PF01490:Transmembrane amino acid transporter protein	Aa_trans
TraesCS5A03G1126300	TraesCS5A02G478500	455.718	457.773	577.891	1306.88	663.955	1566.07	497.127	1178.97	-1.24604	6.1633e-05	0.00821416	5A	Q84TB6.1 RecName: Full=Actin-depolymerizing factor 3; Short=ADF-3; Short=OsADF3 && PF00241:Cofilin/tropomyosin-type actin-binding protein	Cofilin_ADF
TraesCS5A03G1133500	TraesCS5A02G482100	32.4902	38.3158	38.2576	75.6563	104.292	96.483	36.3545	92.1436	-1.34458	2.42733e-05	0.00392497	5A	Q9LFT0.1 RecName: Full=Protein trichome birefringence-like 19 && PF14416:PMR5 N terminal Domain|PF13839:GDSL/SGNH-like Acyl-Esterase family found in Pmr5 and Cas1p	-
TraesCS5A03G1154300	TraesCS5A02G492100	112.861	146.205	173.166	402.118	284.995	680.459	144.077	455.857	-1.66314	1.05593e-06	0.000316025	5A	O03982.1 RecName: Full=Heavy metal-associated isoprenylated plant protein 39; Short=AtHIP39; Flags: Precursor && -	-
TraesCS5A03G1198400	TraesCS5A02G510900	111.151	82.6814	192.295	496.429	295.321	375.776	128.709	389.175	-1.59715	3.32507e-06	0.000796115	5A	Q9FVS9.1 RecName: Full=Alkane hydroxylase MAH1; AltName: Full=Cytochrome P450 96A15; AltName: Full=Protein MID-CHAIN ALKANE HYDROXYLASE 1 && PF00067:Cytochrome P450	p450
TraesCS5A03G1198800	TraesCS5A02G511100	117.136	88.7312	260.756	1012.55	298.418	1090.77	155.541	800.578	-2.36444	9.28636e-07	0.000282437	5A	Q9FMY1.1 RecName: Full=Cytochrome P450 86B1 && PF00067:Cytochrome P450	p450
TraesCS5A03G1213000	TraesCS5A02G518300	2.56502	5.04155	7.04745	21.7641	32.0103	74.1395	4.88467	42.638	-3.14394	4.24764e-06	0.000999471	5A	Q75GA5.1 RecName: Full=Probable aquaporin TIP4-1; AltName: Full=Tonoplast intrinsic protein 4-1; Short=OsTIP4;1 && PF00230:Major intrinsic protein	-
TraesCS5A03G1223500	TraesCS5A02G524100	2.56502	4.03324	2.01356	14.5094	33.0429	15.2342	2.87061	20.9288	-2.87072	0.000270694	0.0260415	5A	Q8L7H3.1 RecName: Full=Probable xyloglucan endotransglucosylase/hydrolase protein 29; Short=At-XTH29; Short=XTH-29; Flags: Precursor && PF00722:Glycosyl hydrolases family 16	-
TraesCS5A03G1228700	TraesCS5A02G526200	607.91	496.088	863.816	1845.81	1090.41	2387.7	655.938	1774.64	-1.43602	6.72458e-06	0.00142641	5A	A2X5P7.2 RecName: Full=Beta-fructofuranosidase, insoluble isoenzyme 1; AltName: Full=Cell wall beta-fructosidase 1; AltName: Full=Invertase 1; AltName: Full=OsCIN1; AltName: Full=Sucrose hydrolase 1; Flags: Precursor && PF00251:Glycosyl hydrolases family 32 N-terminal domain|PF08244:Glycosyl hydrolases family 32 C terminal	-
TraesCS5A03G1242600	TraesCS5A02G532100	64.1255	49.4072	70.4745	150.276	151.791	158.435	61.3357	153.501	-1.32246	6.64439e-07	0.000213865	5A	P10742.2 RecName: Full=Stem 31 kDa glycoprotein; AltName: Full=Vegetative storage protein VSP25; Flags: Precursor && PF03767:HAD superfamily, subfamily IIIB (Acid phosphatase)	-
TraesCS5A03G1255100	TraesCS5A02G537000	188.101	244.011	203.369	77.729	108.422	78.202	211.827	88.1177	1.26468	1.53344e-06	0.000428843	5A	Q940Y1.1 RecName: Full=Oxysterol-binding protein-related protein 2A; AltName: Full=OSBP-related protein 2A && PF01237:Oxysterol-binding protein|PF15413:Pleckstrin homology domain	-
TraesCS5B03G0066900	TraesCS5B02G028300	64.1255	109.906	133.902	726.507	226.137	1117.17	102.644	689.939	-2.75046	7.85275e-09	4.74202e-06	5B	Q9LHT0.1 RecName: Full=Tropinone reductase homolog At5g06060 && PF00106:short chain dehydrogenase	adh_short
TraesCS5B03G0106000	TraesCS5B02G040700	71.8205	46.3822	116.786	255.988	193.094	294.527	78.3297	247.87	-1.66281	2.42147e-06	0.000614252	5B	Q84WN3.2 RecName: Full=Bidirectional sugar transporter SWEET17; Short=AtSWEET17; AltName: Full=Protein SUGARS WILL EVENTUALLY BE EXPORTED TRANSPORTERS 17 && PF03083:Sugar efflux transporter for intercellular exchange	-
TraesCS5B03G0148400	TraesCS5B02G059200	11.1151	12.0997	25.1695	176.186	25.8147	290.465	16.1281	164.155	-3.35161	5.0111e-07	0.000165991	5B	Q99090.2 RecName: Full=Light-inducible protein CPRF2; AltName: Full=Common plant regulatory factor 2; Short=CPRF-2 && PF12498:Basic leucine-zipper C terminal|PF00170:bZIP transcription factor	bZIP_1
TraesCS5B03G0159600	TraesCS5B02G064000	26.5052	45.3739	96.6508	545.14	258.147	519.992	56.1766	441.093	-2.97772	1.65292e-11	1.97878e-08	5B	Q12628.1 RecName: Full=Glucan 1,3-beta-glucosidase; AltName: Full=Exo-1,3-beta-glucanase; Flags: Precursor && PF00150:Cellulase (glycosyl hydrolase family 5)	-
TraesCS5B03G0224000	TraesCS5B02G089700	12.8251	15.1246	17.1152	66.3288	38.2058	46.7181	15.0217	50.4176	-1.75117	7.52956e-05	0.00965779	5B	Q9FIA1.1 RecName: Full=GDSL esterase/lipase At5g55050; AltName: Full=Extracellular lipase At5g55050; Flags: Precursor && -	-
TraesCS5B03G0276300	TraesCS5B02G108600	29.9252	58.482	29.1966	92.2385	103.259	109.686	39.2013	101.728	-1.38036	0.000130707	0.0147241	5B	Q9AXQ4.1 RecName: Full=Eukaryotic translation initiation factor 5A-3; Short=eIF-5A-3 && PF01287:Eukaryotic elongation factor 5A hypusine, DNA-binding OB fold	-
TraesCS5B03G0461500	TraesCS5B02G172200	963.592	734.049	1258.47	2280.05	1386.77	2412.07	985.372	2026.3	-1.04014	0.000253397	0.024715	5B	Q84TH6.1 RecName: Full=Dirigent protein 23; Short=AtDIR23; Flags: Precursor && PF03018:Dirigent-like protein	-
TraesCS5B03G0574800	TraesCS5B02G217900	0	0	0	22.8005	1.03259	11.1717	0	11.6683	-6.05513	0.000298746	0.0280793	5B	P14897.1 RecName: Full=Low molecular mass early light-inducible protein HV90, chloroplastic; Short=ELIP; Flags: Precursor && PF00504:Chlorophyll A-B binding protein	-
TraesCS5B03G0577500	TraesCS5B02G219300	88.0657	142.172	165.112	910.984	261.245	616.475	131.783	596.235	-2.17917	1.42617e-07	5.79271e-05	5B	-	-
TraesCS5B03G0616800	TraesCS5B02G235700	144.496	138.138	191.288	72.5471	81.5746	69.0615	157.974	74.3944	1.08575	5.69682e-05	0.0077437	5B	-	-
TraesCS5B03G0628100	TraesCS5B02G241000	6.84005	11.0914	21.1424	52.8557	20.6518	126.951	13.0246	66.8196	-2.36728	0.000348097	0.0315287	5B	I4DST9.1 RecName: Full=Tuliposide A-converting enzyme 2, chloroplastic; Short=TgTCEA2; Flags: Precursor && PF07859:alpha/beta hydrolase fold	Abhydrolase_3
TraesCS5B03G0680400	TraesCS5B02G261700	9.40507	36.2991	26.1763	157.531	89.8353	78.202	23.9602	108.523	-2.18937	6.73101e-06	0.00142641	5B	-	-
TraesCS5B03G0700100	TraesCS5B02G268100	277.877	385.174	467.145	102.602	89.8353	70.0771	376.732	87.5049	2.1055	1.16508e-13	2.65005e-10	5B	Q9S9N9.1 RecName: Full=Cinnamoyl-CoA reductase 1; Short=AtCCR1; AltName: Full=Protein IRREGULAR XYLEM 4 && PF01370:NAD dependent epimerase/dehydratase family	Epimerase
TraesCS5B03G0752000	TraesCS5B02G291000	17.9551	15.1246	24.1627	88.0929	35.1081	87.3425	19.0808	70.1811	-1.88037	6.36886e-05	0.00843868	5B	Q9LW26.1 RecName: Full=Acyltransferase-like protein At3g26840, chloroplastic; Flags: Precursor && PF12146:Serine aminopeptidase, S33|PF03982:Diacylglycerol acyltransferase	-
TraesCS5B03G0752100	TraesCS5B02G291100	8.55006	9.07479	9.06101	52.8557	19.6192	61.9522	8.89529	44.8091	-2.33418	4.40967e-05	0.00629396	5B	Q9ZVN2.1 RecName: Full=Acyltransferase-like protein At1g54570, chloroplastic; Flags: Precursor && PF03982:Diacylglycerol acyltransferase|PF12146:Serine aminopeptidase, S33	-
TraesCS5B03G0805000	TraesCS5B02G318100	25.6502	25.2077	66.4474	144.058	59.8902	235.622	39.1018	146.523	-1.90907	0.000291589	0.0276349	5B	O81970.1 RecName: Full=Cytochrome P450 71A9; AltName: Full=Cytochrome P450 CP1 && PF00067:Cytochrome P450	p450
TraesCS5B03G0805100	TraesCS5B02G318200	5.98504	1.00831	5.03389	34.2008	16.5214	35.5464	4.00908	28.7562	-2.82296	6.99619e-05	0.00918022	5B	O81970.1 RecName: Full=Cytochrome P450 71A9; AltName: Full=Cytochrome P450 CP1 && PF00067:Cytochrome P450	p450
TraesCS5B03G0958400	TraesCS5B02G382600	2956.61	3721.67	5466.81	10139	5878.53	11805.5	4048.36	9274.32	-1.19598	0.000122611	0.0141026	5B	P29250.2 RecName: Full=Linoleate 9S-lipoxygenase 2; AltName: Full=Lipoxygenase 2; AltName: Full=Lipoxygenase L-2 && PF00305:Lipoxygenase|PF01477:PLAT/LH2 domain	Lipoxygenase
TraesCS5B03G0960600	TraesCS5B02G383700	613.895	981.085	1670.25	3524.75	1804.97	2812.22	1088.41	2713.98	-1.31849	0.000293938	0.0277804	5B	Q9AXQ9.1 RecName: Full=Deoxyhypusine synthase && PF01916:Deoxyhypusine synthase	-
TraesCS5B03G1003500	TraesCS5B02G406000	7.69506	7.05817	13.0881	51.8194	23.7496	70.0771	9.28045	48.5487	-2.39255	2.32477e-05	0.00381334	5B	Q42430.1 RecName: Full=Zinc finger protein 1; AltName: Full=WZF1 && PF13912:C2H2-type zinc finger	-
TraesCS5B03G1060800	TraesCS5B02G431200	64.1255	35.2908	51.3457	143.021	105.324	156.404	50.254	134.917	-1.42	1.5707e-05	0.00282797	5B	Q9FZ96.1 RecName: Full=Purine permease 1; Short=AtPUP1 && PF16913:Purine nucleobase transmembrane transport	-
TraesCS5B03G1107400	TraesCS5B02G451400	124.831	159.313	118.8	70.4743	55.7599	49.7649	134.315	58.6664	1.19471	4.12271e-05	0.00599832	5B	Q851R2.1 RecName: Full=Protein argonaute MEL1; AltName: Full=Protein MEIOSIS ARRESTED AT LEPTOTENE 1; Short=OsMEL1 && PF02170:PAZ domain|PF16488:Argonaute linker 2 domain|PF02171:Piwi domain|PF16487:Mid domain of argonaute|PF16486:N-terminal domain of argonaute|PF08699:Argonaute linker 1 domain	Piwi
TraesCS5B03G1193100	TraesCS5B02G491500	31.6352	63.5235	67.4542	207.277	59.8902	321.948	54.2043	196.372	-1.86004	0.000374013	0.0331448	5B	Q84TB6.1 RecName: Full=Actin-depolymerizing factor 3; Short=ADF-3; Short=OsADF3 && PF00241:Cofilin/tropomyosin-type actin-binding protein	Cofilin_ADF
TraesCS5B03G1309400	TraesCS5B02G549400	17.1001	39.3241	57.3864	148.203	71.2487	281.324	37.9369	166.925	-2.1428	4.89541e-05	0.00684525	5B	P0C042.1 RecName: Full=Uncharacterized protein At4g15970 && PF03407:Nucleotide-diphospho-sugar transferase	-
TraesCS5B03G1314300	TraesCS5B02G551900	139.366	146.205	243.641	816.673	354.178	1001.39	176.404	724.081	-2.03812	8.33737e-08	3.74288e-05	5B	Q92503.2 RecName: Full=SEC14-like protein 1 && PF00650:CRAL/TRIO domain	-
TraesCS5B03G1314700	TraesCS5B02G552100	6.84005	5.04155	24.1627	551.358	252.985	491.555	12.0148	431.966	-5.18075	2.23655e-26	3.05231e-22	5B	Q03606.3 RecName: Full=CRAL-TRIO domain-containing protein T23G5.2 && PF00650:CRAL/TRIO domain	-
TraesCS5B03G1356500	TraesCS5B02G560300	214.607	164.354	162.091	92.2385	77.4442	99.5298	180.351	89.7375	1.00853	0.00010883	0.0128482	5B	O04707.1 RecName: Full=Gibberellin 20 oxidase 1-A; AltName: Full=GA 20-oxidase 1-A; AltName: Full=Gibberellin C-20 oxidase 1-B; AltName: Full=TaGA20ox1-A; Short=Ta20ox1A && PF03171:2OG-Fe(II) oxygenase superfamily|PF14226:non-haem dioxygenase in morphine synthesis N-terminal	2OG-FeII_Oxy
TraesCS5B03G1381800	TraesCS5B02G572600	0.855006	1.00831	5.03389	46.6374	10.3259	37.5776	2.29907	31.5136	-3.8045	1.70683e-05	0.00301294	5B	Q8GU84.1 RecName: Full=ABC transporter G family member 48; Short=OsABCG48; AltName: Full=Pleiotropic drug resistance protein 3; Short=OsPDR3 && PF08370:Plant PDR ABC transporter associated|PF00005:ABC transporter|PF14510:ABC-transporter extracellular N-terminal|PF01061:ABC-2 type transporter	ABC2_membrane
TraesCS5D03G0030900	TraesCS5D02G014300	468.543	390.216	238.607	608.359	1283.51	757.645	365.789	883.171	-1.271	0.000170066	0.0180634	5D	Q43255.1 RecName: Full=indolin-2-one monooxygenase; AltName: Full=Cytochrome P450 71C2; AltName: Full=Protein benzoxazineless 3 && PF00067:Cytochrome P450	p450
TraesCS5D03G0031100	TraesCS5D02G014400	86.3556	142.172	85.5762	349.262	365.537	490.54	104.701	401.78	-1.94225	9.98518e-12	1.26178e-08	5D	PF12796:Ankyrin repeats (3 copies)|PF13414:TPR repeat	-
TraesCS5D03G0074100	TraesCS5D02G030000	216.317	252.077	303.04	775.218	644.336	1221.78	257.145	880.444	-1.77648	3.93167e-10	3.1563e-07	5D	P46420.2 RecName: Full=Glutathione S-transferase 4; AltName: Full=GST class-phi member 4; AltName: Full=GST-27; AltName: Full=GST-IV && PF00043:Glutathione S-transferase, C-terminal domain|PF02798:Glutathione S-transferase, N-terminal domain	GST_N
TraesCS5D03G0079400	TraesCS5D02G031800	333.452	330.726	514.464	915.13	604.065	879.518	392.881	799.571	-1.02569	0.000123331	0.0141204	5D	Q9ASS7.1 RecName: Full=Cationic amino acid transporter 2, vacuolar && PF13906:C-terminus of AA_permease|PF13520:Amino acid permease	-
TraesCS5D03G0082200	TraesCS5D02G033000	25.6502	44.3656	47.3186	2.07277	7.22813	0	39.1115	3.1003	3.65894	1.35723e-06	0.000392429	5D	Q9SD22.1 RecName: Full=Senescence/dehydration-associated protein At3g51250 && -	-
TraesCS5D03G0096000	TraesCS5D02G037500	14.5351	16.133	25.1695	101.566	34.0755	139.139	18.6125	91.5933	-2.30315	1.24594e-05	0.0023352	5D	Q9LHT0.1 RecName: Full=Tropinone reductase homolog At5g06060 && PF00106:short chain dehydrogenase	adh_short
TraesCS5D03G0116600	TraesCS5D02G046300	222.302	184.521	273.844	634.269	385.156	536.242	226.889	518.556	-1.19262	6.92843e-06	0.0014637	5D	Q84WN3.2 RecName: Full=Bidirectional sugar transporter SWEET17; Short=AtSWEET17; AltName: Full=Protein SUGARS WILL EVENTUALLY BE EXPORTED TRANSPORTERS 17 && PF03083:Sugar efflux transporter for intercellular exchange	-
TraesCS5D03G0161300	TraesCS5D02G066200	21.3752	63.5235	21.1424	1.03639	4.13036	2.03122	35.347	2.39932	3.87817	2.85443e-06	0.000703169	5D	Q8VY49.1 RecName: Full=Protein LIKE COV 1 && -	-
TraesCS5D03G0366300	TraesCS5D02G146500	24.7952	4.03324	18.122	0	0	0	15.6501	0	6.37498	2.09858e-05	0.00354458	5D	B9G934.2 RecName: Full=Cytochrome P450 714C3 && PF00067:Cytochrome P450	p450
TraesCS5D03G0402800	TraesCS5D02G165000	206.057	206.703	285.925	597.995	403.743	421.478	232.895	474.405	-1.02713	5.77433e-05	0.00780244	5D	-	-
TraesCS5D03G0431100	TraesCS5D02G179200	534.379	470.881	823.545	1862.39	1617.04	2361.29	609.602	1946.91	-1.67554	3.3128e-10	2.86146e-07	5D	Q67YM6.1 RecName: Full=Dirigent protein 11; Short=AtDIR11; Flags: Precursor && PF03018:Dirigent-like protein	-
TraesCS5D03G0431200	TraesCS5D02G179300	305.237	326.692	555.742	1675.84	1190.58	2027.16	395.891	1631.19	-2.04342	7.33711e-12	1.00132e-08	5D	PF03018:Dirigent-like protein	-
TraesCS5D03G0441400	TraesCS5D02G185100	168.436	119.989	176.186	380.354	240.593	332.105	154.87	317.684	-1.03575	0.000135027	0.0151047	5D	-	-
TraesCS5D03G0513000	TraesCS5D02G219300	140.221	38.3158	78.5288	264.279	426.46	364.604	85.6885	351.781	-2.03314	6.6782e-07	0.000213944	5D	A2Z1N3.1 RecName: Full=Protein TIFY 10c && PF09425:Divergent CCT motif|PF06200:tify domain	Zim
TraesCS5D03G0530100	TraesCS5D02G227000	0	0	0	31.0916	1.03259	11.1717	0	14.432	-6.3617	0.000126743	0.0143903	5D	P14897.1 RecName: Full=Low molecular mass early light-inducible protein HV90, chloroplastic; Short=ELIP; Flags: Precursor && PF00504:Chlorophyll A-B binding protein	-
TraesCS5D03G0530500	TraesCS5D02G227400	1.71001	0	2.01356	68.4015	9.29331	58.9054	1.24119	45.5334	-5.17642	3.32916e-07	0.000117706	5D	P14897.1 RecName: Full=Low molecular mass early light-inducible protein HV90, chloroplastic; Short=ELIP; Flags: Precursor && -	-
TraesCS5D03G0530700	TraesCS5D02G227600	0	0	0	40.4191	2.06518	23.359	0	21.9478	-6.96672	6.40658e-06	0.00138204	5D	P14897.1 RecName: Full=Low molecular mass early light-inducible protein HV90, chloroplastic; Short=ELIP; Flags: Precursor && PF00504:Chlorophyll A-B binding protein	-
TraesCS5D03G0530900	TraesCS5D02G227700	0	0	0	123.33	4.13036	73.1239	0	66.8615	-8.57385	7.87184e-05	0.0100215	5D	P14897.1 RecName: Full=Low molecular mass early light-inducible protein HV90, chloroplastic; Short=ELIP; Flags: Precursor && PF00504:Chlorophyll A-B binding protein	-
TraesCS5D03G0532200	TraesCS5D02G228200	204.347	243.003	241.627	576.231	402.71	431.634	229.659	470.192	-1.03462	5.8066e-06	0.00127404	5D	-	-
TraesCS5D03G0543300	TraesCS5D02G233700	55.5754	88.7312	58.3932	131.621	135.269	239.684	67.5666	168.858	-1.32386	0.000140183	0.0155947	5D	Q39224.1 RecName: Full=Protein SRG1; Short=AtSRG1; AltName: Full=Protein SENESCENCE-RELATED GENE 1 && PF03171:2OG-Fe(II) oxygenase superfamily|PF14226:non-haem dioxygenase in morphine synthesis N-terminal	2OG-FeII_Oxy
TraesCS5D03G0574300	TraesCS5D02G249600	9.40507	12.0997	10.0678	77.729	17.554	84.2957	10.5242	59.8596	-2.5106	3.39795e-05	0.00509596	5D	I4DST8.1 RecName: Full=Tuliposide A-converting enzyme 1, chloroplastic; Short=TgTCEA1; Flags: Precursor && PF07859:alpha/beta hydrolase fold	Abhydrolase_3
TraesCS5D03G0632600	TraesCS5D02G276300	1749.34	1766.56	2040.74	704.743	1205.03	365.62	1852.21	758.465	1.28813	0.000356287	0.0319895	5D	Q9S9N9.1 RecName: Full=Cinnamoyl-CoA reductase 1; Short=AtCCR1; AltName: Full=Protein IRREGULAR XYLEM 4 && PF01370:NAD dependent epimerase/dehydratase family	Epimerase
TraesCS5D03G0728800	TraesCS5D02G322900	171.001	97.806	115.78	5.18194	42.3362	23.359	128.196	23.6257	2.44066	6.34579e-06	0.00137466	5D	Q9SLP1.1 RecName: Full=Cytochrome P450 78A9 && PF00067:Cytochrome P450	p450
TraesCS5D03G0730000	TraesCS5D02G323800	45.3153	60.4986	152.024	632.196	182.768	760.692	85.9458	525.219	-2.61346	4.94664e-07	0.000165687	5D	Q9STK8.1 RecName: Full=Cytochrome P450 71A25 && PF00067:Cytochrome P450	p450
TraesCS5D03G0852000	TraesCS5D02G379200	53.0104	61.5069	95.644	831.182	148.693	1013.58	70.0538	664.485	-3.24629	3.08598e-05	0.00472148	5D	P12952.1 RecName: Full=Dehydrin DHN2; AltName: Full=B9 && PF00257:Dehydrin	-
TraesCS5D03G0868800	TraesCS5D02G388800	641.255	604.986	702.732	3581.75	2290.28	3088.47	649.657	2986.84	-2.20091	7.48422e-24	5.67445e-20	5D	P29250.2 RecName: Full=Linoleate 9S-lipoxygenase 2; AltName: Full=Lipoxygenase 2; AltName: Full=Lipoxygenase L-2 && PF00305:Lipoxygenase|PF01477:PLAT/LH2 domain	Lipoxygenase
TraesCS5D03G0871300	TraesCS5D02G389700	381.333	424.498	622.189	1406.38	1052.21	911.002	476.007	1123.2	-1.23911	3.06523e-06	0.000749686	5D	Q9AXQ9.1 RecName: Full=Deoxyhypusine synthase && PF01916:Deoxyhypusine synthase	-
TraesCS5D03G0874100	TraesCS5D02G391000	0.855006	4.03324	4.02712	72.5471	15.4888	447.884	2.97179	178.64	-5.92118	2.13376e-05	0.0035951	5D	A6YIH8.1 RecName: Full=Premnaspirodiene oxygenase; Short=HPO; AltName: Full=Cytochrome P450 71D55 && PF00067:Cytochrome P450	p450
TraesCS5D03G0895000	TraesCS5D02G401700	0.855006	1.00831	1.00678	12.4366	9.29331	18.281	0.956698	13.337	-3.80811	0.000583137	0.0467585	5D	Q6Q9H6.2 RecName: Full=MADS-box transcription factor 34; AltName: Full=OsMADS34; AltName: Full=RMADS212/RMADS217/RMADS221 && PF00319:SRF-type transcription factor (DNA-binding and dimerisation domain)|PF01486:K-box region	K-box
TraesCS5D03G0912900	TraesCS5D02G412800	49.5904	75.6232	65.4406	11.4003	33.0429	17.2654	63.5514	20.5695	1.62565	0.000396914	0.0346345	5D	Q9FJV5.1 RecName: Full=Probable transcription factor KAN4; AltName: Full=Protein ABERRANT TESTA SHAPE; AltName: Full=Protein KANADI 4 && PF00249:Myb-like DNA-binding domain	Myb_DNA-binding
TraesCS5D03G0957500	TraesCS5D02G435900	92.3407	140.155	140.949	401.082	395.482	229.528	124.482	342.031	-1.46028	1.53124e-06	0.000428843	5D	O23887.1 RecName: Full=Indole-3-acetaldehyde oxidase; Short=IAA oxidase; AltName: Full=Aldehyde oxidase; Short=ZmAO-1 && PF00941:FAD binding domain in molybdopterin dehydrogenase|PF01799:[2Fe-2S] binding domain|PF02738:Molybdopterin-binding domain of aldehyde dehydrogenase|PF03450:CO dehydrogenase flavoprotein C-terminal domain|PF01315:Aldehyde oxidase and xanthine dehydrogenase, a/b hammerhead d…	-
TraesCS5D03G1000700	TraesCS5D02G455900	5.13004	4.03324	11.0746	49.7466	13.4237	38.5932	6.74595	33.9211	-2.33689	0.000559753	0.0454172	5D	Q9LH84.1 RecName: Full=AAA-ATPase At3g28510 && PF00004:ATPase family associated with various cellular activities (AAA)|PF14363:Domain associated at C-terminal with AAA	AAA
TraesCS5D03G1025400	TraesCS5D02G463100	365.088	379.124	739.983	1396.01	905.581	1571.15	494.732	1290.91	-1.38419	2.2709e-05	0.00378519	5D	O64864.1 RecName: Full=Protein YLS3; AltName: Full=Protein YELLOW-LEAF-SPECIFIC GENE 3; AltName: Full=Xylogen-like protein 9; Short=AtXYLP9; Flags: Precursor && PF14368:Probable lipid transfer	-
TraesCS5D03G1027800	TraesCS5D02G464700	0	1.00831	3.02034	186.55	1.03259	829.754	1.34288	339.112	-7.99522	0.00021403	0.0215727	5D	P04784.1 RecName: Full=Chlorophyll a-b binding protein, chloroplastic; AltName: Full=LHCII type I CAB; Short=LHCP; Flags: Precursor && PF00504:Chlorophyll A-B binding protein	-
TraesCS5D03G1027900	TraesCS5D02G464800	7.69506	14.1163	33.2237	425.955	18.5866	1204.51	18.345	549.685	-4.90684	0.000332218	0.0305108	5D	P04784.1 RecName: Full=Chlorophyll a-b binding protein, chloroplastic; AltName: Full=LHCII type I CAB; Short=LHCP; Flags: Precursor && PF00504:Chlorophyll A-B binding protein	-
TraesCS5D03G1035200	TraesCS5D02G469400	24.7952	40.3324	18.122	1.03639	0	0	27.7499	0.345462	6.2342	2.55916e-06	0.000646776	5D	Q6ZIX2.1 RecName: Full=Cycloartenol-C-24-methyltransferase 1; AltName: Full=24-sterol C-methyltransferase 1; Short=Sterol C-methyltransferase 1 && PF08498:Sterol methyltransferase C-terminal|PF08241:Methyltransferase domain	Methyltransf_11
TraesCS5D03G1066500	TraesCS5D02G485100	37.6203	50.4155	74.5016	131.621	92.9331	153.357	54.1791	125.97	-1.22182	0.000554652	0.0452079	5D	Q9SF09.1 RecName: Full=Amino acid transporter ANT1; AltName: Full=Aromatic and neutral amino acid transporter 1 && PF01490:Transmembrane amino acid transporter protein	Aa_trans
TraesCS5D03G1067100	TraesCS5D02G485500	17.1001	9.07479	31.2101	97.4204	22.717	235.622	19.1284	118.586	-2.63345	0.000126326	0.0143668	5D	O80327.1 RecName: Full=Thaumatin-like protein 1; Flags: Precursor && PF00314:Thaumatin family	Thaumatin
TraesCS5D03G1079100	TraesCS5D02G491900	206.057	301.485	469.159	1985.72	549.338	2975.74	325.567	1836.93	-2.4965	0.000536238	0.043894	5D	Q84TB6.1 RecName: Full=Actin-depolymerizing factor 3; Short=ADF-3; Short=OsADF3 && PF00241:Cofilin/tropomyosin-type actin-binding protein	Cofilin_ADF
TraesCS5D03G1107700	TraesCS5D02G507300	34.2003	50.4155	40.2712	214.532	168.312	202.106	41.629	194.984	-2.23255	3.4051e-15	1.11423e-11	5D	O31581.1 RecName: Full=AB hydrolase superfamily protein YfhM && PF00561:alpha/beta hydrolase fold	Abhydrolase_1
TraesCS5D03G1120100	TraesCS5D02G513100	0	1.00831	3.02034	197.95	19.6192	150.31	1.34288	122.626	-6.54645	1.66612e-06	0.000452953	5D	Q7G794.1 RecName: Full=Putative linoleate 9S-lipoxygenase 3; AltName: Full=Lipoxygenase 3 && PF00305:Lipoxygenase|PF01477:PLAT/LH2 domain	Lipoxygenase
TraesCS5D03G1169800	TraesCS5D02G536500	35.9103	21.1745	46.3118	100.53	67.1183	143.201	34.4655	103.616	-1.58755	0.000123258	0.0141204	5D	P0C042.1 RecName: Full=Uncharacterized protein At4g15970 && PF03407:Nucleotide-diphospho-sugar transferase	-
TraesCS5D03G1173700	TraesCS5D02G538300	144.496	143.18	279.885	606.286	261.245	792.176	189.187	553.236	-1.54888	0.000145626	0.0159661	5D	Q92503.2 RecName: Full=SEC14-like protein 1 && PF00650:CRAL/TRIO domain	-
TraesCS5D03G1174000	TraesCS5D02G538500	6.84005	4.03324	26.1763	680.906	210.648	551.476	12.3498	481.01	-5.28798	1.40072e-09	9.95632e-07	5D	P53860.1 RecName: Full=Phosphatidylinositol transfer protein PDR16; Short=PITP; AltName: Full=Pleiotropic drug resistance protein 16; AltName: Full=SEC14 homolog 3 && PF00650:CRAL/TRIO domain	-
TraesCS5D03G1174600	TraesCS5D02G538700	17.1001	19.1579	29.1966	79.8018	70.2161	184.841	21.8182	111.62	-2.35958	4.05138e-07	0.000140332	5D	P33324.2 RecName: Full=CRAL-TRIO domain-containing protein YKL091C && PF00650:CRAL/TRIO domain	-
TraesCS6A03G0003500	TraesCS6A02G001500	49.5904	70.5817	135.915	275.679	145.595	404.213	85.3624	275.162	-1.69123	0.000119376	0.0137832	6A	P41213.1 RecName: Full=Leucoanthocyanidin dioxygenase; Short=LDOX; Short=Leucocyanidin oxygenase; AltName: Full=Leucoanthocyanidin hydroxylase && PF14226:non-haem dioxygenase in morphine synthesis N-terminal|PF03171:2OG-Fe(II) oxygenase superfamily	2OG-FeII_Oxy
TraesCS6A03G0088700	TraesCS6A02G039200	3.42003	3.02493	3.02034	115.039	14.4563	159.451	3.1551	96.3153	-4.92889	7.60256e-10	5.70083e-07	6A	Q9LTJ6.1 RecName: Full=WD repeat-containing protein RUP1; AltName: Full=Protein EARLY FLOWERING BY OVEREXPRESSION 1; AltName: Full=Protein REPRESSOR OF UV-B PHOTOMORPHOGENESIS 1 && -	-
TraesCS6A03G0215300	TraesCS6A02G093700	0.855006	1.00831	3.02034	189.659	2.06518	885.612	1.62788	359.112	-7.79338	1.71759e-05	0.00301294	6A	P04784.1 RecName: Full=Chlorophyll a-b binding protein, chloroplastic; AltName: Full=LHCII type I CAB; Short=LHCP; Flags: Precursor && PF00504:Chlorophyll A-B binding protein	-
TraesCS6A03G0262500	TraesCS6A02G111400	56.4304	59.4903	86.583	292.261	125.976	258.981	67.5012	225.739	-1.74348	1.62162e-06	0.000445034	6A	Q2R712.1 RecName: Full=Achilleol B synthase && PF13243:Squalene-hopene cyclase C-terminal domain|PF13249:Squalene-hopene cyclase N-terminal domain	-
TraesCS6A03G0266900	TraesCS6A02G113000	176.986	233.928	437.949	115.039	88.8027	145.232	282.954	116.358	1.2808	0.000478027	0.0403702	6A	Q6Z2W3.2 RecName: Full=Auxin response factor 5 && PF06507:Auxin response factor|PF02309:AUX/IAA family|PF02362:B3 DNA binding domain	Auxin_resp
TraesCS6A03G0348200	TraesCS6A02G146000	1.71001	0	2.01356	9.32748	21.6844	25.3903	1.24119	18.8007	-3.90033	0.000115068	0.0133947	6A	O22527.1 RecName: Full=Chlorophyllase-1; Short=AtCLH1; AltName: Full=Chlorophyll-chlorophyllido hydrolase 1; Short=Chlase 1; AltName: Full=Coronatine-induced protein 1; Short=CORI1 && PF07224:Chlorophyllase	-
TraesCS6A03G0354300	TraesCS6A02G148600	64.1255	65.5401	94.6372	158.567	145.595	146.248	74.7676	150.137	-1.00821	0.000224173	0.0223312	6A	P0DKJ4.1 RecName: Full=Bidirectional sugar transporter SWEET2a; Short=SbSWEET2a && PF03083:Sugar efflux transporter for intercellular exchange	-
TraesCS6A03G0356900	TraesCS6A02G149700	96.6157	68.565	155.044	322.316	191.029	243.746	106.742	252.364	-1.24206	0.000327628	0.0302295	6A	F4INN2.1 RecName: Full=Gamma-glutamyl peptidase 4 && PF00117:Glutamine amidotransferase class-I	GATase
TraesCS6A03G0375900	TraesCS6A02G154700	26.5052	20.1662	36.244	104.675	53.6947	66.0147	27.6385	74.7948	-1.43683	0.000491943	0.0412899	6A	Q8LGS1.2 RecName: Full=Protein MARD1; AltName: Full=Mediator of ABA-regulated dormancy1; AltName: Full=Senescence-associated protein SAG102 && PF04570:zinc-finger of the FCS-type, C2-C2	-
TraesCS6A03G0395000	TraesCS6A02G162900	0.855006	5.04155	0	61.1468	4.13036	61.9522	1.96552	42.4098	-4.45312	2.68586e-05	0.00424248	6A	B3H7A9.1 RecName: Full=Probable peroxygenase 7; Short=AtPXG7; AltName: Full=Caleosin-7 && PF05042:Caleosin related protein	-
TraesCS6A03G0587200	TraesCS6A02G213900	180.406	192.587	201.356	574.158	298.418	510.852	191.45	461.143	-1.26865	5.52915e-06	0.00122897	6A	PF13857:Ankyrin repeats (many copies)|PF12796:Ankyrin repeats (3 copies)	-
TraesCS6A03G0594100	TraesCS6A02G216400	1.71001	1.00831	9.06101	194.841	54.7273	158.435	3.92644	136.001	-5.1384	4.13503e-14	1.08524e-10	6A	Q9SID1.2 RecName: Full=B-box zinc finger protein 25; AltName: Full=Protein SALT TOLERANCE HOMOLOG 1; AltName: Full=Salt tolerance-like protein && PF00643:B-box zinc finger	zf-B_box
TraesCS6A03G0641100	TraesCS6A02G233100	131.671	105.873	139.942	485.029	164.182	282.34	125.829	310.517	-1.30288	0.000479607	0.0404036	6A	Q9M0Y6.1 RecName: Full=Putative PAP-specific phosphatase, mitochondrial; AltName: Full=3'(2'),5'-bisphosphate nucleotidase; AltName: Full=3'(2'),5-bisphosphonucleoside 3'(2')-phosphohydrolase; AltName: Full=DPNPase; Flags: Precursor && PF00459:Inositol monophosphatase family	-
TraesCS6A03G0675300	TraesCS6A02G249200	343.713	313.584	366.468	1042.61	849.821	719.052	341.255	870.493	-1.35087	2.5315e-10	2.33436e-07	6A	Q6H676.1 RecName: Full=Expansin-B11; AltName: Full=Beta-expansin-11; AltName: Full=OsEXPB11; AltName: Full=OsaEXPb1.20; Flags: Precursor && PF01357:Pollen allergen|PF03330:Rare lipoprotein A (RlpA)-like double-psi beta-barrel	-
TraesCS6A03G0675400	TraesCS6A02G249300	339.438	292.41	456.071	1207.39	958.243	913.034	362.639	1026.22	-1.50101	2.73964e-10	2.4598e-07	6A	Q6H676.1 RecName: Full=Expansin-B11; AltName: Full=Beta-expansin-11; AltName: Full=OsEXPB11; AltName: Full=OsaEXPb1.20; Flags: Precursor && PF01357:Pollen allergen|PF03330:Rare lipoprotein A (RlpA)-like double-psi beta-barrel	-
TraesCS6A03G0689500	TraesCS6A02G255600	56.4304	57.4736	111.752	20.7277	20.6518	15.2342	75.2188	18.8712	1.99342	5.21761e-06	0.00118284	6A	-	-
TraesCS6A03G0702700	TraesCS6A02G262000	54.7204	26.216	45.3051	147.167	143.53	131.014	42.0805	140.57	-1.73372	1.11934e-07	4.70656e-05	6A	PF04570:zinc-finger of the FCS-type, C2-C2	-
TraesCS6A03G0713400	TraesCS6A02G266700	118.846	102.848	122.827	332.68	128.041	440.775	114.84	300.499	-1.38764	0.000484301	0.0407022	6A	Q42982.2 RecName: Full=Probable 4-coumarate--CoA ligase 2; Short=4CL 2; Short=Os4CL2; AltName: Full=4-coumaroyl-CoA synthase 2 && PF00501:AMP-binding enzyme|PF13193:AMP-binding enzyme C-terminal domain	AMP-binding
TraesCS6A03G0750200	TraesCS6A02G281900	94.9057	99.8226	130.881	331.644	233.365	208.2	108.537	257.736	-1.24901	7.83102e-06	0.00159522	6A	-	-
TraesCS6A03G0841200	TraesCS6A02G325600	224.012	325.684	345.325	165.822	121.846	57.8898	298.34	115.186	1.37277	0.000202398	0.0206752	6A	Q08507.1 RecName: Full=1-aminocyclopropane-1-carboxylate oxidase 3; Short=ACC oxidase 3; AltName: Full=Ethylene-forming enzyme; Short=EFE && PF14226:non-haem dioxygenase in morphine synthesis N-terminal|PF03171:2OG-Fe(II) oxygenase superfamily	2OG-FeII_Oxy
TraesCS6A03G0872300	TraesCS6A02G338600	146.206	144.188	153.03	296.407	250.919	362.573	147.808	303.3	-1.03729	8.02694e-06	0.00162532	6A	Q9ST02.2 RecName: Full=Nicotianamine aminotransferase A; AltName: Full=Nicotianamine aminotransferase III; Short=NAAT-III && PF00155:Aminotransferase class I and II	Aminotran_1_2
TraesCS6A03G0875100	TraesCS6A02G339600	3.42003	4.03324	3.02034	47.6738	9.29331	47.7337	3.4912	34.9003	-3.3225	1.91828e-05	0.00330549	6A	P42813.1 RecName: Full=Ribonuclease 1; Flags: Precursor && PF00445:Ribonuclease T2 family	Ribonuclease_T2
TraesCS6A03G0907900	TraesCS6A02G353100	54.7204	88.7312	99.6711	13.473	37.1732	19.2966	81.0409	23.3143	1.79537	7.66604e-05	0.00977771	6A	-	-
TraesCS6A03G0941500	TraesCS6A02G371000	1.71001	5.04155	3.02034	26.9461	42.3362	7.10927	3.2573	25.4638	-2.98359	0.000406167	0.0353065	6A	-	-
TraesCS6A03G0963800	TraesCS6A02G380600	0	0	5.03389	23.8369	16.5214	22.3434	1.67796	20.9006	-3.68667	0.000196624	0.0202	6A	Q50EK1.1 RecName: Full=Cytochrome P450 716B1; AltName: Full=Cytochrome P450 CYPA1 && PF00067:Cytochrome P450	p450
TraesCS6A03G0970900	TraesCS6A02G384600	1696.33	1310.8	1522.25	346.153	961.341	278.277	1509.79	528.591	1.51423	0.000175068	0.0184354	6A	F4HVY0.1 RecName: Full=Protein ECERIFERUM 1 && PF12076:WAX2 C-terminal domain|PF04116:Fatty acid hydroxylase superfamily	-
TraesCS6B03G0063600	TraesCS6B02G028400	1140.58	1523.56	919.189	3056.31	6996.83	3190.03	1194.44	4414.39	-1.88591	3.53593e-08	1.78727e-05	6B	PF14368:Probable lipid transfer	-
TraesCS6B03G0127100	TraesCS6B02G054100	5.98504	4.03324	2.01356	66.3288	12.3911	92.4205	4.01061	57.0468	-3.81366	7.00454e-07	0.000222311	6B	Q9LTJ6.1 RecName: Full=WD repeat-containing protein RUP1; AltName: Full=Protein EARLY FLOWERING BY OVEREXPRESSION 1; AltName: Full=Protein REPRESSOR OF UV-B PHOTOMORPHOGENESIS 1 && -	-
TraesCS6B03G0183300	TraesCS6B02G077500	2.56502	3.02493	4.02712	24.8733	29.9451	12.1873	3.20569	22.3352	-2.80887	0.000175876	0.0184919	6B	Q9FZI8.1 RecName: Full=Lecithin-cholesterol acyltransferase-like 1 && PF02450:Lecithin:cholesterol acyltransferase	-
TraesCS6B03G0239700	TraesCS6B02G100800	18.8101	11.0914	15.1017	1.03639	0	2.03122	15.0011	1.02254	3.87211	0.000415851	0.0360565	6B	Q10FF9.1 RecName: Full=Deoxyuridine 5'-triphosphate nucleotidohydrolase; Short=dUTPase; AltName: Full=dUTP pyrophosphatase && PF04057:Replication factor-A protein 1, N-terminal domain|PF00692:dUTPase	-
TraesCS6B03G0351200	TraesCS6B02G139500	175.276	156.288	206.39	499.539	230.268	599.21	179.318	443.005	-1.30498	0.00014451	0.0159047	6B	Q2R712.1 RecName: Full=Achilleol B synthase && PF13243:Squalene-hopene cyclase C-terminal domain|PF13249:Squalene-hopene cyclase N-terminal domain	-
TraesCS6B03G0456100	TraesCS6B02G179600	18.8101	22.1828	39.2644	94.3112	50.5969	108.67	26.7524	84.5261	-1.66537	0.000147729	0.016129	6B	Q6ETN2.1 RecName: Full=CASP-like protein 2C2; Short=OsCASPL2C2 && PF04535:Domain of unknown function (DUF588)	-
TraesCS6B03G0517400	TraesCS6B02G201300	33.3452	23.1911	42.2847	3.10916	3.09777	2.03122	32.9404	2.74605	3.5862	5.00124e-07	0.000165991	6B	A3BI11.1 RecName: Full=Zinc transporter 8; AltName: Full=ZRT/IRT-like protein 8; Short=OsZIP8; Flags: Precursor && PF02535:ZIP Zinc transporter	-
TraesCS6B03G0538900	TraesCS6B02G206000	7.69506	7.05817	9.06101	58.0377	10.3259	92.4205	7.93808	53.5947	-2.75625	9.73528e-05	0.0117978	6B	-	-
TraesCS6B03G0559300	TraesCS6B02G209600	70.9655	76.6315	202.363	508.866	219.942	284.371	116.653	337.726	-1.53528	0.000525293	0.043186	6B	O24646.1 RecName: Full=Transcription factor HY5; AltName: Full=Protein LONG HYPOCOTYL 5; AltName: Full=bZIP transcription factor 56; Short=AtbZIP56 && PF00170:bZIP transcription factor	bZIP_1
TraesCS6B03G0628000	TraesCS6B02G227900	324.902	161.33	369.488	66.3288	137.334	107.655	285.24	103.773	1.45904	9.75129e-05	0.0117978	6B	Q9XI73.1 RecName: Full=Photosynthetic NDH subunit of lumenal location 2, chloroplastic; AltName: Full=PsbQ-like protein 1; Flags: Precursor && PF05757:Oxygen evolving enhancer protein 3 (PsbQ)	-
TraesCS6B03G0684100	TraesCS6B02G236200	29.0702	26.216	50.3389	9.32748	6.19554	4.06244	35.2084	6.52849	2.43106	4.46186e-05	0.00632981	6B	Q8LGS1.2 RecName: Full=Protein MARD1; AltName: Full=Mediator of ABA-regulated dormancy1; AltName: Full=Senescence-associated protein SAG102 && PF04570:zinc-finger of the FCS-type, C2-C2	-
TraesCS6B03G0723800	TraesCS6B02G246500	1.71001	6.04986	7.04745	69.4379	16.5214	49.7649	4.93577	45.2414	-3.21893	5.50952e-06	0.0012286	6B	Q9SID1.2 RecName: Full=B-box zinc finger protein 25; AltName: Full=Protein SALT TOLERANCE HOMOLOG 1; AltName: Full=Salt tolerance-like protein && PF00643:B-box zinc finger	zf-B_box
TraesCS6B03G0800300	TraesCS6B02G275700	70.9655	75.6232	129.874	353.408	180.703	322.964	92.1544	285.692	-1.63437	2.72156e-06	0.000677778	6B	Q6H676.1 RecName: Full=Expansin-B11; AltName: Full=Beta-expansin-11; AltName: Full=OsEXPB11; AltName: Full=OsaEXPb1.20; Flags: Precursor && PF03330:Rare lipoprotein A (RlpA)-like double-psi beta-barrel|PF01357:Pollen allergen	-
TraesCS6B03G0915700	TraesCS6B02G321400	38.4753	39.3241	45.3051	6.21832	14.4563	11.1717	41.0348	10.6154	1.94934	7.00924e-05	0.00918022	6B	Q8S528.2 RecName: Full=Aldehyde dehydrogenase family 2 member B7, mitochondrial; Short=ALDH2b; Flags: Precursor && PF00171:Aldehyde dehydrogenase family	Aldedh
TraesCS6B03G0997900	TraesCS6B02G354600	578.839	602.969	861.803	1485.14	948.95	2188.64	681.204	1540.91	-1.17788	0.000185456	0.0192617	6B	Q9LXG3.1 RecName: Full=Peroxidase 56; Short=Atperox P56; AltName: Full=ATP33; Flags: Precursor && PF00141:Peroxidase	-
TraesCS6B03G1042200	TraesCS6B02G368500	35.9103	40.3324	61.4135	122.294	205.485	179.763	45.8854	169.181	-1.88647	2.01224e-08	1.08118e-05	6B	Q9LVJ1.1 RecName: Full=Subtilisin-like protease SBT1.4; AltName: Full=Subtilase subfamily 1 member 4; Short=AtSBT1.4; Flags: Precursor && PF05922:Peptidase inhibitor I9|PF00082:Subtilase family|PF02225:PA domain	Peptidase_S8
TraesCS6B03G1077800	TraesCS6B02G381500	9.40507	6.04986	5.03389	35.2372	29.9451	26.4059	6.82961	30.5294	-2.14535	0.000124397	0.0141711	6B	Q10FF9.1 RecName: Full=Deoxyuridine 5'-triphosphate nucleotidohydrolase; Short=dUTPase; AltName: Full=dUTP pyrophosphatase && PF00692:dUTPase	-
TraesCS6B03G1090600	TraesCS6B02G385800	32.4902	77.6398	79.5355	18.655	22.717	7.10927	63.2219	16.1604	1.96614	0.000231091	0.0228205	6B		-
TraesCS6B03G1137900	TraesCS6B02G402600	527.539	451.723	609.101	1464.41	1543.72	1578.26	529.454	1528.8	-1.52984	2.91897e-16	1.04832e-12	6B	Q9FZP1.2 RecName: Full=Heparanase-like protein 3; Flags: Precursor && PF03662:Glycosyl hydrolase family 79, N-terminal domain	-
TraesCS6B03G1146700	TraesCS6B02G406000	3.42003	4.03324	7.04745	42.4919	14.4563	82.2644	4.83357	46.4042	-3.27332	6.0928e-06	0.00132406	6B	Q0J6T3.2 RecName: Full=Probable cinnamyl alcohol dehydrogenase 5; Short=OsCAD5 && PF08240:Alcohol dehydrogenase GroES-like domain|PF00107:Zinc-binding dehydrogenase	ADH_N
TraesCS6B03G1159900	TraesCS6B02G411300	51.3004	71.59	74.5016	19.6914	36.1406	15.2342	65.7973	23.6887	1.47248	0.000591195	0.0472381	6B	Q9FUA4.1 RecName: Full=Transcription factor SPATULA; AltName: Full=Basic helix-loop-helix protein 24; Short=AtbHLH24; Short=bHLH 24; AltName: Full=Transcription factor EN 99; AltName: Full=bHLH transcription factor bHLH024 && PF00010:Helix-loop-helix DNA-binding domain	HLH
TraesCS6B03G1210400	TraesCS6B02G432300	58.1404	41.3407	119.807	6.21832	18.5866	7.10927	73.0959	10.6381	2.78019	1.40733e-06	0.000403494	6B	Q58821.1 RecName: Full=Uncharacterized protein MJ1426 && PF00571:CBS domain	CBS
TraesCS6D03G0011000	TraesCS6D02G004300	4.27503	2.01662	8.05423	115.039	20.6518	359.526	4.78196	165.072	-5.11084	1.31609e-05	0.00241413	6D	P41213.1 RecName: Full=Leucoanthocyanidin dioxygenase; Short=LDOX; Short=Leucocyanidin oxygenase; AltName: Full=Leucoanthocyanidin hydroxylase && PF14226:non-haem dioxygenase in morphine synthesis N-terminal|PF03171:2OG-Fe(II) oxygenase superfamily	2OG-FeII_Oxy
TraesCS6D03G0019200	TraesCS6D02G009200	846.456	727.999	1015.84	415.591	569.99	230.544	863.432	405.375	1.09092	0.000637859	0.0498004	6D	-	-
TraesCS6D03G0024100	TraesCS6D02G010500	3.42003	11.0914	16.1085	102.602	56.7924	53.8273	10.2066	71.074	-2.81917	2.13669e-07	8.28416e-05	6D	-	-
TraesCS6D03G0085600	TraesCS6D02G043000	62.4155	61.5069	142.963	433.21	130.106	561.632	88.9617	374.983	-2.07698	2.55696e-05	0.00409575	6D	O80437.1 RecName: Full=Glycerol-3-phosphate 2-O-acyltransferase 6; Short=AtGPAT6; AltName: Full=Glycerol-3-phosphate acyltransferase 6 && PF01553:Acyltransferase	Acyltransferase
TraesCS6D03G0093700	TraesCS6D02G045000	8.55006	5.04155	13.0881	233.187	38.2058	312.808	8.89325	194.734	-4.45355	6.92312e-12	9.64107e-09	6D	Q9LTJ6.1 RecName: Full=WD repeat-containing protein RUP1; AltName: Full=Protein EARLY FLOWERING BY OVEREXPRESSION 1; AltName: Full=Protein REPRESSOR OF UV-B PHOTOMORPHOGENESIS 1 && -	-
TraesCS6D03G0283500	TraesCS6D02G127800	1346.64	955.877	1420.57	2555.73	3483.96	1809.82	1241.03	2616.5	-1.076	0.000114	0.0133203	6D	Q06398.2 RecName: Full=Probable glutathione S-transferase GSTU6; AltName: Full=28 kDa cold-induced protein && PF13410:Glutathione S-transferase, C-terminal domain|PF02798:Glutathione S-transferase, N-terminal domain	GST_N
TraesCS6D03G0310400	TraesCS6D02G139000	9.40507	15.1246	29.1966	66.3288	56.7924	95.4674	17.9088	72.8629	-2.03574	1.65804e-05	0.00296178	6D	F4INN2.1 RecName: Full=Gamma-glutamyl peptidase 4 && PF00117:Glutamine amidotransferase class-I	GATase
TraesCS6D03G0376300	TraesCS6D02G167800	77.8056	31.2576	84.5694	308.843	129.074	307.73	64.5442	248.549	-1.94352	7.16549e-06	0.00149771	6D	O24646.1 RecName: Full=Transcription factor HY5; AltName: Full=Protein LONG HYPOCOTYL 5; AltName: Full=bZIP transcription factor 56; Short=AtbZIP56 && PF00170:bZIP transcription factor	bZIP_1
TraesCS6D03G0493600	TraesCS6D02G199200	31.6352	50.4155	57.3864	275.679	103.259	273.199	46.479	217.379	-2.22948	7.70323e-08	3.53165e-05	6D	Q9SID1.2 RecName: Full=B-box zinc finger protein 25; AltName: Full=Protein SALT TOLERANCE HOMOLOG 1; AltName: Full=Salt tolerance-like protein && PF00643:B-box zinc finger	zf-B_box
TraesCS6D03G0520200	TraesCS6D02G209700	0.855006	62.5152	4.02712	0	0	1.01561	22.4658	0.338537	5.92764	0.000523731	0.0431292	6D	Q7XRS1.2 RecName: Full=Protein G1-like4 >A2XVI8.1 RecName: Full=Protein G1-like4 && PF04852:Protein of unknown function (DUF640)	-
TraesCS6D03G0524300	TraesCS6D02G211600	30.7802	34.2825	47.3186	0	5.16295	0	37.4605	1.72098	4.4472	2.87913e-07	0.000103949	6D	Q01MW8.2 RecName: Full=Probable inorganic phosphate transporter 1-4; Short=OsPT4; Short=OsPht1;4; AltName: Full=H(+)/Pi cotransporter; AltName: Full=OsPT1 && PF00083:Sugar (and other) transporter	Sugar_tr
TraesCS6D03G0524500	TraesCS6D02G211700	552.334	539.446	755.084	260.133	327.331	208.2	615.621	265.221	1.21471	1.5458e-06	0.000430533	6D	Q96524.2 RecName: Full=Cryptochrome-2; Short=Atcry2; AltName: Full=Blue light photoreceptor; AltName: Full=Protein PHR homolog 1; Short=AtPHH1; AltName: Full=Protein SUPPRESSOR OF elf3 20 && PF00875:DNA photolyase|PF03441:FAD binding domain of DNA photolyase	-
TraesCS6D03G0527700	TraesCS6D02G212900	1081.58	1028.48	1516.21	3013.81	1487.96	3124.02	1208.76	2541.93	-1.0725	0.000452996	0.0385436	6D	Q6K215.1 RecName: Full=Probable aquaporin PIP2-2; AltName: Full=OsPIP2;2; AltName: Full=Plasma membrane intrinsic protein 2-2 && PF00230:Major intrinsic protein	-
TraesCS6D03G0540200	TraesCS6D02G220400	47.0254	66.5484	45.3051	7.25471	22.717	18.281	52.9596	16.0842	1.71746	0.000369276	0.0328531	6D	Q6H668.1 RecName: Full=Protein YABBY 4; AltName: Full=OsYAB7; AltName: Full=OsYABBY4 >A2X7Q3.1 RecName: Full=Protein YABBY 4; AltName: Full=OsYAB7; AltName: Full=OsYABBY4 && PF04690:YABBY protein	YABBY
TraesCS6D03G0546700	TraesCS6D02G223200	0	0	3.02034	32.128	20.6518	23.359	1.00678	25.3796	-4.71967	5.34052e-06	0.00120212	6D	Q6H3Z3.1 RecName: Full=Iron-phytosiderophore transporter YSL15; AltName: Full=Protein YELLOW STRIPE LIKE 15; Short=OsYSL15 && PF03169:OPT oligopeptide transporter protein	OPT
TraesCS6D03G0578400	TraesCS6D02G236800	93.1957	90.7479	198.335	47.6738	49.5643	39.6088	127.426	45.6156	1.48076	0.000131781	0.0148144	6D	-	-
TraesCS6D03G0591000	TraesCS6D02G242700	47.8804	25.2077	42.2847	107.784	164.182	90.3893	38.4576	120.785	-1.64658	1.07669e-05	0.00205223	6D	PF04570:zinc-finger of the FCS-type, C2-C2	-
TraesCS6D03G0616400	TraesCS6D02G255600	5.98504	1.00831	1.00678	96.384	66.0858	71.0927	2.66671	77.8542	-4.79504	4.63725e-14	1.17197e-10	6D	-	-
TraesCS6D03G0712900	TraesCS6D02G305200	65.8355	99.8226	95.644	38.3463	41.3036	32.4995	87.1007	37.3831	1.2178	0.00030074	0.0282278	6D	A2Z1W9.1 RecName: Full=1-aminocyclopropane-1-carboxylate oxidase 1; Short=ACC oxidase 1; AltName: Full=Ethylene-forming enzyme; Short=EFE && PF03171:2OG-Fe(II) oxygenase superfamily|PF14226:non-haem dioxygenase in morphine synthesis N-terminal	2OG-FeII_Oxy
TraesCS6D03G0730200	TraesCS6D02G313500	2.56502	0	0	14.5094	26.8473	40.6244	0.855006	27.3271	-4.88023	5.80633e-06	0.00127404	6D	P04063.3 RecName: Full=Alpha-amylase type B isozyme; AltName: Full=1,4-alpha-D-glucan glucanohydrolase; AltName: Full=AMY2-2; AltName: Full=High pI alpha-amylase; Flags: Precursor && PF07821:Alpha-amylase C-terminal beta-sheet domain|PF00128:Alpha amylase, catalytic domain	-
TraesCS6D03G0742500	TraesCS6D02G318700	9.40507	10.0831	32.2169	48.7102	82.6072	153.357	17.235	94.8915	-2.46881	1.47251e-05	0.00266525	6D	Q9LVJ1.1 RecName: Full=Subtilisin-like protease SBT1.4; AltName: Full=Subtilase subfamily 1 member 4; Short=AtSBT1.4; Flags: Precursor && PF02225:PA domain|PF05922:Peptidase inhibitor I9|PF00082:Subtilase family	Peptidase_S8
TraesCS6D03G0872600	TraesCS6D02G378000	23.0852	31.2576	54.3661	0	11.3585	1.01561	36.2363	4.1247	3.135	0.000342587	0.0311695	6D	Q58821.1 RecName: Full=Uncharacterized protein MJ1426 && PF00571:CBS domain	CBS
TraesCS6D03G0887100	TraesCS6D02G386300	195.796	133.097	187.261	522.339	544.175	438.744	172.051	501.753	-1.54262	4.03848e-11	4.37419e-08	6D	Q9SRQ1.1 RecName: Full=Cytochrome P450 89A9 && PF00067:Cytochrome P450	p450
TraesCS6D03G0920500	TraesCS6D02G402500	41.0403	39.3241	66.4474	16.5822	17.554	13.2029	48.9373	15.7797	1.63143	0.000271069	0.0260415	6D	P09189.1 RecName: Full=Heat shock cognate 70 kDa protein && PF10712:NAD-specific glutamate dehydrogenase|PF00012:Hsp70 protein	HSP70
TraesCS6D03G0923100	TraesCS6D02G403400	82.9356	77.6398	107.725	39.3827	34.0755	34.5307	89.4336	35.9963	1.31225	5.01003e-05	0.00697693	6D	-	-
TraesCS7A03G0021000	TraesCS7A02G010300	3343.07	2509.68	3251.9	7253.67	7415.03	6154.6	3034.88	6941.1	-1.19342	5.79017e-10	4.59423e-07	7A	Q55874.1 RecName: Full=Uncharacterized protein sll0103 && PF14624:VWA / Hh protein intein-like|PF00092:von Willebrand factor type A domain	VWA
TraesCS7A03G0147000	TraesCS7A02G065100	10.2601	26.216	44.2983	120.221	73.3139	152.342	26.9248	115.292	-2.1075	1.8911e-05	0.00327521	7A	PF03760:Late embryogenesis abundant (LEA) group 1	-
TraesCS7A03G0367500	TraesCS7A02G157500	52.1554	56.4653	76.5152	26.9461	12.3911	9.14049	61.712	16.1592	1.93345	4.95333e-05	0.00691207	7A	-	-
TraesCS7A03G0422700	TraesCS7A02G180900	92.3407	46.3822	34.2305	8.2911	12.3911	6.09366	57.6511	8.92528	2.69671	1.47599e-06	0.000416186	7A	Q8H1E4.1 RecName: Full=Ethylene-responsive transcription factor RAP2-4; AltName: Full=Ethylene-responsive transcription factor ERF059; AltName: Full=Protein RELATED TO APETALA2 4 && PF00847:AP2 domain	AP2
TraesCS7A03G0476000	TraesCS7A02G203100	11.1151	14.1163	51.3457	159.604	57.825	179.763	25.5257	132.397	-2.38115	4.61576e-05	0.00653456	7A	Q9CAB8.1 RecName: Full=Probable peroxygenase 5; Short=AtPXG5; AltName: Full=Caleosin-5 && PF05042:Caleosin related protein	-
TraesCS7A03G0647200	TraesCS7A02G278400	54.7204	44.3656	97.6576	223.86	98.096	221.403	65.5812	181.12	-1.4671	0.000349171	0.0315581	7A	Q8H5F8.1 RecName: Full=Manganese-dependent ADP-ribose/CDP-alcohol diphosphatase; AltName: Full=ADPRibase-Mn; AltName: Full=CDP-choline phosphohydrolase && PF00149:Calcineurin-like phosphoesterase	Metallophos
TraesCS7A03G0653600	TraesCS7A02G280400	101.746	87.7229	84.5694	42.4919	52.6621	33.5151	91.346	42.8897	1.09261	0.00061587	0.0485839	7A	-	-
TraesCS7A03G0826400	TraesCS7A02G336200	17.9551	22.1828	40.2712	102.602	54.7273	135.076	26.803	97.4686	-1.8684	4.0152e-05	0.00585439	7A	Q40541.1 RecName: Full=Mitogen-activated protein kinase kinase kinase NPK1; AltName: Full=Nicotiana protein kinase 1 && PF00069:Protein kinase domain	Pkinase
TraesCS7A03G0834800	TraesCS7A02G339400	36.7653	59.4903	64.4339	102.602	99.1286	189.919	53.5631	130.55	-1.28968	0.000602851	0.0476671	7A	Q94CH8.1 RecName: Full=GDSL esterase/lipase EXL1; AltName: Full=Family II extracellular lipase 1; Short=Family II lipase EXL1; Flags: Precursor && PF00657:GDSL-like Lipase/Acylhydrolase	Lipase_GDSL
TraesCS7A03G0859600	TraesCS7A02G351900	2.56502	5.04155	5.03389	72.5471	20.6518	58.9054	4.21349	50.7014	-3.60559	7.74206e-08	3.53165e-05	7A	-	-
TraesCS7A03G0886600	TraesCS7A02G363000	354.828	297.451	373.515	961.767	937.592	1469.59	341.931	1122.98	-1.71543	2.03111e-12	3.22318e-09	7A	Q9SJL9.1 RecName: Full=Probable xyloglucan endotransglucosylase/hydrolase protein 32; Short=At-XTH32; Short=XTH-32; Flags: Precursor && PF00722:Glycosyl hydrolases family 16|PF06955:Xyloglucan endo-transglycosylase (XET) C-terminus	-
TraesCS7A03G0891900	TraesCS7A02G365200	23.9402	16.133	22.1491	188.622	43.3688	183.825	20.7408	138.606	-2.73795	1.5314e-07	6.13717e-05	7A	PF07343:Protein of unknown function (DUF1475)	-
TraesCS7A03G0905400	TraesCS7A02G371600	2.56502	1.00831	9.06101	29.0188	15.4888	53.8273	4.21145	32.7783	-2.97349	0.000155502	0.0168084	7A	Q9SLP4.1 RecName: Full=Chitinase 1; AltName: Full=Tulip bulb chitinase-1; Short=TBC-1; Flags: Precursor && PF00704:Glycosyl hydrolases family 18	-
TraesCS7A03G0910000	TraesCS7A02G373800	12.8251	13.108	26.1763	108.821	26.8473	99.5298	17.3698	78.3993	-2.17882	0.000103834	0.0123869	7A	Q9SM50.1 RecName: Full=Transcription factor HY5; AltName: Full=LeHY5; AltName: Full=tHY5 && PF00170:bZIP transcription factor	bZIP_1
TraesCS7A03G1035500	TraesCS7A02G426600	786.606	818.747	1389.35	358.59	531.784	340.229	998.236	410.201	1.28284	1.29388e-05	0.00238623	7A	Q38910.1 RecName: Full=Probable xyloglucan endotransglucosylase/hydrolase protein 23; Short=At-XTH23; Short=XTH-23; Flags: Precursor && PF00722:Glycosyl hydrolases family 16|PF06955:Xyloglucan endo-transglycosylase (XET) C-terminus	-
TraesCS7A03G1036400	TraesCS7A02G427000	242.822	217.795	430.901	881.965	567.924	1113.11	297.173	854.333	-1.52408	4.7055e-06	0.00107748	7A	Q38910.1 RecName: Full=Probable xyloglucan endotransglucosylase/hydrolase protein 23; Short=At-XTH23; Short=XTH-23; Flags: Precursor && PF06955:Xyloglucan endo-transglycosylase (XET) C-terminus|PF00722:Glycosyl hydrolases family 16	-
TraesCS7A03G1149600	TraesCS7A02G474700	281.297	270.227	452.044	808.382	567.924	762.723	334.523	713.01	-1.09247	5.28124e-05	0.00726565	7A	Q94F40.1 RecName: Full=GDSL esterase/lipase At1g28600; AltName: Full=Extracellular lipase At1g28600; Flags: Precursor && PF00657:GDSL-like Lipase/Acylhydrolase	Lipase_GDSL
TraesCS7A03G1156600	TraesCS7A02G477900	700.25	875.213	950.399	2518.42	1961.92	1798.65	841.954	2093	-1.31416	1.52926e-09	1.05407e-06	7A	Q06398.2 RecName: Full=Probable glutathione S-transferase GSTU6; AltName: Full=28 kDa cold-induced protein && PF13417:Glutathione S-transferase, N-terminal domain	-
TraesCS7A03G1158600	TraesCS7A02G478700	6.84005	2.01662	16.1085	70.4743	19.6192	63.9834	8.32171	51.359	-2.62962	0.000150026	0.0163144	7A	Q9LIE6.1 RecName: Full=VQ motif-containing protein 22; Short=AtVQ22 && PF05678:VQ motif	-
TraesCS7A03G1165800	TraesCS7A02G481400	68.4005	98.8143	74.5016	36.2735	32.0103	32.4995	80.5722	33.5945	1.26025	0.00018135	0.0189507	7A	Q9T070.1 RecName: Full=Cytochrome c oxidase subunit 6a, mitochondrial; Short=AtCOX6a; Flags: Precursor && -	-
TraesCS7A03G1199600	TraesCS7A02G494700	137.656	105.873	182.227	307.807	287.06	283.355	141.919	292.741	-1.04482	4.887e-05	0.00684525	7A	-	-
TraesCS7A03G1203000	TraesCS7A02G496400	206.057	180.487	254.715	552.394	352.113	564.679	213.753	489.729	-1.19631	6.02218e-06	0.00131289	7A	Q67W83.1 RecName: Full=CASP-like protein 2C1; Short=OsCASPL2C1 && PF04535:Domain of unknown function (DUF588)	-
TraesCS7A03G1236200	TraesCS7A02G508800	4.27503	3.02493	6.04067	22.8005	21.6844	31.4839	4.44688	25.3229	-2.51155	9.77859e-05	0.0118099	7A	B8B0R8.2 RecName: Full=WRKY transcription factor WRKY28; Short=OsWRKY28 && PF03106:WRKY DNA -binding domain	WRKY
TraesCS7A03G1311000	TraesCS7A02G538400	5.13004	7.05817	4.02712	41.4555	33.0429	47.7337	5.40511	40.744	-2.91694	1.48995e-07	6.01597e-05	7A	Q9FH13.1 RecName: Full=Putative 4-hydroxy-4-methyl-2-oxoglutarate aldolase 3; Short=HMG aldolase 3; AltName: Full=Oxaloacetate decarboxylase; Short=OAA decarboxylase; AltName: Full=Regulator of ribonuclease activity homolog 3; AltName: Full=RraA-like protein 3 && PF03737:Demethylmenaquinone methyltransferase	-
TraesCS7B03G0000200	TraesCS7B02G000200	5.13004	19.1579	35.2373	75.6563	51.6295	120.858	19.8417	82.7145	-2.07044	0.000372314	0.0330372	7B	Q8GU84.1 RecName: Full=ABC transporter G family member 48; Short=OsABCG48; AltName: Full=Pleiotropic drug resistance protein 3; Short=OsPDR3 && PF08370:Plant PDR ABC transporter associated|PF01061:ABC-2 type transporter|PF00005:ABC transporter|PF14510:ABC-transporter extracellular N-terminal	ABC2_membrane
TraesCS7B03G0071600	TraesCS7B02G026100	206.057	172.421	343.312	850.874	384.123	684.521	240.596	639.84	-1.41157	5.68848e-05	0.0077437	7B	PF02622:Uncharacterized ACR, COG1678	-
TraesCS7B03G0110500	TraesCS7B02G041600	109.441	140.155	173.166	502.648	244.724	523.039	140.921	423.47	-1.58886	1.65823e-06	0.00045261	7B	Q39224.1 RecName: Full=Protein SRG1; Short=AtSRG1; AltName: Full=Protein SENESCENCE-RELATED GENE 1 && PF03171:2OG-Fe(II) oxygenase superfamily|PF14226:non-haem dioxygenase in morphine synthesis N-terminal	2OG-FeII_Oxy
TraesCS7B03G0121800	TraesCS7B02G045700	1.71001	3.02493	2.01356	20.7277	21.6844	22.3434	2.2495	21.5852	-3.27569	2.45203e-05	0.00395268	7B	-	-
TraesCS7B03G0164200	TraesCS7B02G061800	239.402	226.87	220.485	64.256	109.455	39.6088	228.919	71.1064	1.68747	1.57558e-06	0.000437044	7B	-	-
TraesCS7B03G0225000	TraesCS7B02G084300	20.5202	72.5983	110.746	3.10916	10.3259	1.01561	67.9547	4.81689	3.81837	5.71918e-07	0.000187625	7B	Q9ZPE7.1 RecName: Full=Protein EXORDIUM; Flags: Precursor && PF04674:Phosphate-induced protein 1 conserved region	-
TraesCS7B03G0246800	TraesCS7B02G092900	594.229	437.606	448.017	1208.43	1784.32	728.193	493.284	1240.31	-1.32976	3.0748e-05	0.00471884	7B	Q67WJ8.1 RecName: Full=Aquaporin NIP2-2; AltName: Full=NOD26-like intrinsic protein 2-2; AltName: Full=OsNIP2;2 && PF00230:Major intrinsic protein	-
TraesCS7B03G0249500	TraesCS7B02G094400	0.855006	0	1.00678	24.8733	2.06518	44.6869	0.620595	23.8751	-5.2443	0.000146055	0.0159718	7B	Q9ZQ94.1 RecName: Full=UDP-glycosyltransferase 73C5; AltName: Full=Cytokinin-O-glucosyltransferase 3; AltName: Full=Deoxynivalenol-glucosyl-transferase 1; AltName: Full=Zeatin O-glucosyltransferase 3; Short=AtZOG3 && PF00201:UDP-glucoronosyl and UDP-glucosyl transferase	UDPGT
TraesCS7B03G0289500	TraesCS7B02G110300	30.7802	35.2908	119.807	461.192	155.921	234.606	61.9593	283.906	-2.19885	3.04675e-05	0.00470365	7B	Q9CAB8.1 RecName: Full=Probable peroxygenase 5; Short=AtPXG5; AltName: Full=Caleosin-5 && PF05042:Caleosin related protein	-
TraesCS7B03G0313400	TraesCS7B02G120900	1.71001	2.01662	4.02712	425.955	17.554	459.056	2.58458	300.855	-6.87003	9.65588e-08	4.17018e-05	7B	P14897.1 RecName: Full=Low molecular mass early light-inducible protein HV90, chloroplastic; Short=ELIP; Flags: Precursor && PF00504:Chlorophyll A-B binding protein	-
TraesCS7B03G0445800	TraesCS7B02G164800	0	0	0	91.2021	88.8027	97.4986	0	92.5011	-9.04224	1.64496e-13	3.40143e-10	7B	-	-
TraesCS7B03G0471200	TraesCS7B02G175800	29.9252	34.2825	29.1966	123.33	43.3688	109.686	31.1348	92.1282	-1.56585	0.000314578	0.0292053	7B	Q8H5F8.1 RecName: Full=Manganese-dependent ADP-ribose/CDP-alcohol diphosphatase; AltName: Full=ADPRibase-Mn; AltName: Full=CDP-choline phosphohydrolase && PF00149:Calcineurin-like phosphoesterase	Metallophos
TraesCS7B03G0654200	TraesCS7B02G232700	365.943	338.792	480.234	904.766	648.466	947.564	394.989	833.599	-1.07788	7.1772e-06	0.00149771	7B	Q94BN2.1 RecName: Full=Spermine synthase; Short=SPMSY; AltName: Full=Spermidine aminopropyltransferase && PF01564:Spermine/spermidine synthase	-
TraesCS7B03G0662200	TraesCS7B02G237100	50.4454	44.3656	93.6304	187.586	228.202	204.138	62.8138	206.642	-1.72077	1.34571e-07	5.53176e-05	7B	-	-
TraesCS7B03G0671600	TraesCS7B02G241400	4.27503	4.03324	3.02034	19.6914	46.4665	19.2966	3.7762	28.4848	-2.90935	3.91589e-05	0.00573409	7B	O23086.2 RecName: Full=Aluminum-activated malate transporter 10; Short=AtALMT10 && PF11744:Aluminium activated malate transporter	-
TraesCS7B03G0720900	TraesCS7B02G262100	80.3706	64.5318	90.6101	243.551	88.8027	298.589	78.5042	210.314	-1.42164	0.00060564	0.0478323	7B	PF07343:Protein of unknown function (DUF1475)	-
TraesCS7B03G0727400	TraesCS7B02G265000	93.1957	62.5152	76.5152	218.678	287.06	658.115	77.4087	387.951	-2.32386	8.26087e-09	4.90171e-06	7B	Q9SJL9.1 RecName: Full=Probable xyloglucan endotransglucosylase/hydrolase protein 32; Short=At-XTH32; Short=XTH-32; Flags: Precursor && PF06955:Xyloglucan endo-transglycosylase (XET) C-terminus|PF00722:Glycosyl hydrolases family 16	-
TraesCS7B03G0776500	TraesCS7B02G286300	358.248	338.792	409.759	153.385	255.05	143.201	368.933	183.879	1.00464	0.000270264	0.0260415	7B	Q0IGM7.1 RecName: Full=B-box zinc finger protein 20; AltName: Full=Protein BZR1 SUPPRESSOR 1; AltName: Full=Protein DOUBLE B-BOX 2; AltName: Full=Protein SALT TOLERANCE HOMOLOG 7 && -	-
TraesCS7B03G0780400	TraesCS7B02G287900	39.3303	36.2991	43.2915	123.33	87.7701	97.4986	39.6403	102.866	-1.37578	9.33981e-06	0.00183666	7B	Q9LNK1.1 RecName: Full=Ras-related protein RABA3; Short=AtRABA3 && PF00071:Ras family	Ras
TraesCS7B03G0876600	TraesCS7B02G326900	154.756	186.537	292.973	57.0013	113.585	66.0147	211.422	78.8669	1.42171	8.10752e-05	0.0102261	7B	Q38907.2 RecName: Full=Probable xyloglucan endotransglucosylase/hydrolase protein 25; Short=At-XTH25; Short=XTH-25; Flags: Precursor && PF00722:Glycosyl hydrolases family 16|PF06955:Xyloglucan endo-transglycosylase (XET) C-terminus	-
TraesCS7B03G0881800	TraesCS7B02G328400	580.549	530.371	673.535	282.934	366.569	217.341	594.818	288.948	1.04173	2.67202e-05	0.00423041	7B	Q96518.2 RecName: Full=Peroxidase 16; Short=Atperox P16; AltName: Full=ATP22a; Flags: Precursor && PF00141:Peroxidase	-
TraesCS7B03G1058100	TraesCS7B02G392900	35.0553	45.3739	66.4474	253.915	64.0206	225.465	48.9589	181.134	-1.88993	7.99231e-05	0.0101559	7B	Q651U1.1 RecName: Full=Cryptochrome DASH, chloroplastic/mitochondrial; Flags: Precursor && PF03441:FAD binding domain of DNA photolyase|PF00875:DNA photolyase	-
TraesCS7B03G1227900	TraesCS7B02G455100	14.5351	12.0997	14.0949	407.3	27.8799	234.606	13.5766	223.262	-4.03899	3.07469e-05	0.00471884	7B	Q5SMM6.1 RecName: Full=Hydroxycinnamoyltransferase 4; Short=OsHCT4; AltName: Full=BAHD-like hydroxycinnamoyl transferase HCT4; AltName: Full=Glycerol hydroxycinnamoyl transferase && PF02458:Transferase family	-
TraesCS7B03G1257900	TraesCS7B02G467100	1244.89	1531.62	2381.03	3211.76	2664.08	4847.51	1719.18	3574.45	-1.05619	0.000566543	0.045859	7B	Q8LB81.1 RecName: Full=GDSL esterase/lipase At5g33370; AltName: Full=Extracellular lipase At5g33370; Flags: Precursor && PF00657:GDSL-like Lipase/Acylhydrolase	Lipase_GDSL
TraesCS7B03G1305200	TraesCS7B02G484900	0	2.01662	4.02712	18.655	18.5866	23.359	2.01458	20.2002	-3.37734	0.000110237	0.0129693	7B	P46526.1 RecName: Full=Cold shock protein CS66 && PF00257:Dehydrin	-
TraesCS7D03G0023900	TraesCS7D02G010200	599.359	357.95	546.681	1135.88	1223.62	885.612	501.33	1081.7	-1.10882	1.18779e-05	0.00224519	7D	Q55874.1 RecName: Full=Uncharacterized protein sll0103 && PF14624:VWA / Hh protein intein-like|PF00092:von Willebrand factor type A domain	VWA
TraesCS7D03G0112500	TraesCS7D02G050500	8.55006	9.07479	16.1085	107.784	32.0103	98.5142	11.2444	79.4362	-2.82694	2.49479e-07	9.28783e-05	7D	D4N502.1 RecName: Full=Codeine O-demethylase && PF03171:2OG-Fe(II) oxygenase superfamily|PF14226:non-haem dioxygenase in morphine synthesis N-terminal	2OG-FeII_Oxy
TraesCS7D03G0128300	TraesCS7D02G057000	94.0507	65.5401	85.5762	247.697	222.007	186.872	81.7223	218.859	-1.41846	6.28055e-08	2.95563e-05	7D	Q07469.1 RecName: Full=Bark storage protein A; Flags: Precursor [Populus deltoides] && PF01048:Phosphorylase superfamily	-
TraesCS7D03G0182600	TraesCS7D02G079900	26.5052	30.2493	28.1898	84.9837	47.4991	87.3425	28.3148	73.2751	-1.37342	0.000330781	0.0304609	7D	-	-
TraesCS7D03G0216800	TraesCS7D02G095500	2.56502	8.06648	13.0881	109.857	17.554	117.811	7.90654	81.7406	-3.38526	2.18677e-06	0.000567371	7D	Q6YTF5.1 RecName: Full=Cytochrome P450 76M5 && PF00067:Cytochrome P450	p450
TraesCS7D03G0217000	TraesCS7D02G095700	0.855006	10.0831	2.01356	109.857	14.4563	77.1864	4.31722	67.1666	-3.98321	1.90763e-06	0.00051451	7D	Q6YTF5.1 RecName: Full=Cytochrome P450 76M5 && PF00067:Cytochrome P450	p450
TraesCS7D03G0243800	TraesCS7D02G107900	15.3901	17.1413	23.1559	120.221	32.0103	57.8898	18.5624	70.0403	-1.9187	0.000265677	0.0257149	7D	Q8LL69.1 RecName: Full=3'-N-debenzoyl-2'-deoxytaxol N-benzoyltransferase; Short=DBTNBT && PF02458:Transferase family	-
TraesCS7D03G0268900	TraesCS7D02G120000	24.7952	47.3905	23.1559	0	0	0	31.7805	0	7.39077	2.13719e-08	1.13934e-05	7D	-	-
TraesCS7D03G0322700	TraesCS7D02G143500	0	6.04986	1.00678	38.3463	67.1183	37.5776	2.35221	47.6807	-4.39519	1.72498e-08	9.49254e-06	7D	P68427.2 RecName: Full=Histone H3.2 >P68428.2 RecName: Full=Histone H3.2 >P68429.2 RecName: Full=Histone H3.2; AltName: Full=Histone H3.1; AltName: Full=Major histone H3 >P68430.2 RecName: Full=Histone H3.2 && PF00125:Core histone H2A/H2B/H3/H4	Histone
TraesCS7D03G0388400	TraesCS7D02G171300	41.0403	44.3656	51.3457	208.314	92.9331	104.608	45.5839	135.285	-1.57064	3.56732e-05	0.00532655	7D	Q9M7Q4.1 RecName: Full=ABSCISIC ACID-INSENSITIVE 5-like protein 5; AltName: Full=ABA-responsive element-binding protein 1; AltName: Full=Abscisic acid responsive elements-binding factor 2; Short=ABRE-binding factor 2; AltName: Full=bZIP transcription factor 36; Short=AtbZIP36 && PF00170:bZIP transcription factor	bZIP_1
TraesCS7D03G0406400	TraesCS7D02G180600	50.4454	79.6565	166.119	19.6914	33.0429	24.3746	98.7401	25.703	1.93935	6.2532e-05	0.00830154	7D	Q9ZPE7.1 RecName: Full=Protein EXORDIUM; Flags: Precursor && PF04674:Phosphate-induced protein 1 conserved region	-
TraesCS7D03G0410800	TraesCS7D02G182700	95.7607	58.482	86.583	6.21832	29.9451	14.2185	80.2752	16.794	2.25814	9.11717e-06	0.00180327	7D	Q8H1E4.1 RecName: Full=Ethylene-responsive transcription factor RAP2-4; AltName: Full=Ethylene-responsive transcription factor ERF059; AltName: Full=Protein RELATED TO APETALA2 4 && PF00847:AP2 domain	AP2
TraesCS7D03G0427600	TraesCS7D02G190600	6.84005	4.03324	3.02034	36.2735	8.26072	66.0147	4.63121	36.8496	-2.97855	0.000158294	0.0170371	7D	Q9ZQ94.1 RecName: Full=UDP-glycosyltransferase 73C5; AltName: Full=Cytokinin-O-glucosyltransferase 3; AltName: Full=Deoxynivalenol-glucosyl-transferase 1; AltName: Full=Zeatin O-glucosyltransferase 3; Short=AtZOG3 && PF00201:UDP-glucoronosyl and UDP-glucosyl transferase	UDPGT
TraesCS7D03G0427900	TraesCS7D02G190900	69.2555	57.4736	81.5491	511.975	217.876	546.398	69.4261	425.417	-2.61539	4.37099e-13	7.64778e-10	7D	PF08263:Leucine rich repeat N-terminal domain	LRRNT_2
TraesCS7D03G0442600	TraesCS7D02G198300	30.7802	23.1911	38.2576	3.10916	1.03259	11.1717	30.743	5.10449	2.586	0.000324476	0.0300017	7D	C3W7B0.1 RecName: Full=UDP-glucose:2-hydroxyflavanone C-glucosyltransferase; Short=OsCGT && PF00201:UDP-glucoronosyl and UDP-glucosyl transferase	UDPGT
TraesCS7D03G0480400	TraesCS7D02G215700	5.13004	2.01662	1.00678	346.153	38.2058	424.525	2.71781	269.628	-6.61148	1.10866e-08	6.25222e-06	7D	P14897.1 RecName: Full=Low molecular mass early light-inducible protein HV90, chloroplastic; Short=ELIP; Flags: Precursor && PF00504:Chlorophyll A-B binding protein	-
TraesCS7D03G0535200	TraesCS7D02G239400	353.973	321.651	360.427	126.439	147.66	147.263	345.35	140.454	1.29802	3.72514e-10	3.06591e-07	7D	Q7F8T6.1 RecName: Full=Tricin synthase 2; AltName: Full=Caffeoyl-CoA 3-O-methyltransferase ROMT17 && PF01596:O-methyltransferase	-
TraesCS7D03G0548000	TraesCS7D02G244800	0.855006	8.06648	9.06101	47.6738	20.6518	59.921	5.99416	42.7489	-2.86051	4.41814e-05	0.00629396	7D	Q84YK8.1 RecName: Full=Probable lipoxygenase 8, chloroplastic; Flags: Precursor && PF00305:Lipoxygenase	Lipoxygenase
TraesCS7D03G0591000	TraesCS7D02G261900	114.571	100.831	71.4813	10.3639	5.16295	4.06244	95.6277	6.52975	3.8764	3.42906e-15	1.11423e-11	7D	Q9XJ61.1 RecName: Full=MADS-box transcription factor 51; Short=OsMADS51; AltName: Full=OsMADS65 && PF00319:SRF-type transcription factor (DNA-binding and dimerisation domain)	SRF-TF
TraesCS7D03G0820000	TraesCS7D02G347300	358.248	408.365	623.196	1097.53	844.659	1015.61	463.27	985.934	-1.09038	2.23621e-05	0.00374919	7D	A5H8G4.1 RecName: Full=Peroxidase 1; AltName: Full=Plasma membrane-bound peroxidase 1; Short=pmPOX1; Flags: Precursor && PF00141:Peroxidase	-
TraesCS7D03G0823600	TraesCS7D02G349300	5.13004	2.01662	19.1288	222.823	46.4665	75.1552	8.75849	114.815	-3.72068	1.80677e-07	7.08554e-05	7D	O24646.1 RecName: Full=Transcription factor HY5; AltName: Full=Protein LONG HYPOCOTYL 5; AltName: Full=bZIP transcription factor 56; Short=AtbZIP56 && PF00170:bZIP transcription factor	bZIP_1
TraesCS7D03G0829500	TraesCS7D02G351300	0	1.00831	10.0678	37.3099	16.5214	64.9991	3.69203	39.6101	-3.45205	0.000168789	0.0179682	7D	Q9SLP4.1 RecName: Full=Chitinase 1; AltName: Full=Tulip bulb chitinase-1; Short=TBC-1; Flags: Precursor && PF00704:Glycosyl hydrolases family 18	-
TraesCS7D03G0844900	TraesCS7D02G357200	2.56502	13.108	8.05423	114.003	20.6518	149.295	7.90909	94.6497	-3.59679	3.61801e-07	0.000126606	7D	PF07343:Protein of unknown function (DUF1475)	-
TraesCS7D03G0849400	TraesCS7D02G360100	169.291	163.346	203.369	388.645	523.523	880.534	178.669	597.567	-1.74221	3.08124e-08	1.58086e-05	7D	Q9SJL9.1 RecName: Full=Probable xyloglucan endotransglucosylase/hydrolase protein 32; Short=At-XTH32; Short=XTH-32; Flags: Precursor && PF00722:Glycosyl hydrolases family 16|PF06955:Xyloglucan endo-transglycosylase (XET) C-terminus	-
TraesCS7D03G0860400	TraesCS7D02G364900	456.573	298.46	347.339	1083.02	419.231	1369.04	367.457	957.1	-1.38067	0.000295038	0.0278458	7D	Q5Z8T3.1 RecName: Full=Probable inositol oxygenase; AltName: Full=Myo-inositol oxygenase; Short=MI oxygenase && PF05153:Myo-inositol oxygenase	-
TraesCS7D03G0865900	TraesCS7D02G367500	1.71001	1.00831	12.0813	58.0377	9.29331	52.8117	4.93322	40.0476	-3.0364	0.000597803	0.0476033	7D	Q9LYD3.1 RecName: Full=Dehydration-responsive element-binding protein 3; AltName: Full=Protein TINY 2 && PF00847:AP2 domain	AP2
TraesCS7D03G0884200	TraesCS7D02G375700	1.71001	2.01662	5.03389	26.9461	12.3911	45.7025	2.92018	28.3465	-3.29736	3.69263e-05	0.00545615	7D	O64411.1 RecName: Full=Polyamine oxidase; Flags: Precursor && PF01593:Flavin containing amine oxidoreductase	Amino_oxidase
TraesCS7D03G0991000	TraesCS7D02G419000	132.526	209.728	271.83	89.1293	96.0309	89.3737	204.695	91.5113	1.15959	0.000205042	0.0208206	7D	Q38910.1 RecName: Full=Probable xyloglucan endotransglucosylase/hydrolase protein 23; Short=At-XTH23; Short=XTH-23; Flags: Precursor && PF06955:Xyloglucan endo-transglycosylase (XET) C-terminus	-
TraesCS7D03G1056600	TraesCS7D02G444100	47.8804	44.3656	41.2779	110.893	81.5746	116.795	44.508	103.088	-1.21017	8.02112e-05	0.0101736	7D	Q9SW97.2 RecName: Full=Glutamate receptor 3.5; AltName: Full=Ionotropic glutamate receptor GLR6; AltName: Full=Ligand-gated ion channel 3.5; Flags: Precursor && PF00497:Bacterial extracellular solute-binding proteins, family 3|PF01094:Receptor family ligand binding region|PF00060:Ligand-gated ion channel	ANF_receptor
TraesCS7D03G1113000	TraesCS7D02G469000	16.2451	29.241	41.2779	2.07277	1.03259	1.01561	28.9213	1.37366	4.39406	2.20418e-06	0.000569722	7D	F4JH46.1 RecName: Full=Protein DETOXIFICATION 34; Short=AtDTX34; AltName: Full=Multidrug and toxic compound extrusion protein 34; Short=MATE protein 34 && PF01554:MatE	MatE
TraesCS7D03G1123900	TraesCS7D02G475100	97.4707	141.163	169.139	336.826	237.496	246.793	135.924	273.705	-1.01228	0.000390115	0.0342604	7D	Q9FUD3.1 RecName: Full=Basic leucine zipper 9; Short=AtbZIP9; Short=bZIP protein 9; AltName: Full=Basic leucine zipper OPAQUE 2 homolog 2; Short=Basic leucine zipper O2 homolog 2 && PF00170:bZIP transcription factor	bZIP_1
TraesCS7D03G1177500	TraesCS7D02G498100	184.681	345.85	598.027	1377.36	471.894	1800.68	376.186	1216.64	-1.69401	0.000362011	0.0323755	7D	Q6Z351.1 RecName: Full=Putative aldehyde oxidase-like protein && PF03450:CO dehydrogenase flavoprotein C-terminal domain|PF00941:FAD binding domain in molybdopterin dehydrogenase|PF02738:Molybdopterin-binding domain of aldehyde dehydrogenase|PF01799:[2Fe-2S] binding domain|PF01315:Aldehyde oxidase and xanthine dehydrogenase, a/b hammerhead domain	-
TraesCS7D03G1194600	TraesCS7D02G504600	89.7757	78.6481	91.6169	290.188	166.247	396.088	86.6802	284.174	-1.71278	3.15627e-07	0.000112762	7D	Q9AR73.1 RecName: Full=Hydroquinone glucosyltransferase; AltName: Full=Arbutin synthase && PF00201:UDP-glucoronosyl and UDP-glucosyl transferase	UDPGT
TraesCS7D03G1233400	TraesCS7D02G522100	489.919	322.659	491.308	1140.03	751.725	806.395	434.629	899.382	-1.04868	5.50341e-05	0.00752577	7D	D9HP25.1 RecName: Full=Cell number regulator 9; AltName: Full=ZmCNR09 && PF04749:PLAC8 family	-
TraesCS7D03G1250900	TraesCS7D02G531300	33.3452	37.3075	30.2034	63.2196	71.2487	113.748	33.6187	82.7389	-1.29997	0.000395412	0.0345477	7D	P93844.2 RecName: Full=Phospholipase D alpha 2; Short=PLD alpha 2; AltName: Full=Choline phosphatase 2; AltName: Full=Phosphatidylcholine-hydrolyzing phospholipase D 2 && PF12357:Phospholipase D C terminal|PF00168:C2 domain|PF00614:Phospholipase D Active site motif	C2
TraesCS7D03G1251100	TraesCS7D02G531500	16.2451	18.1496	34.2305	51.8194	74.3465	67.0303	22.8751	64.3987	-1.50008	0.00034684	0.0314725	7D	Q9SND9.1 RecName: Full=Uncharacterized acetyltransferase At3g50280 && PF02458:Transferase family	-
TraesCS7D03G1292300	TraesCS7D02G549900	0.855006	3.02493	5.03389	17.6186	8.26072	77.1864	2.97128	34.3552	-3.55539	0.000154117	0.0166928	7D	P46526.1 RecName: Full=Cold shock protein CS66 && PF00257:Dehydrin	-
TraesCSU03G0021100	TraesCSU02G024300	119.701	120.997	91.6169	242.515	374.83	207.184	110.772	274.843	-1.31011	9.70137e-06	0.00189844	Un	Q38J50.1 RecName: Full=Tricetin 3',4',5'-O-trimethyltransferase; Short=TaOMT2; AltName: Full=Caffeic acid 3-O-methyltransferase; Short=TaCM; AltName: Full=Flavone O-methyltransferase 2 && PF08100:Dimerisation domain|PF00891:O-methyltransferase	-
TraesCSU03G0022200	TraesCSU02G025000	0	0	1.00678	42.4919	1.03259	48.7493	0.335593	30.7579	-6.49205	2.57317e-05	0.00411206	Un	A6YIH8.1 RecName: Full=Premnaspirodiene oxygenase; Short=HPO; AltName: Full=Cytochrome P450 71D55 && PF00067:Cytochrome P450	p450
TraesCSU03G0111400	TraesCSU02G121800	171.001	177.462	182.227	381.39	275.701	435.697	176.897	364.263	-1.04249	1.64734e-05	0.00295038	Un	F4HUK6.1 RecName: Full=Probable acyl-activating enzyme 1, peroxisomal; AltName: Full=AMP-binding protein 1; Short=AtAMPBP1 && PF13193:AMP-binding enzyme C-terminal domain|PF00501:AMP-binding enzyme	AMP-binding
TraesCSU03G0209800	TraesCSU02G167700	0.855006	0	0	121.257	1.03259	273.199	0.285002	131.83	-8.5915	0.000216174	0.0217547	Un	P07369.1 RecName: Full=Chlorophyll a-b binding protein 3C, chloroplastic; AltName: Full=LHCII type I CAB-3C; Short=LHCP; Flags: Precursor && PF00504:Chlorophyll A-B binding protein	-
TraesCSU03G0214200	TraesCSU02G169600	230.852	249.052	364.454	903.73	434.72	560.617	281.453	633.022	-1.16996	0.000211368	0.0213359	Un	P11955.4 RecName: Full=26 kDa endochitinase 1; Flags: Precursor && PF00182:Chitinase class I|PF00187:Chitin recognition protein	-
TraesCSU03G0464900	TraesCSU02G250200	0.855006	0	5.03389	12.4366	23.7496	21.3278	1.96297	19.1713	-3.31347	0.000430064	0.0370534	Un	PF14861:Plant antimicrobial peptide	-
