# Supplementary material for: Impact of “Green Revolution” gene Rht-B1b on coleoptile length of wheat
Source: Front Plant Sci. 2023 Mar 2;14:1147019. doi: 10.3389/fpls.2023.1147019 (PMC10017974; doi:10.3389/fpls.2023.1147019)
Supplement: Supplementary file 3 [file Table_3.xlsx]

## Sheet: Coleptile tip
Table S3 The differentially expressed genes in coleoptile tip between Rht-B1b overexpression lines (Rht-B1b-OE) and transgenic null lines (TNL)
gene_ID of IWGSC RefSeq 2.1	Gene ID of IWGSC RefSeq 1.1	Rht-B1b-OE replicate 1	Rht-B1b-OE replicate 2	Rht-B1b-OE replicate 3	TNL replicate 1	TNL replicate 2	TNL replicate 3	Rht-B1b-OE mean	TNL mean	log2FoldChange	pvalue	padj	gene_chr	gene_description	tf_family
TraesCS1A03G0000400	TraesCS1A02G000200	141.732	23.2601	22.7467	10.9255	7.06347	11.4552	62.5796	9.81472	2.6689	4.65e-05	0.00152097	Chr1A	Q8TGM7.1 RecName: Full=Putative uncharacterized protein ART2; AltName: Full=Antisense to ribosomal RNA transcript protein 2 && -	-
TraesCS1A03G0000800	TraesCS1A02G000400	301.312	104.117	176.804	73.7469	48.4352	128.651	194.077	83.611	1.21236	0.00122509	0.0185519	Chr1A	Q6CQE5.2 RecName: Full=Protein TAR1 && -	-
TraesCS1A03G0001700	TraesCS1A02G001100	154.33	23.2601	89.953	31.866	13.1179	31.7221	89.1811	25.5687	1.79883	0.000721324	0.0124973	Chr1A	Q6CQE5.2 RecName: Full=Protein TAR1 && -	-
TraesCS1A03G0045700	TraesCS1A02G020000	20630.9	17596.8	22832.6	10939.1	9464.04	8461.88	20353.4	9621.68	1.08093	1.1e-14	7.05e-12	Chr1A	-	-
TraesCS1A03G0061600	TraesCS1A02G026800	76.6402	93.0403	64.1045	208.494	159.433	104.859	77.9283	157.595	-1.01672	0.000645662	0.0114879	Chr1A	P01053.2 RecName: Full=Subtilisin-chymotrypsin inhibitor-2A; Short=CI-2A && -	-
TraesCS1A03G0073400	TraesCS1A02G032800	0	0	0	15.4777	9.08161	7.93053	0	10.83	-5.79149	0.000174322	0.00426837	Chr1A	P54768.1 RecName: Full=Tyrosine/DOPA decarboxylase 1; Includes: RecName: Full=DOPA decarboxylase; Short=DDC; Includes: RecName: Full=Tyrosine decarboxylase [Papaver somniferum] && PF00282:Pyridoxal-dependent decarbo	-
TraesCS1A03G0073500	TraesCS1A02G032900	5.24933	6.64573	5.16971	30.045	24.2176	25.5539	5.68826	26.6055	-2.22878	0.00054326	0.0101352	Chr1A	Q9LUH2.1 RecName: Full=Protein DETOXIFICATION 19; Short=AtDTX19; AltName: Full=Multidrug and toxic compound extrusion protein 19; Short=MATE protein 19; AltName: Full=Protein ABERRANT LATERAL ROOT FORMATION 5 && PF0	MatE
TraesCS1A03G0076000	TraesCS1A02G033500	35.6955	26.5829	23.7807	70.1051	86.7798	74.0183	28.6864	76.9677	-1.4226	7.11e-05	0.00211254	Chr1A	Q41050.1 RecName: Full=Outer envelope pore protein 16, chloroplastic; AltName: Full=Chloroplastic outer envelope pore protein of 16 kDa [Pisum sativum] && PF02466:Tim17/Tim22/Tim23/Pmp24 family	-
TraesCS1A03G0089100	TraesCS1A02G037400	32.5459	14.3991	13.4413	77.3887	58.5259	28.1974	20.1287	54.704	-1.43997	0.00434143	0.0456154	Chr1A	Q9M353.1 RecName: Full=Cation/H(+) antiporter 20; AltName: Full=Protein CATION/H+ EXCHANGER 20; Short=AtCHX20 && PF00999:Sodium/hydrogen exchanger family	Na_H_Exchanger
TraesCS1A03G0101600	TraesCS1A02G042700	32.5459	21.0448	15.5091	61.0005	78.7072	56.3949	23.0333	65.3676	-1.50322	0.000245691	0.00556275	Chr1A	Q4JL76.1 RecName: Full=Myb-related protein MYBAS2 && PF00249:Myb-like DNA-binding domain	Myb_DNA-binding
TraesCS1A03G0116400	TraesCS1A02G048300	38.8451	37.6592	79.6136	123.822	106.961	126.888	52.0393	119.224	-1.19403	0.000304653	0.0065349	Chr1A	Q7Z2Z2.2 RecName: Full=Elongation factor-like GTPase 1; AltName: Full=Elongation factor Tu GTP-binding domain-containing protein 1; AltName: Full=Elongation factor-like 1; AltName: Full=Protein FAM42A && PF00679:Elo	GTP_EFTU
TraesCS1A03G0146700	TraesCS1A02G060500	7.34906	33.2287	31.0183	75.5678	103.934	100.453	23.8653	93.3184	-1.9692	4.99e-06	0.000256401	Chr1A	PF12854:PPR repeat|PF13041:PPR repeat family	-
TraesCS1A03G0172500	TraesCS1A02G070400	9.4488	7.75336	3.10183	23.6718	17.1541	124.245	6.76799	55.0237	-3.02896	2.75e-05	0.00101103	Chr1A	Q6IEQ7.1 RecName: Full=WRKY transcription factor WRKY24; Short=OsWRKY24 && PF03106:WRKY DNA -binding domain	WRKY
TraesCS1A03G0205200	TraesCS1A02G084300	30.4461	13.2915	11.3734	37.3287	63.5712	48.4644	18.3703	49.7881	-1.43532	0.00323869	0.037177	Chr1A	PF02536:mTERF	-
TraesCS1A03G0380800	TraesCS1A02G142000	242.519	207.125	185.076	534.438	730.565	531.346	211.573	598.783	-1.50013	5.17e-15	3.49e-12	Chr1A	Q7XDY9.1 RecName: Full=Rubisco accumulation factor 1, chloroplastic; Flags: Precursor && PF18087:Rubisco Assembly chaperone C-terminal domain|PF18578:Rubisco accumulation factor 1 alpha helical domain|PF18579:Rubisc	-
TraesCS1A03G0390500	TraesCS1A02G144700	4.19947	3.32287	1.03394	9.10456	22.1995	18.5046	2.85209	16.6029	-2.54384	0.00438066	0.0458549	Chr1A	-	-
TraesCS1A03G0390800	TraesCS1A02G144800	102.887	145.099	150.956	232.166	407.663	335.726	132.98	325.185	-1.28942	1.53e-07	1.43e-05	Chr1A	PF02037:SAP domain	SAP
TraesCS1A03G0411300	TraesCS1A02G153100	760.103	685.618	707.217	1688.9	2010.06	1128.78	717.646	1609.25	-1.16458	4.59e-10	9.29e-08	Chr1A	B5WWZ9.1 RecName: Full=Long-chain-alcohol oxidase FAO2; AltName: Full=Long-chain fatty alcohol oxidase 2 && PF05199:GMC oxidoreductase|PF00732:GMC oxidoreductase	-
TraesCS1A03G0454100	TraesCS1A02G168100	173.228	158.39	406.34	73.7469	98.8886	140.106	245.986	104.247	1.23849	0.000254457	0.00570197	Chr1A	Q67Y83.2 RecName: Full=Serine carboxypeptidase-like 51; Flags: Precursor && PF00450:Serine carboxypeptidase	Peptidase_S10
TraesCS1A03G0461300	TraesCS1A02G171000	643.568	509.506	536.616	1534.12	2037.31	1503.28	563.23	1691.57	-1.586	2.05e-22	3.4e-19	Chr1A	Q42850.1 RecName: Full=Protochlorophyllide reductase B, chloroplastic; Short=PCR B; AltName: Full=NADPH-protochlorophyllide oxidoreductase B; Short=POR B; Flags: Precursor && PF00106:short chain dehydrogenase	adh_short
TraesCS1A03G0487400	TraesCS1A02G180800	37.7952	32.1211	20.6789	78.2992	73.6619	67.8501	30.1984	73.2704	-1.27984	0.00046863	0.00902262	Chr1A	Q56Y42.1 RecName: Full=Pyridoxal reductase, chloroplastic; Flags: Precursor && PF00248:Aldo/keto reductase family	Aldo_ket_red
TraesCS1A03G0503100	TraesCS1A02G187100	3.1496	4.43049	12.4073	47.3437	30.272	13.2176	6.66247	30.2778	-2.17766	0.0020985	0.0271702	Chr1A	Q50EK3.1 RecName: Full=Cytochrome P450 704C1; AltName: Full=Cytochrome P450 CYPD [Pinus taeda] && PF00067:Cytochrome P450	p450
TraesCS1A03G0504200	TraesCS1A02G187800	18.8976	9.9686	28.9504	88.3142	44.399	44.0585	19.2722	58.9239	-1.60853	0.000876245	0.0144422	Chr1A	-	-
TraesCS1A03G0525200	TraesCS1A02G195500	163.779	140.668	111.666	275.868	356.201	237.916	138.704	289.995	-1.06307	3.81e-06	0.000206087	Chr1A	O82290.2 RecName: Full=Probable inactive shikimate kinase like 2, chloroplastic; Short=AtSKL2; Flags: Precursor && PF01202:Shikimate kinase	SKI
TraesCS1A03G0528100	TraesCS1A02G196500	5.24933	2.21524	0	42.7914	30.272	7.04936	2.48819	26.7043	-3.42479	0.000220525	0.00512269	Chr1A	Q9FVQ4.1 RecName: Full=Plastidal glycolate/glycerate translocator 1, chloroplastic; AltName: Full=Bacterial membrane protein LrgB-like protein; Short=AtLrgB; Flags: Precursor && PF04172:LrgB-like family	-
TraesCS1A03G0529500	TraesCS1A02G197700	44.0944	35.4439	62.0366	102.881	102.925	87.2358	47.1916	97.6807	-1.04646	0.00103211	0.016369	Chr1A	Q9FNL8.1 RecName: Full=Protein NRT1/ PTR FAMILY 5.3; Short=AtNPF5.3; AltName: Full=Peptide transporter PTR3-B && PF00854:POT family	-
TraesCS1A03G0529900	TraesCS1A02G197900	88.1888	53.1659	43.4256	191.196	352.164	269.638	61.5934	270.999	-2.13618	8.21e-13	3.27e-10	Chr1A	PF05899:Protein of unknown function (DUF861)	Cupin_3
TraesCS1A03G0573000	TraesCS1A02G217600	11.5485	25.4753	11.3734	71.926	80.7254	68.7313	16.1324	73.7942	-2.20007	2.3e-07	1.99e-05	Chr1A	-	-
TraesCS1A03G0619000	TraesCS1A02G237800	43.0445	63.1345	74.4439	161.151	182.641	104.859	60.2076	149.55	-1.31093	2.02e-05	0.000783989	Chr1A	-	-
TraesCS1A03G0638100	TraesCS1A02G246800	71.3909	83.0717	44.4595	129.285	150.351	153.324	66.3074	144.32	-1.12415	8.22e-05	0.00237684	Chr1A	Q39089.1 RecName: Full=Protein PALE CRESS, chloroplastic; Flags: Precursor && -	-
TraesCS1A03G0646500	TraesCS1A02G250100	0	6.64573	0	23.6718	37.3355	15.8611	2.21524	25.6228	-3.56295	0.00015952	0.00400725	Chr1A	Q9ZT66.1 RecName: Full=Endo-1,3;1,4-beta-D-glucanase; Flags: Precursor && PF01738:Dienelactone hydrolase family	-
TraesCS1A03G0648400	TraesCS1A02G251200	46.1941	57.5964	65.1384	152.957	204.841	90.7605	56.3096	149.519	-1.40655	1.57e-05	0.000645454	Chr1A	Q6ATY4.1 RecName: Full=UPF0603 protein Os05g0401100, chloroplastic; Flags: Precursor >A2Y4G9.2 RecName: Full=UPF0603 protein OsI_019212, chloroplastic; Flags: Precursor && PF04536:TPM domain	-
TraesCS1A03G0655800	TraesCS1A02G255100	135.433	120.731	109.598	302.271	360.237	425.605	121.921	362.704	-1.57324	5.88e-14	3.2e-11	Chr1A	Q6L545.1 RecName: Full=Gibberellin receptor GID1; AltName: Full=Gibberellin-insensitive dwarf protein 1; AltName: Full=Protein GIBBERELLIN INSENSITIVE DWARF1 && PF07859:alpha/beta hydrolase fold	Abhydrolase_3
TraesCS1A03G0668700	TraesCS1A02G261800	9.4488	5.53811	5.16971	31.866	46.4171	22.0293	6.71887	33.4374	-2.31056	0.000186948	0.00450789	Chr1A	Q9ZVP8.2 RecName: Full=NAC domain-containing protein 35; Short=ANAC035; AltName: Full=Protein LONG VEGETATIVE PHASE 1; Short=AtLOV1 && PF02365:No apical meristem (NAM) protein	NAM
TraesCS1A03G0669200	TraesCS1A02G262100	2.09973	3.32287	7.2376	40.0601	45.408	30.841	4.22007	38.7697	-3.19172	9.83e-07	6.67e-05	Chr1A	Q01398.1 RecName: Full=Haloacetate dehalogenase H-1 && PF12697:Alpha/beta hydrolase family	-
TraesCS1A03G0676500	TraesCS1A02G265900	3.1496	8.86098	2.06789	26.4032	18.1632	27.3163	4.69282	23.9609	-2.36688	0.00126167	0.0189699	Chr1A	-	-
TraesCS1A03G0676900	TraesCS1A02G266100	3.1496	2.21524	3.10183	37.3287	29.263	52.8702	2.82222	39.8206	-3.81655	8.96e-08	9.08e-06	Chr1A	Q6F357.1 RecName: Full=Phospholipase A1-II 7 >A2Y7R2.1 RecName: Full=Phospholipase A1-II 7 && PF01764:Lipase (class 3)	Lipase_3
TraesCS1A03G0681800	TraesCS1A02G268600	1.04987	0	3.10183	9.10456	26.2357	6.16819	1.3839	13.8362	-3.29578	0.00443065	0.046196	Chr1A	Q7DFU6.3 PUTATIVE PSEUDOGENE: RecName: Full=Putative uncharacterized protein YghX && PF01738:Dienelactone hydrolase family	-
TraesCS1A03G0682100	TraesCS1A02G268800	35.6955	12.1838	23.7807	86.4933	63.5712	41.415	23.8867	63.8265	-1.41399	0.00193731	0.0256902	Chr1A	P81393.1 RecName: Full=Myb-related protein 308 && PF00249:Myb-like DNA-binding domain	Myb_DNA-binding
TraesCS1A03G0685700	TraesCS1A02G270900	0	0	0	13.6568	3.0272	29.9598	0	15.5479	-6.31729	3.62e-05	0.0012489	Chr1A	PF06749:Protein of unknown function (DUF1218)	-
TraesCS1A03G0687500	TraesCS1A02G272000	2.09973	5.53811	8.27154	27.3137	25.2267	20.2669	5.30313	24.2691	-2.19219	0.00168409	0.0233758	Chr1A	O65351.1 RecName: Full=Subtilisin-like protease SBT1.7; AltName: Full=Cucumisin-like serine protease; AltName: Full=Subtilase subfamily 1 member 7; Short=AtSBT1.7; AltName: Full=Subtilisin-like serine protease 1; Sh	Peptidase_S8
TraesCS1A03G0687800	TraesCS1A02G272300	0	0	0	9.10456	3.0272	29.0786	0	13.7368	-6.13879	8.91e-05	0.00254509	Chr1A	Q70II3.2 RecName: Full=Ethylene-responsive transcription factor ERF110 && PF00847:AP2 domain	AP2
TraesCS1A03G0703100	TraesCS1A02G278600	217.322	215.986	291.572	409.705	471.234	663.521	241.627	514.82	-1.09124	3.23e-07	2.67e-05	Chr1A	-	-
TraesCS1A03G0703200	TraesCS1A02G278700	51.4435	37.6592	51.6971	86.4933	121.088	107.503	46.9333	105.028	-1.15928	0.000171569	0.00422619	Chr1A	O80437.1 RecName: Full=Glycerol-3-phosphate 2-O-acyltransferase 6; Short=AtGPAT6; AltName: Full=Glycerol-3-phosphate acyltransferase 6 && PF12710:haloacid dehalogenase-like hydrolase	-
TraesCS1A03G0708400	TraesCS1A02G280500	40.9448	59.8116	33.0862	69.1946	89.807	135.7	44.6142	98.2339	-1.14239	0.00148384	0.0213132	Chr1A	-	-
TraesCS1A03G0708900	TraesCS1A02G280900	22.0472	32.1211	15.5091	65.5528	83.7526	126.888	23.2258	92.0646	-1.99221	6.95e-07	5.03e-05	Chr1A	Q9LZN0.1 RecName: Full=Rop guanine nucleotide exchange factor 7; Short=AtRopGEF7; AltName: Full=Rho of plants guanine nucleotide exchange factor 7 && PF03759:PRONE (Plant-specific Rop nucleotide exchanger)	DUF315
TraesCS1A03G0716900	TraesCS1A02G283900	76.6402	68.6726	19.6449	181.181	151.36	78.4241	54.9859	136.988	-1.31789	0.00151333	0.0216211	Chr1A	P0DKK6.1 RecName: Full=Laccase-13; AltName: Full=Benzenediol:oxygen oxidoreductase 13; AltName: Full=Diphenol oxidase 13; AltName: Full=Urishiol oxidase 13; Flags: Precursor >B9FJH4.2 RecName: Full=Laccase-12; AltNa	-
TraesCS1A03G0728800	TraesCS1A02G290800	24.1469	16.6143	10.3394	72.8365	61.5531	36.128	17.0336	56.8392	-1.7381	0.000232475	0.00533101	Chr1A	Q56YJ8.1 RecName: Full=Transcription factor FAMA; AltName: Full=Basic helix-loop-helix protein 97; Short=AtbHLH97; Short=bHLH 97; AltName: Full=Transcription factor EN 14; AltName: Full=bHLH transcription factor bHL	HLH
TraesCS1A03G0744600	TraesCS1A02G298800	76.6402	44.3049	58.9347	198.479	179.614	167.422	59.96	181.839	-1.59849	2.38e-09	3.92e-07	Chr1A	-	-
TraesCS1A03G0749900	TraesCS1A02G301400	45.1443	16.6143	32.0522	121.091	123.106	82.83	31.2703	109.009	-1.79685	1.31e-06	8.48e-05	Chr1A	Q9LZV4.1 RecName: Full=Serine/threonine-protein kinase STN8, chloroplastic; AltName: Full=Protein STATE TRANSITION 8; Flags: Precursor && PF00069:Protein kinase domain	Pkinase
TraesCS1A03G0772000	TraesCS1A02G311100	13.6483	14.3991	13.4413	50.9855	42.3808	24.6728	13.8295	39.3464	-1.50751	0.0029995	0.0351684	Chr1A	Q949Z1.1 RecName: Full=Polygalacturonase At1g48100; Short=PG; AltName: Full=Pectinase At1g48100; Flags: Precursor && PF00295:Glycosyl hydrolases family 28	-
TraesCS1A03G0789400	TraesCS1A02G317900	17.8477	18.8296	21.7128	70.1051	34.3083	44.9397	19.4634	49.7844	-1.35641	0.00279066	0.0333459	Chr1A	P37834.2 RecName: Full=Peroxidase 1; Flags: Precursor && PF00141:Peroxidase	-
TraesCS1A03G0790600	TraesCS1A02G318900	48.2939	64.2421	155.091	7.28365	21.1904	29.0786	89.2091	19.1842	2.21753	1.31e-05	0.000556023	Chr1A	P37834.2 RecName: Full=Peroxidase 1; Flags: Precursor && PF00141:Peroxidase	-
TraesCS1A03G0791600	TraesCS1A02G319400	27.2965	9.9686	43.4256	75.5678	92.8342	52.8702	26.8969	73.7574	-1.44872	0.0014819	0.0212942	Chr1A	PF09353:Domain of unknown function (DUF1995)	-
TraesCS1A03G0809100	TraesCS1A02G325800	7.34906	5.53811	7.2376	27.3137	22.1995	24.6728	6.70826	24.7286	-1.88072	0.00297402	0.0349795	Chr1A	PF06414:Zeta toxin	-
TraesCS1A03G0824100	TraesCS1A02G332300	0	0	0	7.28365	3.0272	8.8117	0	6.37418	-5.02992	0.00425475	0.0450304	Chr1A	-	-
TraesCS1A03G0827500	TraesCS1A02G334100	48.2939	33.2287	20.6789	128.374	63.5712	62.5631	34.0671	84.8362	-1.31766	0.00145104	0.0209891	Chr1A	P68350.1 RecName: Full=Dof zinc finger protein DOF1.5; Short=AtDOF1.5 && PF02701:Dof domain, zinc finger	zf-Dof
TraesCS1A03G0843800	TraesCS1A02G341800	489.238	280.228	288.47	809.395	714.42	641.492	352.645	721.769	-1.0329	9.71e-07	6.61e-05	Chr1A	Q8VYZ3.1 RecName: Full=Probable pectinesterase 53; Short=PE 53; AltName: Full=Pectin methylesterase 53; Short=AtPME53; Flags: Precursor && PF01095:Pectinesterase	-
TraesCS1A03G0851600	TraesCS1A02G346600	184.776	116.3	120.971	366.003	558.014	419.437	140.683	447.818	-1.66905	5.38e-13	2.23e-10	Chr1A	-	-
TraesCS1A03G0862600	TraesCS1A02G351600	22.0472	21.0448	4.13577	47.3437	42.3808	101.335	15.7426	63.6864	-2.0224	0.000184503	0.00446529	Chr1A	Q9FMV7.1 RecName: Full=Cytochrome P450 94B1 && PF00067:Cytochrome P450	p450
TraesCS1A03G0874000	TraesCS1A02G357400	35.6955	17.722	28.9504	81.0306	87.7889	99.5722	27.4559	89.4639	-1.70111	2.35e-06	0.000137077	Chr1A	Q4ULF1.1 RecName: Full=30S ribosomal protein S1 && PF00575:S1 RNA binding domain	S1
TraesCS1A03G0955000	TraesCS1A02G392000	1.04987	2.21524	5.16971	64.6424	104.943	26.4351	2.81161	65.3402	-4.52783	4.31e-10	8.86e-08	Chr1A	P20143.1 RecName: Full=Photosystem I reaction center subunit VI, chloroplastic; Short=PSI-H; AltName: Full=Light-harvesting complex I 11 kDa protein; Flags: Precursor && PF03244:Photosystem I reaction centre subunit	-
TraesCS1A03G0977000	TraesCS1A02G400500	393.7	357.762	366.016	808.485	1035.3	741.945	372.493	861.911	-1.20951	4.2e-13	1.85e-10	Chr1A	Q1XDB4.1 RecName: Full=Uncharacterized protein ycf23 (chloroplast) [Pyropia yezoensis] && PF04481:Protein of unknown function (DUF561)	-
TraesCS1A03G0987800	TraesCS1A02G403500	67.1914	107.439	98.2246	41.881	41.3718	44.9397	90.9518	42.7308	1.0885	0.000789154	0.0133864	Chr1A	F4I171.1 RecName: Full=Mediator of RNA polymerase II transcription subunit 15a && PF16987:KIX domain	-
TraesCS1A03G0994600	TraesCS1A02G406500	57.7426	38.7668	34.1201	261.301	299.693	145.393	43.5432	235.462	-2.43334	1.27e-14	8e-12	Chr1A	O22386.2 RecName: Full=50S ribosomal protein L12, chloroplastic; AltName: Full=CL12; Flags: Precursor && PF00542:Ribosomal protein L7/L12 C-terminal domain|PF16320:Ribosomal protein L7/L12 dimerisation domain	-
TraesCS1A03G1002400	TraesCS1A02G409700	165.879	129.592	126.141	269.495	330.974	316.34	140.537	305.603	-1.12002	5.52e-08	6.09e-06	Chr1A	PF11341:Protein of unknown function (DUF3143)	-
TraesCS1A03G1010500	TraesCS1A02G413700	32.5459	7.75336	11.3734	102.881	131.179	46.702	17.2242	93.5874	-2.43661	1.26e-06	8.21e-05	Chr1A	Q7XJJ7.1 RecName: Full=Fatty acid amide hydrolase; AltName: Full=N-acylethanolamine amidohydrolase && PF01425:Amidase	Amidase
TraesCS1A03G1017500	TraesCS1A02G416700	67.1914	27.6906	45.4935	315.018	334.001	170.947	46.7918	273.322	-2.54262	3.62e-15	2.48e-12	Chr1A	-	-
TraesCS1A03G1018700	TraesCS1A02G417300	81.8896	124.054	76.5118	42.7914	29.263	10.574	94.1517	27.5428	1.77538	3.59e-05	0.00124408	Chr1A	Q9FXT6.2 RecName: Full=Peroxisomal membrane protein PEX14; AltName: Full=Peroxin-14; Short=AtPEX14; AltName: Full=Peroxisome biogenesis protein 14; AltName: Full=Pex14p; AltName: Full=Protein PEROXISOME DEFECTIVE 2	-
TraesCS1A03G1027700	TraesCS1A02G421200	69.2912	31.0134	51.6971	164.792	130.17	163.898	50.6672	152.953	-1.59201	2.25e-07	1.95e-05	Chr1A	Q9M9Q6.1 RecName: Full=Serine carboxypeptidase-like 50; Flags: Precursor && PF00450:Serine carboxypeptidase	Peptidase_S10
TraesCS1A03G1028300	TraesCS1A02G421600	48.2939	45.4125	43.4256	130.195	101.916	51.989	45.7107	94.7	-1.0497	0.00413477	0.044173	Chr1A	Q9M9Q6.1 RecName: Full=Serine carboxypeptidase-like 50; Flags: Precursor && PF00450:Serine carboxypeptidase	Peptidase_S10
TraesCS1A03G1031500	TraesCS1A02G423700	2.09973	3.32287	4.13577	24.5823	16.1451	14.0987	3.18612	18.2754	-2.5198	0.00220928	0.0281823	Chr1A	PF03168:Late embryogenesis abundant protein	-
TraesCS1A03G1039100	TraesCS1A02G426900	43.0445	43.1973	29.9843	110.165	146.315	106.622	38.742	121.034	-1.64345	1.43e-07	1.35e-05	Chr1A	Q9SV26.2 RecName: Full=Pentatricopeptide repeat-containing protein At4g01030, mitochondrial; Flags: Precursor && PF13041:PPR repeat family|PF14432:DYW family of nucleic acid deaminases	-
TraesCS1A03G1039500	TraesCS1A02G427200	93.4381	110.762	87.8851	169.345	313.82	295.192	97.3618	259.452	-1.41425	7.44e-08	7.79e-06	Chr1A	Q84JF5.1 RecName: Full=Protein PLASTID TRANSCRIPTIONALLY ACTIVE 14; Short=pTAC14; AltName: Full=Plastid-encoded RNA polymerase-associated protein 7; Short=PEP-associated protein 7; Flags: Precursor && PF00856:SET do	SET
TraesCS1A03G1050000	TraesCS1A02G431600	43.0445	29.9058	25.8486	97.4188	74.671	59.9196	32.933	77.3364	-1.23114	0.000878063	0.0144687	Chr1A	O24621.1 RecName: Full=RNA polymerase sigma factor sigC; Short=Sigma factor C; Short=Sigma-C; AltName: Full=RNA polymerase sigma factor sig3; Short=Atsig3; Short=Sigma factor 3; Flags: Precursor && PF04545:Sigma-70,	Sigma70_r3
TraesCS1A03G1082000	TraesCS1A02G444200	55.6429	60.9192	63.0705	137.479	129.161	160.373	59.8776	142.337	-1.25022	2.19e-06	0.000129793	Chr1A	PF06203:CCT motif	CCT
TraesCS1A03G1082500	TraesCS1A02G444500	31.496	57.5964	45.4935	109.255	98.8886	70.4936	44.8619	92.879	-1.05085	0.00206301	0.0268453	Chr1A	O49545.1 RecName: Full=Leucine-rich repeat receptor-like serine/threonine-protein kinase BAM1; AltName: Full=Protein BARELY ANY MERISTEM 1; Flags: Precursor && PF12799:Leucine Rich repeats (2 copies)|PF08263:Leucine	Pkinase
TraesCS1B03G0022400	TraesCS1B02G011500	51.4435	25.4753	31.0183	117.449	82.7435	70.4936	35.979	90.2286	-1.32474	0.000347162	0.00716889	Chr1B	-	-
TraesCS1B03G0031200	TraesCS1B02G015100	169.028	136.238	257.452	70.1051	98.8886	75.7806	187.573	81.5914	1.20417	2.25e-05	0.000857249	Chr1B	-	-
TraesCS1B03G0037500	TraesCS1B02G018200	15.748	12.1838	37.2219	90.1351	211.904	66.0878	21.7179	122.709	-2.4915	1.51e-07	1.41e-05	Chr1B	P22220.1 RecName: Full=Arginine decarboxylase; Short=ADC; Short=ARGDC && PF02784:Pyridoxal-dependent decarboxylase, pyridoxal binding domain	-
TraesCS1B03G0045800	TraesCS1B02G023000	57.7426	57.5964	81.6815	6.37319	19.1723	21.1481	65.6735	15.5645	2.07971	6.51e-06	0.000317022	Chr1B	Q39214.1 RecName: Full=Disease resistance protein RPM1; AltName: Full=Resistance to Pseudomonas syringae protein 3 && PF00931:NB-ARC domain|PF18052:Rx N-terminal domain	NB-ARC
TraesCS1B03G0066500	TraesCS1B02G033200	308.661	115.193	173.702	555.378	486.37	356.874	199.185	466.207	-1.22574	1.38e-05	0.00058163	Chr1B	O65493.1 RecName: Full=Cysteine protease XCP1; AltName: Full=Xylem cysteine peptidase 1; Short=AtXCP1; Flags: Precursor && PF08246:Cathepsin propeptide inhibitor domain (I29)|PF00112:Papain family cysteine protease	Peptidase_C1
TraesCS1B03G0068000	TraesCS1B02G034000	195.275	130.699	120.971	569.945	524.715	353.349	148.982	482.67	-1.69515	5.81e-13	2.37e-10	Chr1B	P01053.2 RecName: Full=Subtilisin-chymotrypsin inhibitor-2A; Short=CI-2A && -	-
TraesCS1B03G0095300	TraesCS1B02G050400	27.2965	35.4439	25.8486	92.8665	56.5078	61.6819	29.5297	70.3521	-1.25548	0.000948251	0.0153319	Chr1B	P93844.2 RecName: Full=Phospholipase D alpha 2; Short=PLD alpha 2; AltName: Full=Choline phosphatase 2; AltName: Full=Phosphatidylcholine-hydrolyzing phospholipase D 2 && PF12357:Phospholipase D C terminal|PF00614:P	C2
TraesCS1B03G0100400	TraesCS1B02G046000	82.9394	108.547	119.937	22.7614	38.3446	42.2962	103.808	34.4674	1.59122	3.14e-06	0.000174708	Chr1B	P0C8S1.1 RecName: Full=Probable disease resistance RPP8-like protein 2 && PF00931:NB-ARC domain|PF18052:Rx N-terminal domain	NB-ARC
TraesCS1B03G0108700	TraesCS1B02G048500	0	1.10762	0	8.1941	4.03627	23.7916	0.369207	12.0073	-4.98304	0.001269	0.0190555	Chr1B	Q43210.1 RecName: Full=Phenylalanine ammonia-lyase && PF00221:Aromatic amino acid lyase	-
TraesCS1B03G0128200	TraesCS1B02G055200	15.748	35.4439	23.7807	53.7169	64.5803	53.7514	24.9909	57.3495	-1.20078	0.00382614	0.0419126	Chr1B	Q4JL76.1 RecName: Full=Myb-related protein MYBAS2 && PF00249:Myb-like DNA-binding domain	Myb_DNA-binding
TraesCS1B03G0194400	TraesCS1B02G077300	13.6483	5.53811	10.3394	31.866	59.535	19.3857	9.84193	36.9289	-1.89922	0.0016466	0.0230155	Chr1B	PF02782:FGGY family of carbohydrate kinases, C-terminal domain	-
TraesCS1B03G0233100	TraesCS1B02G088600	0	0	0	13.6568	8.07254	6.16819	0	9.29919	-5.57134	0.00048453	0.00926734	Chr1B	Q39224.1 RecName: Full=Protein SRG1; Short=AtSRG1; AltName: Full=Protein SENESCENCE-RELATED GENE 1 && PF03171:2OG-Fe(II) oxygenase superfamily|PF14226:non-haem dioxygenase in morphine synthesis N-terminal	2OG-FeII_Oxy
TraesCS1B03G0235500	TraesCS1B02G088900	5.24933	17.722	5.16971	53.7169	35.3174	265.232	9.38033	118.089	-3.65823	0.000478798	0.00918794	Chr1B	Q6IEQ7.1 RecName: Full=WRKY transcription factor WRKY24; Short=OsWRKY24 && PF03106:WRKY DNA -binding domain	WRKY
TraesCS1B03G0274000	TraesCS1B02G101800	41.9947	37.6592	36.188	95.5979	96.8705	117.196	38.6139	103.221	-1.41927	4.28e-06	0.000227365	Chr1B	Q9MAA2.1 RecName: Full=Phosphoglycerate mutase-like protein AT74; Short=At-74 && PF00300:Histidine phosphatase superfamily (branch 1)	-
TraesCS1B03G0338400	TraesCS1B02G124300	45.1443	31.0134	22.7467	5.46273	6.0544	9.69287	32.9681	7.07	2.2157	0.000223891	0.00517159	Chr1B	A6QRA1.1 RecName: Full=DNA-directed RNA polymerase V subunit 7 && -	-
TraesCS1B03G0352100	TraesCS1B02G130200	106.037	162.821	96.1567	67.3737	59.535	39.6527	121.671	55.5205	1.13234	0.000411944	0.00816337	Chr1B	Q8VYA5.1 RecName: Full=Serine/arginine-rich splicing factor RS2Z33; AltName: Full=RS-containing zinc finger protein 33; Short=At-RS2Z33; Short=At-RSZ33; Short=AtRSZ33 && PF00076:RNA recognition motif. (a.k.a. RRM, R	zf-CCHC
TraesCS1B03G0368500	TraesCS1B02G135800	19.9475	12.1838	12.4073	80.1201	34.3083	26.4351	14.8462	46.9545	-1.66087	0.00206873	0.0268997	Chr1B	P43400.1 RecName: Full=Metallothionein-like protein 1; Short=MT-1 && -	-
TraesCS1B03G0387000	TraesCS1B02G141700	164.829	237.031	240.909	499.84	440.962	1015.11	214.256	651.97	-1.60634	2.95e-09	4.75e-07	Chr1B	P43279.2 RecName: Full=NADP-dependent malic enzyme, chloroplastic; Short=NADP-ME; Flags: Precursor && PF03949:Malic enzyme, NAD binding domain|PF00390:Malic enzyme, N-terminal domain	Malic_M
TraesCS1B03G0462300	TraesCS1B02G159700	191.076	119.623	140.616	340.51	500.497	366.567	150.438	402.525	-1.41813	4.26e-10	8.83e-08	Chr1B	Q7XDY9.1 RecName: Full=Rubisco accumulation factor 1, chloroplastic; Flags: Precursor && PF18087:Rubisco Assembly chaperone C-terminal domain|PF18578:Rubisco accumulation factor 1 alpha helical domain|PF18579:Rubisc	-
TraesCS1B03G0472300	TraesCS1B02G162100	94.488	129.592	92.0209	210.315	318.865	269.638	105.367	266.273	-1.33814	2.55e-08	3.13e-06	Chr1B	PF02037:SAP domain	SAP
TraesCS1B03G0493300	TraesCS1B02G167200	22.0472	49.843	26.8825	109.255	91.8251	61.6819	32.9242	87.5872	-1.41476	0.00029007	0.00629922	Chr1B	Q9AV71.1 RecName: Full=Cellulose synthase A catalytic subunit 7 [UDP-forming]; AltName: Full=OsCesA7 && PF14569:Zinc-binding RING-finger|PF03552:Cellulose synthase	-
TraesCS1B03G0501600	TraesCS1B02G170100	311.81	271.368	308.115	1472.21	1808.25	474.951	297.098	1251.8	-2.07484	0.000139269	0.00361174	Chr1B	PF00445:Ribonuclease T2 family	Ribonuclease_T2
TraesCS1B03G0516100	TraesCS1B02G174100	34.6456	34.3363	63.0705	82.8515	86.7798	100.453	44.0175	90.0282	-1.03043	0.00252581	0.0310703	Chr1B	PF04520:Senescence regulator	-
TraesCS1B03G0549100	TraesCS1B02G186300	981.625	757.614	881.953	1978.42	2799.15	2048.72	873.731	2275.43	-1.38038	5.02e-17	4.67e-14	Chr1B	Q42850.1 RecName: Full=Protochlorophyllide reductase B, chloroplastic; Short=PCR B; AltName: Full=NADPH-protochlorophyllide oxidoreductase B; Short=POR B; Flags: Precursor && PF00106:short chain dehydrogenase	adh_short
TraesCS1B03G0574000	TraesCS1B02G194100	2.09973	0	4.13577	7.28365	11.0997	37.8903	2.0785	18.7579	-3.16039	0.0020145	0.0264162	Chr1B	Q06398.2 RecName: Full=Probable glutathione S-transferase GSTU6; AltName: Full=28 kDa cold-induced protein && PF13417:Glutathione S-transferase, N-terminal domain	-
TraesCS1B03G0574900	TraesCS1B02G194900	13.6483	6.64573	5.16971	53.7169	32.2902	52.8702	8.4879	46.2924	-2.44816	8.41e-06	0.000390544	Chr1B	Q9FUS8.1 RecName: Full=Glutathione S-transferase U17; Short=AtGSTU17; AltName: Full=GST class-tau member 17; AltName: Full=Glutathione S-transferase 30; AltName: Full=Protein EARLY RESPONSIVE TO DEHYDRATION 9 && PF0	GST_N
TraesCS1B03G0576000	TraesCS1B02G195600	6.2992	11.0762	7.2376	40.9705	40.3627	46.702	8.20434	42.6784	-2.38464	7.43e-06	0.000354241	Chr1B	-	-
TraesCS1B03G0587600	TraesCS1B02G201000	19.9475	37.6592	36.188	70.1051	63.5712	62.5631	31.2649	65.4131	-1.06641	0.00476611	0.0485558	Chr1B	Q8W4F1.1 RecName: Full=Probable plastid-lipid-associated protein 10, chloroplastic; AltName: Full=Fibrillin-8; Flags: Precursor && PF04755:PAP_fibrillin	-
TraesCS1B03G0619700	TraesCS1B02G212600	44.0944	15.5067	35.1541	86.4933	203.832	158.611	31.5851	149.645	-2.23928	9.32e-09	1.3e-06	Chr1B	PF05899:Protein of unknown function (DUF861)	Cupin_3
TraesCS1B03G0649800	TraesCS1B02G225000	38.8451	74.2107	169.567	27.3137	28.2539	33.4845	94.2075	29.684	1.6662	0.000280272	0.00613818	Chr1B	Q05085.1 RecName: Full=Protein NRT1/ PTR FAMILY 6.3; Short=AtNPF6.3; AltName: Full=Nitrate transporter 1.1; Short=AtNRT1; AltName: Full=Nitrate/chlorate transporter; AltName: Full=Protein CHLORINA 1 && PF00854:POT f	-
TraesCS1B03G0659600	TraesCS1B02G229000	30.4461	18.8296	33.0862	49.1646	61.5531	88.9982	27.454	66.572	-1.27623	0.00159778	0.0225048	Chr1B	O23553.3 RecName: Full=Beta-amylase 3, chloroplastic; AltName: Full=1,4-alpha-D-glucan maltohydrolase; AltName: Full=Beta-amylase 8; AltName: Full=Chloroplast beta-amylase; Short=CT-BMY; Flags: Precursor && PF01373:	-
TraesCS1B03G0662800	TraesCS1B02G230500	140.682	73.1031	109.598	210.315	294.648	179.759	107.794	228.241	-1.07941	8.99e-05	0.00256119	Chr1B	Q336R9.2 RecName: Full=Peptide methionine sulfoxide reductase A4, chloroplastic; Short=OsMSRA4; AltName: Full=Peptide-methionine (S)-S-oxide reductase; Short=Peptide Met(O) reductase; AltName: Full=Protein-methionin	PMSR
TraesCS1B03G0693200	TraesCS1B02G244300	1.04987	4.43049	4.13577	10.9255	11.0997	33.4845	3.20538	18.5032	-2.53669	0.00421742	0.0447211	Chr1B	Q8LEA8.2 RecName: Full=Phytochrome A-associated F-box protein; AltName: Full=Empfindlicher im dunkelroten Licht protein 1 && -	-
TraesCS1B03G0725400	TraesCS1B02G257400	43.0445	47.6278	37.2219	98.3292	168.514	171.828	42.6314	146.224	-1.7789	1.35e-08	1.78e-06	Chr1B	Q39089.1 RecName: Full=Protein PALE CRESS, chloroplastic; Flags: Precursor && -	-
TraesCS1B03G0731600	TraesCS1B02G260300	9.4488	15.5067	3.10183	44.6123	97.8795	17.6234	9.35245	53.3718	-2.51618	0.000110387	0.00301875	Chr1B	O49339.1 RecName: Full=PTI1-like tyrosine-protein kinase 2; Short=PTI1-2 && PF07714:Protein tyrosine and serine/threonine kinase	Pkinase_Tyr
TraesCS1B03G0732700	TraesCS1B02G260800	25.1968	14.3991	23.7807	64.6424	115.034	74.0183	21.1255	84.5648	-1.99537	6.36e-07	4.71e-05	Chr1B	Q9P7U1.1 RecName: Full=Uncharacterized AIM2 family protein C977.15 && PF01738:Dienelactone hydrolase family	-
TraesCS1B03G0734300	TraesCS1B02G261800	112.336	53.1659	45.4935	202.121	177.596	101.335	70.3317	160.351	-1.18763	0.000803264	0.0135402	Chr1B	Q6ATY4.1 RecName: Full=UPF0603 protein Os05g0401100, chloroplastic; Flags: Precursor >A2Y4G9.2 RecName: Full=UPF0603 protein OsI_019212, chloroplastic; Flags: Precursor && PF04536:TPM domain	-
TraesCS1B03G0743300	TraesCS1B02G265900	66.1416	57.5964	66.1723	152.957	144.297	259.945	63.3034	185.733	-1.55379	8.12e-08	8.32e-06	Chr1B	Q6L545.1 RecName: Full=Gibberellin receptor GID1; AltName: Full=Gibberellin-insensitive dwarf protein 1; AltName: Full=Protein GIBBERELLIN INSENSITIVE DWARF1 && PF07859:alpha/beta hydrolase fold	Abhydrolase_3
TraesCS1B03G0749900	TraesCS1B02G268400	51.4435	71.9955	35.1541	110.165	168.514	111.909	52.8643	130.196	-1.30145	6.3e-05	0.00191874	Chr1B	Q05627.2 RecName: Full=Uncharacterized protein Cbei_0202; AltName: Full=ORF1 && PF01494:FAD binding domain	FAD_binding_3
TraesCS1B03G0760500	TraesCS1B02G272700	6.2992	14.3991	8.27154	34.5973	57.5168	37.0091	9.65661	43.0411	-2.15959	6.33e-05	0.00192645	Chr1B	Q01398.1 RecName: Full=Haloacetate dehalogenase H-1 && PF12697:Alpha/beta hydrolase family	-
TraesCS1B03G0775000	TraesCS1B02G279100	29.3963	11.0762	10.3394	63.7319	39.3536	38.7715	16.9373	47.2857	-1.48005	0.0038049	0.0417258	Chr1B	P52580.1 RecName: Full=Isoflavone reductase homolog IRL && PF05368:NmrA-like family	NmrA
TraesCS1B03G0800900	TraesCS1B02G287500	44.0944	32.1211	39.2898	89.2247	75.68	206.194	38.5018	123.7	-1.68507	1.57e-05	0.000644852	Chr1B	PF14559:Tetratricopeptide repeat	-
TraesCS1B03G0810200	TraesCS1B02G289900	23.0971	8.86098	29.9843	49.1646	62.5622	83.7112	20.6475	65.146	-1.6529	0.000284819	0.00620877	Chr1B	Q9LZN0.1 RecName: Full=Rop guanine nucleotide exchange factor 7; Short=AtRopGEF7; AltName: Full=Rho of plants guanine nucleotide exchange factor 7 && PF03759:PRONE (Plant-specific Rop nucleotide exchanger)	DUF315
TraesCS1B03G0817000	TraesCS1B02G293100	23.0971	28.7982	17.577	81.941	65.5894	52.8702	23.1574	66.8002	-1.5309	0.000122845	0.00328348	Chr1B	P0DKK6.1 RecName: Full=Laccase-13; AltName: Full=Benzenediol:oxygen oxidoreductase 13; AltName: Full=Diphenol oxidase 13; AltName: Full=Urishiol oxidase 13; Flags: Precursor >B9FJH4.2 RecName: Full=Laccase-12; AltNa	-
TraesCS1B03G0819300	TraesCS1B02G294300	2648.81	1670.29	2009.98	5043.01	4703.26	4223.45	2109.7	4656.58	-1.14208	2.62e-12	8.98e-10	Chr1B	Q9LHA8.1 RecName: Full=Probable mediator of RNA polymerase II transcription subunit 37c; AltName: Full=Heat shock 70 kDa protein 4; AltName: Full=Heat shock cognate 70 kDa protein 4; AltName: Full=Heat shock cognate	HSP70
TraesCS1B03G0831000	TraesCS1B02G299300	0	0	0	11.8359	3.0272	7.04936	0	7.30416	-5.22592	0.00228136	0.0288312	Chr1B	-	-
TraesCS1B03G0849200	TraesCS1B02G308500	91.3384	18.8296	46.5274	150.225	166.496	133.938	52.2318	150.22	-1.5209	9.97e-05	0.00279585	Chr1B	-	-
TraesCS1B03G0856300	TraesCS1B02G311200	31.496	8.86098	16.5431	61.911	65.5894	34.3656	18.9667	53.9553	-1.50287	0.00252206	0.0310351	Chr1B	Q9LZV4.1 RecName: Full=Serine/threonine-protein kinase STN8, chloroplastic; AltName: Full=Protein STATE TRANSITION 8; Flags: Precursor && PF00069:Protein kinase domain	Pkinase
TraesCS1B03G0896700	TraesCS1B02G326800	1.04987	0	2.06789	4.55228	6.0544	29.9598	1.03925	13.5222	-3.68616	0.00395151	0.0428219	Chr1B	P14895.1 RecName: Full=High molecular mass early light-inducible protein HV58, chloroplastic; Short=ELIP; Flags: Precursor && PF00504:Chlorophyll A-B binding protein	-
TraesCS1B03G0896900	TraesCS1B02G326900	2.09973	5.53811	10.3394	32.7764	16.1451	66.9689	5.99242	38.6301	-2.68907	0.000114132	0.00311142	Chr1B	P14895.1 RecName: Full=High molecular mass early light-inducible protein HV58, chloroplastic; Short=ELIP; Flags: Precursor && -	-
TraesCS1B03G0907900	TraesCS1B02G331300	40.9448	14.3991	29.9843	72.8365	82.7435	66.0878	28.4427	73.8892	-1.37253	0.000610483	0.0110233	Chr1B	Q9LSY7.1 RecName: Full=Peroxidase 30; Short=Atperox P30; AltName: Full=ATP7a; AltName: Full=PRXR9; Flags: Precursor && PF00141:Peroxidase	-
TraesCS1B03G0909500	TraesCS1B02G331700	54.593	36.5515	41.3577	106.523	139.251	113.671	44.1674	119.815	-1.43725	2.05e-06	0.000122599	Chr1B	PF09353:Domain of unknown function (DUF1995)	-
TraesCS1B03G0930600	TraesCS1B02G339000	89.2386	46.5201	48.5953	186.643	194.75	79.3053	61.4514	153.566	-1.3191	0.000280348	0.00613818	Chr1B	Q43636.1 RecName: Full=Thioredoxin H-type; Short=Trx-H && PF00085:Thioredoxin	-
TraesCS1B03G0931500	TraesCS1B02G339500	9.4488	4.43049	7.2376	24.5823	39.3536	14.9799	7.03896	26.3053	-1.89371	0.00443123	0.046196	Chr1B	Q5ZBY9.1 RecName: Full=Photosystem II reaction center W protein, chloroplastic; AltName: Full=PSII 6.1 kDa protein; Flags: Precursor && PF07123:Photosystem II reaction centre W protein (PsbW)	-
TraesCS1B03G0950100	TraesCS1B02G346500	59.8424	54.2735	53.765	25.4928	25.2267	28.1974	55.9603	26.3056	1.08813	0.00411346	0.0440295	Chr1B	Q8VYE2.1 RecName: Full=Mitochondrial import inner membrane translocase subunit TIM50; AltName: Full=Protein EMBRYO DEFECTIVE 1860; Flags: Precursor && PF03031:NLI interacting factor-like phosphatase	NIF
TraesCS1B03G0967200	TraesCS1B02G353700	70.341	79.7488	88.9191	131.106	155.396	218.53	79.6696	168.344	-1.08007	6.86e-05	0.0020595	Chr1B	P69781.1 RecName: Full=GATA transcription factor 12 && PF00320:GATA zinc finger	GATA
TraesCS1B03G0969100	TraesCS1B02G354600	62.992	45.4125	42.3917	65.5528	135.215	106.622	50.2654	102.463	-1.02537	0.00289276	0.0342664	Chr1B	PF00612:IQ calmodulin-binding motif|PF13178:Protein of unknown function (DUF4005)	IQ
TraesCS1B03G0982500	TraesCS1B02G360500	93.4381	37.6592	83.7494	259.48	363.264	260.826	71.6155	294.523	-2.03621	1.79e-12	6.39e-10	Chr1B	-	-
TraesCS1B03G0985600	TraesCS1B02G361800	0	0	0	7.28365	7.06347	9.69287	0	8.01333	-5.35754	0.00107568	0.016853	Chr1B	Q39010.2 RecName: Full=Shaggy-related protein kinase zeta; AltName: Full=ASK-zeta && -	-
TraesCS1B03G1002600	TraesCS1B02G367300	16.7979	18.8296	16.5431	50.0751	60.544	32.6033	17.3902	47.7408	-1.45507	0.00147166	0.0211993	Chr1B	-	-
TraesCS1B03G1003000	TraesCS1B02G367500	1559.05	1301.46	1190.07	4255.47	2661.92	2048.72	1350.19	2988.7	-1.14636	6.74e-08	7.15e-06	Chr1B	Q6F357.1 RecName: Full=Phospholipase A1-II 7 >A2Y7R2.1 RecName: Full=Phospholipase A1-II 7 && PF01764:Lipase (class 3)	Lipase_3
TraesCS1B03G1037600	TraesCS1B02G381200	54.593	57.5964	49.6293	150.225	178.605	148.918	53.9396	159.249	-1.56171	2.52e-09	4.13e-07	Chr1B	P14928.1 RecName: Full=ABA-inducible protein PHV A1 && PF02987:Late embryogenesis abundant protein	-
TraesCS1B03G1038000	TraesCS1B02G381400	0	0	0	25.4928	13.1179	8.8117	0	15.8074	-6.3368	1.4e-05	0.000586561	Chr1B	P14928.1 RecName: Full=ABA-inducible protein PHV A1 && PF02987:Late embryogenesis abundant protein	-
TraesCS1B03G1065800	TraesCS1B02G393900	0	0	1.03394	14.5673	19.1723	11.4552	0.344648	15.0649	-5.30326	0.000210062	0.0049289	Chr1B	-	-
TraesCS1B03G1071700	TraesCS1B02G396800	384.251	410.928	389.796	752.036	921.278	837.112	394.992	836.809	-1.08289	4.12e-13	1.84e-10	Chr1B	A7XN92.1 RecName: Full=CRM-domain containing factor CFM3, chloroplastic/mitochondrial; AltName: Full=Protein CRM FAMILY MEMBER 3; Short=ZmCFM3; Flags: Precursor && PF01985:CRS1 / YhbY (CRM) domain	-
TraesCS1B03G1104100	TraesCS1B02G410600	9.4488	18.8296	132.345	3.64182	7.06347	6.16819	53.541	5.62449	3.2559	3.63e-05	0.0012517	Chr1B	Q9LXA5.1 RecName: Full=L-type lectin-domain containing receptor kinase IX.1; Short=LecRK-IX.1; Flags: Precursor && PF00182:Chitinase class I|PF00069:Protein kinase domain	Pkinase
TraesCS1B03G1132200	TraesCS1B02G420000	1.04987	3.32287	0	17.2987	10.0907	22.9104	1.45758	16.7666	-3.55312	0.000803643	0.0135402	Chr1B	Q9SEE4.1 RecName: Full=Pirin-like protein && PF05726:Pirin C-terminal cupin domain|PF02678:Pirin	-
TraesCS1B03G1132300	TraesCS1B02G420100	20.9973	2.21524	17.577	106.523	172.551	50.2267	13.5965	109.767	-3.00353	1.68e-08	2.15e-06	Chr1B	P20143.1 RecName: Full=Photosystem I reaction center subunit VI, chloroplastic; Short=PSI-H; AltName: Full=Light-harvesting complex I 11 kDa protein; Flags: Precursor && PF03244:Photosystem I reaction centre subunit	-
TraesCS1B03G1160800	TraesCS1B02G429200	290.813	204.91	246.078	723.812	955.587	710.223	247.267	796.541	-1.68637	1.37e-19	1.77e-16	Chr1B	P51373.1 RecName: Full=Uncharacterized protein ycf23 (chloroplast) [Porphyra purpurea] && PF04481:Protein of unknown function (DUF561)	-
TraesCS1B03G1163300	TraesCS1B02G429900	61.9421	67.565	39.2898	144.762	118.061	101.335	56.2656	121.386	-1.11106	0.000273227	0.00601057	Chr1B	Q9SSU8.1 RecName: Full=Phytoene synthase, chloroplastic; Flags: Precursor && -	-
TraesCS1B03G1172500	TraesCS1B02G434400	62.992	67.565	78.5796	126.553	180.623	133.938	69.7122	147.038	-1.07453	6.59e-05	0.00199097	Chr1B	Q831T9.1 RecName: Full=GTPase Era && PF07650:KH domain|PF01926:50S ribosome-binding GTPase	-
TraesCS1B03G1175500	TraesCS1B02G435900	55.6429	55.3811	189.212	10.015	41.3718	24.6728	100.079	25.3532	1.98768	0.000131122	0.0034505	Chr1B	Q93YP9.1 RecName: Full=Sugar transporter ERD6-like 4 && PF00083:Sugar (and other) transporter	Sugar_tr
TraesCS1B03G1177500	TraesCS1B02G436700	81.8896	48.7354	62.0366	318.66	437.935	249.371	64.2205	335.322	-2.38154	6.16e-19	7.16e-16	Chr1B	O22386.2 RecName: Full=50S ribosomal protein L12, chloroplastic; AltName: Full=CL12; Flags: Precursor && PF00542:Ribosomal protein L7/L12 C-terminal domain|PF16320:Ribosomal protein L7/L12 dimerisation domain	-
TraesCS1B03G1183000	TraesCS1B02G439700	201.574	101.901	142.684	262.211	357.21	333.963	148.72	317.795	-1.09389	9.27e-06	0.000420229	Chr1B	PF11341:Protein of unknown function (DUF3143)	-
TraesCS1B03G1192100	TraesCS1B02G443700	69.2912	49.843	47.5614	128.374	166.496	103.097	55.5652	132.656	-1.25307	3.17e-05	0.00112593	Chr1B	Q7XJJ7.1 RecName: Full=Fatty acid amide hydrolase; AltName: Full=N-acylethanolamine amidohydrolase && PF01425:Amidase	Amidase
TraesCS1B03G1198500	TraesCS1B02G446900	12.5984	6.64573	17.577	104.702	47.4262	17.6234	12.2737	56.584	-2.20035	0.000292614	0.00634497	Chr1B	-	-
TraesCS1B03G1209500	TraesCS1B02G451100	0	0	0	12.7464	19.1723	6.16819	0	12.6956	-6.01672	7.03e-05	0.00209471	Chr1B	P27523.1 RecName: Full=Chlorophyll a-b binding protein of LHCII type III, chloroplastic; Short=CAB; Flags: Precursor && PF00504:Chlorophyll A-B binding protein	-
TraesCS1B03G1221000	TraesCS1B02G455700	17.8477	11.0762	3.10183	47.3437	69.6256	18.5046	10.6753	45.158	-2.07952	0.000919039	0.0149671	Chr1B	-	-
TraesCS1B03G1221900	TraesCS1B02G456300	0	0	0	5.46273	3.0272	17.6234	0	8.70445	-5.48059	0.0010953	0.0170739	Chr1B	Q9ASQ7.1 RecName: Full=S-type anion channel SLAH2; AltName: Full=SLAC1-homolog protein 2 && PF03595:Voltage-dependent anion channel	C4dic_mal_tran
TraesCS1B03G1237800	TraesCS1B02G461800	23.0971	43.1973	13.4413	75.5678	94.8523	85.4735	26.5785	85.2979	-1.68764	3.19e-05	0.00112958	Chr1B	Q9SV26.2 RecName: Full=Pentatricopeptide repeat-containing protein At4g01030, mitochondrial; Flags: Precursor && PF14432:DYW family of nucleic acid deaminases|PF13041:PPR repeat family	-
TraesCS1B03G1244800	TraesCS1B02G465200	20.9973	43.1973	35.1541	2.73137	3.0272	2.64351	33.1162	2.80069	3.56569	8.99e-07	6.19e-05	Chr1B	-	-
TraesCS1B03G1248500	TraesCS1B02G467100	33.5957	34.3363	38.2559	70.1051	103.934	59.0384	35.396	77.6925	-1.13082	0.00165077	0.0230463	Chr1B	O24621.1 RecName: Full=RNA polymerase sigma factor sigC; Short=Sigma factor C; Short=Sigma-C; AltName: Full=RNA polymerase sigma factor sig3; Short=Atsig3; Short=Sigma factor 3; Flags: Precursor && PF04542:Sigma-70	Sigma70_r3
TraesCS1B03G1271300	TraesCS1B02G475800	32.5459	29.9058	44.4595	65.5528	73.6619	92.5229	35.6371	77.2459	-1.11507	0.0014768	0.0212394	Chr1B	PF13359:DDE superfamily endonuclease	-
TraesCS1B03G1273800	TraesCS1B02G476400	13.6483	6.64573	7.2376	24.5823	32.2902	38.7715	9.1772	31.8813	-1.79471	0.00191586	0.0255063	Chr1B	Q9SBQ9.1 RecName: Full=Flavonoid 3'-monooxygenase; AltName: Full=Cytochrome P450 75B2; AltName: Full=Flavonoid 3'-hydroxylase [Petunia x hybrida] && PF00067:Cytochrome P450	p450
TraesCS1D03G0025200	TraesCS1D02G012100	0	0	0	10.9255	4.03627	4.40585	0	6.45586	-5.04624	0.0040982	0.0439133	Chr1D	P84968.1 RecName: Full=Defensin Tk-AMP-D2 && -	-
TraesCS1D03G0025500	TraesCS1D02G012300	1.04987	2.21524	8.27154	178.449	85.7707	66.9689	3.84555	110.396	-4.83053	2.61e-15	1.87e-12	Chr1D	P22220.1 RecName: Full=Arginine decarboxylase; Short=ADC; Short=ARGDC && PF02784:Pyridoxal-dependent decarboxylase, pyridoxal binding domain	-
TraesCS1D03G0035200	TraesCS1D02G017500	20.9973	21.0448	89.953	5.46273	17.1541	14.0987	43.9984	12.2385	1.85209	0.00399761	0.0431879	Chr1D	Q84TH6.1 RecName: Full=Dirigent protein 23; Short=AtDIR23; Flags: Precursor && PF03018:Dirigent-like protein	-
TraesCS1D03G0036900	TraesCS1D02G019100	1184.25	927.08	1278.99	2926.2	2970.69	2690.21	1130.11	2862.37	-1.34034	1.13e-20	1.72e-17	Chr1D	P16166.1 RecName: Full=Anthocyanidin 3-O-glucosyltransferase; AltName: Full=Bronze-1; AltName: Full=Bz-McC allele; AltName: Full=Flavonol 3-O-glucosyltransferase; AltName: Full=UDP-glucose flavonoid 3-O-glucosyltran	UDPGT
TraesCS1D03G0037000	TraesCS1D02G019200	130.183	136.238	146.82	374.197	321.892	423.843	137.747	373.311	-1.43906	2.02e-13	9.94e-11	Chr1D	P16167.1 RecName: Full=Anthocyanidin 3-O-glucosyltransferase; AltName: Full=Bronze-1; AltName: Full=Bz-W22 allele; AltName: Full=Flavonol 3-O-glucosyltransferase; AltName: Full=UDP-glucose flavonoid 3-O-glucosyltran	UDPGT
TraesCS1D03G0039600	TraesCS1D02G020700	82.9394	93.0403	79.6136	235.808	205.85	183.283	85.1978	208.314	-1.29055	2.75e-08	3.34e-06	Chr1D	Q9ZWB4.1 RecName: Full=Coumaroyl-CoA:anthocyanidin 3-O-glucoside-6''-O-coumaroyltransferase 1 && PF02458:Transferase family	-
TraesCS1D03G0051000	TraesCS1D02G027300	430.445	166.143	163.363	1067.05	1039.34	958.713	253.317	1021.7	-2.01178	1.71e-05	0.000684527	Chr1D	P01053.2 RecName: Full=Subtilisin-chymotrypsin inhibitor-2A; Short=CI-2A && -	-
TraesCS1D03G0058000	TraesCS1D02G030500	49.3437	15.5067	34.1201	101.061	88.7979	58.1572	32.9902	82.6719	-1.32117	0.0013952	0.0204099	Chr1D	-	-
TraesCS1D03G0065300	TraesCS1D02G034600	4.19947	12.1838	10.3394	26.4032	25.2267	45.8208	8.90758	32.4836	-1.8722	0.00184513	0.0248639	Chr1D	Q5NDL1.1 RecName: Full=EGF domain-specific O-linked N-acetylglucosamine transferase; AltName: Full=Extracellular O-linked N-acetylglucosamine transferase; Flags: Precursor && PF04577:Protein of unknown function (DUF	-
TraesCS1D03G0078100	TraesCS1D02G039000	10.4987	11.0762	15.5091	54.6273	38.3446	20.2669	12.3613	37.7463	-1.60789	0.00348935	0.0391961	Chr1D	Q9M353.1 RecName: Full=Cation/H(+) antiporter 20; AltName: Full=Protein CATION/H+ EXCHANGER 20; Short=AtCHX20 && PF00999:Sodium/hydrogen exchanger family	Na_H_Exchanger
TraesCS1D03G0085000	TraesCS1D02G042100	68.2413	56.4887	83.7494	173.897	133.197	111.909	69.4931	139.668	-1.00543	0.000417871	0.0082527	Chr1D	Q9SIB2.1 RecName: Full=3-ketoacyl-CoA synthase 12; Short=KCS-12; AltName: Full=Very long-chain fatty acid condensing enzyme 12; Short=VLCFA condensing enzyme 12; Flags: Precursor && PF08392:FAE1/Type III polyketide	-
TraesCS1D03G0089900	TraesCS1D02G043300	56.6928	50.9506	35.1541	122.001	155.396	96.0475	47.5992	124.482	-1.38611	1.09e-05	0.000476405	Chr1D	Q4JL76.1 RecName: Full=Myb-related protein MYBAS2 && PF00249:Myb-like DNA-binding domain	Myb_DNA-binding
TraesCS1D03G0115300	TraesCS1D02G052200	265.616	187.188	248.146	607.274	560.032	306.647	233.65	491.318	-1.07113	1.03e-05	0.000455304	Chr1D	A1L4Y2.1 RecName: Full=Alcohol dehydrogenase-like 3 && PF00107:Zinc-binding dehydrogenase|PF08240:Alcohol dehydrogenase GroES-like domain	ADH_N
TraesCS1D03G0127000	TraesCS1D02G058300	53.5432	35.4439	32.0522	95.5979	112.006	109.265	40.3464	105.623	-1.38754	1.4e-05	0.000586291	Chr1D	Q42843.1 RecName: Full=Glutamyl-tRNA reductase 1, chloroplastic; Short=GluTR; Flags: Precursor && PF00745:Glutamyl-tRNAGlu reductase, dimerisation domain|PF01488:Shikimate / quinate 5-dehydrogenase|PF05201:Glutamyl-	-
TraesCS1D03G0130600	TraesCS1D02G060000	41.9947	40.982	46.5274	119.27	204.841	109.265	43.168	144.458	-1.7396	6.09e-08	6.55e-06	Chr1D	PF02782:FGGY family of carbohydrate kinases, C-terminal domain|PF00370:FGGY family of carbohydrate kinases, N-terminal domain	FGGY_N
TraesCS1D03G0141300	TraesCS1D02G063800	25.1968	13.2915	5.16971	0.910456	1.00907	2.64351	14.5527	1.52101	3.24222	0.00239585	0.0298347	Chr1D	-	-
TraesCS1D03G0166000	TraesCS1D02G072500	11.5485	9.9686	9.30548	37.3287	57.5168	26.4351	10.2742	40.4269	-1.97263	0.000259125	0.00578798	Chr1D	-	-
TraesCS1D03G0166200	TraesCS1D02G072700	0	0	0	28.2241	8.07254	14.9799	0	17.0922	-6.45182	8.55e-06	0.000394814	Chr1D	Q39224.1 RecName: Full=Protein SRG1; Short=AtSRG1; AltName: Full=Protein SENESCENCE-RELATED GENE 1 && PF03171:2OG-Fe(II) oxygenase superfamily|PF14226:non-haem dioxygenase in morphine synthesis N-terminal	2OG-FeII_Oxy
TraesCS1D03G0173100	TraesCS1D02G075700	46.1941	75.3183	147.854	8.1941	40.3627	48.4644	89.7888	32.3404	1.47446	0.00442643	0.0461815	Chr1D	Q7GDL5.1 RecName: Full=Homeobox protein knotted-1-like 10; AltName: Full=Homeobox protein HOS9; AltName: Full=Homeobox protein OSH71; AltName: Full=Homeobox protein knotted-1-like 2; Short=Oskn2 >A2Y007.2 RecName: F	KNOX2
TraesCS1D03G0197900	TraesCS1D02G085700	8.39893	5.53811	15.5091	27.3137	51.4624	27.3163	9.81539	35.3641	-1.83998	0.00168147	0.023358	Chr1D	-	-
TraesCS1D03G0200500	TraesCS1D02G086800	0	0	0	8.1941	6.0544	8.8117	0	7.68674	-5.29795	0.00137477	0.0201704	Chr1D	PF06839:GRF zinc finger	zf-GRF
TraesCS1D03G0222800	TraesCS1D02G095400	31.496	34.3363	16.5431	126.553	102.925	106.622	27.4585	112.033	-2.03259	4.36e-09	6.67e-07	Chr1D	P46420.2 RecName: Full=Glutathione S-transferase 4; AltName: Full=GST class-phi member 4; AltName: Full=GST-27; AltName: Full=GST-IV && PF00043:Glutathione S-transferase, C-terminal domain|PF02798:Glutathione S-tran	GST_N
TraesCS1D03G0228100	TraesCS1D02G096900	0	0	0	93.7769	93.8433	98.6911	0	95.4371	-8.9307	3.32e-13	1.52e-10	Chr1D	F4I1S7.1 RecName: Full=Elongator complex protein 2; Short=AtELP2; AltName: Full=Elongator component 2; AltName: Full=Protein GREEN NPR1 SEEDLING ON SA MEDIUM 1 && -	-
TraesCS1D03G0228400	TraesCS1D02G097000	0	0	0	12.7464	9.08161	24.6728	0	15.5002	-6.31145	1.55e-05	0.000637517	Chr1D	-	-
TraesCS1D03G0257300	TraesCS1D02G109300	91.3384	122.946	90.987	45.5228	46.4171	59.9196	101.757	50.6198	1.00451	0.000968011	0.015577	Chr1D	Q9BYJ9.1 RecName: Full=YTH domain-containing family protein 1; AltName: Full=Dermatomyositis associated with cancer putative autoantigen 1; Short=DACA-1 && PF04146:YT521-B-like domain	YTH
TraesCS1D03G0356300	TraesCS1D02G141100	137.532	91.9327	114.768	411.526	441.971	270.519	114.744	374.672	-1.70525	8.79e-13	3.41e-10	Chr1D	Q7XDY9.1 RecName: Full=Rubisco accumulation factor 1, chloroplastic; Flags: Precursor && PF18087:Rubisco Assembly chaperone C-terminal domain|PF18578:Rubisco accumulation factor 1 alpha helical domain|PF18579:Rubisc	-
TraesCS1D03G0363700	TraesCS1D02G143900	69.2912	126.269	83.7494	200.3	276.484	251.133	93.1032	242.639	-1.38354	8.97e-08	9.08e-06	Chr1D	PF02037:SAP domain	SAP
TraesCS1D03G0371000	TraesCS1D02G146600	18.8976	21.0448	36.188	121.091	59.535	64.3254	25.3768	81.6503	-1.6848	5.78e-05	0.00179267	Chr1D	Q9AV71.1 RecName: Full=Cellulose synthase A catalytic subunit 7 [UDP-forming]; AltName: Full=OsCesA7 && PF03552:Cellulose synthase	-
TraesCS1D03G0380000	TraesCS1D02G149700	44.0944	33.2287	50.6632	2590.25	2507.53	1835.48	42.6621	2311.09	-5.75536	6.85e-164	2.39e-159	Chr1D	PF00445:Ribonuclease T2 family	Ribonuclease_T2
TraesCS1D03G0380200	TraesCS1D02G149800	4.19947	9.9686	7.2376	672.827	675.066	482	7.13522	609.964	-6.42566	1.24e-64	2.16e-60	Chr1D	P80022.2 RecName: Full=Extracellular ribonuclease LE; Short=RNase LE; Flags: Precursor && PF00445:Ribonuclease T2 family	Ribonuclease_T2
TraesCS1D03G0390300	TraesCS1D02G151500	242.519	221.524	287.436	602.722	680.111	319.865	250.493	534.233	-1.09146	7.33e-06	0.000350531	Chr1D	B5WWZ8.1 RecName: Full=Long-chain-alcohol oxidase FAO1; AltName: Full=Long-chain fatty alcohol oxidase 1 && PF05199:GMC oxidoreductase|PF00732:GMC oxidoreductase	-
TraesCS1D03G0402800	TraesCS1D02G155400	58.7925	59.8116	31.0183	132.016	109.988	107.503	49.8741	116.502	-1.22633	0.000109776	0.00300873	Chr1D	PF04520:Senescence regulator	-
TraesCS1D03G0421900	TraesCS1D02G163800	37.7952	8.86098	18.611	99.2397	58.5259	67.8501	21.7557	75.2052	-1.7863	0.000115941	0.0031472	Chr1D	-	-
TraesCS1D03G0479400	TraesCS1D02G187100	5.24933	8.86098	3.10183	20.03	20.1813	49.3455	5.73738	29.8523	-2.39013	0.000553985	0.0102745	Chr1D	PF12697:Alpha/beta hydrolase family	-
TraesCS1D03G0485400	TraesCS1D02G189600	12.5984	14.3991	18.611	27.3137	51.4624	43.1773	15.2028	40.6511	-1.41601	0.00408883	0.0438491	Chr1D	Q9FUS8.1 RecName: Full=Glutathione S-transferase U17; Short=AtGSTU17; AltName: Full=GST class-tau member 17; AltName: Full=Glutathione S-transferase 30; AltName: Full=Protein EARLY RESPONSIVE TO DEHYDRATION 9 && PF0	GST_N
TraesCS1D03G0507700	TraesCS1D02G199100	350.655	263.614	283.3	537.169	805.236	482	299.19	608.135	-1.02206	1.17e-06	7.73e-05	Chr1D	O82290.2 RecName: Full=Probable inactive shikimate kinase like 2, chloroplastic; Short=AtSKL2; Flags: Precursor && PF01202:Shikimate kinase	SKI
TraesCS1D03G0511100	TraesCS1D02G201400	99.7373	85.2869	54.799	219.42	313.82	315.459	79.9411	282.9	-1.82399	2.18e-12	7.64e-10	Chr1D	PF05899:Protein of unknown function (DUF861)	Cupin_3
TraesCS1D03G0546200	TraesCS1D02G219100	234.12	145.099	129.243	381.481	373.355	305.766	169.487	353.534	-1.06002	5.67e-06	0.000283258	Chr1D	Q336R9.2 RecName: Full=Peptide methionine sulfoxide reductase A4, chloroplastic; Short=OsMSRA4; AltName: Full=Peptide-methionine (S)-S-oxide reductase; Short=Peptide Met(O) reductase; AltName: Full=Protein-methionin	PMSR
TraesCS1D03G0569800	TraesCS1D02G232200	4.19947	4.43049	0	16.3882	11.0997	31.7221	2.87665	19.7367	-2.79249	0.00198044	0.026102	Chr1D	Q8LEA8.2 RecName: Full=Phytochrome A-associated F-box protein; AltName: Full=Empfindlicher im dunkelroten Licht protein 1 && -	-
TraesCS1D03G0597100	TraesCS1D02G246100	55.6429	63.1345	54.799	95.5979	142.278	140.106	57.8588	125.994	-1.12287	9.76e-05	0.00275062	Chr1D	Q39089.1 RecName: Full=Protein PALE CRESS, chloroplastic; Flags: Precursor && -	-
TraesCS1D03G0602700	TraesCS1D02G249000	13.6483	9.9686	4.13577	46.4332	93.8433	46.702	9.25088	62.3262	-2.75205	2.2e-07	1.91e-05	Chr1D	Q9FFW5.1 RecName: Full=Proline-rich receptor-like protein kinase PERK8; AltName: Full=Proline-rich extensin-like receptor kinase 8; Short=AtPERK8 && PF07714:Protein tyrosine and serine/threonine kinase	Pkinase_Tyr
TraesCS1D03G0603200	TraesCS1D02G249300	36.7453	27.6906	4.13577	2.73137	0	0.88117	22.8572	1.20418	4.21772	0.000110998	0.0030331	Chr1D	Q9ZT66.1 RecName: Full=Endo-1,3;1,4-beta-D-glucanase; Flags: Precursor && PF01738:Dienelactone hydrolase family	-
TraesCS1D03G0606500	TraesCS1D02G250800	7.34906	7.75336	4.13577	27.3137	40.3627	28.1974	6.41273	31.9579	-2.31891	0.000154369	0.00390741	Chr1D	-	-
TraesCS1D03G0613500	TraesCS1D02G254500	109.186	121.838	149.922	281.331	332.992	487.287	126.982	367.203	-1.53215	1.6e-10	3.69e-08	Chr1D	Q6L545.1 RecName: Full=Gibberellin receptor GID1; AltName: Full=Gibberellin-insensitive dwarf protein 1; AltName: Full=Protein GIBBERELLIN INSENSITIVE DWARF1 && PF07859:alpha/beta hydrolase fold	Abhydrolase_3
TraesCS1D03G0637500	TraesCS1D02G264400	36.7453	49.843	41.3577	15.4777	10.0907	22.9104	42.6487	16.1596	1.39138	0.00366113	0.040622	Chr1D	-	-
TraesCS1D03G0639500	TraesCS1D02G265600	0	0	0	13.6568	5.04534	1.76234	0	6.8215	-5.12434	0.00412795	0.0441439	Chr1D	-	-
TraesCS1D03G0639700	TraesCS1D02G265700	25.1968	57.5964	28.9504	248.554	126.133	150.68	37.2479	175.123	-2.23832	3.44e-10	7.28e-08	Chr1D	-	-
TraesCS1D03G0647400	TraesCS1D02G269700	1.04987	8.86098	8.27154	49.1646	21.1904	27.3163	6.0608	32.5571	-2.43094	0.000412555	0.00817315	Chr1D	Q0WP01.1 RecName: Full=Protein NRT1/ PTR FAMILY 5.10; Short=AtNPF5.10 && PF00854:POT family	-
TraesCS1D03G0649600	TraesCS1D02G271100	0	0	0	14.5673	1.00907	17.6234	0	11.0666	-5.8268	0.00041149	0.00815901	Chr1D	PF06749:Protein of unknown function (DUF1218)	-
TraesCS1D03G0668000	TraesCS1D02G277900	79.7898	58.704	92.0209	100.15	157.414	265.232	76.8382	174.266	-1.18106	0.000415854	0.00822487	Chr1D	-	-
TraesCS1D03G0692800	TraesCS1D02G289400	18.8976	22.1524	16.5431	116.538	94.8523	34.3656	19.1977	81.9188	-2.09339	6.83e-06	0.000330388	Chr1D	Q56YJ8.1 RecName: Full=Transcription factor FAMA; AltName: Full=Basic helix-loop-helix protein 97; Short=AtbHLH97; Short=bHLH 97; AltName: Full=Transcription factor EN 14; AltName: Full=bHLH transcription factor bHL	HLH
TraesCS1D03G0693600	TraesCS1D02G289800	13.6483	18.8296	10.3394	27.3137	27.2448	81.0677	14.2724	45.2087	-1.66973	0.00287714	0.0341336	Chr1D	Q9ST02.2 RecName: Full=Nicotianamine aminotransferase A; AltName: Full=Nicotianamine aminotransferase III; Short=NAAT-III && PF00155:Aminotransferase class I and II	Aminotran_1_2
TraesCS1D03G0712200	TraesCS1D02G292500	46.1941	45.4125	74.4439	188.464	219.977	238.797	55.3502	215.746	-1.96041	2.23e-13	1.08e-10	Chr1D	-	-
TraesCS1D03G0719400	TraesCS1D02G301100	24.1469	8.86098	8.27154	54.6273	99.8977	40.5338	13.7598	65.0196	-2.23536	1.66e-05	0.000670289	Chr1D	Q9LZV4.1 RecName: Full=Serine/threonine-protein kinase STN8, chloroplastic; AltName: Full=Protein STATE TRANSITION 8; Flags: Precursor && PF00069:Protein kinase domain	Pkinase
TraesCS1D03G0744800	TraesCS1D02G313600	9.4488	11.0762	14.4752	59.1796	53.4806	40.5338	11.6667	51.0647	-2.12774	8.2e-06	0.000383724	Chr1D	-	-
TraesCS1D03G0757800	TraesCS1D02G319200	89.2386	42.0897	47.5614	174.808	199.795	148.037	59.6299	174.213	-1.54438	3.78e-07	3.04e-05	Chr1D	PF09353:Domain of unknown function (DUF1995)	-
TraesCS1D03G0758000	TraesCS1D02G319400	17.8477	23.2601	26.8825	83.7619	52.4715	55.5137	22.6634	63.9157	-1.49656	0.000235662	0.00538288	Chr1D	Q6AUW3.1 RecName: Full=22.3 kDa class VI heat shock protein; AltName: Full=22.3 kDa heat shock protein; Short=OsHsp22.3 && PF00011:Hsp20/alpha crystallin family	-
TraesCS1D03G0764200	TraesCS1D02G322600	0	5.53811	3.10183	6.37319	18.1632	49.3455	2.87998	24.6273	-3.10905	0.00101901	0.016198	Chr1D	Q94CH6.1 RecName: Full=GDSL esterase/lipase EXL3; AltName: Full=Family II extracellular lipase 3; Short=Family II lipase EXL3; Flags: Precursor && PF00657:GDSL-like Lipase/Acylhydrolase	Lipase_GDSL
TraesCS1D03G0791400	TraesCS1D02G334000	57.7426	57.5964	73.4099	180.27	143.288	148.037	62.9163	157.198	-1.32052	4.93e-07	3.83e-05	Chr1D	A2A1A0.1 RecName: Full=S-norcoclaurine synthase 1; Short=CjNCS1 && PF14226:non-haem dioxygenase in morphine synthesis N-terminal	-
TraesCS1D03G0791500	TraesCS1D02G334100	44.0944	55.3811	69.2742	126.553	138.242	124.245	56.2499	129.68	-1.20386	1.96e-05	0.000765943	Chr1D	Q39224.1 RecName: Full=Protein SRG1; Short=AtSRG1; AltName: Full=Protein SENESCENCE-RELATED GENE 1 && PF03171:2OG-Fe(II) oxygenase superfamily	2OG-FeII_Oxy
TraesCS1D03G0792900	TraesCS1D02G334800	5.24933	6.64573	2.06789	18.2091	31.2811	30.841	4.65432	26.7771	-2.53119	0.000319134	0.00673849	Chr1D	PF14234:Domain of unknown function (DUF4336)	-
TraesCS1D03G0806800	TraesCS1D02G341300	58.7925	37.6592	38.2559	96.5083	100.907	74.8995	44.9025	90.7715	-1.01338	0.00206983	0.026909	Chr1D	-	-
TraesCS1D03G0813600	TraesCS1D02G344700	5.24933	1.10762	10.3394	15.4777	7.06347	77.543	5.56546	33.3614	-2.57898	0.00271102	0.0326404	Chr1D	Q9M0G7.1 RecName: Full=MDIS1-interacting receptor like kinase 1; Short=AtMIK1; AltName: Full=Leucine-rich repeat receptor-like protein kinase PXL2; AltName: Full=Protein PHLOEM INTERCALATED WITH XYLEM-LIKE 2; Flags:	Pkinase_Tyr
TraesCS1D03G0814800	TraesCS1D02G345500	131.233	62.0269	85.8172	255.838	232.085	133.938	93.0258	207.287	-1.15386	0.000185193	0.00447641	Chr1D	-	-
TraesCS1D03G0821700	TraesCS1D02G349400	87.1389	67.565	102.36	228.524	388.491	258.183	85.6881	291.733	-1.76453	1.1e-11	3.28e-09	Chr1D	-	-
TraesCS1D03G0827200	TraesCS1D02G352200	61.9421	90.825	107.53	36.4182	51.4624	35.2468	86.7657	41.0425	1.08379	0.00176084	0.0241351	Chr1D	PF16455:Ubiquitin-binding domain	-
TraesCS1D03G0831800	TraesCS1D02G353700	143.832	130.699	301.911	50.0751	78.7072	103.978	192.147	77.5868	1.30857	0.000139637	0.00361992	Chr1D	PF13855:Leucine rich repeat	-
TraesCS1D03G0835100	TraesCS1D02G355200	151.181	119.623	50.6632	444.302	387.482	451.159	107.156	427.648	-1.99805	1.38e-12	5.03e-10	Chr1D	Q2KNB9.1 RecName: Full=Hexokinase-2; AltName: Full=Hexokinase-3 && PF00349:Hexokinase|PF03727:Hexokinase	-
TraesCS1D03G0841400	TraesCS1D02G358400	1.04987	1.10762	2.06789	16.3882	6.0544	16.7422	1.40846	13.0616	-3.21179	0.00358746	0.0400084	Chr1D	Q75KU4.1 RecName: Full=Calcineurin B-like protein 4 && PF13499:EF-hand domain pair	-
TraesCS1D03G0843300	TraesCS1D02G359100	8.39893	8.86098	1.03394	27.3137	25.2267	51.1079	6.09795	34.5494	-2.51229	0.000190401	0.00456927	Chr1D	Q9FMV7.1 RecName: Full=Cytochrome P450 94B1 && PF00067:Cytochrome P450	p450
TraesCS1D03G0862200	TraesCS1D02G369200	1.04987	0	0	22.7614	8.07254	9.69287	0.349955	13.5089	-5.14992	0.000501449	0.00952561	Chr1D	P14928.1 RecName: Full=ABA-inducible protein PHV A1 && PF02987:Late embryogenesis abundant protein	-
TraesCS1D03G0862300	TraesCS1D02G369300	52.4933	39.8744	77.5457	1135.34	580.214	1002.77	56.6378	906.108	-3.99708	2.63e-51	2.62e-47	Chr1D	P14928.1 RecName: Full=ABA-inducible protein PHV A1 && PF02987:Late embryogenesis abundant protein	-
TraesCS1D03G0883800	TraesCS1D02G379900	8.39893	17.722	17.577	58.2692	48.4352	22.0293	14.566	42.9112	-1.55837	0.00358748	0.0400084	Chr1D	Q43270.1 RecName: Full=Phospholipase D alpha 1; Short=PLD alpha 1; AltName: Full=Choline phosphatase 1; AltName: Full=Phosphatidylcholine-hydrolyzing phospholipase D 1 && PF12357:Phospholipase D C terminal|PF00168:C	C2
TraesCS1D03G0885700	TraesCS1D02G380800	3.1496	7.75336	3.10183	29.1346	37.3355	23.7916	4.66826	30.0872	-2.69656	6.91e-05	0.00207558	Chr1D	A2XBN5.2 RecName: Full=Non-specific lipid-transfer protein 2; Short=nsLTP2; AltName: Full=7 kDa lipid transfer protein; Flags: Precursor && PF14368:Probable lipid transfer	-
TraesCS1D03G0896600	TraesCS1D02G386800	54.593	40.982	50.6632	235.808	178.605	161.254	48.7461	191.889	-1.97549	5.2e-13	2.19e-10	Chr1D	Q08632.1 RecName: Full=Short-chain type dehydrogenase/reductase && PF13561:Enoyl-(Acyl carrier protein) reductase	-
TraesCS1D03G0919600	TraesCS1D02G395600	0	0	0	7.28365	4.03627	11.4552	0	7.59171	-5.28199	0.00168709	0.0234127	Chr1D	Q9SGN6.1 RecName: Full=MACPF domain-containing protein NSL1; AltName: Full=Protein NECROTIC SPOTTED LESIONS 1; Short=Protein NSL1 && PF01823:MAC/Perforin domain	-
TraesCS1D03G0931200	TraesCS1D02G400100	48.2939	32.1211	27.9165	263.122	324.92	116.314	36.1105	234.785	-2.69916	4.83e-14	2.67e-11	Chr1D	P20143.1 RecName: Full=Photosystem I reaction center subunit VI, chloroplastic; Short=PSI-H; AltName: Full=Light-harvesting complex I 11 kDa protein; Flags: Precursor && PF03244:Photosystem I reaction centre subunit	-
TraesCS1D03G0947400	TraesCS1D02G408300	390.55	317.888	294.674	803.022	1064.57	691.719	334.371	853.102	-1.35054	1.13e-12	4.19e-10	Chr1D	Q1XDB4.1 RecName: Full=Uncharacterized protein ycf23 (chloroplast) [Pyropia yezoensis] && PF04481:Protein of unknown function (DUF561)	-
TraesCS1D03G0951000	TraesCS1D02G409700	156.43	122.946	126.141	247.644	354.183	297.836	135.172	299.887	-1.1483	1.19e-07	1.15e-05	Chr1D	Q10VX5.1 RecName: Full=Ribosome maturation factor RimM && PF05239:PRC-barrel domain|PF01782:RimM N-terminal domain	RimM
TraesCS1D03G0954200	TraesCS1D02G411300	0	0	0	14.5673	13.1179	18.5046	0	15.3966	-6.29983	1.18e-05	0.000509252	Chr1D	P04784.1 RecName: Full=Chlorophyll a-b binding protein, chloroplastic; AltName: Full=LHCII type I CAB; Short=LHCP; Flags: Precursor && PF00504:Chlorophyll A-B binding protein	-
TraesCS1D03G0956600	TraesCS1D02G412600	72.4408	90.825	78.5796	132.016	184.659	175.353	80.6152	164.009	-1.02486	5.9e-05	0.00182193	Chr1D	Q831T9.1 RecName: Full=GTPase Era && PF01926:50S ribosome-binding GTPase|PF07650:KH domain	-
TraesCS1D03G0960400	TraesCS1D02G414900	172.178	87.5022	139.582	430.646	449.035	276.687	133.088	385.456	-1.53206	2.99e-09	4.8e-07	Chr1D	Q06036.1 RecName: Full=50S ribosomal protein L12-2, chloroplastic; AltName: Full=CL12-2; Flags: Precursor && PF00542:Ribosomal protein L7/L12 C-terminal domain|PF16320:Ribosomal protein L7/L12 dimerisation domain	-
TraesCS1D03G0971800	TraesCS1D02G421000	70.341	54.2735	52.7311	95.5979	143.288	166.541	59.1152	135.142	-1.19259	7.25e-05	0.00214465	Chr1D	Q9M9E2.1 RecName: Full=Pentatricopeptide repeat-containing protein At1g15510, chloroplastic; Flags: Precursor && PF13041:PPR repeat family|PF14432:DYW family of nucleic acid deaminases	-
TraesCS1D03G0972000	TraesCS1D02G421100	99.7373	43.1973	103.394	269.495	304.738	212.362	82.1096	262.198	-1.67153	8.51e-09	1.2e-06	Chr1D	Q7XJJ7.1 RecName: Full=Fatty acid amide hydrolase; AltName: Full=N-acylethanolamine amidohydrolase && PF01425:Amidase	Amidase
TraesCS1D03G0978200	TraesCS1D02G424500	31.496	9.9686	12.4073	163.882	130.17	76.6618	17.9573	123.571	-2.77871	1.25e-10	2.96e-08	Chr1D	-	-
TraesCS1D03G0985100	TraesCS1D02G428200	0	14.3991	4.13577	162.061	192.732	40.5338	6.17829	131.776	-4.41925	0.000884579	0.0145478	Chr1D	P27523.1 RecName: Full=Chlorophyll a-b binding protein of LHCII type III, chloroplastic; Short=CAB; Flags: Precursor && PF00504:Chlorophyll A-B binding protein	-
TraesCS1D03G0988400	TraesCS1D02G429900	0	3.32287	13.4413	32.7764	32.2902	34.3656	5.58804	33.1441	-2.5602	0.000509194	0.00963861	Chr1D	Q8VWJ2.1 RecName: Full=Probable WRKY transcription factor 28; AltName: Full=WRKY DNA-binding protein 28 && PF03106:WRKY DNA -binding domain	WRKY
TraesCS1D03G1000900	TraesCS1D02G435800	127.034	150.637	338.099	107.434	106.961	74.8995	205.257	96.4315	1.09168	0.00103429	0.0163998	Chr1D	Q9XIH7.1 RecName: Full=Putative polyol transporter 1 && PF00083:Sugar (and other) transporter	Sugar_tr
TraesCS1D03G1003100	TraesCS1D02G436700	16.7979	3.32287	24.8146	52.8064	72.6528	78.4241	14.9785	67.9611	-2.17339	1.55e-05	0.000637517	Chr1D	Q9SV26.2 RecName: Full=Pentatricopeptide repeat-containing protein At4g01030, mitochondrial; Flags: Precursor && PF14432:DYW family of nucleic acid deaminases|PF13041:PPR repeat family	-
TraesCS1D03G1003400	TraesCS1D02G437000	171.128	194.942	123.039	250.375	403.627	358.636	163.036	337.546	-1.05031	8.86e-06	0.000407191	Chr1D	Q84JF5.1 RecName: Full=Protein PLASTID TRANSCRIPTIONALLY ACTIVE 14; Short=pTAC14; AltName: Full=Plastid-encoded RNA polymerase-associated protein 7; Short=PEP-associated protein 7; Flags: Precursor && PF00856:SET do	SET
TraesCS1D03G1044400	TraesCS1D02G452700	59.8424	66.4573	42.3917	129.285	109.988	120.72	56.2305	119.998	-1.09608	0.000145645	0.00373539	Chr1D	O49545.1 RecName: Full=Leucine-rich repeat receptor-like serine/threonine-protein kinase BAM1; AltName: Full=Protein BARELY ANY MERISTEM 1; Flags: Precursor && PF00069:Protein kinase domain	Pkinase
TraesCS2A03G0053900	TraesCS2A02G026600	223.622	227.063	586.246	1515.91	1476.27	2988.05	345.643	1993.41	-2.52774	9.3e-06	0.000420519	Chr2A	Q69TI0.1 RecName: Full=Putative 12-oxophytodienoate reductase 5; AltName: Full=OPDA-reductase 5; Short=OsOPR5 && PF00724:NADH:flavin oxidoreductase / NADH oxidase family	Oxidored_FMN
TraesCS2A03G0067000	TraesCS2A02G034000	0	0	2.06789	47.3437	78.7072	3.52468	0.689295	43.1919	-5.94917	0.00105042	0.0165726	Chr2A	P80884.2 RecName: Full=Ananain; Flags: Precursor && PF00112:Papain family cysteine protease|PF08246:Cathepsin propeptide inhibitor domain (I29)	Peptidase_C1
TraesCS2A03G0067100	TraesCS2A02G034100	0	0	0	18.2091	28.2539	1.76234	0	16.0751	-6.35683	4.03e-05	0.00136042	Chr2A	-	-
TraesCS2A03G0067400	TraesCS2A02G034400	0	0	0	6.37319	23.2085	0.88117	0	10.1543	-5.6918	0.000892218	0.0146501	Chr2A	PF03018:Dirigent-like protein	-
TraesCS2A03G0071800	TraesCS2A02G037200	205.774	134.022	120.971	506.213	633.694	336.607	153.589	492.172	-1.67899	3.47e-11	9.42e-09	Chr2A	-	-
TraesCS2A03G0073200	TraesCS2A02G038000	190.026	172.789	140.616	454.317	360.237	412.388	167.81	408.981	-1.28618	3.5e-11	9.46e-09	Chr2A	PF06966:Protein of unknown function (DUF1295)	-
TraesCS2A03G0122500	TraesCS2A02G061800	4.19947	0	1.03394	70.1051	104.943	21.1481	1.74447	65.3987	-5.20934	9.98e-10	1.83e-07	Chr2A	PF01190:Pollen protein Ole e 1 like	-
TraesCS2A03G0122600	TraesCS2A02G061900	3.1496	2.21524	2.06789	110.165	129.161	18.5046	2.47758	85.9434	-5.11351	3.02e-11	8.33e-09	Chr2A	PF01190:Pollen protein Ole e 1 like	-
TraesCS2A03G0122700	TraesCS2A02G062000	1.04987	0	1.03394	79.2097	74.671	13.2176	0.694603	55.6994	-6.29875	1.05e-07	1.04e-05	Chr2A	PF01190:Pollen protein Ole e 1 like	-
TraesCS2A03G0122800	TraesCS2A02G062100	6.2992	12.1838	1.03394	146.583	170.532	22.9104	6.50566	113.342	-4.12739	0.000187374	0.0045166	Chr2A	PF01190:Pollen protein Ole e 1 like	-
TraesCS2A03G0122900	TraesCS2A02G062200	0	0	2.06789	76.4783	60.544	7.93053	0.689295	48.3176	-6.09694	6.87e-07	4.99e-05	Chr2A	PF01190:Pollen protein Ole e 1 like	-
TraesCS2A03G0123800	TraesCS2A02G062600	0	5.53811	2.06789	117.449	134.206	12.3364	2.53533	87.997	-5.12553	0.000183748	0.00445447	Chr2A	PF01190:Pollen protein Ole e 1 like	-
TraesCS2A03G0124100	TraesCS2A02G062800	3.1496	0	4.13577	88.3142	95.8614	21.1481	2.42846	68.4412	-4.79406	4.72e-10	9.48e-08	Chr2A	PF01190:Pollen protein Ole e 1 like	-
TraesCS2A03G0124200	TraesCS2A02G062900	0	0	0	28.2241	30.272	2.64351	0	20.3799	-6.70032	6.58e-06	0.000319994	Chr2A	PF01190:Pollen protein Ole e 1 like	-
TraesCS2A03G0124400	TraesCS2A02G063000	3.1496	7.75336	3.10183	72.8365	82.7435	23.7916	4.66826	59.7905	-3.68766	1.12e-08	1.52e-06	Chr2A	PF01190:Pollen protein Ole e 1 like	-
TraesCS2A03G0131600	TraesCS2A02G066700	0	2.21524	0	26.4032	56.5078	7.04936	0.738415	29.9868	-5.3866	2.08e-05	0.000802825	Chr2A	P00871.2 RecName: Full=Ribulose bisphosphate carboxylase small chain PWS4.3, chloroplastic; Short=RuBisCO small subunit PWS4.3; Flags: Precursor && PF00101:Ribulose bisphosphate carboxylase, small chain|PF12338:Ribu	-
TraesCS2A03G0131700	TraesCS2A02G066800	2.09973	0	0	30.045	64.5803	1.76234	0.699911	32.1292	-5.51151	0.00445589	0.0463635	Chr2A	P26667.1 RecName: Full=Ribulose bisphosphate carboxylase small chain PW9, chloroplastic; Short=RuBisCO small subunit PW9; Flags: Precursor && PF00101:Ribulose bisphosphate carboxylase, small chain|PF12338:Ribulose-1	-
TraesCS2A03G0132100	TraesCS2A02G067200	0	1.10762	0	10.9255	24.2176	1.76234	0.369207	12.3018	-5.00742	0.00152806	0.021769	Chr2A	P26667.1 RecName: Full=Ribulose bisphosphate carboxylase small chain PW9, chloroplastic; Short=RuBisCO small subunit PW9; Flags: Precursor && PF00101:Ribulose bisphosphate carboxylase, small chain|PF12338:Ribulose-1	-
TraesCS2A03G0132200	TraesCS2A02G067300	12.5984	15.5067	13.4413	107.434	155.396	56.3949	13.8488	106.408	-2.94073	2.84e-11	7.88e-09	Chr2A	P26667.1 RecName: Full=Ribulose bisphosphate carboxylase small chain PW9, chloroplastic; Short=RuBisCO small subunit PW9; Flags: Precursor && PF00101:Ribulose bisphosphate carboxylase, small chain|PF12338:Ribulose-1	-
TraesCS2A03G0142600	TraesCS2A02G073500	9.4488	17.722	16.5431	41.881	29.263	44.9397	14.5713	38.6945	-1.41292	0.00471452	0.0481639	Chr2A	Q9SYK9.1 RecName: Full=UDP-glycosyltransferase 74E2 && PF00201:UDP-glucoronosyl and UDP-glucosyl transferase	UDPGT
TraesCS2A03G0165100	TraesCS2A02G084800	35.6955	59.8116	74.4439	126.553	145.306	148.918	56.6503	140.259	-1.30762	1.39e-05	0.000583121	Chr2A	P48619.1 RecName: Full=Omega-3 fatty acid desaturase, chloroplastic; Flags: Precursor && PF00487:Fatty acid desaturase|PF11960:Domain of unknown function (DUF3474)	-
TraesCS2A03G0225000	TraesCS2A02G109500	13.6483	18.8296	14.4752	42.7914	61.5531	31.7221	15.651	45.3555	-1.53382	0.00137953	0.0202189	Chr2A	PF00578:AhpC/TSA family	-
TraesCS2A03G0229800	TraesCS2A02G111300	118.635	96.3632	92.0209	468.885	539.851	333.082	102.34	447.273	-2.12667	4.8e-21	7.61e-18	Chr2A	PF06596:Photosystem II reaction centre X protein (PsbX)	-
TraesCS2A03G0230600	TraesCS2A02G111500	172.178	179.435	138.548	254.928	363.264	379.784	163.387	332.659	-1.0262	2.18e-06	0.000129464	Chr2A	F4I0K2.2 RecName: Full=Fructokinase-like 2, chloroplastic; AltName: Full=pfkB-type carbohydrate kinase family protein 1; Flags: Precursor && PF00294:pfkB family carbohydrate kinase	PfkB
TraesCS2A03G0234900	TraesCS2A02G114000	241.469	94.1479	82.7154	366.914	357.21	303.123	139.444	342.415	-1.29532	3.33e-05	0.00117165	Chr2A	Q9SW70.1 RecName: Full=Stress-related protein && PF05755:Rubber elongation factor protein (REF)	-
TraesCS2A03G0235700	TraesCS2A02G114400	12.5984	26.5829	17.577	122.912	138.242	34.3656	18.9195	98.5065	-2.38159	1.11e-06	7.42e-05	Chr2A	P31093.1 RecName: Full=Photosystem I reaction center subunit N, chloroplastic; Short=PSI-N; Flags: Precursor && PF05479:Photosystem I reaction centre subunit N (PSAN or PSI-N)	-
TraesCS2A03G0251500	TraesCS2A02G121900	11.5485	18.8296	12.4073	74.6574	32.2902	94.2852	14.2618	67.0776	-2.24021	4.87e-06	0.00025183	Chr2A	Q9FIG6.1 RecName: Full=Dirigent protein 1; Short=AtDIR1; Flags: Precursor && PF03018:Dirigent-like protein	-
TraesCS2A03G0274100	TraesCS2A02G134000	29.3963	31.0134	62.0366	220.33	341.065	201.788	40.8154	254.394	-2.63552	7.6e-17	6.79e-14	Chr2A	B8ANF1.1 RecName: Full=Magnesium-chelatase subunit ChlH, chloroplastic; Short=Mg-chelatase subunit H; AltName: Full=Mg-protoporphyrin IX chelatase subunit ChlH; Flags: Precursor && PF11965:Domain of unknown function	-
TraesCS2A03G0314100	TraesCS2A02G152400	12.5984	3.32287	9.30548	25.4928	20.1813	47.5832	8.40892	31.0858	-1.88337	0.00320839	0.0369203	Chr2A	F4IK45.1 RecName: Full=Cytochrome P450 709B2 && PF00067:Cytochrome P450	p450
TraesCS2A03G0314400	TraesCS2A02G152700	27.2965	31.0134	27.9165	60.0901	61.5531	66.0878	28.7421	62.577	-1.12354	0.00205756	0.0267807	Chr2A	Q8LPH6.1 RecName: Full=Transcription factor MYB86; AltName: Full=Myb homolog 4; Short=AtMyb4; AltName: Full=Myb-related protein 86; Short=AtMYB86 && PF00249:Myb-like DNA-binding domain	Myb_DNA-binding
TraesCS2A03G0320500	TraesCS2A02G156100	1749.08	1194.02	1216.95	3250.33	4718.4	3964.38	1386.68	3977.7	-1.52011	6.46e-18	6.63e-15	Chr2A	Q08935.1 RecName: Full=29 kDa ribonucleoprotein A, chloroplastic; AltName: Full=CP29A; Flags: Precursor && PF00076:RNA recognition motif. (a.k.a. RRM, RBD, or RNP domain)	RRM_1
TraesCS2A03G0321700	TraesCS2A02G156800	16.7979	9.9686	2.06789	87.4038	43.3899	12.3364	9.61145	47.71	-2.31289	0.000995178	0.0159098	Chr2A	Q9SNB6.1 RecName: Full=E3 ubiquitin-protein ligase RDUF1; AltName: Full=RING and DUF1117 domain-containing protein 1; Short=AtRDUF1 && PF13639:Ring finger domain	-
TraesCS2A03G0380600	TraesCS2A02G183100	24.1469	19.9372	39.2898	56.4483	96.8705	62.5631	27.7913	71.9606	-1.36713	0.000704901	0.0122768	Chr2A	PF11282:Protein of unknown function (DUF3082)	-
TraesCS2A03G0388400	TraesCS2A02G187200	5.24933	7.75336	14.4752	104.702	197.777	29.0786	9.1593	110.519	-3.58748	7.8e-10	1.47e-07	Chr2A	P10708.1 RecName: Full=Chlorophyll a-b binding protein 7, chloroplastic; AltName: Full=LHCI type II CAB-7; Flags: Precursor && PF00504:Chlorophyll A-B binding protein	-
TraesCS2A03G0395300	TraesCS2A02G189600	65.0917	96.3632	124.073	112.897	141.269	344.538	95.176	199.568	-1.06929	0.00354789	0.0396558	Chr2A	Q8GVE1.1 RecName: Full=Chitin-inducible gibberellin-responsive protein 2 && PF03514:GRAS domain family	GRAS
TraesCS2A03G0404400	TraesCS2A02G194500	241.469	225.955	233.671	380.571	442.981	615.057	233.698	479.536	-1.03743	2.84e-07	2.39e-05	Chr2A	Q9FN11.1 RecName: Full=LOB domain-containing protein 37; AltName: Full=ASYMMETRIC LEAVES 2-like protein 39; Short=AS2-like protein 39 && PF03195:Lateral organ boundaries (LOB) domain	-
TraesCS2A03G0423300	TraesCS2A02G202100	34.6456	15.5067	32.0522	274.958	340.056	127.77	27.4015	247.594	-3.17026	8.68e-18	8.52e-15	Chr2A	-	-
TraesCS2A03G0423600	TraesCS2A02G202300	33.5957	26.5829	26.8825	80.1201	92.8342	49.3455	29.0204	74.0999	-1.34949	0.00042511	0.00835542	Chr2A	P82869.3 RecName: Full=Peptidyl-prolyl cis-trans isomerase CYP37, chloroplastic; Short=PPIase CYP37; AltName: Full=Rotamase CYP37; AltName: Full=Thylakoid lumen PPIase of 38 kDa; Short=TLP38; Short=p38; Flags: Precu	Pro_isomerase
TraesCS2A03G0430100	TraesCS2A02G204800	0	0	4.13577	50.0751	37.3355	20.2669	1.37859	35.8925	-4.67163	7.64e-07	5.42e-05	Chr2A	P27523.1 RecName: Full=Chlorophyll a-b binding protein of LHCII type III, chloroplastic; Short=CAB; Flags: Precursor && PF00504:Chlorophyll A-B binding protein	-
TraesCS2A03G0431900	TraesCS2A02G205500	0	0	0	119.27	76.6891	177.996	0	124.652	-9.3177	4.6e-14	2.58e-11	Chr2A	Q41144.1 RecName: Full=Sugar carrier protein C && PF00083:Sugar (and other) transporter	Sugar_tr
TraesCS2A03G0432400	TraesCS2A02G205600	0	0	0	21.8509	14.1269	10.574	0	15.5173	-6.30984	1.3e-05	0.000551331	Chr2A	PF07893:Protein of unknown function (DUF1668)	-
TraesCS2A03G0432800	TraesCS2A02G205700	0	0	0	102.881	105.952	96.9287	0	101.921	-9.02508	1.67e-13	8.36e-11	Chr2A	PF06764:Protein of unknown function (DUF1223)	-
TraesCS2A03G0433100	TraesCS2A02G205900	0	0	0	16.3882	20.1813	2.64351	0	13.071	-6.05875	0.000100929	0.0028187	Chr2A	-	-
TraesCS2A03G0433300	TraesCS2A02G206000	1.04987	2.21524	2.06789	561.751	557.005	486.406	1.77767	535.054	-8.23817	1.02e-34	4.43e-31	Chr2A	Q8VYN2.1 RecName: Full=Vesicle-associated protein 4-2; AltName: Full=Plant VAP homolog 4-2; Short=AtPVA42; AltName: Full=VAMP-associated protein 4-2 && PF00635:MSP (Major sperm protein) domain	Motile_Sperm
TraesCS2A03G0433600	TraesCS2A02G206100	2.09973	4.43049	0	568.124	613.513	418.556	2.17674	533.398	-7.96853	2.57e-37	1.38e-33	Chr2A	Q84PB7.1 RecName: Full=Protein THYLAKOID FORMATION1, chloroplastic; Flags: Precursor && PF11264:Thylakoid formation protein	-
TraesCS2A03G0433700	TraesCS2A02G206200	0	0	0	138.389	271.439	116.314	0	175.381	-9.8065	1.48e-15	1.11e-12	Chr2A	Q07473.1 RecName: Full=Chlorophyll a-b binding protein CP29.1, chloroplastic; AltName: Full=LHCB4.1; AltName: Full=LHCII protein 4.1; Flags: Precursor && PF00504:Chlorophyll A-B binding protein	-
TraesCS2A03G0433900	TraesCS2A02G206300	0	0	0	39.1496	44.399	34.3656	0	39.3047	-7.64973	2.87e-09	4.66e-07	Chr2A	Q9M0Y6.1 RecName: Full=Putative PAP-specific phosphatase, mitochondrial; AltName: Full=3'(2'),5'-bisphosphate nucleotidase; AltName: Full=3'(2'),5-bisphosphonucleoside 3'(2')-phosphohydrolase; AltName: Full=DPNPase;	-
TraesCS2A03G0434100	TraesCS2A02G206500	0	0	0	7.28365	15.136	1.76234	0	8.06067	-5.35945	0.00182032	0.0246545	Chr2A	Q5N9X2.1 RecName: Full=Laccase-4; AltName: Full=Benzenediol:oxygen oxidoreductase 4; AltName: Full=Diphenol oxidase 4; AltName: Full=Urishiol oxidase 4; Flags: Precursor && PF07731:Multicopper oxidase|PF00394:Multic	-
TraesCS2A03G0434500	TraesCS2A02G206600	0	0	0	8.1941	7.06347	19.3857	0	11.5478	-5.88681	0.000134979	0.00352933	Chr2A	Q55G83.1 RecName: Full=Probable serine/threonine-protein kinase abkC && PF03109:ABC1 family	ABC1
TraesCS2A03G0460300	TraesCS2A02G215000	300.262	260.291	275.029	803.932	933.387	516.366	278.527	751.228	-1.43053	5.4e-12	1.74e-09	Chr2A	Q0D5P8.1 RecName: Full=Oxygen-evolving enhancer protein 3, chloroplastic; Short=OEE3; AltName: Full=LP02; Flags: Precursor >P83646.2 RecName: Full=Oxygen-evolving enhancer protein 3, chloroplastic; Short=OEE3; AltNa	-
TraesCS2A03G0467200	TraesCS2A02G218700	2.09973	2.21524	0	51.896	26.2357	24.6728	1.43833	34.2682	-4.59157	6.78e-07	4.94e-05	Chr2A	Q06398.2 RecName: Full=Probable glutathione S-transferase GSTU6; AltName: Full=28 kDa cold-induced protein && PF13410:Glutathione S-transferase, C-terminal domain|PF13417:Glutathione S-transferase, N-terminal domain	-
TraesCS2A03G0473200	TraesCS2A02G221000	194.225	130.699	98.2246	416.989	589.295	359.517	141.05	455.267	-1.68971	3.19e-11	8.74e-09	Chr2A	A2YLX7.1 RecName: Full=Protein LHCP TRANSLOCATION DEFECT; Flags: Precursor >A3BKF2.1 RecName: Full=Protein LHCP TRANSLOCATION DEFECT; Flags: Precursor && -	-
TraesCS2A03G0588700	TraesCS2A02G247300	613.122	584.825	556.261	1443.98	1967.68	932.278	584.736	1447.98	-1.30773	7.51e-10	1.43e-07	Chr2A	P27665.1 RecName: Full=Oxygen-evolving enhancer protein 1, chloroplastic; Short=OEE1; AltName: Full=33 kDa subunit of oxygen evolving system of photosystem II; AltName: Full=33 kDa thylakoid membrane protein; AltNam	-
TraesCS2A03G0597500	TraesCS2A02G248600	16.7979	18.8296	16.5431	61.0005	35.3174	42.2962	17.3902	46.2047	-1.4123	0.00199993	0.026267	Chr2A	PF13671:AAA domain	-
TraesCS2A03G0600700	TraesCS2A02G249600	212.073	156.175	223.332	422.451	608.468	495.218	197.193	508.712	-1.36548	1.88e-11	5.42e-09	Chr2A	Q39061.1 RecName: Full=RNA-binding protein CP33, chloroplastic; AltName: Full=Protein PIGMENT DEFECTIVE 322; Flags: Precursor && PF00076:RNA recognition motif. (a.k.a. RRM, RBD, or RNP domain)	RRM_1
TraesCS2A03G0608500	TraesCS2A02G252600	8.39893	12.1838	5.16971	82.8515	133.197	45.8208	8.58416	87.2897	-3.35026	7.93e-11	1.96e-08	Chr2A	P36886.1 RecName: Full=Photosystem I reaction center subunit psaK, chloroplastic; AltName: Full=Light-harvesting complex I 7 kDa protein; AltName: Full=PSI-K; AltName: Full=Photosystem I subunit X; Flags: Precursor	-
TraesCS2A03G0613800	TraesCS2A02G254600	469.29	311.242	340.167	929.575	1200.79	650.304	373.566	926.89	-1.31016	2.39e-09	3.93e-07	Chr2A	Q00434.1 RecName: Full=Oxygen-evolving enhancer protein 2, chloroplastic; Short=OEE2; AltName: Full=23 kDa subunit of oxygen evolving system of photosystem II; AltName: Full=23 kDa thylakoid membrane protein; AltNam	-
TraesCS2A03G0638900	TraesCS2A02G259500	3.1496	17.722	17.577	58.2692	44.399	73.1371	12.8162	58.6017	-2.19716	2.41e-05	0.000912089	Chr2A	P23586.2 RecName: Full=Sugar transport protein 1; AltName: Full=Glucose transporter; AltName: Full=Hexose transporter 1 && PF00083:Sugar (and other) transporter	Sugar_tr
TraesCS2A03G0665300	TraesCS2A02G270200	35.6955	28.7982	36.188	61.0005	63.5712	110.146	33.5605	78.2393	-1.22197	0.00106634	0.0167481	Chr2A	Q0JEE2.1 RecName: Full=WRKY transcription factor WRKY51; Short=OsWRKY51 && PF10533:Plant zinc cluster domain|PF03106:WRKY DNA -binding domain	WRKY
TraesCS2A03G0672700	TraesCS2A02G271700	0	3.32287	6.20366	10.9255	10.0907	68.7313	3.17551	29.9158	-3.23682	0.00055195	0.0102504	Chr2A	Q2HIV9.1 RecName: Full=Transcription factor bHLH35; AltName: Full=Basic helix-loop-helix protein 35; Short=AtbHLH35; Short=bHLH 35; AltName: Full=Transcription factor EN 41; AltName: Full=bHLH transcription factor b	HLH
TraesCS2A03G0675400	TraesCS2A02G272500	28.3464	11.0762	36.188	78.2992	62.5622	47.5832	25.2035	62.8149	-1.31234	0.00323613	0.0371703	Chr2A	O23342.1 RecName: Full=Preprotein translocase subunit SECE1; Flags: Precursor && -	-
TraesCS2A03G0678600	TraesCS2A02G274000	14.6981	4.43049	0	25.4928	32.2902	29.0786	6.37621	28.9538	-2.18224	0.00397636	0.0430071	Chr2A	P37890.1 RecName: Full=Serine carboxypeptidase 1; AltName: Full=Carboxypeptidase C; AltName: Full=Serine carboxypeptidase I; Contains: RecName: Full=Serine carboxypeptidase 1 chain A; AltName: Full=Serine carboxypep	Peptidase_S10
TraesCS2A03G0699100	TraesCS2A02G280500	22.0472	16.6143	17.577	43.7019	58.5259	36.128	18.7462	46.1186	-1.29519	0.00386941	0.0422076	Chr2A	Q9SM43.2 RecName: Full=Violaxanthin de-epoxidase, chloroplastic; Flags: Precursor && PF07137:VDE lipocalin domain	-
TraesCS2A03G0718500	TraesCS2A02G287700	50.3936	47.6278	43.4256	95.5979	94.8523	110.146	47.149	100.199	-1.08853	0.000243249	0.0055175	Chr2A	Q9FGN8.2 RecName: Full=Protein DYAD; AltName: Full=Protein SWITCH 1 && -	-
TraesCS2A03G0729600	TraesCS2A02G291900	59.8424	64.2421	75.4778	157.509	184.659	151.561	66.5208	164.576	-1.30529	2.69e-07	2.29e-05	Chr2A	Q9SGD6.1 RecName: Full=Arogenate dehydratase/prephenate dehydratase 6, chloroplastic; Short=AtADT6; Short=AtPDT6; Flags: Precursor && PF00800:Prephenate dehydratase	-
TraesCS2A03G0730800	TraesCS2A02G292600	10.4987	15.5067	12.4073	50.0751	54.4896	16.7422	12.8042	40.4356	-1.65774	0.00315414	0.0364223	Chr2A	PF04949:Transcriptional activator	-
TraesCS2A03G0738500	TraesCS2A02G296400	0	4.43049	0	38.2391	62.5622	15.8611	1.47683	38.8875	-4.75856	7.78e-07	5.5e-05	Chr2A	Q949Q5.1 RecName: Full=Photosystem I subunit O; Short=PSI-O; Flags: Precursor && -	-
TraesCS2A03G0740500	TraesCS2A02G297300	41.9947	27.6906	23.7807	67.3737	79.7163	65.2066	31.1553	70.7655	-1.18207	0.00137512	0.0201713	Chr2A	PF06916:Protein of unknown function (DUF1279)	-
TraesCS2A03G0742500	TraesCS2A02G298000	35.6955	27.6906	35.1541	75.5678	86.7798	68.7313	32.8467	77.0263	-1.22676	0.000364043	0.00742513	Chr2A	Q9SVC6.1 RecName: Full=E3 ubiquitin-protein ligase PUB22; AltName: Full=Plant U-box protein 22; AltName: Full=U-box domain-containing protein 22 && PF04564:U-box domain	U-box
TraesCS2A03G0751200	TraesCS2A02G302000	83.9893	43.1973	69.2742	122.001	169.523	167.422	65.4869	152.982	-1.22145	3.44e-05	0.00120221	Chr2A	Q9BUL9.1 RecName: Full=Ribonuclease P protein subunit p25; Short=RNase P protein subunit p25 && PF01918:Alba	-
TraesCS2A03G0752100	TraesCS2A02G302300	100.787	127.377	64.1045	313.197	237.131	393.883	97.4227	314.737	-1.69487	2.66e-10	5.84e-08	Chr2A	Q339N5.2 RecName: Full=Cellulose synthase-like protein H1; AltName: Full=OsCslH1 && PF03552:Cellulose synthase	-
TraesCS2A03G0755700	TraesCS2A02G303600	60.8922	35.4439	55.8329	100.15	86.7798	125.126	50.723	104.019	-1.0354	0.00118833	0.0181133	Chr2A	Q9CAQ2.2 RecName: Full=Acetyltransferase At1g77540; AltName: Full=Minimal acetyltransferase && PF14542:GCN5-related N-acetyl-transferase	-
TraesCS2A03G0765800	TraesCS2A02G307300	109.186	115.193	86.8512	194.838	256.303	210.6	103.743	220.58	-1.08823	2.42e-06	0.000140724	Chr2A	-	-
TraesCS2A03G0775000	TraesCS2A02G311700	30.4461	53.1659	35.1541	84.6724	97.8795	91.6417	39.5887	91.3979	-1.20954	0.000274408	0.00603084	Chr2A	Q9C667.1 RecName: Full=Chaperonin 60 subunit beta 4, chloroplastic; Short=CPN-60 beta 4; Flags: Precursor && PF00118:TCP-1/cpn60 chaperonin family	-
TraesCS2A03G0800200	TraesCS2A02G342600	51.4435	23.2601	33.0862	239.45	346.11	163.898	35.9299	249.819	-2.7935	3.98e-17	3.81e-14	Chr2A	P27525.1 RecName: Full=Chlorophyll a-b binding protein CP24 10B, chloroplastic; Short=CAB-10B; Short=LHCP; Flags: Precursor && PF00504:Chlorophyll A-B binding protein	-
TraesCS2A03G0804000	TraesCS2A02G344600	230.971	220.417	296.742	901.351	1195.74	388.596	249.376	828.564	-1.73196	0.000262293	0.00584377	Chr2A	P09315.1 RecName: Full=Glyceraldehyde-3-phosphate dehydrogenase A, chloroplastic; AltName: Full=NADP-dependent glyceraldehydephosphate dehydrogenase subunit A; Flags: Precursor && PF00044:Glyceraldehyde 3-phosphate	-
TraesCS2A03G0835500	TraesCS2A02G323300	17.8477	11.0762	22.7467	61.0005	52.4715	49.3455	17.2236	54.2725	-1.65148	0.000173354	0.00425214	Chr2A	Q7XUP7.2 RecName: Full=Peptide methionine sulfoxide reductase A2-1; Short=OsMSRA2.1; AltName: Full=Peptide-methionine (S)-S-oxide reductase; Short=Peptide Met(O) reductase; AltName: Full=Protein-methionine-S-oxide r	PMSR
TraesCS2A03G0835700	TraesCS2A02G323200	29.3963	32.1211	26.8825	86.4933	109.988	246.728	29.4666	147.736	-2.32824	3.07e-09	4.91e-07	Chr2A	Q94BN0.1 RecName: Full=BTB/POZ and TAZ domain-containing protein 2; AltName: Full=BTB and TAZ domain protein 2 && PF02135:TAZ zinc finger|PF00651:BTB/POZ domain	BTB
TraesCS2A03G0857600	TraesCS2A02G350800	0	0	0	30.045	2.01813	18.5046	0	16.8559	-6.43279	2.66e-05	0.000984654	Chr2A	O04138.2 RecName: Full=Chitinase 4; AltName: Full=OsChia2b; AltName: Full=Pathogenesis related (PR)-3 chitinase 4; Flags: Precursor && PF00187:Chitin recognition protein|PF00182:Chitinase class I	-
TraesCS2A03G0862600	TraesCS2A02G353000	32.5459	24.3677	28.9504	8.1941	6.0544	9.69287	28.6213	7.98046	1.83703	0.00168338	0.0233746	Chr2A	Q5ZK33.1 RecName: Full=LETM1 and EF-hand domain-containing protein 1, mitochondrial; AltName: Full=Leucine zipper-EF-hand-containing transmembrane protein 1; Flags: Precursor && PF07766:LETM1-like protein	-
TraesCS2A03G0870100	TraesCS2A02G355600	0	3.32287	0	9.10456	14.1269	16.7422	1.10762	13.3246	-3.62719	0.00282504	0.03363	Chr2A	O49292.2 RecName: Full=PsbP domain-containing protein 4, chloroplastic; AltName: Full=OEC23-like protein 5; Flags: Precursor && PF01789:PsbP	-
TraesCS2A03G0870300	TraesCS2A02G355800	6.2992	3.32287	7.2376	34.5973	37.3355	29.0786	5.61989	33.6705	-2.57509	2.97e-05	0.00107037	Chr2A	Q9SZH2.2 RecName: Full=Peroxidase 43; Short=Atperox P43; Flags: Precursor && PF00141:Peroxidase	-
TraesCS2A03G0873000	TraesCS2A02G357100	0	0	0	1.82091	7.06347	17.6234	0	8.83593	-5.49982	0.00117583	0.0179857	Chr2A	Q9SSD1.1 RecName: Full=Protein TOO MANY MOUTHS; AltName: Full=Receptor-like protein 17; Short=AtRLP17; Flags: Precursor && PF13855:Leucine rich repeat	-
TraesCS2A03G0876300	TraesCS2A02G359300	16.7979	15.5067	21.7128	56.4483	50.4534	38.7715	18.0058	48.5577	-1.42857	0.00122138	0.0185079	Chr2A	Q8W3M4.1 RecName: Full=Uncharacterized protein At4g06744; Flags: Precursor && -	-
TraesCS2A03G0904100	TraesCS2A02G371600	15.748	38.7668	14.4752	50.0751	55.4987	125.126	22.9967	76.9	-1.74863	0.000283982	0.00620021	Chr2A	O80939.1 RecName: Full=L-type lectin-domain containing receptor kinase IV.1; Short=Arabidopsis thaliana lectin-receptor kinase e; Short=AthlecRK-e; Short=LecRK-IV.1; AltName: Full=Lectin Receptor Kinase 1; Flags: Pr	Pkinase
TraesCS2A03G0922900	TraesCS2A02G381100	29.3963	26.5829	12.4073	40.0601	25.2267	148.918	22.7955	71.4015	-1.65153	0.0039246	0.042623	Chr2A	Q43210.1 RecName: Full=Phenylalanine ammonia-lyase && PF00221:Aromatic amino acid lyase	-
TraesCS2A03G0930200	TraesCS2A02G384200	8.39893	22.1524	15.5091	49.1646	87.7889	46.702	15.3535	61.2185	-1.99669	2.96e-05	0.00106763	Chr2A	PF01471:Putative peptidoglycan binding domain	PG_binding_1
TraesCS2A03G0954300	TraesCS2A02G396200	0	2.21524	4.13577	33.6869	36.3264	42.2962	2.11701	37.4365	-4.14047	1.55e-07	1.44e-05	Chr2A	B3SGL0.1 RecName: Full=Beta-carotene 3-hydroxylase, chloroplastic; Short=GenCHYB; Flags: Precursor && PF04116:Fatty acid hydroxylase superfamily	-
TraesCS2A03G0989900	TraesCS2A02G412600	116.535	115.193	88.9191	267.674	411.699	519.009	106.882	399.461	-1.90286	3.07e-14	1.8e-11	Chr2A	Q8LPF3.1 RecName: Full=Probable pectinesterase 68; Short=PE 68; AltName: Full=Pectin methylesterase 68; Short=AtPME68; Flags: Precursor && PF01095:Pectinesterase	-
TraesCS2A03G0996900	TraesCS2A02G416300	2.09973	0	0	15.4777	12.1088	10.574	0.699911	12.7202	-4.17034	0.00196431	0.0259728	Chr2A	P59259.2 RecName: Full=Histone H4 >Q6LAF3.3 RecName: Full=Histone H4 >Q6PMI5.3 RecName: Full=Histone H4 >Q6WZ83.3 RecName: Full=Histone H4 >Q76H85.3 RecName: Full=Histone H4 >P62788.2 RecName: Full=Histone H4 >P6278	-
TraesCS2A03G0999600	TraesCS2A02G417600	4.19947	1.10762	0	30.045	39.3536	55.5137	1.76903	41.6375	-4.55606	4.93e-08	5.53e-06	Chr2A	P59259.2 RecName: Full=Histone H4 >Q6LAF3.3 RecName: Full=Histone H4 >Q6PMI5.3 RecName: Full=Histone H4 >Q6WZ83.3 RecName: Full=Histone H4 >Q76H85.3 RecName: Full=Histone H4 >P62788.2 RecName: Full=Histone H4 >P6278	-
TraesCS2A03G1025400	TraesCS2A02G430400	13.6483	13.2915	3.10183	53.7169	20.1813	43.1773	10.0139	39.0252	-1.96981	0.00123131	0.0186178	Chr2A	Q9SGU2.1 RecName: Full=Auxin-responsive protein SAUR71; AltName: Full=Protein SMALL AUXIN UP RNA 71 && PF02519:Auxin responsive protein	Auxin_inducible
TraesCS2A03G1026700	TraesCS2A02G431000	56.6928	49.843	31.0183	104.702	131.179	117.196	45.8514	117.692	-1.36062	1.27e-05	0.000540157	Chr2A	Q941D3.1 RecName: Full=Probable plastid-lipid-associated protein 8, chloroplastic; AltName: Full=Fibrillin-6; Flags: Precursor && PF04755:PAP_fibrillin	-
TraesCS2A03G1039800	TraesCS2A02G437600	269.816	165.036	217.128	408.795	585.259	454.684	217.326	482.912	-1.1503	7.63e-08	7.91e-06	Chr2A	Q9C7Y2.1 RecName: Full=Multiple organellar RNA editing factor 5, mitochondrial; AltName: Full=RNA editing-interacting protein 5; Flags: Precursor && -	-
TraesCS2A03G1039900	TraesCS2A02G437700	10.4987	9.9686	15.5091	96.5083	106.961	45.8208	11.9921	83.0968	-2.78769	1.98e-09	3.33e-07	Chr2A	Q9THX6.1 RecName: Full=Thylakoid lumenal 29 kDa protein, chloroplastic; Short=TL29; AltName: Full=LeAPx09; AltName: Full=P29; Flags: Precursor && PF00141:Peroxidase	-
TraesCS2A03G1043400	TraesCS2A02G439400	29.3963	56.4887	61.0026	67.3737	124.115	118.958	48.9625	103.482	-1.07931	0.00270221	0.0325583	Chr2A	Q39219.2 RecName: Full=Ubiquinol oxidase 1a, mitochondrial; AltName: Full=Alternative oxidase 1a; Flags: Precursor && PF01786:Alternative oxidase	AOX
TraesCS2A03G1061900	TraesCS2A02G448400	50.3936	55.3811	59.9687	128.374	168.514	148.037	55.2478	148.308	-1.42348	1.23e-07	1.17e-05	Chr2A	P19684.1 RecName: Full=33 kDa ribonucleoprotein, chloroplastic; Flags: Precursor && PF00076:RNA recognition motif. (a.k.a. RRM, RBD, or RNP domain)	RRM_1
TraesCS2A03G1086400	TraesCS2A02G460700	1.04987	7.75336	18.611	26.4032	24.2176	66.9689	9.13806	39.1966	-2.09976	0.0026391	0.0320146	Chr2A	Q53QI0.1 RecName: Full=B3 domain-containing protein Os11g0156000 && PF02362:B3 DNA binding domain	B3
TraesCS2A03G1099400	TraesCS2A02G467100	48.2939	34.3363	44.4595	103.792	108.979	66.9689	42.3632	93.2467	-1.13501	0.000718138	0.0124638	Chr2A	PF00170:bZIP transcription factor	bZIP_1
TraesCS2A03G1099900	TraesCS2A02G467400	10.4987	19.9372	19.6449	0.910456	0	2.64351	16.6936	1.18466	3.77203	0.000392609	0.007881	Chr2A	Q9SND9.1 RecName: Full=Uncharacterized acetyltransferase At3g50280 && PF02458:Transferase family	-
TraesCS2A03G1117000	TraesCS2A02G476500	0	1.10762	0	14.5673	1.00907	29.0786	0.369207	14.885	-5.29284	0.000740356	0.0127321	Chr2A	Q05736.1 RecName: Full=Pathogenesis-related protein 1; Short=AOPR1 && PF00407:Pathogenesis-related protein Bet v 1 family	-
TraesCS2A03G1121000	TraesCS2A02G478500	0	1.10762	8.27154	18.2091	40.3627	14.0987	3.12639	24.2235	-2.93726	0.00115772	0.0177832	Chr2A	A7LXU3.1 RecName: Full=Beta-glucosidase BoGH3B; AltName: Full=Glycosyl hydrolase family protein 3B; Short=BoGH3B; Flags: Precursor && PF00933:Glycosyl hydrolase family 3 N terminal domain|PF01915:Glycosyl hydrolase	Glyco_hydro_3
TraesCS2A03G1131000	TraesCS2A02G484100	370.603	392.098	293.64	527.154	614.522	1001.89	352.114	714.522	-1.02176	5.13e-06	0.000261357	Chr2A	Q8LDW9.2 RecName: Full=Xyloglucan endotransglucosylase/hydrolase protein 9; Short=At-XTH9; Short=XTH-9; Flags: Precursor && PF06955:Xyloglucan endo-transglycosylase (XET) C-terminus	-
TraesCS2A03G1176900	TraesCS2A02G505700	0	0	0	50.9855	3.0272	52.8702	0	35.6276	-7.50967	0.000243165	0.0055175	Chr2A	P31164.1 RecName: Full=50S ribosomal protein L11, chloroplastic; AltName: Full=CL11; Flags: Precursor && -	-
TraesCS2A03G1188300	TraesCS2A02G510800	2.09973	8.86098	15.5091	18.2091	28.2539	96.9287	8.82328	47.7972	-2.43827	0.000482361	0.00924613	Chr2A	Q8GXG1.2 RecName: Full=Probable isoaspartyl peptidase/L-asparaginase 2; AltName: Full=L-asparagine amidohydrolase 2; Contains: RecName: Full=Isoaspartyl peptidase/L-asparaginase 2 subunit alpha; Contains: RecName: F	Asparaginase_2
TraesCS2A03G1188800	TraesCS2A02G511300	6.2992	2.21524	5.16971	23.6718	31.2811	33.4845	4.56139	29.4791	-2.68434	6.98e-05	0.00208421	Chr2A	Q9C9B0.2 RecName: Full=UDP-glycosyltransferase 89B1; AltName: Full=Flavonol 3-O-glucosyltransferase UGT89B1; AltName: Full=Flavonol 7-O-glucosyltransferase UGT89B1 && PF00201:UDP-glucoronosyl and UDP-glucosyl transf	UDPGT
TraesCS2A03G1195300	TraesCS2A02G513900	38.8451	40.982	24.8146	144.762	117.052	44.9397	34.8806	102.251	-1.55185	0.00020765	0.00488546	Chr2A	-	-
TraesCS2A03G1196100	TraesCS2A02G514200	50.3936	53.1659	63.0705	133.837	107.97	118.958	55.5433	120.255	-1.11453	6.95e-05	0.00208088	Chr2A	P47927.1 RecName: Full=Floral homeotic protein APETALA 2 && PF00847:AP2 domain	AP2
TraesCS2A03G1201700	TraesCS2A02G517100	300.262	352.224	322.59	582.692	872.843	713.748	325.025	723.094	-1.15331	1.48e-10	3.45e-08	Chr2A	F4JKH6.1 RecName: Full=Protein TSS; AltName: Full=TPR-domain suppressor of STIMPY && PF12807:Translation initiation factor eIF3 subunit 135|PF15044:Mitochondrial function, CLU-N-term|PF13424:Tetratricopeptide repeat	-
TraesCS2A03G1220600	TraesCS2A02G526100	1.04987	0	0	9.10456	6.0544	14.9799	0.349955	10.0463	-4.7242	0.00221021	0.0281823	Chr2A	Q8LC53.1 RecName: Full=Protein EPIDERMAL PATTERNING FACTOR 2; Contains: RecName: Full=MEPF2; Flags: Precursor && PF17181:Epidermal patterning factor proteins	-
TraesCS2A03G1245900	TraesCS2A02G539900	13.6483	19.9372	11.3734	48.2542	51.4624	29.0786	14.9863	42.9317	-1.51991	0.00201491	0.0264165	Chr2A	PF02631:RecX family	-
TraesCS2A03G1294300	TraesCS2A02G590600	3613.64	2893.11	3484.39	12201.9	20129.9	7258.2	3330.38	13196.7	-1.98639	2.35e-06	0.000137124	Chr2A	P13653.1 RecName: Full=Protochlorophyllide reductase A, chloroplastic; Short=PCR A; AltName: Full=NADPH-protochlorophyllide oxidoreductase A; Short=POR A; Flags: Precursor && PF00106:short chain dehydrogenase	adh_short
TraesCS2A03G1297200	TraesCS2A02G589300	2.09973	2.21524	3.10183	29.1346	26.2357	14.9799	2.47227	23.4501	-3.24131	8.88e-05	0.00253878	Chr2A	C4R628.1 RecName: Full=Vacuolar membrane protease; AltName: Full=FXNA-related family protease 1 && PF04389:Peptidase family M28	-
TraesCS2A03G1308700	TraesCS2A02G583600	59.8424	35.4439	64.1045	142.942	95.8614	102.216	53.1303	113.673	-1.09552	0.000643816	0.011462	Chr2A	Q9SJ54.1 RecName: Full=NDR1/HIN1-like protein 12 && PF03168:Late embryogenesis abundant protein	-
TraesCS2A03G1330400	TraesCS2A02G575500	112.336	84.1793	95.1227	252.196	249.24	178.878	97.2126	226.771	-1.22032	3.54e-07	2.87e-05	Chr2A	Q6YTI3.1 RecName: Full=Thioredoxin-like 4, chloroplastic; AltName: Full=Lilium-type thioredoxin 3; Flags: Precursor && PF00085:Thioredoxin	-
TraesCS2A03G1334100	TraesCS2A02G573900	788.45	908.25	382.559	3828.47	1747.7	2497.24	693.086	2691.14	-1.95726	2.48e-05	0.000932143	Chr2A	Q01548.1 RecName: Full=Peroxidase 2 && PF00141:Peroxidase	-
TraesCS2A03G1334200	TraesCS2A02G573800	67.1914	65.3497	40.3238	148.404	190.714	143.631	57.6216	160.916	-1.48202	1.84e-07	1.66e-05	Chr2A	-	-
TraesCS2A03G1357400	TraesCS2A02G562400	101.837	105.224	94.0888	216.688	280.521	222.055	100.383	239.755	-1.25533	1.52e-08	1.97e-06	Chr2A	Q9FR37.1 RecName: Full=Amidase 1; Short=AtAMI1; AltName: Full=Translocon at the outer membrane of chloroplasts 64-I; Short=AtTOC64-I && PF01425:Amidase	Amidase
TraesCS2A03G1358800	TraesCS2A02G563100	796.849	423.112	607.958	1473.12	2009.05	1379.91	609.306	1620.69	-1.41067	1.47e-11	4.29e-09	Chr2A	Q9ZST1.1 RecName: Full=30S ribosomal protein S17, chloroplastic; AltName: Full=CS17; Flags: Precursor && PF00366:Ribosomal protein S17	-
TraesCS2A03G1359700	TraesCS2A02G563400	69.2912	97.4708	73.4099	37.3287	22.1995	32.6033	80.0573	30.7105	1.37692	0.000128587	0.00339789	Chr2A	Q9FDY4.1 RecName: Full=BTB/POZ domain and ankyrin repeat-containing protein NPR1; Short=OsNPR1; AltName: Full=NPR1 homolog 1; Short=OsNH1 && PF12313:NPR1/NIM1 like defence protein C terminal|PF00069:Protein kinase d	Pkinase
TraesCS2A03G1365800	TraesCS2A02G559600	309.711	212.664	224.366	447.944	619.567	660.878	248.913	576.13	-1.21025	3.81e-09	5.95e-07	Chr2A	PF12527:Protein of unknown function (DUF3727)	-
TraesCS2B03G0040000	TraesCS2B02G004000	97.6376	105.224	103.394	169.345	242.176	304.004	102.085	238.508	-1.22473	1.12e-06	7.47e-05	Chr2B	F4I0K2.2 RecName: Full=Fructokinase-like 2, chloroplastic; AltName: Full=pfkB-type carbohydrate kinase family protein 1; Flags: Precursor && PF00294:pfkB family carbohydrate kinase	PfkB
TraesCS2B03G0040200	TraesCS2B02G003800	43.0445	55.3811	68.2402	20.03	34.3083	15.8611	55.5553	23.3998	1.2555	0.00374215	0.0412664	Chr2B	-	-
TraesCS2B03G0042400	TraesCS2B02G002800	17.8477	15.5067	39.2898	1.82091	4.03627	7.93053	24.2148	4.5959	2.39215	0.00151494	0.0216352	Chr2B	Q8RV79.1 RecName: Full=Cytosolic sulfotransferase 11; Short=AtSOT11 && PF00685:Sulfotransferase domain	Sulfotransfer_1
TraesCS2B03G0079800	TraesCS2B02G038500	3.1496	0	6.20366	14.5673	23.2085	15.8611	3.11775	17.879	-2.50194	0.00471941	0.0482069	Chr2B	Q84MB3.1 RecName: Full=1-aminocyclopropane-1-carboxylate oxidase homolog 1 && PF14226:non-haem dioxygenase in morphine synthesis N-terminal	-
TraesCS2B03G0082300	TraesCS2B02G040000	45.1443	57.5964	104.428	296.809	341.065	777.192	69.0563	471.688	-2.77168	1.04e-06	7.04e-05	Chr2B	Q69TH8.1 RecName: Full=Putative 12-oxophytodienoate reductase 4; AltName: Full=OPDA-reductase 4; Short=OsOPR4 && PF00724:NADH:flavin oxidoreductase / NADH oxidase family	Oxidored_FMN
TraesCS2B03G0083100	TraesCS2B02G040600	0	1.10762	1.03394	21.8509	0	37.0091	0.713855	19.62	-4.7917	0.000921193	0.0149943	Chr2B	Q2V6J9.1 RecName: Full=UDP-glucose flavonoid 3-O-glucosyltransferase 7; AltName: Full=Flavonol 3-O-glucosyltransferase 7; Short=FaGT7 && PF00201:UDP-glucoronosyl and UDP-glucosyl transferase	UDPGT
TraesCS2B03G0122600	TraesCS2B02G058200	120.735	107.439	124.073	287.704	345.101	325.152	117.416	319.319	-1.4422	5.03e-13	2.15e-10	Chr2B	A5U866.1 RecName: Full=Cyclopropane mycolic acid synthase 1; Short=CMAS; AltName: Full=Cyclopropane-fatty-acyl-phospholipid synthase; Short=CFA synthase; Short=Cyclopropane fatty acid synthase; AltName: Full=Mycolic	Amino_oxidase
TraesCS2B03G0124700	TraesCS2B02G059500	79.7898	43.1973	45.4935	129.285	124.115	132.176	56.1602	128.525	-1.19348	7.92e-05	0.00230638	Chr2B	A3BNA1.1 RecName: Full=Flowering-promoting factor 1-like protein 5; AltName: Full=FPF1-like protein 5 && -	-
TraesCS2B03G0141100	TraesCS2B02G065700	8.39893	14.3991	18.611	0	2.01813	0.88117	13.803	0.966435	3.87381	0.00104479	0.0165063	Chr2B	PF13962:Domain of unknown function	-
TraesCS2B03G0155300	TraesCS2B02G070700	75.5904	47.6278	29.9843	108.344	133.197	98.6911	51.0675	113.411	-1.15023	0.000793792	0.0134423	Chr2B	O64750.1 RecName: Full=Protein EMBRYO SAC DEVELOPMENT ARREST 3, chloroplastic; Flags: Precursor && -	-
TraesCS2B03G0167200	TraesCS2B02G075000	41.9947	50.9506	26.8825	82.8515	108.979	61.6819	39.9426	84.5042	-1.08119	0.00305984	0.0356462	Chr2B	A3DH97.1 RecName: Full=Anti-sigma-I factor RsgI6; AltName: Full=Endo-1,4-beta-xylanase && PF00331:Glycosyl hydrolase family 10	-
TraesCS2B03G0168600	TraesCS2B02G075700	0	2.21524	0	55.5378	75.68	15.8611	0.738415	49.0263	-6.10131	2.26e-07	1.96e-05	Chr2B	PF01190:Pollen protein Ole e 1 like	-
TraesCS2B03G0168700	TraesCS2B02G075800	14.6981	29.9058	49.6293	549.915	813.308	138.344	31.4111	500.522	-3.99355	1.16e-06	7.72e-05	Chr2B	PF01190:Pollen protein Ole e 1 like	-
TraesCS2B03G0178600	TraesCS2B02G078900	12.5984	3.32287	8.27154	33.6869	97.8795	11.4552	8.06427	47.6739	-2.55462	0.000321434	0.00677402	Chr2B	P00871.2 RecName: Full=Ribulose bisphosphate carboxylase small chain PWS4.3, chloroplastic; Short=RuBisCO small subunit PWS4.3; Flags: Precursor && PF12338:Ribulose-1,5-bisphosphate carboxylase small subunit|PF00101	-
TraesCS2B03G0179200	TraesCS2B02G079300	30.4461	71.9955	47.5614	249.465	539.851	150.68	50.001	313.332	-2.64803	3.02e-05	0.00108117	Chr2B	P00871.2 RecName: Full=Ribulose bisphosphate carboxylase small chain PWS4.3, chloroplastic; Short=RuBisCO small subunit PWS4.3; Flags: Precursor && PF00101:Ribulose bisphosphate carboxylase, small chain|PF12338:Ribu	-
TraesCS2B03G0179300	TraesCS2B02G079400	6.2992	6.64573	9.30548	28.2241	52.4715	10.574	7.41681	30.4232	-2.02958	0.00309033	0.0358978	Chr2B	P26667.1 RecName: Full=Ribulose bisphosphate carboxylase small chain PW9, chloroplastic; Short=RuBisCO small subunit PW9; Flags: Precursor && PF00101:Ribulose bisphosphate carboxylase, small chain|PF12338:Ribulose-1	-
TraesCS2B03G0179600	TraesCS2B02G079500	15.748	14.3991	14.4752	90.1351	113.016	50.2267	14.8741	84.4591	-2.50273	7.72e-09	1.1e-06	Chr2B	P26667.1 RecName: Full=Ribulose bisphosphate carboxylase small chain PW9, chloroplastic; Short=RuBisCO small subunit PW9; Flags: Precursor && PF00101:Ribulose bisphosphate carboxylase, small chain|PF12338:Ribulose-1	-
TraesCS2B03G0193100	TraesCS2B02G085100	19.9475	17.722	17.577	6.37319	3.0272	1.76234	18.4155	3.72091	2.30684	0.00348298	0.0391563	Chr2B	PF00300:Histidine phosphatase superfamily (branch 1)	-
TraesCS2B03G0210000	TraesCS2B02G091300	25.1968	17.722	13.4413	66.4633	42.3808	66.9689	18.7867	58.6043	-1.64371	0.000165898	0.00412903	Chr2B	Q8H1H9.1 RecName: Full=Primary amine oxidase; AltName: Full=Amine oxidase [copper-containing]; Flags: Precursor && PF02727:Copper amine oxidase, N2 domain|PF01179:Copper amine oxidase, enzyme domain|PF02728:Copper a	-
TraesCS2B03G0213800	TraesCS2B02G093100	0	0	0	7.28365	4.03627	20.2669	0	10.5289	-5.75482	0.000328185	0.00687887	Chr2B	A6YIH8.1 RecName: Full=Premnaspirodiene oxygenase; Short=HPO; AltName: Full=Cytochrome P450 71D55 && PF00067:Cytochrome P450	p450
TraesCS2B03G0230000	TraesCS2B02G099500	76.6402	71.9955	39.2898	148.404	225.022	174.472	62.6418	182.633	-1.54426	1.65e-07	1.52e-05	Chr2B	P48619.1 RecName: Full=Omega-3 fatty acid desaturase, chloroplastic; Flags: Precursor && PF00487:Fatty acid desaturase|PF11960:Domain of unknown function (DUF3474)	-
TraesCS2B03G0318200	TraesCS2B02G130300	103.937	89.7174	85.8172	443.392	590.304	282.856	93.1571	438.851	-2.23477	3.32e-18	3.62e-15	Chr2B	PF06596:Photosystem II reaction centre X protein (PsbX)	-
TraesCS2B03G0342100	TraesCS2B02G141600	0	1.10762	4.13577	13.6568	5.04534	28.1974	1.7478	15.6332	-3.15535	0.00403757	0.0435043	Chr2B	Q9M8K6.1 RecName: Full=Transcription factor MUTE; AltName: Full=Basic helix-loop-helix protein 45; Short=AtbHLH45; Short=bHLH 45; AltName: Full=Transcription factor EN 20; AltName: Full=bHLH transcription factor bHL	HLH
TraesCS2B03G0367700	TraesCS2B02G151800	3.1496	1.10762	4.13577	19.1196	27.2448	6.16819	2.79766	17.5109	-2.63211	0.00421408	0.0447017	Chr2B	PF08547:Complex I intermediate-associated protein 30 (CIA30)|PF13460:NAD(P)H-binding	-
TraesCS2B03G0383900	TraesCS2B02G157600	32.5459	25.4753	45.4935	176.628	233.095	157.729	34.5049	189.151	-2.44978	4.96e-16	4.17e-13	Chr2B	B8ANF1.1 RecName: Full=Magnesium-chelatase subunit ChlH, chloroplastic; Short=Mg-chelatase subunit H; AltName: Full=Mg-protoporphyrin IX chelatase subunit ChlH; Flags: Precursor && PF11965:Domain of unknown function	-
TraesCS2B03G0391200	TraesCS2B02G160800	75.5904	110.762	224.366	28.2241	32.2902	57.2761	136.906	39.2634	1.79959	8.01e-06	0.000376298	Chr2B	-	-
TraesCS2B03G0416600	TraesCS2B02G170700	49.3437	47.6278	63.0705	118.359	121.088	94.2852	53.3473	111.244	-1.05802	0.000303301	0.00651192	Chr2B	Q84UQ1.1 RecName: Full=DEAD-box ATP-dependent RNA helicase 42 && PF00271:Helicase conserved C-terminal domain|PF00270:DEAD/DEAH box helicase	DEAD
TraesCS2B03G0417900	TraesCS2B02G170900	28.3464	24.3677	31.0183	122.001	81.7344	51.989	27.9108	85.2415	-1.60907	4.75e-05	0.00154558	Chr2B	Q94F40.1 RecName: Full=GDSL esterase/lipase At1g28600; AltName: Full=Extracellular lipase At1g28600; Flags: Precursor && PF00657:GDSL-like Lipase/Acylhydrolase	Lipase_GDSL
TraesCS2B03G0419000	TraesCS2B02G171200	0	7.75336	1.03394	25.4928	3.0272	59.0384	2.9291	29.1861	-3.33928	0.00102348	0.0162505	Chr2B	Q6ZAC1.1 RecName: Full=Probable 4-coumarate--CoA ligase 5; Short=4CL 5; Short=Os4CL5; AltName: Full=4-coumaroyl-CoA synthase 5 && PF13193:AMP-binding enzyme C-terminal domain|PF00501:AMP-binding enzyme	AMP-binding
TraesCS2B03G0419200	TraesCS2B02G171300	15.748	25.4753	25.8486	50.0751	53.4806	76.6618	22.3573	60.0725	-1.4282	0.000579545	0.0106075	Chr2B	Q9LW57.1 RecName: Full=Probable plastid-lipid-associated protein 6, chloroplastic; AltName: Full=Fibrillin-4; AltName: Full=Fibrillin-6; AltName: Full=Harpin-binding protein 1; Short=HrBP1; AltName: Full=Plastoglobu	-
TraesCS2B03G0432300	TraesCS2B02G177500	0	2.21524	2.06789	17.2987	21.1904	36.128	1.42771	24.8723	-4.13226	2.07e-05	0.000799823	Chr2B	F4IK45.1 RecName: Full=Cytochrome P450 709B2 && PF00067:Cytochrome P450	p450
TraesCS2B03G0441100	TraesCS2B02G181600	554.329	398.744	441.494	1044.29	1363.25	1229.23	464.856	1212.26	-1.38224	1.45e-16	1.28e-13	Chr2B	Q08935.1 RecName: Full=29 kDa ribonucleoprotein A, chloroplastic; AltName: Full=CP29A; Flags: Precursor && PF00076:RNA recognition motif. (a.k.a. RRM, RBD, or RNP domain)	RRM_1
TraesCS2B03G0442000	TraesCS2B02G182200	0	0	0	10.015	7.06347	2.64351	0	6.574	-5.06943	0.00391333	0.0425538	Chr2B	-	-
TraesCS2B03G0442100	TraesCS2B02G182300	15.748	12.1838	20.6789	99.2397	41.3718	22.0293	16.2036	54.2136	-1.74035	0.00167986	0.0233404	Chr2B	Q9SNB6.1 RecName: Full=E3 ubiquitin-protein ligase RDUF1; AltName: Full=RING and DUF1117 domain-containing protein 1; Short=AtRDUF1 && PF13639:Ring finger domain	-
TraesCS2B03G0452100	TraesCS2B02G187200	24.1469	19.9372	36.188	116.538	49.4443	59.0384	26.7574	75.007	-1.48607	0.000557107	0.0103159	Chr2B	Q7XI41.1 RecName: Full=Probable trehalose-phosphate phosphatase 3; Short=OsTPP3; AltName: Full=Trehalose 6-phosphate phosphatase && PF02358:Trehalose-phosphatase	-
TraesCS2B03G0472500	TraesCS2B02G195900	30.4461	40.982	37.2219	56.4483	78.7072	89.8794	36.2167	75.0116	-1.05149	0.00301393	0.035285	Chr2B	Q8H398.2 RecName: Full=SPX domain-containing protein 6; AltName: Full=Protein SPX DOMAIN GENE 6; Short=OsSPX6 && PF03105:SPX domain	SPX
TraesCS2B03G0473900	TraesCS2B02G196500	220.472	168.359	163.363	597.259	368.31	318.984	184.065	428.184	-1.21801	4.85e-07	3.78e-05	Chr2B	B5X3B2.1 RecName: Full=Adipocyte plasma membrane-associated protein && PF03088:Strictosidine synthase	Str_synth
TraesCS2B03G0506300	TraesCS2B02G209700	14.6981	11.0762	20.6789	48.2542	93.8433	37.0091	15.4844	59.7022	-1.9399	7.61e-05	0.00222775	Chr2B	PF11282:Protein of unknown function (DUF3082)	-
TraesCS2B03G0544400	TraesCS2B02G226100	36.7453	70.8878	29.9843	90.1351	110.997	96.9287	45.8725	99.3537	-1.11825	0.00150465	0.0215322	Chr2B	Q8L9X2.1 RecName: Full=Chaperonin-like RbcX protein 2, chloroplastic; Short=AtRBCX2; Flags: Precursor && PF02341:RbcX protein	-
TraesCS2B03G0545700	TraesCS2B02G226800	58.7925	60.9192	22.7467	100.15	138.242	91.6417	47.4862	110.011	-1.21302	0.000887651	0.0145923	Chr2B	-	-
TraesCS2B03G0546300	TraesCS2B02G227100	58.7925	32.1211	59.9687	129.285	140.26	96.9287	50.2941	122.158	-1.27622	6.19e-05	0.00189386	Chr2B	Q8GZ79.1 RecName: Full=Protein TIC 20-I, chloroplastic; AltName: Full=Translocon at the inner envelope membrane of chloroplasts 20-I; Short=AtTIC20-I; Flags: Precursor && PF16166:Chloroplast import apparatus Tic20-l	-
TraesCS2B03G0550300	TraesCS2B02G228300	11.5485	2.21524	8.27154	37.3287	47.4262	28.1974	7.34511	37.6508	-2.34741	0.000109147	0.00299543	Chr2B	Q93VA3.1 RecName: Full=Cytochrome c6, chloroplastic; AltName: Full=Cytochrome c-552; Short=Atc6; AltName: Full=Cytochrome c-553; AltName: Full=Cytochrome c553; AltName: Full=Soluble cytochrome f; Flags: Precursor &&	-
TraesCS2B03G0559500	TraesCS2B02G232900	38.8451	43.1973	11.3734	170.255	98.8886	114.552	31.1386	127.899	-2.04282	3.49e-07	2.84e-05	Chr2B	Q41144.1 RecName: Full=Sugar carrier protein C && PF00083:Sugar (and other) transporter	Sugar_tr
TraesCS2B03G0560500	TraesCS2B02G233400	9.4488	15.5067	5.16971	114.717	211.904	68.7313	10.0417	131.784	-3.72041	1.76e-14	1.07e-11	Chr2B	Q9XF88.1 RecName: Full=Chlorophyll a-b binding protein CP29.2, chloroplastic; AltName: Full=LHCB4.2; AltName: Full=LHCII protein 4.2; Flags: Precursor && PF00504:Chlorophyll A-B binding protein	-
TraesCS2B03G0563500	TraesCS2B02G234500	115.485	98.5784	115.802	376.929	429.863	192.976	109.955	333.256	-1.59801	4.51e-09	6.87e-07	Chr2B	Q7X9A6.1 RecName: Full=Cytochrome b6-f complex iron-sulfur subunit, chloroplastic; AltName: Full=Plastohydroquinone:plastocyanin oxidoreductase iron-sulfur protein; AltName: Full=Rieske iron-sulfur protein; Short=IS	-
TraesCS2B03G0578800	TraesCS2B02G239000	245.669	263.614	343.269	76.4783	135.215	105.74	284.184	105.811	1.42831	6.83e-09	9.93e-07	Chr2B	PF13365:Trypsin-like peptidase domain	-
TraesCS2B03G0580900	TraesCS2B02G240000	102.887	126.269	120.971	451.586	520.679	265.232	116.709	412.499	-1.8208	2.22e-13	1.08e-10	Chr2B	Q0D5P8.1 RecName: Full=Oxygen-evolving enhancer protein 3, chloroplastic; Short=OEE3; AltName: Full=LP02; Flags: Precursor >P83646.2 RecName: Full=Oxygen-evolving enhancer protein 3, chloroplastic; Short=OEE3; AltNa	-
TraesCS2B03G0589200	TraesCS2B02G244100	2.09973	9.9686	0	21.8509	10.0907	52.8702	4.02278	28.2706	-2.83423	0.00141868	0.0206409	Chr2B	Q06398.2 RecName: Full=Probable glutathione S-transferase GSTU6; AltName: Full=28 kDa cold-induced protein && PF13410:Glutathione S-transferase, C-terminal domain|PF13417:Glutathione S-transferase, N-terminal domain	-
TraesCS2B03G0595000	TraesCS2B02G246600	50.3936	29.9058	36.188	148.404	236.122	126.007	38.8291	170.178	-2.12816	6.59e-11	1.65e-08	Chr2B	A2YLX7.1 RecName: Full=Protein LHCP TRANSLOCATION DEFECT; Flags: Precursor >A3BKF2.1 RecName: Full=Protein LHCP TRANSLOCATION DEFECT; Flags: Precursor && -	-
TraesCS2B03G0603800	TraesCS2B02G275100	122.834	114.085	133.379	140.21	327.947	426.486	123.433	298.214	-1.27239	4.33e-05	0.00144102	Chr2B	Q6Z4A7.1 RecName: Full=Probable 5'-adenylylsulfate reductase 1, chloroplastic; AltName: Full=Adenosine 5'-phosphosulfate 5'-adenylylsulfate sulfotransferase 1; Short=APS sulfotransferase 1; AltName: Full=Adenosine 5	-
TraesCS2B03G0604000	TraesCS2B02G248900	20.9973	38.7668	13.4413	57.3587	63.5712	51.989	24.4018	57.6397	-1.24455	0.00446532	0.0464037	Chr2B	PF02190:ATP-dependent protease La (LON) substrate-binding domain	-
TraesCS2B03G0679100	TraesCS2B02G264100	135.433	87.5022	108.564	284.973	331.983	141.868	110.5	252.941	-1.19262	5.71e-05	0.00177957	Chr2B	Q6YT73.1 RecName: Full=Peroxisomal (S)-2-hydroxy-acid oxidase GLO5; AltName: Full=Glycolate oxidase 5; Short=GOX 5; Short=OsGLO5; AltName: Full=Short chain alpha-hydroxy acid oxidase GLO5 >B8B7C5.1 RecName: Full=Per	FMN_dh
TraesCS2B03G0695000	TraesCS2B02G267500	448.293	313.457	354.642	894.068	1018.15	573.642	372.131	828.619	-1.154	5.51e-08	6.08e-06	Chr2B	Q00434.1 RecName: Full=Oxygen-evolving enhancer protein 2, chloroplastic; Short=OEE2; AltName: Full=23 kDa subunit of oxygen evolving system of photosystem II; AltName: Full=23 kDa thylakoid membrane protein; AltNam	-
TraesCS2B03G0698600	TraesCS2B02G272300	8.39893	6.64573	26.8825	101.061	123.106	59.0384	13.9757	94.4017	-2.74676	1.41e-08	1.83e-06	Chr2B	P36886.1 RecName: Full=Photosystem I reaction center subunit psaK, chloroplastic; AltName: Full=Light-harvesting complex I 7 kDa protein; AltName: Full=PSI-K; AltName: Full=Photosystem I subunit X; Flags: Precursor	-
TraesCS2B03G0726400	TraesCS2B02G280300	0	0	0	0.910456	10.0907	9.69287	0	6.898	-5.13858	0.00435583	0.0457117	Chr2B	Q9C983.1 RecName: Full=Probable WRKY transcription factor 57; AltName: Full=WRKY DNA-binding protein 57 && PF03106:WRKY DNA -binding domain	WRKY
TraesCS2B03G0731200	TraesCS2B02G282400	7.34906	12.1838	10.3394	47.3437	30.272	57.2761	9.95745	44.9639	-2.18012	3.17e-05	0.00112604	Chr2B	P23586.2 RecName: Full=Sugar transport protein 1; AltName: Full=Glucose transporter; AltName: Full=Hexose transporter 1 && PF00083:Sugar (and other) transporter	Sugar_tr
TraesCS2B03G0749500	TraesCS2B02G289000	16.7979	15.5067	17.577	65.5528	46.4171	74.0183	16.6272	61.9961	-1.89997	7.5e-06	0.000356486	Chr2B	Q0JEE2.1 RecName: Full=WRKY transcription factor WRKY51; Short=OsWRKY51 && PF03106:WRKY DNA -binding domain|PF10533:Plant zinc cluster domain	WRKY
TraesCS2B03G0753100	TraesCS2B02G289900	0	2.21524	3.10183	5.46273	4.03627	76.6618	1.77236	28.7203	-4.02224	0.000394697	0.00792064	Chr2B	Q2HIV9.1 RecName: Full=Transcription factor bHLH35; AltName: Full=Basic helix-loop-helix protein 35; Short=AtbHLH35; Short=bHLH 35; AltName: Full=Transcription factor EN 41; AltName: Full=bHLH transcription factor b	HLH
TraesCS2B03G0756600	TraesCS2B02G290700	58.7925	24.3677	46.5274	98.3292	108.979	76.6618	43.2292	94.6568	-1.12652	0.00158268	0.0223554	Chr2B	O23342.1 RecName: Full=Preprotein translocase subunit SECE1; Flags: Precursor && -	-
TraesCS2B03G0779000	TraesCS2B02G297800	24.1469	16.6143	22.7467	58.2692	54.4896	43.1773	21.1693	51.9787	-1.29298	0.00201395	0.0264139	Chr2B	Q9SM43.2 RecName: Full=Violaxanthin de-epoxidase, chloroplastic; Flags: Precursor && PF07137:VDE lipocalin domain	-
TraesCS2B03G0794500	TraesCS2B02G303600	0	0	0	4.55228	3.0272	22.0293	0	9.86958	-5.66192	0.000663471	0.01174	Chr2B	A2XSX6.1 RecName: Full=Protein TIFY 9 && PF09425:Jas motif|PF06200:tify domain	Zim
TraesCS2B03G0805800	TraesCS2B02G308600	44.0944	77.5336	47.5614	821.231	817.344	872.358	56.3964	836.978	-3.89672	2.55e-78	5.93e-74	Chr2B	Q5NAY4.1 RecName: Full=Histidinol dehydrogenase, chloroplastic; Short=HDH; Flags: Precursor && PF00815:Histidinol dehydrogenase	-
TraesCS2B03G0811700	TraesCS2B02G311100	72.4408	45.4125	66.1723	128.374	202.823	202.669	61.3419	177.955	-1.53417	1.01e-07	1e-05	Chr2B	P27788.1 RecName: Full=Ferredoxin-3, chloroplastic; AltName: Full=Ferredoxin III; Short=Fd III; Flags: Precursor && PF00111:2Fe-2S iron-sulfur cluster binding domain	Fer2
TraesCS2B03G0815100	TraesCS2B02G312600	9.4488	4.43049	5.16971	93.7769	150.351	43.1773	6.34967	95.7684	-3.90869	1.74e-12	6.27e-10	Chr2B	Q949Q5.1 RecName: Full=Photosystem I subunit O; Short=PSI-O; Flags: Precursor && -	-
TraesCS2B03G0817600	TraesCS2B02G313500	29.3963	25.4753	23.7807	49.1646	62.5622	66.9689	26.2174	59.5652	-1.18382	0.00209204	0.0271118	Chr2B	PF06916:Protein of unknown function (DUF1279)	-
TraesCS2B03G0818000	TraesCS2B02G313800	35.6955	42.0897	36.188	88.3142	87.7889	68.7313	37.991	81.6114	-1.10311	0.000829741	0.0138758	Chr2B	Q9SVD0.1 RecName: Full=Protein SMAX1-LIKE 3; Short=AtSMXL3 && -	-
TraesCS2B03G0818100	TraesCS2B02G313900	218.372	129.592	201.619	480.721	439.953	185.046	183.194	368.573	-1.00715	0.000780488	0.0132715	Chr2B	Q9SJ54.1 RecName: Full=NDR1/HIN1-like protein 12 && PF03168:Late embryogenesis abundant protein	-
TraesCS2B03G0856200	TraesCS2B02G328500	73.4906	59.8116	70.3081	137.479	219.977	131.294	67.8701	162.917	-1.26024	9.36e-06	0.00042262	Chr2B	Q9C667.1 RecName: Full=Chaperonin 60 subunit beta 4, chloroplastic; Short=CPN-60 beta 4; Flags: Precursor && PF00118:TCP-1/cpn60 chaperonin family	-
TraesCS2B03G0865400	TraesCS2B02G332300	110.236	81.9641	99.2585	213.957	320.883	215.006	97.1528	249.949	-1.36078	3.01e-08	3.61e-06	Chr2B	P23902.1 RecName: Full=3-oxoacyl-[acyl-carrier-protein] synthase I, chloroplastic; AltName: Full=Beta-ketoacyl-ACP synthase I; Short=KAS I; Flags: Precursor && PF02801:Beta-ketoacyl synthase, C-terminal domain|PF001	ketoacyl-synt
TraesCS2B03G0885800	TraesCS2B02G340300	38.8451	28.7982	63.0705	305.003	457.107	195.62	43.5712	319.243	-2.86868	2.44e-18	2.7e-15	Chr2B	P27525.1 RecName: Full=Chlorophyll a-b binding protein CP24 10B, chloroplastic; Short=CAB-10B; Short=LHCP; Flags: Precursor && PF00504:Chlorophyll A-B binding protein	-
TraesCS2B03G0889300	TraesCS2B02G342200	278.215	254.753	293.64	823.962	1076.67	425.605	275.536	775.414	-1.49182	3.79e-09	5.93e-07	Chr2B	P09315.1 RecName: Full=Glyceraldehyde-3-phosphate dehydrogenase A, chloroplastic; AltName: Full=NADP-dependent glyceraldehydephosphate dehydrogenase subunit A; Flags: Precursor && PF00044:Glyceraldehyde 3-phosphate	-
TraesCS2B03G0894100	TraesCS2B02G344400	39.8949	26.5829	22.7467	71.926	82.7435	53.7514	29.7415	69.4736	-1.22182	0.00146396	0.021119	Chr2B	-	-
TraesCS2B03G0902900	TraesCS2B02G349700	0	0	1.03394	2.73137	1.00907	29.0786	0.344648	10.9397	-4.84911	0.00439122	0.0459391	Chr2B	Q5PNZ7.1 RecName: Full=Heavy metal-associated isoprenylated plant protein 46; Short=AtHIP46; AltName: Full=Farnesylated protein 5; Short=AtFP5; Flags: Precursor && -	-
TraesCS2B03G0924200	TraesCS2B02G358500	108.136	97.4708	98.2246	48.2542	40.3627	40.5338	101.277	43.0502	1.23367	3.63e-05	0.0012517	Chr2B	-	-
TraesCS2B03G0926400	TraesCS2B02G359400	109.186	104.117	143.718	148.404	241.167	521.653	119.007	303.741	-1.35211	8.01e-05	0.00232405	Chr2B	Q94BN0.1 RecName: Full=BTB/POZ and TAZ domain-containing protein 2; AltName: Full=BTB and TAZ domain protein 2 && PF00651:BTB/POZ domain|PF02135:TAZ zinc finger	BTB
TraesCS2B03G0950700	TraesCS2B02G369600	2.09973	1.10762	4.13577	18.2091	18.1632	12.3364	2.44771	16.2362	-2.71772	0.0026398	0.0320151	Chr2B	Q680K2.1 RecName: Full=Haloacid dehalogenase-like hydrolase domain-containing protein At4g39970; Flags: Precursor && PF13419:Haloacid dehalogenase-like hydrolase	-
TraesCS2B03G0957300	TraesCS2B02G372100	47.244	18.8296	35.1541	49.1646	92.8342	86.3547	33.7425	76.1178	-1.16981	0.00417339	0.0443983	Chr2B	-	-
TraesCS2B03G0971200	TraesCS2B02G378600	28.3464	15.5067	33.0862	83.7619	68.6166	44.0585	25.6464	65.479	-1.34777	0.00143044	0.0207644	Chr2B	Q8W3M4.1 RecName: Full=Uncharacterized protein At4g06744; Flags: Precursor && -	-
TraesCS2B03G0982100	TraesCS2B02G382900	0	0	0	10.9255	17.1541	0.88117	0	9.65359	-5.62057	0.000941251	0.0152399	Chr2B	Q8VYU7.1 RecName: Full=Purple acid phosphatase 4; Flags: Precursor && PF00149:Calcineurin-like phosphoesterase	Metallophos
TraesCS2B03G0997500	TraesCS2B02G390700	32.5459	42.0897	23.7807	63.7319	91.8251	84.5923	32.8054	80.0498	-1.28896	0.000358739	0.00734524	Chr2B	Q8LL05.1 RecName: Full=Granule-bound starch synthase 1b, chloroplastic/amyloplastic; AltName: Full=Granule-bound starch synthase Ib; Flags: Precursor && PF00534:Glycosyl transferases group 1|PF08323:Starch synthase	Glycos_transf_1
TraesCS2B03G1003500	TraesCS2B02G393900	8.39893	4.43049	3.10183	27.3137	23.2085	27.3163	5.31042	25.9462	-2.28893	0.000690772	0.0120875	Chr2B	Q9LHJ2.1 RecName: Full=UDP-glycosyltransferase 82A1 && PF00201:UDP-glucoronosyl and UDP-glucosyl transferase	UDPGT
TraesCS2B03G1008100	TraesCS2B02G396000	0	0	0	12.7464	5.04534	5.28702	0	7.69291	-5.29899	0.00160751	0.0226058	Chr2B	O49561.2 RecName: Full=Gibberellin 2-beta-dioxygenase 8; AltName: Full=GA 2-oxidase 8; AltName: Full=Gibberellin 2-beta-hydroxylase 8; AltName: Full=Gibberellin 2-oxidase 8 && PF14226:non-haem dioxygenase in morphin	2OG-FeII_Oxy
TraesCS2B03G1009400	TraesCS2B02G396800	81.8896	78.6412	87.8851	311.376	215.94	180.64	82.8053	235.985	-1.51054	4.14e-09	6.37e-07	Chr2B	Q7XUA6.1 RecName: Full=Probable aquaporin PIP2-3; AltName: Full=OsPIP2;3; AltName: Full=Plasma membrane intrinsic protein 2-3 && PF00230:Major intrinsic protein	-
TraesCS2B03G1015300	TraesCS2B02G398400	2.09973	12.1838	8.27154	27.3137	15.136	110.146	7.51837	50.8653	-2.76621	0.000136231	0.00355275	Chr2B	Q43210.1 RecName: Full=Phenylalanine ammonia-lyase && PF00221:Aromatic amino acid lyase	-
TraesCS2B03G1026200	TraesCS2B02G403000	14.6981	3.32287	18.611	87.4038	46.4171	62.5631	12.2107	65.4613	-2.41512	2.35e-06	0.000137124	Chr2B	P49175.1 RecName: Full=Beta-fructofuranosidase 1; AltName: Full=Invertase 1; AltName: Full=Sucrose 1; Flags: Precursor && PF00251:Glycosyl hydrolases family 32 N-terminal domain|PF08244:Glycosyl hydrolases family 32	-
TraesCS2B03G1029600	TraesCS2B02G404600	333.857	316.78	360.846	630.946	876.879	578.048	337.161	695.291	-1.04302	1.6e-08	2.06e-06	Chr2B	I1K0K6.1 RecName: Full=Elongation factor G-2, chloroplastic; Short=cEF-G 2; Flags: Precursor && PF00009:Elongation factor Tu GTP binding domain|PF00679:Elongation factor G C-terminus|PF03144:Elongation factor Tu dom	GTP_EFTU
TraesCS2B03G1056300	TraesCS2B02G414500	9.4488	11.0762	9.30548	47.3437	53.4806	53.7514	9.9435	51.5252	-2.375	7.45e-07	5.31e-05	Chr2B	B3SGL0.1 RecName: Full=Beta-carotene 3-hydroxylase, chloroplastic; Short=GenCHYB; Flags: Precursor && PF04116:Fatty acid hydroxylase superfamily	-
TraesCS2B03G1080100	TraesCS2B02G423900	0	0	0	13.6568	17.1541	1.76234	0	10.8578	-5.79089	0.000365224	0.00744269	Chr2B	P29162.1 RecName: Full=L-ascorbate oxidase homolog; AltName: Full=Pollen-specific protein NTP303; Flags: Precursor && PF07732:Multicopper oxidase|PF07731:Multicopper oxidase|PF00394:Multicopper oxidase	-
TraesCS2B03G1098600	TraesCS2B02G431100	91.3384	96.3632	123.039	259.48	188.696	207.075	103.58	218.417	-1.07628	5.41e-06	0.000273145	Chr2B	Q9C7Z9.2 RecName: Full=Serine carboxypeptidase-like 18; Flags: Precursor && PF00450:Serine carboxypeptidase	Peptidase_S10
TraesCS2B03G1146400	TraesCS2B02G451700	73.4906	76.4259	81.6815	28.2241	49.4443	37.8903	77.1994	38.5196	1.00702	0.00332404	0.0379257	Chr2B	Q7XPF8.2 RecName: Full=Cation transporter HKT4; Short=OsHKT4 && PF02386:Cation transport protein	-
TraesCS2B03G1152100	TraesCS2B02G454000	290.813	198.264	249.18	510.766	604.431	468.783	246.086	527.993	-1.0999	7.33e-09	1.05e-06	Chr2B	Q9LF79.1 RecName: Full=Calcium-transporting ATPase 8, plasma membrane-type; AltName: Full=Ca(2+)-ATPase isoform 8 && PF00689:Cation transporting ATPase, C-terminus|PF00702:haloacid dehalogenase-like hydrolase|PF0069	Cation_ATPase_C
TraesCS2B03G1152700	TraesCS2B02G454300	134.383	115.193	120.971	212.136	284.557	289.905	123.516	262.199	-1.08529	6.25e-07	4.66e-05	Chr2B	Q0JEE2.1 RecName: Full=WRKY transcription factor WRKY51; Short=OsWRKY51 && PF03106:WRKY DNA -binding domain|PF10533:Plant zinc cluster domain	WRKY
TraesCS2B03G1160400	TraesCS2B02G457600	17.8477	6.64573	17.577	93.7769	131.179	62.5631	14.0235	95.8396	-2.76398	4.66e-10	9.38e-08	Chr2B	Q9THX6.1 RecName: Full=Thylakoid lumenal 29 kDa protein, chloroplastic; Short=TL29; AltName: Full=LeAPx09; AltName: Full=P29; Flags: Precursor && PF00141:Peroxidase	-
TraesCS2B03G1160500	TraesCS2B02G457700	109.186	91.9327	86.8512	209.405	312.811	348.943	95.99	290.386	-1.59685	5.86e-11	1.52e-08	Chr2B	Q9C7Y2.1 RecName: Full=Multiple organellar RNA editing factor 5, mitochondrial; AltName: Full=RNA editing-interacting protein 5; Flags: Precursor && -	-
TraesCS2B03G1186800	TraesCS2B02G469100	41.9947	67.565	63.0705	155.688	295.657	186.808	57.5434	212.718	-1.88556	3.4e-10	7.28e-08	Chr2B	P19684.1 RecName: Full=33 kDa ribonucleoprotein, chloroplastic; Flags: Precursor && PF00076:RNA recognition motif. (a.k.a. RRM, RBD, or RNP domain)	RRM_1
TraesCS2B03G1193400	TraesCS2B02G471800	9.4488	11.0762	5.16971	71.0155	25.2267	24.6728	8.56491	40.305	-2.23981	0.000282486	0.00617529	Chr2B	Q6RYA0.1 RecName: Full=Salicylic acid-binding protein 2; Short=NtSABP2; AltName: Full=Methyl salicylate esterase && PF12697:Alpha/beta hydrolase family	-
TraesCS2B03G1279700	TraesCS2B02G509100	0	0	2.06789	18.2091	9.08161	17.6234	0.689295	14.9714	-4.41305	0.000821046	0.0137601	Chr2B	F8WKW0.1 RecName: Full=Crocetin glucosyltransferase, chloroplastic; AltName: Full=UDP-glucose glucosyltransferase 1; Short=GjUGT1; AltName: Full=UDP-glycosyltransferase 75L6; Flags: Precursor && PF00201:UDP-glucoron	UDPGT
TraesCS2B03G1290600	TraesCS2B02G513800	37.7952	19.9372	17.577	48.2542	77.6982	52.8702	25.1031	59.6075	-1.2445	0.00383739	0.0419831	Chr2B	-	-
TraesCS2B03G1341500	TraesCS2B02G535500	79.7898	57.5964	92.0209	237.629	214.931	226.461	76.469	226.34	-1.56349	8.62e-11	2.1e-08	Chr2B	F4JJL0.1 RecName: Full=Endonuclease 4; Short=AtENDO4; AltName: Full=Deoxyribonuclease ENDO4; AltName: Full=Single-stranded-nucleate endonuclease ENDO4; Flags: Precursor && PF02265:S1/P1 Nuclease	-
TraesCS2B03G1351400	TraesCS2B02G538800	11.5485	15.5067	6.20366	18.2091	29.263	180.64	11.0863	76.0373	-2.78352	4.78e-05	0.0015516	Chr2B	Q8GXG1.2 RecName: Full=Probable isoaspartyl peptidase/L-asparaginase 2; AltName: Full=L-asparagine amidohydrolase 2; Contains: RecName: Full=Isoaspartyl peptidase/L-asparaginase 2 subunit alpha; Contains: RecName: F	Asparaginase_2
TraesCS2B03G1362300	TraesCS2B02G541900	7.34906	16.6143	19.6449	72.8365	81.7344	33.4845	14.5361	62.6851	-2.10664	2.36e-05	0.000895614	Chr2B	-	-
TraesCS2B03G1389100	TraesCS2B02G553500	14.6981	13.2915	7.2376	50.0751	84.7617	23.7916	11.7424	52.8761	-2.16935	8.96e-05	0.0025579	Chr2B	-	-
TraesCS2B03G1389900	TraesCS2B02G553800	562.728	563.78	407.373	1340.19	794.136	1204.56	511.294	1112.96	-1.12294	2.1e-08	2.62e-06	Chr2B	-	-
TraesCS2B03G1390400	TraesCS2B02G554000	4.19947	1.10762	1.03394	22.7614	12.1088	11.4552	2.11368	15.4418	-2.86521	0.00318071	0.0366744	Chr2B	-	-
TraesCS2B03G1399100	TraesCS2B02G557700	32.5459	22.1524	17.577	94.6874	58.5259	54.6325	24.0918	69.2819	-1.52448	0.000222694	0.00515247	Chr2B	Q9SXA6.1 RecName: Full=Endonuclease 1; Short=AtENDO1; AltName: Full=Bifunctional nuclease I; Short=AtBFN1; AltName: Full=Deoxyribonuclease ENDO1; AltName: Full=Single-stranded-nucleate endonuclease ENDO1; Flags: Pre	-
TraesCS2B03G1399200	TraesCS2B02G557800	32.5459	32.1211	23.7807	61.911	101.916	86.3547	29.4825	83.3938	-1.49989	3.57e-05	0.00123748	Chr2B	P94479.2 RecName: Full=Uncharacterized protein YnbB && PF06838:Methionine gamma-lyase	-
TraesCS2B03G1399400	TraesCS2B02G557900	130.183	156.175	144.752	47.3437	62.5622	76.6618	143.703	62.1892	1.20719	1.17e-05	0.000505321	Chr2B	Q7XA42.2 RecName: Full=Putative disease resistance protein RGA1; AltName: Full=RGA3-blb && PF00931:NB-ARC domain	NB-ARC
TraesCS2B03G1400600	TraesCS2B02G558400	16.7979	11.0762	14.4752	38.2391	65.5894	22.9104	14.1164	42.2463	-1.57521	0.00307193	0.0357512	Chr2B	P26018.1 RecName: Full=Chalcone synthase 1; AltName: Full=Naringenin-chalcone synthase 1 && PF00195:Chalcone and stilbene synthases, N-terminal domain|PF02797:Chalcone and stilbene synthases, C-terminal domain	Chal_sti_synt_N
TraesCS2B03G1423800	TraesCS2B02G568300	38.8451	49.843	64.1045	16.3882	21.1904	25.5539	50.9308	21.0442	1.27463	0.00306882	0.035721	Chr2B	Q9M1V2.1 RecName: Full=Cytosolic sulfotransferase 5; Short=AtSOT5; AltName: Full=Flavonoid 7-sulfotransferase 3a; Short=AtST3a && PF00685:Sulfotransferase domain	Sulfotransfer_1
TraesCS2B03G1453700	TraesCS2B02G581900	5.24933	0	2.06789	27.3137	19.1723	27.3163	2.43907	24.6007	-3.32104	8.78e-05	0.00251214	Chr2B	P28814.1 RecName: Full=Barwin && PF00967:Barwin family	-
TraesCS2B03G1453800	TraesCS2B02G582000	0	0	0	31.866	18.1632	27.3163	0	25.7818	-7.04411	1.69e-07	1.55e-05	Chr2B	P28814.1 RecName: Full=Barwin && PF00967:Barwin family	-
TraesCS2B03G1453900	TraesCS2B02G582100	0	0	0	9.10456	7.06347	2.64351	0	6.27051	-5.00096	0.00483173	0.0489882	Chr2B	P28814.1 RecName: Full=Barwin && PF00967:Barwin family	-
TraesCS2B03G1460500	TraesCS2B02G583700	95.5378	78.6412	59.9687	187.554	177.596	201.788	78.0492	188.979	-1.27678	3.3e-07	2.71e-05	Chr2B	-	-
TraesCS2B03G1487900	TraesCS2B02G594400	2.09973	16.6143	5.16971	237.629	130.17	126.888	7.96126	164.896	-4.39096	3.45e-20	4.71e-17	Chr2B	C4R628.1 RecName: Full=Vacuolar membrane protease; AltName: Full=FXNA-related family protease 1 && PF04389:Peptidase family M28	-
TraesCS2B03G1504000	TraesCS2B02G601300	2.09973	5.53811	0	10.015	4.03627	80.1865	2.54595	31.4126	-3.64463	0.000504683	0.0095688	Chr2B	Q84TG3.1 RecName: Full=E3 ubiquitin-protein ligase PUB23; AltName: Full=Plant U-box protein 23; AltName: Full=U-box domain-containing protein 23 && PF04564:U-box domain	U-box
TraesCS2B03G1508600	TraesCS2B02G603000	26.2467	9.9686	23.7807	56.4483	54.4896	50.2267	19.9986	53.7215	-1.42062	0.00139107	0.020371	Chr2B	Q9SJ54.1 RecName: Full=NDR1/HIN1-like protein 12 && PF03168:Late embryogenesis abundant protein	-
TraesCS2B03G1510100	TraesCS2B02G603600	4.19947	22.1524	19.6449	34.5973	36.3264	166.541	15.3323	79.155	-2.37238	0.000124624	0.00332175	Chr2B	Q9FMS6.1 RecName: Full=Probable CCR4-associated factor 1 homolog 11 && PF04857:CAF1 family ribonuclease	CAF1
TraesCS2B03G1531500	TraesCS2B02G611700	58.7925	26.5829	43.4256	143.852	170.532	89.8794	42.9337	134.755	-1.64598	2.37e-06	0.000138057	Chr2B	Q6YTI3.1 RecName: Full=Thioredoxin-like 4, chloroplastic; AltName: Full=Lilium-type thioredoxin 3; Flags: Precursor && PF00085:Thioredoxin	-
TraesCS2B03G1538300	TraesCS2B02G613900	473.49	438.618	291.572	1688.9	751.755	914.655	401.227	1118.44	-1.47917	0.000456927	0.00884615	Chr2B	Q01548.1 RecName: Full=Peroxidase 2 && PF00141:Peroxidase	-
TraesCS2B03G1542000	TraesCS2B02G615900	62.992	47.6278	28.9504	10.9255	20.1813	15.8611	46.5234	15.656	1.57521	0.00126821	0.0190518	Chr2B	P84516.2 RecName: Full=Cationic peroxidase SPC4; Flags: Precursor && PF00141:Peroxidase	-
TraesCS2B03G1543100	TraesCS2B02G627700	16.7979	12.1838	14.4752	49.1646	47.4262	23.7916	14.4856	40.1275	-1.46632	0.00391238	0.0425538	Chr2B	-	-
TraesCS2B03G1560200	TraesCS2B02G623400	44.0944	25.4753	42.3917	199.39	278.503	213.243	37.3205	230.379	-2.6212	2.15e-20	3.06e-17	Chr2B	Q9ZST1.1 RecName: Full=30S ribosomal protein S17, chloroplastic; AltName: Full=CS17; Flags: Precursor && PF00366:Ribosomal protein S17	-
TraesCS2D03G0018600	TraesCS2D02G010200	66.1416	25.4753	29.9843	111.076	144.297	89.8794	40.5337	115.084	-1.50221	5.78e-05	0.00179267	Chr2D	Q7Y211.2 RecName: Full=Pentatricopeptide repeat-containing protein At3g57430, chloroplastic; AltName: Full=Protein ORGANELLE TRANSCRIPT PROCESSING 84; Flags: Precursor && PF01535:PPR repeat|PF14432:DYW family of nuc	PPR
TraesCS2D03G0019400	TraesCS2D02G010800	100.787	93.0403	132.345	269.495	317.856	295.192	108.724	294.181	-1.43421	3.11e-11	8.54e-09	Chr2D	PF01852:START domain	START
TraesCS2D03G0026900	TraesCS2D02G013900	26.2467	49.843	47.5614	148.404	324.92	244.965	41.217	239.43	-2.53851	7.58e-15	4.94e-12	Chr2D	-	-
TraesCS2D03G0027100	TraesCS2D02G014000	0	0	1.03394	10.015	22.1995	7.04936	0.344648	13.088	-5.09769	0.000622823	0.0111911	Chr2D	-	-
TraesCS2D03G0027200	TraesCS2D02G014100	38.8451	23.2601	51.6971	191.196	498.479	299.598	37.9341	329.758	-3.11513	9.84e-20	1.29e-16	Chr2D	Q6F357.1 RecName: Full=Phospholipase A1-II 7 >A2Y7R2.1 RecName: Full=Phospholipase A1-II 7 && PF01764:Lipase (class 3)	Lipase_3
TraesCS2D03G0028200	TraesCS2D02G014800	125.984	121.838	85.8172	172.987	328.956	311.934	111.213	271.292	-1.28664	1.89e-06	0.000114597	Chr2D	F4I0K2.2 RecName: Full=Fructokinase-like 2, chloroplastic; AltName: Full=pfkB-type carbohydrate kinase family protein 1; Flags: Precursor && PF00294:pfkB family carbohydrate kinase	PfkB
TraesCS2D03G0031600	TraesCS2D02G016700	130.183	137.345	191.279	265.853	358.219	376.26	152.936	333.444	-1.12355	4.79e-07	3.75e-05	Chr2D	Q339K6.1 RecName: Full=Laccase-15; AltName: Full=Benzenediol:oxygen oxidoreductase 15; AltName: Full=Diphenol oxidase 15; AltName: Full=Urishiol oxidase 15; Flags: Precursor && PF00394:Multicopper oxidase|PF07731:Mu	-
TraesCS2D03G0055100	TraesCS2D02G028600	181.627	124.054	362.914	1149	1120.06	1994.09	222.865	1421.05	-2.67239	3.01e-07	2.51e-05	Chr2D	Q84QK0.1 RecName: Full=12-oxophytodienoate reductase 1; AltName: Full=12-oxophytodienoate-10,11-reductase 1; Short=OPDA-reductase 1; Short=OsOPR1 && PF00724:NADH:flavin oxidoreductase / NADH oxidase family	Oxidored_FMN
TraesCS2D03G0062200	TraesCS2D02G033700	0	0	0	30.9555	64.5803	0.88117	0	32.139	-7.35972	0.00274735	0.032981	Chr2D	-	-
TraesCS2D03G0062400	TraesCS2D02G033900	0	0	0	11.8359	18.1632	1.76234	0	10.5872	-5.75384	0.000429041	0.00841371	Chr2D	PF12143:Protein of unknown function (DUF_B2219)	-
TraesCS2D03G0067000	TraesCS2D02G036300	153.28	127.377	127.175	384.212	369.319	223.817	135.944	325.783	-1.25982	1.14e-07	1.11e-05	Chr2D	-	-
TraesCS2D03G0085100	TraesCS2D02G046600	0	0	0	7.28365	5.04534	9.69287	0	7.34062	-5.23235	0.00185592	0.0249754	Chr2D	A3BNA1.1 RecName: Full=Flowering-promoting factor 1-like protein 5; AltName: Full=FPF1-like protein 5 && -	-
TraesCS2D03G0089000	TraesCS2D02G048900	72.4408	57.5964	74.4439	24.5823	31.2811	32.6033	68.1603	29.4889	1.21004	0.000818504	0.0137229	Chr2D	PF12937:F-box-like|PF03478:Protein of unknown function (DUF295)	DUF295
TraesCS2D03G0111800	TraesCS2D02G057900	55.6429	46.5201	27.9165	115.628	148.333	115.433	43.3598	126.465	-1.5445	1.21e-06	7.91e-05	Chr2D	O64750.1 RecName: Full=Protein EMBRYO SAC DEVELOPMENT ARREST 3, chloroplastic; Flags: Precursor && -	-
TraesCS2D03G0118400	TraesCS2D02G061000	0	0	0	39.1496	45.408	10.574	0	31.7106	-7.33827	7.09e-08	7.46e-06	Chr2D	PF01190:Pollen protein Ole e 1 like	-
TraesCS2D03G0118500	TraesCS2D02G061100	0	0	2.06789	35.5078	32.2902	10.574	0.689295	26.124	-5.20938	2.62e-05	0.000971723	Chr2D	PF01190:Pollen protein Ole e 1 like	-
TraesCS2D03G0119200	TraesCS2D02G061300	2.09973	5.53811	17.577	202.121	300.702	50.2267	8.40496	184.35	-4.45216	1.42e-05	0.000592779	Chr2D	PF01190:Pollen protein Ole e 1 like	-
TraesCS2D03G0128700	TraesCS2D02G065100	28.3464	23.2601	7.2376	124.732	208.877	28.1974	19.6147	120.602	-2.62042	0.00397662	0.0430071	Chr2D	P00871.2 RecName: Full=Ribulose bisphosphate carboxylase small chain PWS4.3, chloroplastic; Short=RuBisCO small subunit PWS4.3; Flags: Precursor && PF00101:Ribulose bisphosphate carboxylase, small chain|PF12338:Ribu	-
TraesCS2D03G0128800	TraesCS2D02G065200	13.6483	4.43049	3.10183	61.0005	64.5803	2.64351	7.06019	42.7415	-2.5943	0.00170462	0.0235763	Chr2D	P26667.1 RecName: Full=Ribulose bisphosphate carboxylase small chain PW9, chloroplastic; Short=RuBisCO small subunit PW9; Flags: Precursor && PF00101:Ribulose bisphosphate carboxylase, small chain|PF12338:Ribulose-1	-
TraesCS2D03G0128900	TraesCS2D02G065300	13.6483	4.43049	7.2376	58.2692	114.025	17.6234	8.43878	63.3057	-2.89993	5.1e-06	0.000259921	Chr2D	P00871.2 RecName: Full=Ribulose bisphosphate carboxylase small chain PWS4.3, chloroplastic; Short=RuBisCO small subunit PWS4.3; Flags: Precursor && PF00101:Ribulose bisphosphate carboxylase, small chain|PF12338:Ribu	-
TraesCS2D03G0129100	TraesCS2D02G065400	0	2.21524	0	10.015	41.3718	6.16819	0.738415	19.185	-4.73727	0.00043542	0.00850771	Chr2D	P26667.1 RecName: Full=Ribulose bisphosphate carboxylase small chain PW9, chloroplastic; Short=RuBisCO small subunit PW9; Flags: Precursor && PF00101:Ribulose bisphosphate carboxylase, small chain|PF12338:Ribulose-1	-
TraesCS2D03G0129300	TraesCS2D02G065600	7.34906	8.86098	12.4073	77.3887	169.523	22.9104	9.53912	89.9408	-3.23272	5.42e-08	6.01e-06	Chr2D	P26667.1 RecName: Full=Ribulose bisphosphate carboxylase small chain PW9, chloroplastic; Short=RuBisCO small subunit PW9; Flags: Precursor && PF00101:Ribulose bisphosphate carboxylase, small chain|PF12338:Ribulose-1	-
TraesCS2D03G0134800	TraesCS2D02G069000	0	0	5.16971	54.6273	44.399	82.83	1.72324	60.6188	-5.10653	2.13e-10	4.79e-08	Chr2D	D3UAG6.1 RecName: Full=UDP-glycosyltransferase 88F5; AltName: Full=UDP-glucose:chalcone 2'-O-glucosyltransferase && PF00201:UDP-glucoronosyl and UDP-glucosyl transferase	UDPGT
TraesCS2D03G0135200	TraesCS2D02G069100	0	0	0	8.1941	3.0272	17.6234	0	9.6149	-5.62404	0.000575585	0.0105655	Chr2D	D3UAG7.1 RecName: Full=UDP-glycosyltransferase 88F3; AltName: Full=UDP-glucose:chalcone 2'-O-glucosyltransferase && PF00201:UDP-glucoronosyl and UDP-glucosyl transferase	UDPGT
TraesCS2D03G0136800	TraesCS2D02G069900	17.8477	12.1838	23.7807	243.092	131.179	134.819	17.9374	169.696	-3.23758	3.59e-18	3.85e-15	Chr2D	P22220.1 RecName: Full=Arginine decarboxylase; Short=ADC; Short=ARGDC && PF02784:Pyridoxal-dependent decarboxylase, pyridoxal binding domain	-
TraesCS2D03G0163200	TraesCS2D02G082700	56.6928	60.9192	59.9687	155.688	173.56	213.243	59.1936	180.83	-1.61194	3.64e-10	7.68e-08	Chr2D	P48619.1 RecName: Full=Omega-3 fatty acid desaturase, chloroplastic; Flags: Precursor && PF11960:Domain of unknown function (DUF3474)|PF00487:Fatty acid desaturase	-
TraesCS2D03G0205600	TraesCS2D02G097800	37.7952	18.8296	16.5431	99.2397	74.671	41.415	24.3893	71.7752	-1.55543	0.000550332	0.010234	Chr2D	Q9SG80.1 RecName: Full=Alpha-L-arabinofuranosidase 1; Short=AtASD1; AltName: Full=Beta-D-xylosidase; Flags: Precursor && PF06964:Alpha-L-arabinofuranosidase C-terminal domain	-
TraesCS2D03G0207600	TraesCS2D02G098400	6.2992	9.9686	5.16971	20.03	15.136	46.702	7.14584	27.2894	-1.94196	0.00429494	0.0452976	Chr2D	Q9ZT50.1 RecName: Full=E3 ubiquitin-protein ligase RHA2A; AltName: Full=RING-H2 finger A2a; AltName: Full=RING-H2 zinc finger protein RHA2a && PF13639:Ring finger domain	-
TraesCS2D03G0210800	TraesCS2D02G099800	12.5984	16.6143	18.611	30.045	55.4987	89.8794	15.9412	58.4744	-1.87614	0.00014198	0.00366838	Chr2D	Q700D5.1 RecName: Full=Probable lysophospholipase BODYGUARD 4; Short=AtBDG4; Flags: Precursor && PF00561:alpha/beta hydrolase fold	Abhydrolase_1
TraesCS2D03G0236100	TraesCS2D02G112000	107.086	58.704	108.564	425.183	426.835	288.143	91.4514	380.054	-2.05214	7.79e-16	6.1e-13	Chr2D	PF06596:Photosystem II reaction centre X protein (PsbX)	-
TraesCS2D03G0240500	TraesCS2D02G114800	190.026	135.13	164.397	360.54	369.319	255.539	163.184	328.466	-1.00759	4.06e-06	0.000217566	Chr2D	Q9SW70.1 RecName: Full=Stress-related protein && PF05755:Rubber elongation factor protein (REF)	-
TraesCS2D03G0240900	TraesCS2D02G115200	18.8976	18.8296	8.27154	86.4933	93.8433	24.6728	15.3329	68.3364	-2.15658	4.82e-05	0.00156031	Chr2D	P31093.1 RecName: Full=Photosystem I reaction center subunit N, chloroplastic; Short=PSI-N; Flags: Precursor && PF05479:Photosystem I reaction centre subunit N (PSAN or PSI-N)	-
TraesCS2D03G0248000	TraesCS2D02G118000	216.272	171.681	174.736	357.809	453.071	364.804	187.563	391.895	-1.0619	3.6e-08	4.2e-06	Chr2D	Q0D3S3.1 RecName: Full=Probable GTP-binding protein OBGC1, chloroplastic; Flags: Precursor >A2YPR8.1 RecName: Full=Probable GTP-binding protein OBGC1, chloroplastic; Flags: Precursor && PF09269:Domain of unknown fun	-
TraesCS2D03G0250000	TraesCS2D02G119100	36.7453	13.2915	25.8486	53.7169	55.4987	107.503	25.2951	72.2394	-1.51254	0.000695059	0.0121448	Chr2D	Q9ZQ85.2 RecName: Full=Myb family transcription factor EFM; AltName: Full=Protein EARLY FLOWERING MYB && PF00249:Myb-like DNA-binding domain	Myb_DNA-binding
TraesCS2D03G0257500	TraesCS2D02G122800	2.09973	0	3.10183	12.7464	24.2176	15.8611	1.73385	17.6084	-3.32219	0.000732836	0.0126306	Chr2D	Q9M8K6.1 RecName: Full=Transcription factor MUTE; AltName: Full=Basic helix-loop-helix protein 45; Short=AtbHLH45; Short=bHLH 45; AltName: Full=Transcription factor EN 20; AltName: Full=bHLH transcription factor bHL	-
TraesCS2D03G0286400	TraesCS2D02G136100	2.09973	4.43049	3.10183	15.4777	22.1995	14.0987	3.21068	17.2586	-2.42901	0.00346355	0.0390511	Chr2D	PF03350:Uncharacterized protein family, UPF0114	-
TraesCS2D03G0286500	TraesCS2D02G136200	50.3936	36.5515	37.2219	222.151	265.385	186.808	41.389	224.781	-2.43913	2.21e-19	2.8e-16	Chr2D	B8ANF1.1 RecName: Full=Magnesium-chelatase subunit ChlH, chloroplastic; Short=Mg-chelatase subunit H; AltName: Full=Mg-protoporphyrin IX chelatase subunit ChlH; Flags: Precursor && PF02514:CobN/Magnesium Chelatase|P	-
TraesCS2D03G0317100	TraesCS2D02G150500	7.34906	8.86098	8.27154	40.0601	20.1813	29.0786	8.16053	29.7733	-1.87057	0.00176395	0.0241621	Chr2D	Q9LW57.1 RecName: Full=Probable plastid-lipid-associated protein 6, chloroplastic; AltName: Full=Fibrillin-4; AltName: Full=Fibrillin-6; AltName: Full=Harpin-binding protein 1; Short=HrBP1; AltName: Full=Plastoglobu	-
TraesCS2D03G0340400	TraesCS2D02G161900	2204.72	1369.02	1410.3	3601.76	5094.78	4693.99	1661.35	4463.51	-1.42569	2.66e-14	1.57e-11	Chr2D	Q08935.1 RecName: Full=29 kDa ribonucleoprotein A, chloroplastic; AltName: Full=CP29A; Flags: Precursor && PF00076:RNA recognition motif. (a.k.a. RRM, RBD, or RNP domain)	RRM_1
TraesCS2D03G0388600	TraesCS2D02G185300	57.7426	68.6726	49.6293	156.598	143.288	119.839	58.6815	139.908	-1.25471	5.08e-06	0.000259424	Chr2D	Q59324.1 RecName: Full=2-hydroxy-6-oxo-6-phenylhexa-2,4-dienoate hydrolase; Short=HOPDA hydrolase; AltName: Full=2,6-dioxo-6-phenylhexa-3-enoate hydrolase && PF12146:Serine aminopeptidase, S33	-
TraesCS2D03G0397900	TraesCS2D02G190900	37.7952	37.6592	39.2898	96.5083	112.006	74.8995	38.2481	94.4714	-1.30244	5.93e-05	0.00182986	Chr2D	PF11282:Protein of unknown function (DUF3082)	-
TraesCS2D03G0411500	TraesCS2D02G197300	4.19947	6.64573	4.13577	21.8509	28.2539	15.8611	4.99366	21.9886	-2.1404	0.0026566	0.0321573	Chr2D	Q8LK61.2 RecName: Full=NADP-dependent glyceraldehyde-3-phosphate dehydrogenase; AltName: Full=Glyceraldehyde-3-phosphate dehydrogenase [NADP(+)]; AltName: Full=Non-phosphorylating glyceraldehyde 3-phosphate dehydrog	Aldedh
TraesCS2D03G0416100	TraesCS2D02G199100	13.6483	8.86098	1.03394	81.0306	19.1723	92.5229	7.84773	64.2419	-3.03916	3.66e-06	0.000199445	Chr2D	Q8VZ80.2 RecName: Full=Polyol transporter 5; AltName: Full=Protein POLYOL TRANSPORTER 5; Short=AtPLT5; AltName: Full=Sugar-proton symporter PLT5 && PF00083:Sugar (and other) transporter	Sugar_tr
TraesCS2D03G0417900	TraesCS2D02G199700	118.635	101.901	113.734	204.853	259.33	222.936	111.423	229.04	-1.03801	1.83e-06	0.0001112	Chr2D	Q94ID7.1 RecName: Full=Geranylgeranyl pyrophosphate synthase, chloroplastic; Short=GGPP synthase; Short=GGPS; AltName: Full=(2E,6E)-farnesyl diphosphate synthase; AltName: Full=Dimethylallyltranstransferase; AltName	-
TraesCS2D03G0432500	TraesCS2D02G207100	89.2386	55.3811	44.4595	142.942	157.414	88.9982	63.0264	129.785	-1.04037	0.00162313	0.0227698	Chr2D	-	-
TraesCS2D03G0438600	TraesCS2D02G209900	10.4987	7.75336	3.10183	152.957	240.158	60.8007	7.11795	151.305	-4.41154	6.9e-17	6.25e-14	Chr2D	Q07473.1 RecName: Full=Chlorophyll a-b binding protein CP29.1, chloroplastic; AltName: Full=LHCB4.1; AltName: Full=LHCII protein 4.1; Flags: Precursor && PF00504:Chlorophyll A-B binding protein	-
TraesCS2D03G0447000	TraesCS2D02G213400	6.2992	3.32287	11.3734	33.6869	41.3718	19.3857	6.99848	31.4815	-2.159	0.000763817	0.0130391	Chr2D	Q93VA3.1 RecName: Full=Cytochrome c6, chloroplastic; AltName: Full=Cytochrome c-552; Short=Atc6; AltName: Full=Cytochrome c-553; AltName: Full=Cytochrome c553; AltName: Full=Soluble cytochrome f; Flags: Precursor &&	-
TraesCS2D03G0451200	TraesCS2D02G214700	173.228	86.3946	129.243	474.347	581.223	293.43	129.622	449.667	-1.79248	5.24e-11	1.39e-08	Chr2D	Q7X9A6.1 RecName: Full=Cytochrome b6-f complex iron-sulfur subunit, chloroplastic; AltName: Full=Plastohydroquinone:plastocyanin oxidoreductase iron-sulfur protein; AltName: Full=Rieske iron-sulfur protein; Short=IS	-
TraesCS2D03G0467500	TraesCS2D02G220800	156.43	137.345	159.227	456.138	613.513	273.163	151.001	447.605	-1.56612	8.22e-10	1.54e-07	Chr2D	Q0D5P8.1 RecName: Full=Oxygen-evolving enhancer protein 3, chloroplastic; Short=OEE3; AltName: Full=LP02; Flags: Precursor >P83646.2 RecName: Full=Oxygen-evolving enhancer protein 3, chloroplastic; Short=OEE3; AltNa	-
TraesCS2D03G0476000	TraesCS2D02G224700	27.2965	16.6143	8.27154	70.1051	28.2539	105.74	17.3941	68.0331	-1.97128	0.000194907	0.00465953	Chr2D	Q06398.2 RecName: Full=Probable glutathione S-transferase GSTU6; AltName: Full=28 kDa cold-induced protein && PF13410:Glutathione S-transferase, C-terminal domain|PF13417:Glutathione S-transferase, N-terminal domain	-
TraesCS2D03G0479700	TraesCS2D02G226700	89.2386	43.1973	50.6632	250.375	304.738	189.452	61.033	248.188	-2.02113	5.23e-12	1.7e-09	Chr2D	A2YLX7.1 RecName: Full=Protein LHCP TRANSLOCATION DEFECT; Flags: Precursor >A3BKF2.1 RecName: Full=Protein LHCP TRANSLOCATION DEFECT; Flags: Precursor && -	-
TraesCS2D03G0488900	TraesCS2D02G231200	13.6483	11.0762	6.20366	40.0601	51.4624	24.6728	10.3094	38.7317	-1.90854	0.00058385	0.0106723	Chr2D	PF02190:ATP-dependent protease La (LON) substrate-binding domain	-
TraesCS2D03G0497000	TraesCS2D02G233800	76.6402	66.4573	21.7128	94.6874	115.034	141.868	54.9368	117.196	-1.09515	0.00404216	0.0435336	Chr2D	C0LGQ5.1 RecName: Full=LRR receptor-like serine/threonine-protein kinase GSO1; AltName: Full=Protein GASSHO 1; Flags: Precursor && PF00069:Protein kinase domain|PF08263:Leucine rich repeat N-terminal domain|PF13855:	Pkinase
TraesCS2D03G0522900	TraesCS2D02G238700	86.089	48.7354	65.1384	162.972	144.297	119.839	66.6543	142.369	-1.0928	0.000138741	0.00359938	Chr2D	Q8LCA1.2 RecName: Full=Protein CURVATURE THYLAKOID 1B, chloroplastic; AltName: Full=Photosystem I protein P; AltName: Full=Thylakoid membrane phosphoprotein 14 kDa; Flags: Precursor && PF14159:CAAD domains of cyanob	-
TraesCS2D03G0569700	TraesCS2D02G248400	550.13	593.686	674.131	1465.83	1808.25	984.267	605.982	1419.45	-1.22745	4.08e-10	8.51e-08	Chr2D	P27665.1 RecName: Full=Oxygen-evolving enhancer protein 1, chloroplastic; Short=OEE1; AltName: Full=33 kDa subunit of oxygen evolving system of photosystem II; AltName: Full=33 kDa thylakoid membrane protein; AltNam	-
TraesCS2D03G0578400	TraesCS2D02G251000	477.689	323.426	339.133	809.395	1061.54	868.834	380.083	913.256	-1.26397	6.18e-12	1.97e-09	Chr2D	Q39061.1 RecName: Full=RNA-binding protein CP33, chloroplastic; AltName: Full=Protein PIGMENT DEFECTIVE 322; Flags: Precursor && PF00076:RNA recognition motif. (a.k.a. RRM, RBD, or RNP domain)	RRM_1
TraesCS2D03G0578800	TraesCS2D02G251300	428.345	382.13	504.564	946.874	1019.16	889.101	438.346	951.711	-1.11758	5.23e-13	2.19e-10	Chr2D	P38758.2 RecName: Full=Putative oxidoreductase TDA3; AltName: Full=Batten disease protein 3; AltName: Full=Topoisomerase I damage affected protein 3 && PF01266:FAD dependent oxidoreductase	DAO
TraesCS2D03G0584300	TraesCS2D02G253200	1.04987	2.21524	1.03394	38.2391	59.535	23.7916	1.43302	40.5219	-4.83115	7.87e-08	8.09e-06	Chr2D	P36886.1 RecName: Full=Photosystem I reaction center subunit psaK, chloroplastic; AltName: Full=Light-harvesting complex I 7 kDa protein; AltName: Full=PSI-K; AltName: Full=Photosystem I subunit X; Flags: Precursor	-
TraesCS2D03G0588300	TraesCS2D02G255100	457.742	326.749	382.559	1159.01	1255.28	594.79	389.016	1003.03	-1.36573	5.74e-09	8.5e-07	Chr2D	Q00434.1 RecName: Full=Oxygen-evolving enhancer protein 2, chloroplastic; Short=OEE2; AltName: Full=23 kDa subunit of oxygen evolving system of photosystem II; AltName: Full=23 kDa thylakoid membrane protein; AltNam	-
TraesCS2D03G0590800	TraesCS2D02G256100	92.3882	74.2107	110.632	32.7764	58.5259	46.702	92.4103	46.0014	1.01059	0.00247593	0.0306194	Chr2D	Q9T068.1 RecName: Full=EPIDERMAL PATTERNING FACTOR-like protein 2; Short=EPF-like protein 2; Contains: RecName: Full=MEPFL2; Flags: Precursor && PF17181:Epidermal patterning factor proteins	-
TraesCS2D03G0594100	TraesCS2D02G257100	6.2992	3.32287	7.2376	21.8509	16.1451	28.1974	5.61989	22.0645	-1.9702	0.00477101	0.0485772	Chr2D	-	-
TraesCS2D03G0595400	TraesCS2D02G257700	3.1496	24.3677	16.5431	31.866	45.408	123.364	14.6868	66.8793	-2.19283	0.000271436	0.0059814	Chr2D	PF14009:Domain of unknown function (DUF4228)	-
TraesCS2D03G0609300	TraesCS2D02G264200	11.5485	14.3991	20.6789	100.15	60.544	106.622	15.5422	89.1053	-2.5195	1.32e-09	2.36e-07	Chr2D	P23586.2 RecName: Full=Sugar transport protein 1; AltName: Full=Glucose transporter; AltName: Full=Hexose transporter 1 && PF00083:Sugar (and other) transporter	Sugar_tr
TraesCS2D03G0620700	TraesCS2D02G269200	19.9475	18.8296	46.5274	76.4783	43.3899	97.8099	28.4348	72.5594	-1.3508	0.00249358	0.0307987	Chr2D	Q0JEE2.1 RecName: Full=WRKY transcription factor WRKY51; Short=OsWRKY51 && PF10533:Plant zinc cluster domain|PF03106:WRKY DNA -binding domain	WRKY
TraesCS2D03G0628800	TraesCS2D02G271800	38.8451	11.0762	15.5091	59.1796	86.7798	52.8702	21.8101	66.2765	-1.5987	0.000664576	0.0117535	Chr2D	O23342.1 RecName: Full=Preprotein translocase subunit SECE1; Flags: Precursor && -	-
TraesCS2D03G0652100	TraesCS2D02G281100	135.433	275.798	217.128	439.75	594.341	233.51	209.453	422.534	-1.01209	0.000687885	0.0120527	Chr2D	Q9FYF9.1 RecName: Full=F-box protein At1g67340 && PF01753:MYND finger	zf-MYND
TraesCS2D03G0673900	TraesCS2D02G290400	12.5984	15.5067	20.6789	70.1051	48.4352	25.5539	16.2613	48.0314	-1.56061	0.00196751	0.0259856	Chr2D	PF04949:Transcriptional activator	-
TraesCS2D03G0677900	TraesCS2D02G292400	55.6429	35.4439	74.4439	162.061	233.095	226.461	55.1769	207.205	-1.90521	6.34e-11	1.61e-08	Chr2D	P27788.1 RecName: Full=Ferredoxin-3, chloroplastic; AltName: Full=Ferredoxin III; Short=Fd III; Flags: Precursor && PF00111:2Fe-2S iron-sulfur cluster binding domain	Fer2
TraesCS2D03G0681400	TraesCS2D02G294300	2.09973	9.9686	1.03394	37.3287	74.671	15.8611	4.36743	42.6202	-3.30132	1.5e-05	0.000622163	Chr2D	Q949Q5.1 RecName: Full=Photosystem I subunit O; Short=PSI-O; Flags: Precursor && -	-
TraesCS2D03G0683400	TraesCS2D02G295200	8.39893	9.9686	13.4413	22.7614	50.4534	30.841	10.6029	34.6852	-1.70507	0.00245968	0.0304685	Chr2D	PF06916:Protein of unknown function (DUF1279)	-
TraesCS2D03G0684200	TraesCS2D02G295700	82.9394	83.0717	102.36	244.002	224.013	107.503	89.4572	191.839	-1.09894	0.000273715	0.0060175	Chr2D	Q9SJ54.1 RecName: Full=NDR1/HIN1-like protein 12 && PF03168:Late embryogenesis abundant protein	-
TraesCS2D03G0692500	TraesCS2D02G299400	45.1443	34.3363	27.9165	80.1201	63.5712	98.6911	35.799	80.7941	-1.17648	0.000927664	0.0150759	Chr2D	-	-
TraesCS2D03G0693300	TraesCS2D02G300100	194.225	110.762	114.768	425.183	247.221	184.165	139.918	285.523	-1.02863	0.000667297	0.0117862	Chr2D	PF02496:ABA/WDS induced protein	-
TraesCS2D03G0695300	TraesCS2D02G301000	0	3.32287	0	12.7464	12.1088	14.0987	1.10762	12.9846	-3.59055	0.00303099	0.0354166	Chr2D	Q339N5.2 RecName: Full=Cellulose synthase-like protein H1; AltName: Full=OsCslH1 && PF03552:Cellulose synthase	-
TraesCS2D03G0705400	TraesCS2D02G305600	44.0944	34.3363	46.5274	107.434	199.795	133.057	41.6527	146.762	-1.81337	1.32e-08	1.74e-06	Chr2D	-	-
TraesCS2D03G0714700	TraesCS2D02G310000	47.244	89.7174	36.188	103.792	142.278	112.79	57.7165	119.62	-1.05391	0.00203146	0.0265437	Chr2D	Q9C667.1 RecName: Full=Chaperonin 60 subunit beta 4, chloroplastic; Short=CPN-60 beta 4; Flags: Precursor && PF00118:TCP-1/cpn60 chaperonin family|PF00067:Cytochrome P450	p450
TraesCS2D03G0717500	TraesCS2D02G311500	292.913	198.264	170.601	448.855	512.606	401.814	220.593	454.425	-1.04199	1.19e-06	7.84e-05	Chr2D	PF05899:Protein of unknown function (DUF861)	Cupin_3
TraesCS2D03G0718300	TraesCS2D02G312000	102.887	55.3811	67.2063	228.524	336.019	241.441	75.1581	268.661	-1.83523	8.16e-12	2.5e-09	Chr2D	P23902.1 RecName: Full=3-oxoacyl-[acyl-carrier-protein] synthase I, chloroplastic; AltName: Full=Beta-ketoacyl-ACP synthase I; Short=KAS I; Flags: Precursor && PF02801:Beta-ketoacyl synthase, C-terminal domain|PF001	ketoacyl-synt
TraesCS2D03G0720400	TraesCS2D02G313400	54.593	64.2421	54.799	183.912	152.369	389.477	57.878	241.919	-2.06566	3.45e-10	7.28e-08	Chr2D	Q7XV13.2 RecName: Full=Putative lipoxygenase 5 && PF01477:PLAT/LH2 domain|PF00305:Lipoxygenase	Lipoxygenase
TraesCS2D03G0725500	TraesCS2D02G316200	107.086	90.825	97.1906	341.421	392.527	187.689	98.3673	307.212	-1.64135	9.23e-10	1.7e-07	Chr2D	-	-
TraesCS2D03G0729500	TraesCS2D02G317800	54.593	81.9641	70.3081	225.793	66.5984	240.559	68.9551	177.65	-1.36795	0.000316772	0.00671228	Chr2D	Q05736.1 RecName: Full=Pathogenesis-related protein 1; Short=AOPR1 && PF00407:Pathogenesis-related protein Bet v 1 family	-
TraesCS2D03G0738900	TraesCS2D02G320900	35.6955	34.3363	56.8669	283.152	361.246	182.402	42.2995	275.6	-2.70019	5.6e-19	6.67e-16	Chr2D	P27525.1 RecName: Full=Chlorophyll a-b binding protein CP24 10B, chloroplastic; Short=CAB-10B; Short=LHCP; Flags: Precursor && PF00504:Chlorophyll A-B binding protein	-
TraesCS2D03G0743200	TraesCS2D02G322900	22.0472	42.0897	19.6449	70.1051	102.925	37.8903	27.9273	70.3068	-1.33265	0.00315189	0.0364083	Chr2D	P09315.1 RecName: Full=Glyceraldehyde-3-phosphate dehydrogenase A, chloroplastic; AltName: Full=NADP-dependent glyceraldehydephosphate dehydrogenase subunit A; Flags: Precursor && PF00044:Glyceraldehyde 3-phosphate	-
TraesCS2D03G0747300	TraesCS2D02G324900	452.492	307.919	359.812	734.738	903.115	665.283	373.408	767.712	-1.03877	1.76e-08	2.25e-06	Chr2D	O48609.1 RecName: Full=30S ribosomal protein 3, chloroplastic; AltName: Full=Plastid-specific 30S ribosomal protein 3; Short=PSRP-3; Flags: Precursor && PF04839:Plastid and cyanobacterial ribosomal protein (PSRP-3 /	-
TraesCS2D03G0755100	TraesCS2D02G328700	50.3936	49.843	54.799	111.076	81.7344	123.364	51.6785	105.391	-1.02979	0.000640111	0.0114222	Chr2D	Q9M895.1 RecName: Full=Probable inactive ATP-dependent zinc metalloprotease FTSHI 3, chloroplastic; Short=AtFTSHI3; AltName: Full=Protein FTSH INACTIVE PROTEASE 3; Flags: Precursor && PF00004:ATPase family associate	AAA
TraesCS2D03G0778700	TraesCS2D02G339600	23.0971	34.3363	11.3734	80.1201	90.8161	75.7806	22.9356	82.2389	-1.84721	4.74e-06	0.000247233	Chr2D	Q7XUP7.2 RecName: Full=Peptide methionine sulfoxide reductase A2-1; Short=OsMSRA2.1; AltName: Full=Peptide-methionine (S)-S-oxide reductase; Short=Peptide Met(O) reductase; AltName: Full=Protein-methionine-S-oxide r	PMSR
TraesCS2D03G0794800	TraesCS2D02G346900	18.8976	12.1838	8.27154	88.3142	112.006	15.8611	13.1177	72.0606	-2.45558	3.5e-05	0.00122043	Chr2D	P0DKC4.1 RecName: Full=Phosphoglycolate phosphatase 1B, chloroplastic; Flags: Precursor >P0DKC3.1 RecName: Full=Phosphoglycolate phosphatase 1A, chloroplastic; Flags: Precursor && PF13242:HAD-hyrolase-like|PF13344:H	-
TraesCS2D03G0799200	TraesCS2D02G349600	12.5984	14.3991	11.3734	29.1346	43.3899	32.6033	12.7903	35.0426	-1.45345	0.00448669	0.0465525	Chr2D	Q680K2.1 RecName: Full=Haloacid dehalogenase-like hydrolase domain-containing protein At4g39970; Flags: Precursor && PF13419:Haloacid dehalogenase-like hydrolase	-
TraesCS2D03G0816000	TraesCS2D02G355900	5.24933	2.21524	1.03394	3.64182	16.1451	47.5832	2.83284	22.4567	-2.98889	0.00218534	0.0279726	Chr2D	Q9SSD1.1 RecName: Full=Protein TOO MANY MOUTHS; AltName: Full=Receptor-like protein 17; Short=AtRLP17; Flags: Precursor && PF13855:Leucine rich repeat	-
TraesCS2D03G0837100	TraesCS2D02G364700	0	4.43049	29.9843	0	0	0.88117	11.4716	0.293723	5.10454	0.00347453	0.0391179	Chr2D	Q7XU38.3 RecName: Full=Cytochrome P450 87A3 && PF00067:Cytochrome P450	p450
TraesCS2D03G0851100	TraesCS2D02G372000	41.9947	29.9058	21.7128	158.419	118.061	220.293	31.2044	165.591	-2.40982	1.04e-12	3.92e-10	Chr2D	Q8L5A7.1 RecName: Full=Cytosolic sulfotransferase 15; Short=AtSOT15; AltName: Full=Sulfotransferase 2a; Short=AtST2a && PF00685:Sulfotransferase domain	Sulfotransfer_1
TraesCS2D03G0857400	TraesCS2D02G374500	77.6901	38.7668	24.8146	107.434	94.8523	103.097	47.0905	101.794	-1.11226	0.00299468	0.0351289	Chr2D	Q9SCP6.1 RecName: Full=UDP-glycosyltransferase 73D1 && PF00201:UDP-glucoronosyl and UDP-glucosyl transferase	UDPGT
TraesCS2D03G0860200	TraesCS2D02G376100	117.585	77.5336	153.024	344.152	253.276	248.49	116.047	281.973	-1.27911	6.5e-07	4.79e-05	Chr2D	Q7XUA6.1 RecName: Full=Probable aquaporin PIP2-3; AltName: Full=OsPIP2;3; AltName: Full=Plasma membrane intrinsic protein 2-3 && PF00230:Major intrinsic protein	-
TraesCS2D03G0866000	TraesCS2D02G379000	12.5984	14.3991	3.10183	35.5078	55.4987	47.5832	10.0331	46.1966	-2.20856	5.8e-05	0.00179595	Chr2D	Q8RXU4.1 RecName: Full=Probable low-specificity L-threonine aldolase 1; AltName: Full=Threonine aldolase 1 && PF01212:Beta-eliminating lyase	Beta_elim_lyase
TraesCS2D03G0869000	TraesCS2D02G380900	10.4987	24.3677	10.3394	45.5228	72.6528	35.2468	15.0686	51.1408	-1.76607	0.000489119	0.00933718	Chr2D	PF01471:Putative peptidoglycan binding domain	PG_binding_1
TraesCS2D03G0870100	TraesCS2D02G381400	155.38	91.9327	123.039	298.629	227.04	237.916	123.451	254.529	-1.04301	1.27e-05	0.000540157	Chr2D	Q8LDV3.2 RecName: Full=Uncharacterized protein At4g13200, chloroplastic; Flags: Precursor && -	-
TraesCS2D03G0872500	TraesCS2D02G382600	47.244	58.704	50.6632	250.375	125.124	120.72	52.2037	165.407	-1.66529	3.42e-07	2.8e-05	Chr2D	P49175.1 RecName: Full=Beta-fructofuranosidase 1; AltName: Full=Invertase 1; AltName: Full=Sucrose 1; Flags: Precursor && PF11837:Domain of unknown function (DUF3357)|PF08244:Glycosyl hydrolases family 32 C terminal	-
TraesCS2D03G0875000	TraesCS2D02G383800	334.907	373.269	271.927	614.558	877.889	570.998	326.701	687.815	-1.07377	5.97e-08	6.44e-06	Chr2D	I1K0K6.1 RecName: Full=Elongation factor G-2, chloroplastic; Short=cEF-G 2; Flags: Precursor && PF00009:Elongation factor Tu GTP binding domain|PF00679:Elongation factor G C-terminus|PF03144:Elongation factor Tu dom	GTP_EFTU
TraesCS2D03G0877800	TraesCS2D02G385300	15.748	7.75336	22.7467	41.881	87.7889	36.128	15.416	55.2659	-1.8333	0.000399285	0.00797819	Chr2D	Q7FB12.1 RecName: Full=NAD(P)H-quinone oxidoreductase subunit M, chloroplastic; AltName: Full=NAD(P)H dehydrogenase subunit M; Short=NDH subunit M; Short=NDH-M; AltName: Full=NADH-plastoquinone oxidoreductase subuni	-
TraesCS2D03G0895800	TraesCS2D02G393700	15.748	47.6278	31.0183	71.0155	73.6619	66.9689	31.4647	70.5488	-1.16807	0.00385785	0.042144	Chr2D	P92949.2 RecName: Full=Ferric reduction oxidase 2; Short=AtFRO2; AltName: Full=Ferric-chelate reductase 2; AltName: Full=Protein FERRIC CHELATE REDUCTASE DEFECTIVE 1 && PF08030:Ferric reductase NAD binding domain|PF	FAD_binding_8
TraesCS2D03G0896000	TraesCS2D02G393900	7.34906	0	7.2376	15.4777	53.4806	49.3455	4.86222	39.4346	-3.00551	4.11e-05	0.00138172	Chr2D	B3SGL0.1 RecName: Full=Beta-carotene 3-hydroxylase, chloroplastic; Short=GenCHYB; Flags: Precursor && PF04116:Fatty acid hydroxylase superfamily	-
TraesCS2D03G0897700	TraesCS2D02G394400	60.8922	43.1973	32.0522	81.0306	108.979	88.117	45.3806	92.7089	-1.02957	0.00214168	0.0275529	Chr2D	Q8VZN1.1 RecName: Full=Transcription repressor OFP5; AltName: Full=Ovate family protein 5; Short=AtOFP5 && PF04844:Transcriptional repressor, ovate	-
TraesCS2D03G0909600	TraesCS2D02G400500	32.5459	42.0897	42.3917	63.7319	92.8342	82.83	39.0091	79.7987	-1.03179	0.00231204	0.0291344	Chr2D	Q9FFN1.1 RecName: Full=Pentatricopeptide repeat-containing protein At5g03800; AltName: Full=Protein EMBRYO DEFECTIVE 175 && PF13041:PPR repeat family|PF14432:DYW family of nucleic acid deaminases	-
TraesCS2D03G0927700	TraesCS2D02G409900	184.776	213.771	164.397	429.735	772.946	673.214	187.648	625.298	-1.73672	3.1e-15	2.16e-12	Chr2D	Q8LPF3.1 RecName: Full=Probable pectinesterase 68; Short=PE 68; AltName: Full=Pectin methylesterase 68; Short=AtPME68; Flags: Precursor && PF01095:Pectinesterase	-
TraesCS2D03G0935500	TraesCS2D02G414600	31.496	43.1973	41.3577	95.5979	110.997	72.256	38.6837	92.9504	-1.26366	0.000148362	0.00378699	Chr2D	O80337.2 RecName: Full=Ethylene-responsive transcription factor 1A; Short=AtERF1A; AltName: Full=Ethylene-responsive element-binding factor 1A; Short=EREBP-1A && PF00847:AP2 domain	AP2
TraesCS2D03G0935900	TraesCS2D02G415000	0	2.21524	0	17.2987	11.0997	19.3857	0.738415	15.928	-4.47924	0.000534666	0.0100195	Chr2D	P40287.1 RecName: Full=Histone H4 && -	-
TraesCS2D03G0956200	TraesCS2D02G423700	5.24933	8.86098	4.13577	38.2391	17.1541	28.1974	6.08203	27.8636	-2.20479	0.000905007	0.0148147	Chr2D	Q8L7E3.2 RecName: Full=Vacuolar-sorting receptor 7; Short=AtVSR7; AltName: Full=BP80-like protein f; Short=AtBP80f; AltName: Full=Epidermal growth factor receptor-like protein 3; Short=AtELP3; Flags: Precursor && PF	-
TraesCS2D03G0977900	TraesCS2D02G434600	244.619	211.556	216.094	446.123	544.896	482	224.09	491.007	-1.13087	5.59e-11	1.47e-08	Chr2D	Q9C7Y2.1 RecName: Full=Multiple organellar RNA editing factor 5, mitochondrial; AltName: Full=RNA editing-interacting protein 5; Flags: Precursor && -	-
TraesCS2D03G0989300	TraesCS2D02G441000	0	0	1.03394	15.4777	13.1179	6.16819	0.344648	11.5879	-4.92518	0.00107567	0.016853	Chr2D	-	-
TraesCS2D03G1002600	TraesCS2D02G447500	51.4435	73.1031	36.188	92.8665	154.387	105.74	53.5782	117.665	-1.13584	0.000662452	0.0117309	Chr2D	P19684.1 RecName: Full=33 kDa ribonucleoprotein, chloroplastic; Flags: Precursor && PF00076:RNA recognition motif. (a.k.a. RRM, RBD, or RNP domain)	RRM_1
TraesCS2D03G1006500	TraesCS2D02G448900	43.0445	33.2287	48.5953	89.2247	97.8795	82.83	41.6228	89.9781	-1.10928	0.000507854	0.00962108	Chr2D	O22812.2 RecName: Full=AT-hook motif nuclear-localized protein 10; AltName: Full=AT-hook protein 1 && PF03479:Plants and Prokaryotes Conserved (PCC) domain	-
TraesCS2D03G1007300	TraesCS2D02G449400	43.0445	50.9506	41.3577	124.732	81.7344	66.9689	45.1176	91.1453	-1.01566	0.00295472	0.034792	Chr2D	Q6RYA0.1 RecName: Full=Salicylic acid-binding protein 2; Short=NtSABP2; AltName: Full=Methyl salicylate esterase && PF12697:Alpha/beta hydrolase family	-
TraesCS2D03G1018400	TraesCS2D02G455200	95.5378	62.0269	77.5457	194.838	172.551	111.909	78.3701	159.766	-1.02554	0.000363651	0.00741932	Chr2D	PF04570:zinc-finger of the FCS-type, C2-C2	-
TraesCS2D03G1019300	TraesCS2D02G455800	24.1469	14.3991	20.6789	50.9855	51.4624	42.2962	19.7416	48.248	-1.28578	0.00300806	0.0352372	Chr2D	Q9LM69.1 RecName: Full=RING-H2 finger protein ATL80; AltName: Full=RING-type E3 ubiquitin transferase ATL80 && PF13639:Ring finger domain	-
TraesCS2D03G1040600	TraesCS2D02G466200	0	0	0	19.1196	5.04534	22.9104	0	15.6918	-6.32999	1.96e-05	0.000765208	Chr2D	-	-
TraesCS2D03G1042400	TraesCS2D02G467100	9.4488	9.9686	16.5431	33.6869	50.4534	34.3656	11.9868	39.502	-1.7153	0.000889713	0.0146193	Chr2D	PF00170:bZIP transcription factor	bZIP_1
TraesCS2D03G1080100	TraesCS2D02G484000	556.429	567.103	388.762	843.992	722.492	1487.42	504.098	1017.97	-1.01467	1.77e-05	0.000704873	Chr2D	Q8LDW9.2 RecName: Full=Xyloglucan endotransglucosylase/hydrolase protein 9; Short=At-XTH9; Short=XTH-9; Flags: Precursor && PF06955:Xyloglucan endo-transglycosylase (XET) C-terminus	-
TraesCS2D03G1179500	TraesCS2D02G529000	68.2413	22.1524	31.0183	88.3142	108.979	105.74	40.4707	101.011	-1.31696	0.000596536	0.0108332	Chr2D	A0A0P0WFC8.1 RecName: Full=Transcription factor TGAL6; AltName: Full=bZIP transcription factor 37; Short=OsbZIP37 && PF00170:bZIP transcription factor|PF14144:Seed dormancy control	bZIP_1
TraesCS2D03G1207500	TraesCS2D02G544100	32.5459	38.7668	58.9347	104.702	102.925	95.1664	43.4158	100.931	-1.21523	0.000163129	0.00407735	Chr2D	-	-
TraesCS2D03G1257100	TraesCS2D02G563600	3632.54	2423.48	3401.67	8078.47	14113.8	7024.69	3152.56	9739	-1.6272	9.96e-06	0.000445406	Chr2D	P13653.1 RecName: Full=Protochlorophyllide reductase A, chloroplastic; Short=PCR A; AltName: Full=NADPH-protochlorophyllide oxidoreductase A; Short=POR A; Flags: Precursor && PF00106:short chain dehydrogenase	adh_short
TraesCS2D03G1262100	TraesCS2D02G564900	12.5984	19.9372	6.20366	60.0901	51.4624	33.4845	12.9131	48.3457	-1.9102	0.000219147	0.00509576	Chr2D	Q2UXF7.1 RecName: Full=Fructan 6-exohydrolase; Flags: Precursor && PF08244:Glycosyl hydrolases family 32 C terminal|PF00251:Glycosyl hydrolases family 32 N-terminal domain	-
TraesCS2D03G1268900	TraesCS2D02G594400	1033.07	755.399	1040.15	597.259	336.019	409.744	942.871	447.674	1.07408	2.23e-07	1.94e-05	Chr2D	Q1XH04.1 RecName: Full=4-hydroxy-7-methoxy-3-oxo-3,4-dihydro-2H-1,4-benzoxazin-2-yl glucoside beta-D-glucosidase 1c, chloroplastic; AltName: Full=Beta-glucosidase 1c; Short=Taglu1c; Flags: Precursor && PF00232:Glyco	Glyco_hydro_1
TraesCS2D03G1330600	TraesCS2D02G572300	4.19947	5.53811	11.3734	30.9555	33.2992	22.0293	7.03698	28.7613	-2.02512	0.00135491	0.0199671	Chr2D	Q9TJN6.1 RecName: Full=30S ribosomal protein S17, chloroplastic; Flags: Precursor && PF00366:Ribosomal protein S17	-
TraesCS3A03G0014600	TraesCS3A02G005900	6.2992	3.32287	3.10183	34.5973	40.3627	17.6234	4.2413	30.8611	-2.85853	4.52e-05	0.00148916	Chr3A	F4HTT6.1 RecName: Full=Peptidyl-prolyl cis-trans isomerase CYP26-2, chloroplastic; Short=PPIase CYP26-2; AltName: Full=Cyclophilin of 26 kDa 2; AltName: Full=Cyclophilin-26-2; Flags: Precursor && PF00160:Cyclophilin	Pro_isomerase
TraesCS3A03G0048700	TraesCS3A02G024300	6.2992	2.21524	6.20366	17.2987	27.2448	29.9598	4.90603	24.8344	-2.33173	0.000935993	0.0151794	Chr3A	-	-
TraesCS3A03G0069400	TraesCS3A02G032700	25.1968	34.3363	63.0705	4.55228	4.03627	19.3857	40.8679	9.32476	2.11919	0.000899537	0.0147529	Chr3A	Q53QK0.1 RecName: Full=Flavonoid O-methyltransferase-like protein Os11g0303600 && PF00891:O-methyltransferase domain	-
TraesCS3A03G0077400	TraesCS3A02G038200	27.2965	42.0897	45.4935	132.927	76.6891	59.9196	38.2932	89.8451	-1.23089	0.00132605	0.0196383	Chr3A	A3DH97.1 RecName: Full=Anti-sigma-I factor RsgI6; AltName: Full=Endo-1,4-beta-xylanase && PF00331:Glycosyl hydrolase family 10|PF02018:Carbohydrate binding domain	-
TraesCS3A03G0089600	TraesCS3A02G044000	0	0	1.03394	18.2091	27.2448	7.93053	0.344648	17.7948	-5.54188	0.000101626	0.00283591	Chr3A	Q9C9G4.1 RecName: Full=Endonuclease 2; Short=AtENDO2; AltName: Full=Deoxyribonuclease ENDO2; AltName: Full=Single-stranded-nucleate endonuclease ENDO2; Flags: Precursor && PF02265:S1/P1 Nuclease	-
TraesCS3A03G0089700	TraesCS3A02G044100	6.2992	2.21524	2.06789	23.6718	21.1904	29.0786	3.52744	24.647	-2.80243	0.000204195	0.00482369	Chr3A	Q9C9G4.1 RecName: Full=Endonuclease 2; Short=AtENDO2; AltName: Full=Deoxyribonuclease ENDO2; AltName: Full=Single-stranded-nucleate endonuclease ENDO2; Flags: Precursor && PF02265:S1/P1 Nuclease	-
TraesCS3A03G0103400	TraesCS3A02G051200	12.5984	7.75336	23.7807	68.2842	47.4262	40.5338	14.7108	52.0814	-1.81816	0.000252847	0.00567869	Chr3A	Q6DBN4.1 RecName: Full=Reticulon-like protein B6; Short=AtRTNLB6 && PF02453:Reticulon	-
TraesCS3A03G0107800	TraesCS3A02G052700	16.7979	7.75336	7.2376	183.002	274.466	60.8007	10.5963	172.756	-4.02346	7.48e-16	5.93e-13	Chr3A	P23993.1 RecName: Full=Photosystem I reaction center subunit XI, chloroplastic; Short=PSI-L; AltName: Full=PSI subunit V; Flags: Precursor && PF02605:Photosystem I reaction centre subunit XI	-
TraesCS3A03G0115600	TraesCS3A02G055300	188.976	242.569	169.567	349.615	520.679	412.388	200.371	427.56	-1.09367	2.01e-07	1.77e-05	Chr3A	B8AD72.1 RecName: Full=Probable zinc metalloprotease EGY2, chloroplastic; AltName: Full=Protein ETHYLENE-DEPENDENT GRAVITROPISM-DEFICIENT AND YELLOW-GREEN 2; Flags: Precursor && -	-
TraesCS3A03G0128200	TraesCS3A02G059600	345.406	239.246	261.588	602.722	879.907	846.804	282.08	776.478	-1.46015	1.03e-13	5.34e-11	Chr3A	Q8W487.1 RecName: Full=Uncharacterized protein At2g39795, mitochondrial; Flags: Precursor && PF02330:Mitochondrial glycoprotein	-
TraesCS3A03G0129600	TraesCS3A02G060300	50.3936	22.1524	44.4595	133.837	194.75	101.335	39.0019	143.307	-1.87232	1.12e-07	1.1e-05	Chr3A	O22160.2 RecName: Full=Thylakoid lumenal 15 kDa protein 1, chloroplastic; AltName: Full=p15; Flags: Precursor && PF00805:Pentapeptide repeats (8 copies)	Pentapeptide
TraesCS3A03G0161200	TraesCS3A02G073200	25.1968	14.3991	8.27154	69.1946	83.7526	48.4644	15.9558	67.1372	-2.07158	7.61e-06	0.000360633	Chr3A	PF14389:Leucine-zipper of ternary complex factor MIP1|PF04784:Protein of unknown function, DUF547	-
TraesCS3A03G0187800	TraesCS3A02G084400	11.5485	15.5067	9.30548	45.5228	82.7435	33.4845	12.1202	53.9169	-2.15311	2.59e-05	0.000961919	Chr3A	B8BKI7.1 RecName: Full=Probable bifunctional methylthioribulose-1-phosphate dehydratase/enolase-phosphatase E1; Includes: RecName: Full=Methylthioribulose-1-phosphate dehydratase; Short=MTRu-1-P dehydratase; Include	Hydrolase
TraesCS3A03G0194100	TraesCS3A02G087700	90.2885	75.3183	75.4778	314.107	257.312	96.9287	80.3616	222.783	-1.47002	1.78e-05	0.00070574	Chr3A	Q8L5Z1.1 RecName: Full=GDSL esterase/lipase At1g33811; AltName: Full=Extracellular lipase At1g33811; Flags: Precursor && PF00657:GDSL-like Lipase/Acylhydrolase	Lipase_GDSL
TraesCS3A03G0205100	TraesCS3A02G092800	25.1968	31.0134	5.16971	89.2247	37.3355	73.1371	20.46	66.5658	-1.70839	0.00108219	0.0169057	Chr3A	Q5VQG4.1 RecName: Full=Galactinol--sucrose galactosyltransferase; AltName: Full=Raffinose synthase && PF05691:Raffinose synthase or seed imbibition protein Sip1	-
TraesCS3A03G0206900	TraesCS3A02G093600	78.74	59.8116	95.1227	20.03	34.3083	15.8611	77.8914	23.3998	1.7448	1.34e-05	0.000566069	Chr3A	Q76BW5.1 RecName: Full=Xyloglucan endotransglycosylase/hydrolase protein 8; AltName: Full=End-xyloglucan transferase; AltName: Full=OsXRT5; AltName: Full=OsXTH8; Flags: Precursor && PF06955:Xyloglucan endo-transglyc	-
TraesCS3A03G0226600	TraesCS3A02G103500	0	0	5.16971	22.7614	13.1179	16.7422	1.72324	17.5405	-3.32584	0.0014544	0.0210159	Chr3A	Q9SN45.2 RecName: Full=Protein DOG1-like 2 && PF14144:Seed dormancy control	-
TraesCS3A03G0234800	TraesCS3A02G107200	206.824	284.659	237.807	635.498	501.506	364.804	243.096	500.603	-1.04247	1.73e-06	0.000106568	Chr3A	Q9FU27.1 RecName: Full=Zinc finger CCCH domain-containing protein 2; Short=OsC3H2; AltName: Full=Protein DELAY OF THE ONSET OF SENESCENCE; Short=OsDOS && PF00642:Zinc finger C-x8-C-x5-C-x3-H type (and similar)	zf-CCCH
TraesCS3A03G0240500	TraesCS3A02G110100	9168.48	8527.59	14573.4	4219.05	6556.92	3935.31	10756.5	4903.76	1.1333	0.00139378	0.0203978	Chr3A	Q9S728.1 RecName: Full=Protodermal factor 1; Flags: Precursor && -	-
TraesCS3A03G0245800	TraesCS3A02G112900	28.3464	32.1211	31.0183	68.2842	112.006	54.6325	30.4952	78.3077	-1.35762	0.000402852	0.00802654	Chr3A	P24631.1 RecName: Full=17.5 kDa class II heat shock protein && PF00011:Hsp20/alpha crystallin family	-
TraesCS3A03G0247900	TraesCS3A02G113900	52.4933	48.7354	72.376	142.031	159.433	133.938	57.8682	145.134	-1.32392	1.43e-06	9.15e-05	Chr3A	Q94A08.2 RecName: Full=Probable galactinol--sucrose galactosyltransferase 2; AltName: Full=Protein SEED IMBIBITION 2; AltName: Full=Raffinose synthase 2 && PF05691:Raffinose synthase or seed imbibition protein Sip1	-
TraesCS3A03G0269000	TraesCS3A02G122800	56.6928	68.6726	43.4256	15.4777	24.2176	28.1974	56.2637	22.6309	1.31261	0.00178404	0.0243713	Chr3A	-	-
TraesCS3A03G0272000	TraesCS3A02G123900	0	2.21524	8.27154	15.4777	25.2267	35.2468	3.4956	25.3171	-2.84791	0.000668502	0.0117961	Chr3A	Q5KS50.1 RecName: Full=Coleoptile phototropism protein 1; AltName: Full=BTB/POZ domain-containing protein CPT1; AltName: Full=Non-phototropic hypocotyl 3-like protein; Short=NPH3-like protein && PF03000:NPH3 family	-
TraesCS3A03G0286900	TraesCS3A02G128900	153.28	81.9641	172.668	254.017	220.986	347.181	135.971	274.061	-1.0104	0.000215925	0.00503276	Chr3A	Q9SM50.1 RecName: Full=Transcription factor HY5; AltName: Full=LeHY5; AltName: Full=tHY5 && PF00170:bZIP transcription factor	bZIP_1
TraesCS3A03G0297100	TraesCS3A02G310300	27.2965	17.722	19.6449	1.82091	4.03627	3.52468	21.5545	3.12729	2.79226	0.000318126	0.00672869	Chr3A	Q6VMN7.1 RecName: Full=Aminotransferase ALD1 homolog && -	-
TraesCS3A03G0312300	TraesCS3A02G136900	15.748	15.5067	15.5091	70.1051	77.6982	32.6033	15.588	60.1355	-1.94518	3.26e-05	0.00115066	Chr3A	PF07498:Rho termination factor, N-terminal domain	-
TraesCS3A03G0319000	TraesCS3A02G132700	107.086	117.408	108.564	291.346	201.813	245.846	111.019	246.335	-1.15125	2.7e-07	2.29e-05	Chr3A	PF04832:SOUL heme-binding protein	-
TraesCS3A03G0323300	TraesCS3A02G140100	284.514	282.444	204.721	528.975	527.742	693.481	257.226	583.399	-1.18254	6.67e-10	1.29e-07	Chr3A	A2WM14.1 RecName: Full=Transcription factor PCF5 && PF03634:TCP family transcription factor	TCP
TraesCS3A03G0327700	TraesCS3A02G141900	0	1.10762	0	10.9255	8.07254	14.0987	0.369207	11.0322	-4.85815	0.00125057	0.0188315	Chr3A	Q9FNI6.1 RecName: Full=Putative SWI/SNF-related matrix-associated actin-dependent regulator of chromatin subfamily A member 3-like 2; Short=SMARCA3-like protein 2 && PF08797:HIRAN domain	-
TraesCS3A03G0338800	TraesCS3A02G146600	181.627	242.569	257.452	89.2247	65.5894	54.6325	227.216	69.8155	1.70244	6.13e-11	1.57e-08	Chr3A	Q9SWE7.1 RecName: Full=V-type proton ATPase subunit E; Short=V-ATPase subunit E; AltName: Full=ClVE-1; AltName: Full=Vacuolar proton pump subunit E && PF01991:ATP synthase (E/31 kDa) subunit	-
TraesCS3A03G0340900	TraesCS3A02G147700	50.3936	48.7354	32.0522	92.8665	125.124	71.3748	43.7271	96.4552	-1.14025	0.000859902	0.0142469	Chr3A	Q5NAY7.2 RecName: Full=GDT1-like protein 1, chloroplastic; Flags: Precursor && PF01169:Uncharacterized protein family UPF0016	-
TraesCS3A03G0355300	TraesCS3A02G153300	73.4906	74.2107	50.6632	138.389	204.841	185.927	66.1215	176.386	-1.41607	2.04e-07	1.79e-05	Chr3A	Q8GZ63.2 RecName: Full=Pentatricopeptide repeat-containing protein At5g25630 && PF12854:PPR repeat|PF13041:PPR repeat family	-
TraesCS3A03G0368600	TraesCS3A02G158100	15.748	15.5067	12.4073	61.0005	86.7798	59.0384	14.554	68.9396	-2.24312	1.25e-07	1.2e-05	Chr3A	-	-
TraesCS3A03G0369800	TraesCS3A02G158800	0	1.10762	0	18.2091	11.0997	5.28702	0.369207	11.532	-4.91911	0.00121319	0.0184117	Chr3A	Q9FLE8.1 RecName: Full=Uncharacterized protein At5g39865 && -	-
TraesCS3A03G0388700	TraesCS3A02G165500	52.4933	57.5964	25.8486	127.464	98.8886	69.6124	45.3128	98.6549	-1.12429	0.00216624	0.0277843	Chr3A	Q6I544.1 RecName: Full=Germin-like protein 5-1; Flags: Precursor && PF00190:Cupin	-
TraesCS3A03G0430500	TraesCS3A02G180700	0	6.64573	6.20366	36.4182	21.1904	14.9799	4.28313	24.1962	-2.50286	0.00189117	0.0253033	Chr3A	-	-
TraesCS3A03G0460600	TraesCS3A02G191700	376.902	363.3	369.118	894.978	1100.89	780.717	369.773	925.529	-1.32292	8.53e-16	6.61e-13	Chr3A	Q5EFU4.1 RecName: Full=Magnesium-protoporphyrin IX monomethyl ester [oxidative] cyclase, chloroplastic; Short=Mg-protoporphyrin IX monomethyl ester oxidative cyclase; AltName: Full=Protein Xantha-l; Flags: Precursor	-
TraesCS3A03G0461600	TraesCS3A02G191400	319.159	290.197	276.063	576.318	670.021	552.494	295.14	599.611	-1.02202	3.44e-10	7.28e-08	Chr3A	-	-
TraesCS3A03G0516300	TraesCS3A02G201700	62.992	54.2735	72.376	142.031	143.288	106.622	63.2138	130.647	-1.04496	0.000167884	0.00416156	Chr3A	-	-
TraesCS3A03G0531600	TraesCS3A02G204800	8.39893	0	1.03394	13.6568	18.1632	41.415	3.14429	24.4117	-2.94937	0.00115775	0.0177832	Chr3A	Q9LTS4.1 RecName: Full=Putative transcription factor bHLH041; AltName: Full=Basic helix-loop-helix protein 41; Short=AtbHLH41; Short=bHLH 41; AltName: Full=Transcription factor EN 51; AltName: Full=bHLH transcriptio	HLH
TraesCS3A03G0535400	TraesCS3A02G206400	4.19947	0	1.03394	4.55228	17.1541	28.1974	1.74447	16.6346	-3.24207	0.00290112	0.0343211	Chr3A	O82645.1 RecName: Full=IQ domain-containing protein IQM1; AltName: Full=IQ motif-containing protein 1 && -	-
TraesCS3A03G0541400	TraesCS3A02G208800	9.4488	15.5067	15.5091	42.7914	41.3718	52.8702	13.4882	45.6778	-1.76203	0.00020801	0.00488898	Chr3A	Q38932.2 RecName: Full=Lycopene epsilon cyclase, chloroplastic; AltName: Full=Protein LUTEIN DEFICIENT 2; Flags: Precursor && PF05834:Lycopene cyclase protein	-
TraesCS3A03G0543900	TraesCS3A02G210000	3.1496	3.32287	6.20366	22.7614	22.1995	12.3364	4.22537	19.0991	-2.17012	0.00498886	0.0499639	Chr3A	PF06549:Protein of unknown function (DUF1118)	-
TraesCS3A03G0560900	TraesCS3A02G216200	108.136	83.0717	82.7154	206.673	197.777	215.006	91.3078	206.485	-1.17713	2.77e-07	2.34e-05	Chr3A	Q2V9B0.1 RecName: Full=Transcription factor MYB1R1; AltName: Full=Myb-related protein R1; Short=StMYB1R-1 && PF00249:Myb-like DNA-binding domain	Myb_DNA-binding
TraesCS3A03G0579900	TraesCS3A02G222700	120.735	84.1793	144.752	260.39	408.672	389.477	116.555	352.847	-1.59587	9.78e-11	2.37e-08	Chr3A	Q5ZBH5.1 RecName: Full=DEAD-box ATP-dependent RNA helicase 25 && PF00271:Helicase conserved C-terminal domain|PF00270:DEAD/DEAH box helicase	DEAD
TraesCS3A03G0589400	TraesCS3A02G227500	0	0	0	8.1941	12.1088	12.3364	0	10.8798	-5.79722	0.000156162	0.00394705	Chr3A	Q9SHJ5.1 RecName: Full=Glycerol-3-phosphate acyltransferase 1; Short=AtGPAT1 && PF12710:haloacid dehalogenase-like hydrolase	-
TraesCS3A03G0590600	TraesCS3A02G226800	808.397	467.417	481.817	1211.82	1500.48	1083.84	585.877	1265.38	-1.11038	7.24e-08	7.6e-06	Chr3A	Q9FWS4.1 RecName: Full=50S ribosomal protein L31, chloroplastic; AltName: Full=CL31; AltName: Full=Protein EMBRYO DEFECTIVE 2184; Flags: Precursor && PF01197:Ribosomal protein L31	-
TraesCS3A03G0635100	TraesCS3A02G246600	489.238	393.206	1012.23	287.704	334.001	239.678	631.558	287.128	1.1383	3.51e-05	0.00122301	Chr3A	Q8LEJ6.2 RecName: Full=Fasciclin-like arabinogalactan protein 11; Flags: Precursor && PF02469:Fasciclin domain	-
TraesCS3A03G0640500	TraesCS3A02G249500	73.4906	69.7802	58.9347	127.464	97.8795	266.995	67.4019	164.113	-1.28623	0.000200978	0.00475898	Chr3A	Q9ZQG9.2 RecName: Full=Glucan endo-1,3-beta-glucosidase 14; AltName: Full=(1->3)-beta-glucan endohydrolase 14; Short=(1->3)-beta-glucanase 14; AltName: Full=Beta-1,3-endoglucanase 14; Short=Beta-1,3-glucanase 14; Fl	Glyco_hydro_17
TraesCS3A03G0648800	TraesCS3A02G252400	490.288	324.533	424.95	203.942	208.877	122.483	413.257	178.434	1.21377	2.05e-07	1.79e-05	Chr3A	-	-
TraesCS3A03G0656700	TraesCS3A02G256400	38.8451	44.3049	47.5614	157.509	223.004	51.989	43.5704	144.167	-1.72415	2.95e-05	0.00106629	Chr3A	Q9STF2.1 RecName: Full=Protein plastid transcriptionally active 16, chloroplastic; Short=pTAC16; Flags: Precursor && PF13460:NAD(P)H-binding	-
TraesCS3A03G0664600	TraesCS3A02G260700	1.04987	0	0	20.03	15.136	7.93053	0.349955	14.3655	-5.2357	0.000319822	0.00674616	Chr3A	Q9C9N6.1 RecName: Full=Protein PLASTID MOVEMENT IMPAIRED 2; AltName: Full=Protein WEAK CHLOROPLAST MOVEMENT UNDER BLUE LIGHT 2; Short=Protein WEB2 && PF05701:Weak chloroplast movement under blue light	-
TraesCS3A03G0681600	TraesCS3A02G268600	539.631	332.287	387.729	777.529	1161.44	808.033	419.882	915.666	-1.12392	5.19e-08	5.79e-06	Chr3A	Q9ASV6.1 RecName: Full=30S ribosomal protein S20, chloroplastic; Flags: Precursor && PF01649:Ribosomal protein S20	-
TraesCS3A03G0695200	TraesCS3A02G274900	30.4461	32.1211	23.7807	43.7019	84.7617	111.909	28.7826	80.124	-1.47856	0.000298195	0.006432	Chr3A	P69781.1 RecName: Full=GATA transcription factor 12 && PF00320:GATA zinc finger	GATA
TraesCS3A03G0701500	TraesCS3A02G278000	6.2992	3.32287	13.4413	30.045	81.7344	7.93053	7.68777	39.9033	-2.36558	0.001696	0.0235054	Chr3A	Q8GW43.2 RecName: Full=8-amino-7-oxononanoate synthase; Short=AONS; AltName: Full=7-keto-8-amino-pelargonic acid synthase; Short=7-KAP synthase; Short=KAPA synthase; AltName: Full=8-amino-7-ketopelargonate synthase;	Aminotran_1_2
TraesCS3A03G0704100	TraesCS3A02G279700	111.286	57.5964	73.4099	305.913	137.233	163.016	80.764	202.054	-1.3227	5.53e-05	0.00173856	Chr3A	Q4R1I9.1 RecName: Full=Anthocyanidin 5,3-O-glucosyltransferase; AltName: Full=UDP-glucose: anthocyanidin 5,3-O-glucosyltransferase && PF00201:UDP-glucoronosyl and UDP-glucosyl transferase	UDPGT
TraesCS3A03G0737200	TraesCS3A02G305500	8.39893	12.1838	7.2376	29.1346	42.3808	29.0786	9.27346	33.5313	-1.85613	0.000916983	0.0149467	Chr3A	Q9M811.2 RecName: Full=Rop guanine nucleotide exchange factor 11; Short=AtRopGEF11; AltName: Full=Phytochrome interacting RopGEF 1; AltName: Full=Rho of plants guanine nucleotide exchange factor 11 && PF03759:PRONE	DUF315
TraesCS3A03G0743200	TraesCS3A02G302900	16.7979	26.5829	15.5091	60.0901	93.8433	96.9287	19.63	83.6207	-2.09461	1.58e-07	1.46e-05	Chr3A	Q9FME3.1 RecName: Full=Transcription factor TCP5 && PF03634:TCP family transcription factor	TCP
TraesCS3A03G0755200	TraesCS3A02G297200	7.34906	21.0448	7.2376	102.881	18.1632	102.216	11.8772	74.4201	-2.65683	1.03e-05	0.000455164	Chr3A	Q9FEQ8.1 RecName: Full=Peroxidase 2; AltName: Full=Plasma membrane-bound peroxidase 2; Short=pmPOX2; Flags: Precursor && PF00141:Peroxidase	-
TraesCS3A03G0755300	TraesCS3A02G297100	11.5485	12.1838	7.2376	42.7914	22.1995	59.0384	10.3233	41.3431	-2.00806	0.000319814	0.00674616	Chr3A	Q9FEQ8.1 RecName: Full=Peroxidase 2; AltName: Full=Plasma membrane-bound peroxidase 2; Short=pmPOX2; Flags: Precursor && PF00141:Peroxidase	-
TraesCS3A03G0762900	TraesCS3A02G321700	7.34906	11.0762	8.27154	111.986	68.6166	81.9488	8.89894	87.5172	-3.303	3.55e-13	1.62e-10	Chr3A	PF03126:Plus-3 domain	-
TraesCS3A03G0763900	TraesCS3A02G321100	26.2467	34.3363	35.1541	89.2247	62.5622	67.8501	31.9123	73.2123	-1.19933	0.000829318	0.013872	Chr3A	Q5ZAY9.1 RecName: Full=Cytokinin dehydrogenase 5; AltName: Full=Cytokinin oxidase 5; Short=OsCKX5; Flags: Precursor && PF09265:Cytokinin dehydrogenase 1, FAD and cytokinin binding|PF01565:FAD binding domain	FAD_binding_4
TraesCS3A03G0782300	TraesCS3A02G325700	37.7952	22.1524	22.7467	74.6574	68.6166	51.1079	27.5648	64.7939	-1.23095	0.00177842	0.0243172	Chr3A	Q9T076.1 RecName: Full=Early nodulin-like protein 2; AltName: Full=Phytocyanin-like protein; Flags: Precursor && PF02298:Plastocyanin-like domain	Cu_bind_like
TraesCS3A03G0795400	TraesCS3A02G332400	31.496	14.3991	36.188	74.6574	88.7979	59.9196	27.361	74.4583	-1.43838	0.000337914	0.00701741	Chr3A	PF11460:Protein of unknown function (DUF3007)	-
TraesCS3A03G0795500	TraesCS3A02G332500	17.8477	8.86098	8.27154	34.5973	51.4624	28.1974	11.6601	38.0857	-1.7032	0.00173951	0.0239449	Chr3A	Q9LXX5.1 RecName: Full=PsbP domain-containing protein 6, chloroplastic; AltName: Full=OEC23-like protein 1; Flags: Precursor && PF01789:PsbP	-
TraesCS3A03G0833200	TraesCS3A02G349000	78.74	55.3811	47.5614	108.344	173.56	151.561	60.5608	144.488	-1.2533	2.83e-05	0.00103318	Chr3A	-	-
TraesCS3A03G0866100	TraesCS3A02G364400	20.9973	23.2601	13.4413	57.3587	64.5803	44.9397	19.2329	55.6262	-1.53333	0.000344013	0.0071202	Chr3A	Q9LZN0.1 RecName: Full=Rop guanine nucleotide exchange factor 7; Short=AtRopGEF7; AltName: Full=Rho of plants guanine nucleotide exchange factor 7 && PF03759:PRONE (Plant-specific Rop nucleotide exchanger)	DUF315
TraesCS3A03G0869500	TraesCS3A02G365600	2.09973	3.32287	2.06789	121.091	71.6438	126.888	2.49683	106.541	-5.4251	6.47e-17	5.94e-14	Chr3A	Q9SR77.1 RecName: Full=Heme-binding-like protein At3g10130, chloroplastic; Flags: Precursor && PF04832:SOUL heme-binding protein	-
TraesCS3A03G0869600	TraesCS3A02G365700	124.934	84.1793	135.447	209.405	351.155	319.865	114.853	293.475	-1.35129	1.12e-07	1.09e-05	Chr3A	Q9M394.1 RecName: Full=Fructokinase-like 1, chloroplastic; AltName: Full=PEP-associated protein 6; AltName: Full=pfkB-type carbohydrate kinase family protein 2; Flags: Precursor && PF00294:pfkB family carbohydrate k	PfkB
TraesCS3A03G0871600	TraesCS3A02G367000	0	5.53811	1.03394	60.0901	89.807	19.3857	2.19069	56.4276	-4.71376	1.19e-08	1.6e-06	Chr3A	P46285.1 RecName: Full=Sedoheptulose-1,7-bisphosphatase, chloroplastic; AltName: Full=SED(1,7)P2ase; AltName: Full=Sedoheptulose bisphosphatase; Short=SBPase; Flags: Precursor && PF18913:Fructose-1-6-bisphosphatase,	-
TraesCS3A03G0872800	TraesCS3A02G367900	50.3936	48.7354	81.6815	71.926	132.188	177.115	60.2702	127.076	-1.07513	0.00240586	0.0299273	Chr3A	Q9SND9.1 RecName: Full=Uncharacterized acetyltransferase At3g50280 && PF02458:Transferase family	-
TraesCS3A03G0877700	TraesCS3A02G370100	16.7979	22.1524	18.611	53.7169	51.4624	35.2468	19.1871	46.8087	-1.28669	0.00360913	0.0401728	Chr3A	Q56Y11.2 RecName: Full=Dehydrodolichyl diphosphate synthase 2; Short=Dedol-PP synthase 2 && PF01255:Putative undecaprenyl diphosphate synthase	Prenyltransf
TraesCS3A03G0900500	TraesCS3A02G381000	74.5405	78.6412	84.7833	202.121	216.949	94.2852	79.3217	171.119	-1.10737	0.000353831	0.00726836	Chr3A	P54773.1 RecName: Full=Photosystem II 22 kDa protein, chloroplastic; AltName: Full=CP22; Flags: Precursor && PF00504:Chlorophyll A-B binding protein	-
TraesCS3A03G0925200	TraesCS3A02G393900	259.317	206.018	253.316	624.573	844.589	787.766	239.55	752.309	-1.64994	1.51e-20	2.2e-17	Chr3A	F4JF21.1 RecName: Full=Protein PLASTID TRANSCRIPTIONALLY ACTIVE 10; Short=pTAC10; AltName: Full=Plastid-encoded RNA polymerase-associated protein 3; Short=PEP-associated protein 3; AltName: Full=Protein PIGMENT DEFE	-
TraesCS3A03G0937600	TraesCS3A02G399600	28.3464	45.4125	31.0183	108.344	200.804	88.117	34.9257	132.422	-1.92261	1.74e-07	1.58e-05	Chr3A	PF05697:Bacterial trigger factor protein (TF)	-
TraesCS3A03G0942500	TraesCS3A02G402200	79.7898	57.5964	61.0026	129.285	156.405	117.196	66.1296	134.295	-1.01986	0.000210275	0.00493222	Chr3A	Q56XR7.1 RecName: Full=Rhodanese-like domain-containing protein 4A, chloroplastic; AltName: Full=Sulfurtransferase 4A; Short=AtStr4a; Flags: Precursor && -	-
TraesCS3A03G0954900	TraesCS3A02G408700	24.1469	16.6143	11.3734	42.7914	61.5531	44.0585	17.3782	49.4677	-1.50769	0.00105672	0.0166456	Chr3A	Q8LJJ9.1 RecName: Full=Stearoyl-[acyl-carrier-protein] 9-desaturase 1, chloroplastic; Short=Stearoyl-ACP desaturase 1; AltName: Full=Acyl-[acyl-carrier-protein] desaturase 1; Flags: Precursor >B8A7A3.1 RecName: Full	-
TraesCS3A03G1006600	TraesCS3A02G433000	216.272	161.713	148.888	451.586	504.534	356.874	175.624	437.665	-1.3164	3.1e-10	6.71e-08	Chr3A	Q9M158.2 RecName: Full=Rhodanese-like domain-containing protein 4, chloroplastic; AltName: Full=Protein THYLAKOID RHODANESE-LIKE; AltName: Full=Sulfurtransferase 4; Short=AtStr4; Flags: Precursor && -	-
TraesCS3A03G1012500	TraesCS3A02G435700	533.332	336.717	354.642	883.142	967.696	726.965	408.231	859.268	-1.07303	3.32e-08	3.92e-06	Chr3A	O65037.1 RecName: Full=50S ribosomal protein L27, chloroplastic; AltName: Full=CL27; Flags: Precursor && PF01016:Ribosomal L27 protein	-
TraesCS3A03G1030000	TraesCS3A02G443700	23.0971	4.43049	22.7467	63.7319	74.671	26.4351	16.7581	54.946	-1.70541	0.00221609	0.0282366	Chr3A	Q9FG89.1 RecName: Full=Photosynthetic NDH subunit of subcomplex B 5, chloroplastic; Short=Protein PnsB5; AltName: Full=NAD(P)H dehydrogenase 18; Flags: Precursor && -	-
TraesCS3A03G1038400	TraesCS3A02G447800	0	0	0	4.55228	10.0907	5.28702	0	6.64332	-5.08262	0.00333887	0.0380337	Chr3A	Q5JK35.1 RecName: Full=Beta-glucosidase 5; Short=Os1bglu5; Flags: Precursor && PF00232:Glycosyl hydrolase family 1	Glyco_hydro_1
TraesCS3A03G1041800	TraesCS3A02G448900	9.4488	7.75336	8.27154	40.0601	35.3174	32.6033	8.49123	35.9936	-2.08264	0.000133774	0.00350833	Chr3A	Q68CP4.2 RecName: Full=Heparan-alpha-glucosaminide N-acetyltransferase; AltName: Full=Transmembrane protein 76 && PF07786:Protein of unknown function (DUF1624)	-
TraesCS3A03G1042100	TraesCS3A02G449200	14.6981	4.43049	10.3394	27.3137	32.2902	39.6527	9.82268	33.0855	-1.747	0.00246011	0.0304685	Chr3A	Q5JK24.1 RecName: Full=Thiamine pyrophosphokinase 1; Short=OsTPK1; AltName: Full=Thiamine kinase 1 && PF04265:Thiamin pyrophosphokinase, vitamin B1 binding domain|PF04263:Thiamin pyrophosphokinase, catalytic domain	-
TraesCS3A03G1085200	TraesCS3A02G466200	19.9475	16.6143	10.3394	100.15	135.215	98.6911	15.6337	111.352	-2.83306	9.91e-14	5.2e-11	Chr3A	B4G072.1 RecName: Full=DIMBOA UDP-glucosyltransferase BX9; AltName: Full=2,4-dihydroxy-7-methoxy-2H-1,4-benzoxazin-3(4H)-one 2-D-glucosyltransferase BX9; AltName: Full=Protein BENZOXAZINLESS 9 && PF00201:UDP-glucoro	UDPGT
TraesCS3A03G1127700	TraesCS3A02G480700	13.6483	19.9372	26.8825	33.6869	53.4806	60.8007	20.156	49.3227	-1.29009	0.00480905	0.0488648	Chr3A	-	-
TraesCS3A03G1143800	TraesCS3A02G487500	119.685	67.565	57.9008	207.584	153.378	172.709	81.7168	177.89	-1.1224	0.000120805	0.00324295	Chr3A	Q9LPR8.1 RecName: Full=Scarecrow-like protein 3; Short=AtSCL3; AltName: Full=GRAS family protein 5; Short=AtGRAS-5 && PF03514:GRAS domain family	GRAS
TraesCS3A03G1172200	TraesCS3A02G498900	1.04987	6.64573	5.16971	26.4032	18.1632	37.8903	4.28844	27.4856	-2.68929	0.00024546	0.00556011	Chr3A	O65238.2 RecName: Full=G-type lectin S-receptor-like serine/threonine-protein kinase At5g35370; Flags: Precursor && PF01453:D-mannose binding lectin	B_lectin
TraesCS3A03G1216700	TraesCS3A02G516500	20.9973	19.9372	5.16971	66.4633	55.4987	52.8702	15.3681	58.2774	-1.92758	6.64e-05	0.00200352	Chr3A	Q8RWM7.1 RecName: Full=Protein COFACTOR ASSEMBLY OF COMPLEX C SUBUNIT B CCB3, chloroplastic; AltName: Full=YGGT family protein YLMG3; AltName: Full=YlmG homolog protein 3; Short=AtYLMG3; Flags: Precursor && PF02325:	-
TraesCS3A03G1228500	TraesCS3A02G520500	156.43	127.377	159.227	310.465	287.584	306.647	147.678	301.566	-1.02932	1.29e-07	1.22e-05	Chr3A	-	-
TraesCS3A03G1235500	TraesCS3A02G523300	125.984	81.9641	218.162	58.2692	58.5259	44.9397	142.037	53.9116	1.40024	5.71e-05	0.00177957	Chr3A	PF13968:Domain of unknown function (DUF4220)|PF04578:Protein of unknown function, DUF594	-
TraesCS3A03G1277500	TraesCS3A02G537900	0	0	0	3.64182	18.1632	4.40585	0	8.73696	-5.47504	0.00110604	0.0171929	Chr3A	Q9SFT7.1 RecName: Full=Serine/threonine-protein kinase At3g07070 && PF07714:Protein tyrosine and serine/threonine kinase	Pkinase_Tyr
TraesCS3B03G0005300	TraesCS3B02G002300	0	0	0	3.64182	5.04534	37.8903	0	15.5258	-6.31473	6.29e-05	0.00191858	Chr3B	-	-
TraesCS3B03G0056000	TraesCS3B02G024600	170.078	252.538	339.133	71.0155	120.079	126.888	253.916	105.994	1.26108	1.11e-05	0.000483544	Chr3B	Q0JR55.2 RecName: Full=CDP-diacylglycerol--serine O-phosphatidyltransferase 1; AltName: Full=Phosphatidylserine synthase 1 && PF03034:Phosphatidyl serine synthase	PSS
TraesCS3B03G0091200	TraesCS3B02G040300	30.4461	35.4439	22.7467	91.0456	80.7254	53.7514	29.5456	75.1741	-1.34834	0.000359009	0.0073461	Chr3B	PF07891:Protein of unknown function (DUF1666)	-
TraesCS3B03G0108500	TraesCS3B02G048800	3.1496	9.9686	9.30548	37.3287	33.2992	44.0585	7.47456	38.2288	-2.35902	4.47e-05	0.00147513	Chr3B	Q943E9.1 RecName: Full=17.9 kDa heat shock protein 2; Short=OsHsp17.9B && PF00011:Hsp20/alpha crystallin family	-
TraesCS3B03G0138600	TraesCS3B02G061700	6.2992	12.1838	11.3734	96.5083	145.306	31.7221	9.95214	91.1787	-3.19506	3.55e-09	5.57e-07	Chr3B	P23993.1 RecName: Full=Photosystem I reaction center subunit XI, chloroplastic; Short=PSI-L; AltName: Full=PSI subunit V; Flags: Precursor && PF02605:Photosystem I reaction centre subunit XI	-
TraesCS3B03G0152000	TraesCS3B02G067300	162.729	170.574	167.499	333.227	478.298	296.954	166.934	369.493	-1.14493	1.08e-07	1.06e-05	Chr3B	B8AD72.1 RecName: Full=Probable zinc metalloprotease EGY2, chloroplastic; AltName: Full=Protein ETHYLENE-DEPENDENT GRAVITROPISM-DEFICIENT AND YELLOW-GREEN 2; Flags: Precursor && -	-
TraesCS3B03G0157700	TraesCS3B02G070200	6.2992	3.32287	3.10183	20.9405	22.1995	16.7422	4.2413	19.9607	-2.23156	0.00295222	0.0347745	Chr3B	Q9M390.1 RecName: Full=Protein NRT1/ PTR FAMILY 8.1; Short=AtNPF8.1; AltName: Full=Peptide transporter PTR1 && PF00854:POT family	-
TraesCS3B03G0165900	TraesCS3B02G072200	637.269	438.618	351.541	1093.46	1620.56	1386.08	475.809	1366.7	-1.52202	2.34e-13	1.12e-10	Chr3B	Q8W487.1 RecName: Full=Uncharacterized protein At2g39795, mitochondrial; Flags: Precursor && PF02330:Mitochondrial glycoprotein	-
TraesCS3B03G0202200	TraesCS3B02G087300	27.2965	25.4753	29.9843	110.165	131.179	68.7313	27.5854	103.358	-1.90261	1.3e-07	1.23e-05	Chr3B	PF14389:Leucine-zipper of ternary complex factor MIP1|PF04784:Protein of unknown function, DUF547	-
TraesCS3B03G0227900	TraesCS3B02G099800	0	0	0	5.46273	7.06347	6.16819	0	6.23147	-4.99282	0.00422822	0.0447972	Chr3B	Q67YC9.1 RecName: Full=Uncharacterized protein At4g14100; Flags: Precursor && -	-
TraesCS3B03G0228900	TraesCS3B02G100200	3.1496	5.53811	4.13577	25.4928	14.1269	18.5046	4.27449	19.3748	-2.18612	0.00403366	0.0434823	Chr3B	Q9S7F4.1 RecName: Full=Putative pentatricopeptide repeat-containing protein At2g01510 && PF13041:PPR repeat family|PF01535:PPR repeat|PF14432:DYW family of nucleic acid deaminases	PPR
TraesCS3B03G0236400	TraesCS3B02G103100	71.3909	57.5964	62.0366	193.017	124.115	79.3053	63.6746	132.146	-1.0526	0.00155806	0.0220791	Chr3B	Q8L5Z1.1 RecName: Full=GDSL esterase/lipase At1g33811; AltName: Full=Extracellular lipase At1g33811; Flags: Precursor && PF00657:GDSL-like Lipase/Acylhydrolase	Lipase_GDSL
TraesCS3B03G0285900	TraesCS3B02G123200	12.5984	11.0762	13.4413	30.045	58.5259	29.9598	12.372	39.5102	-1.66995	0.00147099	0.0211941	Chr3B	-	-
TraesCS3B03G0288800	TraesCS3B02G124200	104.987	104.117	110.632	113.807	204.841	334.845	106.578	217.831	-1.03186	0.00115954	0.0178029	Chr3B	-	-
TraesCS3B03G0310600	TraesCS3B02G130300	9.4488	9.9686	1.03394	51.896	40.3627	14.0987	6.81711	35.4525	-2.38391	0.000743051	0.012769	Chr3B	P24631.1 RecName: Full=17.5 kDa class II heat shock protein && PF00011:Hsp20/alpha crystallin family	-
TraesCS3B03G0354900	TraesCS3B02G148900	6.2992	7.75336	11.3734	42.7914	30.272	41.415	8.47531	38.1595	-2.17022	8.02e-05	0.00232639	Chr3B	Q06398.2 RecName: Full=Probable glutathione S-transferase GSTU6; AltName: Full=28 kDa cold-induced protein && PF13410:Glutathione S-transferase, C-terminal domain	-
TraesCS3B03G0362500	TraesCS3B02G152300	82.9394	44.3049	74.4439	69.1946	151.36	275.806	67.2294	165.454	-1.29873	0.00113368	0.0174905	Chr3B	P30110.1 RecName: Full=Glutathione S-transferase 1; AltName: Full=GST class-phi && PF02798:Glutathione S-transferase, N-terminal domain|PF00043:Glutathione S-transferase, C-terminal domain	GST_N
TraesCS3B03G0370000	TraesCS3B02G154800	20.9973	15.5067	26.8825	77.3887	87.7889	68.7313	21.1289	77.9696	-1.87899	8.8e-07	6.07e-05	Chr3B	PF07498:Rho termination factor, N-terminal domain	-
TraesCS3B03G0416500	TraesCS3B02G174400	19.9475	50.9506	15.5091	50.9855	96.8705	71.3748	28.8024	73.0769	-1.34702	0.00305813	0.0356322	Chr3B	Q5NAY7.2 RecName: Full=GDT1-like protein 1, chloroplastic; Flags: Precursor && PF01169:Uncharacterized protein family UPF0016	-
TraesCS3B03G0420400	TraesCS3B02G175900	33.5957	15.5067	18.611	100.15	92.8342	74.0183	22.5711	89.0009	-1.97623	2.93e-07	2.46e-05	Chr3B	Q9ZQ80.1 RecName: Full=Nodulin-related protein 1; Short=AtNRP1; AltName: Full=RPS2-interacting protein 11 && -	-
TraesCS3B03G0431100	TraesCS3B02G179900	17.8477	25.4753	8.27154	63.7319	113.016	81.9488	17.1982	86.2321	-2.33061	7.84e-08	8.08e-06	Chr3B	Q8GZ63.2 RecName: Full=Pentatricopeptide repeat-containing protein At5g25630 && PF13041:PPR repeat family|PF13812:Pentatricopeptide repeat domain|PF17177:Pentacotripeptide-repeat region of PRORP|PF12854:PPR repeat	-
TraesCS3B03G0444200	TraesCS3B02G185100	31.496	13.2915	25.8486	105.613	121.088	101.335	23.5453	109.345	-2.20979	7.56e-10	1.44e-07	Chr3B	-	-
TraesCS3B03G0513100	TraesCS3B02G211100	7.34906	29.9058	51.6971	117.449	116.043	117.196	29.6507	116.896	-1.97789	6.22e-06	0.000306307	Chr3B	-	-
TraesCS3B03G0573400	TraesCS3B02G228700	36.7453	34.3363	47.5614	96.5083	85.7707	56.3949	39.5477	79.558	-1.00587	0.00439134	0.0459391	Chr3B	-	-
TraesCS3B03G0604000	TraesCS3B02G234300	132.283	87.5022	97.1906	224.883	338.038	176.234	105.659	246.385	-1.21909	8.32e-06	0.00038745	Chr3B	B6RGY0.1 RecName: Full=Peptide deformylase 1A, chloroplastic; Short=OsPDF1A; Short=PDF 1A; Flags: Precursor && PF01327:Polypeptide deformylase	Pep_deformylase
TraesCS3B03G0619100	TraesCS3B02G236600	12.5984	6.64573	31.0183	51.896	62.5622	53.7514	16.7541	56.0698	-1.7353	0.000539294	0.0100771	Chr3B	Q1XDL3.1 RecName: Full=Uncharacterized protein ycf36 && PF06799:Conserved in the green lineage and diatoms 27	-
TraesCS3B03G0627700	TraesCS3B02G240500	6.2992	2.21524	2.06789	33.6869	56.5078	16.7422	3.52744	35.6456	-3.32965	8.11e-06	0.000380018	Chr3B	PF06549:Protein of unknown function (DUF1118)	-
TraesCS3B03G0658900	TraesCS3B02G252600	65.0917	68.6726	114.768	152.046	289.602	228.223	82.844	223.29	-1.42802	1.35e-06	8.68e-05	Chr3B	Q5ZBH5.1 RecName: Full=DEAD-box ATP-dependent RNA helicase 25 && PF00270:DEAD/DEAH box helicase|PF00271:Helicase conserved C-terminal domain	DEAD
TraesCS3B03G0671300	TraesCS3B02G257700	581.626	268.045	332.93	1116.22	1500.48	1091.77	394.2	1236.16	-1.64813	1.69e-12	6.11e-10	Chr3B	Q9FWS4.1 RecName: Full=50S ribosomal protein L31, chloroplastic; AltName: Full=CL31; AltName: Full=Protein EMBRYO DEFECTIVE 2184; Flags: Precursor && PF01197:Ribosomal protein L31	-
TraesCS3B03G0731700	TraesCS3B02G284000	101.837	80.8564	157.159	34.5973	49.4443	48.4644	113.284	44.1687	1.36121	5.2e-05	0.00165727	Chr3B	-	-
TraesCS3B03G0744400	TraesCS3B02G289000	50.3936	44.3049	51.6971	19.1196	19.1723	19.3857	48.7985	19.2259	1.34424	0.00131422	0.0195158	Chr3B	PF03478:Protein of unknown function (DUF295)	DUF295
TraesCS3B03G0771100	TraesCS3B02G299300	13.6483	23.2601	22.7467	40.0601	79.7163	37.0091	19.885	52.2618	-1.39119	0.00319304	0.0367862	Chr3B	Q944I4.2 RecName: Full=D-glycerate 3-kinase, chloroplastic; Short=AtGLYK; Flags: Precursor && PF00485:Phosphoribulokinase / Uridine kinase family	-
TraesCS3B03G0781200	TraesCS3B02G303700	5.24933	8.86098	10.3394	38.2391	44.399	42.2962	8.14991	41.6448	-2.35296	1.2e-05	0.000517142	Chr3B	-	-
TraesCS3B03G0792400	TraesCS3B02G308500	27.2965	46.5201	33.0862	55.5378	65.5894	103.978	35.6343	75.0351	-1.07807	0.00489889	0.0493748	Chr3B	P69781.1 RecName: Full=GATA transcription factor 12 && PF00320:GATA zinc finger	GATA
TraesCS3B03G0796000	TraesCS3B02G310000	0	2.21524	8.27154	20.03	12.1088	71.3748	3.4956	34.5045	-3.29787	0.000167588	0.00415898	Chr3B	O49545.1 RecName: Full=Leucine-rich repeat receptor-like serine/threonine-protein kinase BAM1; AltName: Full=Protein BARELY ANY MERISTEM 1; Flags: Precursor && PF08263:Leucine rich repeat N-terminal domain|PF07714:P	Pkinase_Tyr
TraesCS3B03G0796600	TraesCS3B02G310400	50.3936	40.982	40.3238	73.7469	126.133	125.126	43.8998	108.335	-1.30216	7.04e-05	0.00209516	Chr3B	Q76NT0.1 RecName: Full=rRNA methyltransferase 1, mitochondrial; AltName: Full=rRNA (guanosine-2'-O)-methyltransferase; Flags: Precursor && PF08032:RNA 2'-O ribose methyltransferase substrate binding|PF00588:SpoU rRN	SpoU_methylase
TraesCS3B03G0806900	TraesCS3B02G314600	14.6981	6.64573	0	30.9555	19.1723	49.3455	7.11462	33.1578	-2.22467	0.00286173	0.0339855	Chr3B	Q942D6.1 RecName: Full=Heat stress transcription factor C-1b; AltName: Full=Heat stress transcription factor 11; Short=rHsf11; AltName: Full=Heat stress transcription factor 3; Short=OsHsf-03 && PF00447:HSF-type DNA	HSF_DNA-bind
TraesCS3B03G0814900	TraesCS3B02G318400	5.24933	0	0	20.9405	17.1541	33.4845	1.74978	23.8597	-3.75992	0.000108448	0.00298329	Chr3B	PF01190:Pollen protein Ole e 1 like	-
TraesCS3B03G0823600	TraesCS3B02G322000	2.09973	12.1838	10.3394	18.2091	25.2267	58.1572	8.20767	33.8643	-2.05068	0.00248886	0.0307568	Chr3B	Q9FZ62.1 RecName: Full=Inorganic pyrophosphatase 2; Short=AtPPsPase2; Short=PPi phosphatase 2; Short=Pyrophosphate-specific phosphatase 2 && PF06888:Putative Phosphatase	-
TraesCS3B03G0837600	TraesCS3B02G328200	9.4488	14.3991	16.5431	50.9855	30.272	29.9598	13.4637	37.0724	-1.46227	0.00493632	0.0496309	Chr3B	Q9LZJ6.1 RecName: Full=RING-H2 finger protein ATL5; AltName: Full=RING-type E3 ubiquitin transferase ATL5 && PF13639:Ring finger domain	-
TraesCS3B03G0840200	TraesCS3B02G329400	51.4435	112.977	95.1227	51.896	37.3355	22.0293	86.5146	37.0869	1.22257	0.00234056	0.0293983	Chr3B	Q84MD8.1 RecName: Full=Bifunctional riboflavin kinase/FMN phosphatase; Includes: RecName: Full=FMN phosphatase; AltName: Full=FMN phosphohydrolase; Includes: RecName: Full=Riboflavin kinase; AltName: Full=Flavokinas	-
TraesCS3B03G0845400	TraesCS3B02G331600	74.5405	43.1973	59.9687	146.583	156.405	127.77	59.2355	143.586	-1.2746	6.55e-06	0.000318913	Chr3B	PF14159:CAAD domains of cyanobacterial aminoacyl-tRNA synthetase	-
TraesCS3B03G0849100	TraesCS3B02G333400	41.9947	13.2915	34.1201	120.18	157.414	140.106	29.8021	139.234	-2.21827	4.36e-10	8.91e-08	Chr3B	Q9FME3.1 RecName: Full=Transcription factor TCP5 && PF03634:TCP family transcription factor	TCP
TraesCS3B03G0875100	TraesCS3B02G343800	8.39893	0	8.27154	167.524	135.215	180.64	5.55682	161.126	-4.83681	6.64e-25	1.25e-21	Chr3B	PF03126:Plus-3 domain	-
TraesCS3B03G0876000	TraesCS3B02G344200	34.6456	23.2601	18.611	86.4933	123.106	62.5631	25.5055	90.7209	-1.82807	3.32e-06	0.000183186	Chr3B	Q5ZBY9.1 RecName: Full=Photosystem II reaction center W protein, chloroplastic; AltName: Full=PSII 6.1 kDa protein; Flags: Precursor && PF07123:Photosystem II reaction centre W protein (PsbW)	-
TraesCS3B03G0914300	TraesCS3B02G361000	214.173	131.807	323.624	509.855	373.355	523.415	223.201	468.875	-1.07005	4.31e-05	0.00143619	Chr3B	O22197.1 RecName: Full=Probable E3 ubiquitin-protein ligase RHC1A; AltName: Full=RING-H2 finger C1a; AltName: Full=RING-H2 zinc finger protein RHC1a && PF13639:Ring finger domain|PF14369:zinc-ribbon	-
TraesCS3B03G0917200	TraesCS3B02G362500	26.2467	19.9372	21.7128	98.3292	113.016	75.7806	22.6322	95.7085	-2.0775	7.83e-09	1.11e-06	Chr3B	PF11460:Protein of unknown function (DUF3007)	-
TraesCS3B03G0917300	TraesCS3B02G362600	9.4488	19.9372	8.27154	38.2391	46.4171	32.6033	12.5525	39.0865	-1.64356	0.00176744	0.0242003	Chr3B	Q9LXX5.1 RecName: Full=PsbP domain-containing protein 6, chloroplastic; AltName: Full=OEC23-like protein 1; Flags: Precursor && PF01789:PsbP	-
TraesCS3B03G0917500	TraesCS3B02G362700	48.2939	77.5336	64.1045	404.242	428.854	367.448	63.3106	400.181	-2.66198	5.26e-33	1.75e-29	Chr3B	O23614.1 RecName: Full=Carboxyl-terminal-processing peptidase 2, chloroplastic; AltName: Full=D1 C-terminal processing protease 2; AltName: Full=Photosystem II D1 protein processing peptidase 2; Flags: Precursor &&	Peptidase_S41
TraesCS3B03G0918200	TraesCS3B02G363000	2.09973	4.43049	1.03394	16.3882	17.1541	23.7916	2.52139	19.1113	-2.93727	0.000719764	0.0124827	Chr3B	O64732.1 RecName: Full=UDP-glycosyltransferase 87A1 && PF00201:UDP-glucoronosyl and UDP-glucosyl transferase	UDPGT
TraesCS3B03G0945700	TraesCS3B02G376800	140.682	141.776	222.298	43.7019	64.5803	37.8903	168.252	48.7242	1.79375	4.1e-09	6.32e-07	Chr3B	Q40636.2 RecName: Full=Expansin-A2; AltName: Full=Alpha-expansin-2; AltName: Full=OsEXP2; AltName: Full=OsEXPA2; AltName: Full=OsaEXPa1.23; AltName: Full=RiExB; AltName: Full=RiExC; Flags: Precursor && PF01357:Expan	-
TraesCS3B03G0951200	TraesCS3B02G379200	11.5485	29.9058	18.611	22.7614	35.3174	132.176	20.0218	63.4181	-1.6684	0.00475739	0.0484882	Chr3B	Q6IEQ7.1 RecName: Full=WRKY transcription factor WRKY24; Short=OsWRKY24 && PF03106:WRKY DNA -binding domain	WRKY
TraesCS3B03G0954000	TraesCS3B02G380600	39.8949	11.0762	21.7128	81.0306	68.6166	52.8702	24.228	67.5058	-1.47424	0.000981462	0.0157411	Chr3B	Q6K9A2.1 RecName: Full=Cinnamoyl-CoA reductase 1; Short=OsCCR1 && PF01370:NAD dependent epimerase/dehydratase family	Epimerase
TraesCS3B03G0955000	TraesCS3B02G381100	47.244	54.2735	70.3081	118.359	165.487	222.936	57.2752	168.927	-1.5602	2.4e-07	2.06e-05	Chr3B	-	-
TraesCS3B03G0957300	TraesCS3B02G381800	47.244	83.0717	65.1384	19.1196	37.3355	26.4351	65.1514	27.6301	1.24137	0.00216963	0.0278123	Chr3B	-	-
TraesCS3B03G0973100	TraesCS3B02G389500	0	0	4.13577	10.015	17.1541	16.7422	1.37859	14.6371	-3.38366	0.0027619	0.0331164	Chr3B	Q9LX14.1 RecName: Full=Protein UPSTREAM OF FLC && PF06136:Domain of unknown function (DUF966)	-
TraesCS3B03G0992500	TraesCS3B02G397400	2.09973	5.53811	16.5431	36.4182	37.3355	96.9287	8.06031	56.8941	-2.81535	7.66e-06	0.00036235	Chr3B	Q9SR77.1 RecName: Full=Heme-binding-like protein At3g10130, chloroplastic; Flags: Precursor && PF04832:SOUL heme-binding protein	-
TraesCS3B03G0992800	TraesCS3B02G397500	94.488	60.9192	101.326	144.762	287.584	247.609	85.5779	226.652	-1.40261	1.49e-06	9.4e-05	Chr3B	Q9M394.1 RecName: Full=Fructokinase-like 1, chloroplastic; AltName: Full=PEP-associated protein 6; AltName: Full=pfkB-type carbohydrate kinase family protein 2; Flags: Precursor && PF00294:pfkB family carbohydrate k	PfkB
TraesCS3B03G0993700	TraesCS3B02G398300	47.244	11.0762	20.6789	152.957	191.723	88.9982	26.333	144.559	-2.45177	8.16e-09	1.16e-06	Chr3B	P46285.1 RecName: Full=Sedoheptulose-1,7-bisphosphatase, chloroplastic; AltName: Full=SED(1,7)P2ase; AltName: Full=Sedoheptulose bisphosphatase; Short=SBPase; Flags: Precursor && PF18913:Fructose-1-6-bisphosphatase,	-
TraesCS3B03G1002600	TraesCS3B02G401800	14.6981	4.43049	8.27154	31.866	33.2992	23.7916	9.13339	29.6523	-1.69278	0.00492775	0.0495653	Chr3B	PF00686:Starch binding domain	-
TraesCS3B03G1010400	TraesCS3B02G406000	0	1.10762	12.4073	46.4332	33.2992	19.3857	4.50498	33.0394	-2.8613	0.000486494	0.0092998	Chr3B	P23472.2 RecName: Full=Hevamine-A; Includes: RecName: Full=Chitinase; Includes: RecName: Full=Lysozyme; Flags: Precursor && PF00704:Glycosyl hydrolases family 18	-
TraesCS3B03G1024800	TraesCS3B02G413700	34.6456	19.9372	28.9504	271.316	342.074	75.7806	27.8444	229.723	-3.0412	8.28e-13	3.28e-10	Chr3B	Q9FPP4.1 RecName: Full=Photosystem II 22 kDa protein, chloroplastic; AltName: Full=CP22; Flags: Precursor && PF00504:Chlorophyll A-B binding protein	-
TraesCS3B03G1026200	TraesCS3B02G414800	197.375	434.188	362.914	680.11	669.012	891.744	331.492	746.955	-1.17289	6.44e-07	4.76e-05	Chr3B	Q0WP01.1 RecName: Full=Protein NRT1/ PTR FAMILY 5.10; Short=AtNPF5.10 && PF00854:POT family	-
TraesCS3B03G1026400	TraesCS3B02G414900	1.04987	1.10762	1.03394	2.73137	19.1723	18.5046	1.06381	13.4694	-3.66144	0.00294368	0.0347163	Chr3B	Q0WP01.1 RecName: Full=Protein NRT1/ PTR FAMILY 5.10; Short=AtNPF5.10 && PF00854:POT family	-
TraesCS3B03G1033000	TraesCS3B02G418800	1.04987	7.75336	2.06789	25.4928	13.1179	17.6234	3.6237	18.7447	-2.38777	0.00497384	0.0498635	Chr3B	Q9SS35.1 RecName: Full=Putative F-box protein At3g10240 && PF00646:F-box domain	F-box
TraesCS3B03G1040300	TraesCS3B02G422400	45.1443	28.7982	39.2898	84.6724	138.242	59.0384	37.7441	93.9843	-1.31148	0.000555869	0.0103012	Chr3B	Q0WPX7.1 RecName: Full=BAG family molecular chaperone regulator 2; AltName: Full=Bcl-2-associated athanogene 2 && PF00240:Ubiquitin family	ubiquitin
TraesCS3B03G1040700	TraesCS3B02G422500	10.4987	1.10762	6.20366	44.6123	25.2267	35.2468	5.93665	35.0286	-2.55267	0.000104391	0.00289837	Chr3B	Q9SNB7.1 RecName: Full=Pentatricopeptide repeat-containing protein At3g46610 && PF17177:Pentacotripeptide-repeat region of PRORP|PF13041:PPR repeat family	-
TraesCS3B03G1062300	TraesCS3B02G431200	11.5485	1.10762	4.13577	50.9855	35.3174	13.2176	5.59731	33.1735	-2.55876	0.00060032	0.0108849	Chr3B	Q8LPG9.1 RecName: Full=Protein IQ-DOMAIN 14 && -	-
TraesCS3B03G1067600	TraesCS3B02G432600	87.1389	83.0717	74.4439	185.733	245.203	149.799	81.5515	193.578	-1.24556	1.46e-06	9.28e-05	Chr3B	PF05697:Bacterial trigger factor protein (TF)	-
TraesCS3B03G1089400	TraesCS3B02G441000	9.4488	24.3677	13.4413	45.5228	64.5803	34.3656	15.7526	48.1562	-1.61452	0.00117532	0.0179818	Chr3B	Q9LVM2.1 RecName: Full=NAD(P)H-quinone oxidoreductase subunit N, chloroplastic; AltName: Full=NAD(P)H dehydrogenase subunit N; Short=NDH subunit N; Short=NDH-N; AltName: Full=NADH-plastoquinone oxidoreductase subuni	-
TraesCS3B03G1161800	TraesCS3B02G470200	61.9421	57.5964	45.4935	155.688	165.487	130.413	55.0107	150.529	-1.45213	9.17e-08	9.23e-06	Chr3B	Q9M7I9.1 RecName: Full=Stress enhanced protein 1, chloroplastic; Flags: Precursor && -	-
TraesCS3B03G1174300	TraesCS3B02G475100	48.2939	45.4125	45.4935	152.957	113.016	68.7313	46.4	111.568	-1.26491	0.000213498	0.00498437	Chr3B	Q9UU99.1 RecName: Full=CRAL-TRIO domain-containing protein C23B6.04c && PF00650:CRAL/TRIO domain	-
TraesCS3B03G1176100	TraesCS3B02G476000	47.244	28.7982	54.799	96.5083	95.8614	90.7605	43.6137	94.3767	-1.11038	0.000693926	0.0121285	Chr3B	Q9LSE2.1 RecName: Full=Transcription factor ICE1; AltName: Full=Basic helix-loop-helix protein 116; Short=AtbHLH116; Short=bHLH 116; AltName: Full=Inducer of CBF expression 1; AltName: Full=Transcription factor EN 4	HLH
TraesCS3B03G1180100	TraesCS3B02G477300	26.2467	17.722	7.2376	70.1051	104.943	32.6033	17.0687	69.2171	-2.01853	9.93e-05	0.00278638	Chr3B	Q9FG89.1 RecName: Full=Photosynthetic NDH subunit of subcomplex B 5, chloroplastic; Short=Protein PnsB5; AltName: Full=NAD(P)H dehydrogenase 18; Flags: Precursor && -	-
TraesCS3B03G1186200	TraesCS3B02G480000	0	1.10762	3.10183	23.6718	16.1451	10.574	1.40315	16.797	-3.57173	0.000760145	0.0129892	Chr3B	-	-
TraesCS3B03G1200900	TraesCS3B02G485100	27.2965	23.2601	33.0862	43.7019	54.4896	117.196	27.8809	71.7957	-1.36545	0.0017746	0.0242793	Chr3B	Q9LVD9.1 RecName: Full=Protein DETOXIFICATION 40; Short=AtDTX40; AltName: Full=Multidrug and toxic compound extrusion protein 40; Short=MATE protein 40 && PF01554:MatE	MatE
TraesCS3B03G1218900	TraesCS3B02G492300	45.1443	42.0897	65.1384	20.03	12.1088	26.4351	50.7908	19.5246	1.37303	0.00232281	0.0292384	Chr3B	PF00646:F-box domain	F-box
TraesCS3B03G1229500	TraesCS3B02G497700	0	0	0	8.1941	11.0997	0.88117	0	6.725	-5.09916	0.00498726	0.0499596	Chr3B	PF02298:Plastocyanin-like domain	Cu_bind_like
TraesCS3B03G1242400	TraesCS3B02G502100	640.418	716.632	643.112	288.614	224.013	258.183	666.721	256.937	1.37431	4.83e-17	4.55e-14	Chr3B	PF07762:Protein of unknown function (DUF1618)	-
TraesCS3B03G1276900	TraesCS3B02G514800	50.3936	46.5201	29.9843	159.33	136.224	153.324	42.2994	149.626	-1.82492	3.71e-10	7.77e-08	Chr3B	P13917.2 RecName: Full=Basic 7S globulin; AltName: Full=SBg7S; Short=Bg; Contains: RecName: Full=Basic 7S globulin high kDa subunit; Contains: RecName: Full=Basic 7S globulin low kDa subunit; Flags: Precursor && PF1	-
TraesCS3B03G1333200	TraesCS3B02G535100	72.4408	54.2735	48.5953	147.494	118.061	129.532	58.4365	131.696	-1.17277	3.09e-05	0.00110151	Chr3B	Q9LPR8.1 RecName: Full=Scarecrow-like protein 3; Short=AtSCL3; AltName: Full=GRAS family protein 5; Short=AtGRAS-5 && PF03514:GRAS domain family	GRAS
TraesCS3B03G1338300	TraesCS3B02G537600	35.6955	16.6143	25.8486	125.643	70.6347	53.7514	26.0528	83.343	-1.67523	8.25e-05	0.00238257	Chr3B	-	-
TraesCS3B03G1344800	TraesCS3B02G540000	30.4461	69.7802	34.1201	121.091	103.934	81.9488	44.7821	102.324	-1.19558	0.000902401	0.0147894	Chr3B	Q9C523.1 RecName: Full=Dirigent protein 19; Short=AtDIR19; Flags: Precursor && PF03018:Dirigent-like protein	-
TraesCS3B03G1353300	TraesCS3B02G544000	0	0	0	11.8359	10.0907	0.88117	0	7.60259	-5.27776	0.00286815	0.0340502	Chr3B	Q942A7.1 RecName: Full=Germin-like protein 1-4; Flags: Precursor && PF00190:Cupin	-
TraesCS3B03G1359300	TraesCS3B02G545700	0	0	0	5.46273	13.1179	10.574	0	9.71822	-5.63292	0.000374675	0.00758872	Chr3B	Q8GSM7.1 RecName: Full=Shikimate O-hydroxycinnamoyltransferase; AltName: Full=Hydroxycinnamoyl transferase; AltName: Full=Hydroxycinnamoyl-Coenzyme A shikimate/quinate hydroxycinnamoyltransferase && PF02458:Transfer	-
TraesCS3B03G1374700	TraesCS3B02G552400	1.04987	0	3.10183	18.2091	15.136	10.574	1.3839	14.6397	-3.38039	0.00181128	0.0246009	Chr3B	Q94CK9.1 RecName: Full=Protein LATERAL ROOT PRIMORDIUM 1 && PF05142:Domain of unknown function (DUF702)	-
TraesCS3B03G1402600	TraesCS3B02G561600	64.0418	49.843	46.5274	111.986	145.306	74.0183	53.4708	110.437	-1.04373	0.00145502	0.0210164	Chr3B	Q941F1.2 RecName: Full=Phospholipase A1-Igamma1, chloroplastic; Flags: Precursor && PF01764:Lipase (class 3)	Lipase_3
TraesCS3B03G1405400	TraesCS3B02G562700	0	0	0	12.7464	5.04534	1.76234	0	6.51802	-5.05853	0.00497537	0.0498717	Chr3B	Q6NKW9.2 RecName: Full=Glucan endo-1,3-beta-glucosidase 8; AltName: Full=(1->3)-beta-glucan endohydrolase 8; Short=(1->3)-beta-glucanase 8; AltName: Full=Beta-1,3-endoglucanase 8; Short=Beta-1,3-glucanase 8; Flags:	Glyco_hydro_17
TraesCS3B03G1407800	TraesCS3B02G563700	0	1.10762	4.13577	9.10456	32.2902	14.0987	1.7478	18.4978	-3.38822	0.00101233	0.0161102	Chr3B	Q9LVD9.1 RecName: Full=Protein DETOXIFICATION 40; Short=AtDTX40; AltName: Full=Multidrug and toxic compound extrusion protein 40; Short=MATE protein 40 && PF01554:MatE	MatE
TraesCS3B03G1419900	TraesCS3B02G568500	50.3936	99.686	67.2063	132.927	284.557	240.559	72.4286	219.348	-1.59968	4.38e-07	3.46e-05	Chr3B	Q0DVX2.2 RecName: Full=DEAD-box ATP-dependent RNA helicase 50 && PF00270:DEAD/DEAH box helicase|PF00271:Helicase conserved C-terminal domain	DEAD
TraesCS3B03G1425300	TraesCS3B02G569900	30.4461	46.5201	82.7154	11.8359	15.136	27.3163	53.2272	18.0961	1.5532	0.00201003	0.0263743	Chr3B	Q9SIT1.1 RecName: Full=Receptor-like kinase TMK3; AltName: Full=BARK1-like kinase 2; AltName: Full=Leucine-rich repeat receptor-like kinases TMK3; AltName: Full=Transmembrane kinase 3; Flags: Precursor && PF18052:Rx	Pkinase
TraesCS3B03G1433900	TraesCS3B02G573600	8.39893	21.0448	33.0862	0.910456	1.00907	4.40585	20.8433	2.10846	3.28298	0.000397762	0.00796152	Chr3B	Q6L400.1 RecName: Full=Putative late blight resistance protein homolog R1B-16 && -	-
TraesCS3B03G1442700	TraesCS3B02G578000	12.5984	4.43049	7.2376	40.9705	14.1269	31.7221	8.08883	28.9399	-1.83845	0.00495585	0.0497489	Chr3B	P84516.2 RecName: Full=Cationic peroxidase SPC4; Flags: Precursor && PF00141:Peroxidase	-
TraesCS3B03G1450000	TraesCS3B02G579800	15.748	5.53811	3.10183	36.4182	30.272	43.1773	8.12931	36.6225	-2.17137	0.000396494	0.00793841	Chr3B	-	-
TraesCS3B03G1473700	TraesCS3B02G589500	18.8976	17.722	25.8486	0	2.01813	3.52468	20.8227	1.84761	3.48919	0.000126342	0.00335507	Chr3B	Q39214.1 RecName: Full=Disease resistance protein RPM1; AltName: Full=Resistance to Pseudomonas syringae protein 3 && PF00931:NB-ARC domain|PF18052:Rx N-terminal domain	NB-ARC
TraesCS3B03G1490700	TraesCS3B02G596000	68.2413	131.807	147.854	33.6869	30.272	79.3053	115.967	47.7547	1.27525	0.00140295	0.0204924	Chr3B	PF08137:DVL family	-
TraesCS3B03G1515200	TraesCS3B02G608500	26.2467	36.5515	35.1541	110.165	96.8705	39.6527	32.6508	82.2294	-1.33146	0.00129573	0.019332	Chr3B	Q94CS9.1 RecName: Full=Probable aquaporin TIP1-2; AltName: Full=Tonoplast intrinsic protein 1-2; Short=OsTIP1;2 && PF00230:Major intrinsic protein	-
TraesCS3B03G1520500	TraesCS3B02G602500	139.632	103.009	125.107	19.1196	31.2811	51.1079	122.583	33.8362	1.85438	1.72e-07	1.57e-05	Chr3B	Q53RB0.1 RecName: Full=Probable linoleate 9S-lipoxygenase 4; AltName: Full=Lipoxygenase 4 && PF00305:Lipoxygenase|PF01477:PLAT/LH2 domain	Lipoxygenase
TraesCS3D03G0003900	TraesCS3D02G008500	139.632	177.22	117.869	88.3142	51.4624	71.3748	144.907	70.3838	1.038	0.000312943	0.00665948	Chr3D	Q8GUN6.1 RecName: Full=Chaperone protein dnaJ 50; Short=AtDjC50; Short=AtJ50 && PF00226:DnaJ domain	DnaJ
TraesCS3D03G0044300	TraesCS3D02G025000	53.5432	66.4573	43.4256	182.091	109.988	85.4735	54.4754	125.851	-1.20978	0.00033082	0.00690562	Chr3D	PF04577:Protein of unknown function (DUF563)	-
TraesCS3D03G0070400	TraesCS3D02G039300	831.494	822.963	726.862	2126.82	2618.53	1986.16	793.773	2243.84	-1.49902	6.55e-25	1.25e-21	Chr3D	PF14543:Xylanase inhibitor N-terminal|PF14541:Xylanase inhibitor C-terminal	-
TraesCS3D03G0075000	TraesCS3D02G041700	36.7453	25.4753	23.7807	107.434	59.535	77.543	28.6671	81.5039	-1.50857	7e-05	0.00208802	Chr3D	A3DH97.1 RecName: Full=Anti-sigma-I factor RsgI6; AltName: Full=Endo-1,4-beta-xylanase && PF02018:Carbohydrate binding domain|PF00331:Glycosyl hydrolase family 10	-
TraesCS3D03G0095000	TraesCS3D02G051800	44.0944	47.6278	43.4256	370.555	450.044	199.144	45.0492	339.915	-2.91498	7.35e-23	1.25e-19	Chr3D	P23993.1 RecName: Full=Photosystem I reaction center subunit XI, chloroplastic; Short=PSI-L; AltName: Full=PSI subunit V; Flags: Precursor && PF02605:Photosystem I reaction centre subunit XI	-
TraesCS3D03G0101000	TraesCS3D02G054600	169.028	110.762	134.413	294.988	440.962	327.795	138.068	354.582	-1.35878	2.57e-09	4.2e-07	Chr3D	B8AD72.1 RecName: Full=Probable zinc metalloprotease EGY2, chloroplastic; AltName: Full=Protein ETHYLENE-DEPENDENT GRAVITROPISM-DEFICIENT AND YELLOW-GREEN 2; Flags: Precursor && -	-
TraesCS3D03G0105400	TraesCS3D02G056400	26.2467	46.5201	89.953	6.37319	26.2357	19.3857	54.2399	17.3316	1.65215	0.00299338	0.0351289	Chr3D	Q9STE7.1 RecName: Full=Putative disease resistance RPP13-like protein 3 && PF00931:NB-ARC domain|PF18052:Rx N-terminal domain	NB-ARC
TraesCS3D03G0114800	TraesCS3D02G059900	472.44	356.654	386.695	826.694	1143.27	1252.14	405.263	1074.04	-1.40579	1.69e-14	1.05e-11	Chr3D	Q8W487.1 RecName: Full=Uncharacterized protein At2g39795, mitochondrial; Flags: Precursor && PF02330:Mitochondrial glycoprotein	-
TraesCS3D03G0116400	TraesCS3D02G060600	53.5432	21.0448	25.8486	95.5979	97.8795	74.0183	33.4789	89.1652	-1.41025	0.000239491	0.00544891	Chr3D	O22160.2 RecName: Full=Thylakoid lumenal 15 kDa protein 1, chloroplastic; AltName: Full=p15; Flags: Precursor && PF00805:Pentapeptide repeats (8 copies)	Pentapeptide
TraesCS3D03G0143200	TraesCS3D02G072900	33.5957	18.8296	14.4752	92.8665	78.7072	44.9397	22.3002	72.1711	-1.69282	0.000115361	0.00313754	Chr3D	PF04784:Protein of unknown function, DUF547|PF14389:Leucine-zipper of ternary complex factor MIP1	-
TraesCS3D03G0164300	TraesCS3D02G083400	118.635	74.2107	94.0888	212.136	251.258	143.631	95.6448	202.342	-1.07841	7.99e-05	0.00232206	Chr3D	Q9LW20.1 RecName: Full=Probable inactive shikimate kinase like 1, chloroplastic; Short=AtSKL1; Flags: Precursor && PF01202:Shikimate kinase	SKI
TraesCS3D03G0166700	TraesCS3D02G084300	15.748	7.75336	15.5091	36.4182	49.4443	29.0786	13.0035	38.3137	-1.55196	0.00286016	0.0339784	Chr3D	B8BKI7.1 RecName: Full=Probable bifunctional methylthioribulose-1-phosphate dehydratase/enolase-phosphatase E1; Includes: RecName: Full=Methylthioribulose-1-phosphate dehydratase; Short=MTRu-1-P dehydratase; Include	Hydrolase
TraesCS3D03G0167500	TraesCS3D02G084800	20.9973	16.6143	14.4752	50.0751	60.544	26.4351	17.3623	45.6847	-1.39264	0.00404818	0.0435514	Chr3D	Q67YC9.1 RecName: Full=Uncharacterized protein At4g14100; Flags: Precursor && -	-
TraesCS3D03G0172600	TraesCS3D02G087600	123.884	78.6412	110.632	194.838	267.403	197.382	104.386	219.874	-1.072	1.57e-05	0.000644018	Chr3D	PF08373:RAP domain	-
TraesCS3D03G0173000	TraesCS3D02G087800	107.086	88.6098	64.1045	325.943	162.46	81.9488	86.6002	190.117	-1.13467	0.00300326	0.0351928	Chr3D	Q8L5Z1.1 RecName: Full=GDSL esterase/lipase At1g33811; AltName: Full=Extracellular lipase At1g33811; Flags: Precursor && PF00657:GDSL-like Lipase/Acylhydrolase	Lipase_GDSL
TraesCS3D03G0188000	TraesCS3D02G094800	16.7979	21.0448	7.2376	101.061	31.2811	64.3254	15.0268	65.5557	-2.13196	3.92e-05	0.00133321	Chr3D	Q0WVN5.2 RecName: Full=Cellulose synthase-like protein G3; Short=AtCslG3 && PF03552:Cellulose synthase	-
TraesCS3D03G0188900	TraesCS3D02G095100	5.24933	3.32287	4.13577	21.8509	31.2811	14.0987	4.23599	22.4102	-2.39707	0.00126853	0.0190525	Chr3D	-	-
TraesCS3D03G0195800	TraesCS3D02G098000	68.2413	63.1345	37.2219	16.3882	24.2176	14.9799	56.1992	18.5286	1.60585	0.000282279	0.0061727	Chr3D	PF10181:GPI-GlcNAc transferase complex, PIG-H component	-
TraesCS3D03G0218200	TraesCS3D02G105800	81.8896	54.2735	88.9191	211.226	223.004	211.481	75.0274	215.237	-1.51773	7.11e-10	1.36e-07	Chr3D	Q9SN45.2 RecName: Full=Protein DOG1-like 2 && PF14144:Seed dormancy control	-
TraesCS3D03G0226500	TraesCS3D02G109800	0	0	0	10.9255	12.1088	7.93053	0	10.3216	-5.72023	0.000222679	0.00515247	Chr3D	Q9SJL7.1 RecName: Full=Transcription factor RAX2; AltName: Full=Myb-related protein 38; Short=AtMYB38; AltName: Full=Protein REGULATOR OF AXILLARY MERISTEMS 2 && PF00249:Myb-like DNA-binding domain	Myb_DNA-binding
TraesCS3D03G0235300	TraesCS3D02G113000	47.244	49.843	33.0862	85.5828	96.8705	79.3053	43.3911	87.2529	-1.00839	0.0017944	0.0244464	Chr3D	-	-
TraesCS3D03G0236000	TraesCS3D02G113500	30.4461	24.3677	20.6789	81.0306	77.6982	78.4241	25.1642	79.051	-1.65171	4.14e-06	0.000221697	Chr3D	-	-
TraesCS3D03G0263500	TraesCS3D02G125500	3.1496	2.21524	8.27154	27.3137	37.3355	24.6728	4.54546	29.774	-2.69957	9.45e-05	0.00267346	Chr3D	Q9FMF5.2 RecName: Full=Root phototropism protein 3; AltName: Full=BTB/POZ domain-containing protein RPT3; AltName: Full=Non-phototropic hypocotyl protein 3 && PF03000:NPH3 family	-
TraesCS3D03G0270400	TraesCS3D02G128500	0	2.21524	0	7.28365	6.0544	29.9598	0.738415	14.4326	-4.33499	0.00181956	0.0246545	Chr3D	Q9ZWR8.1 RecName: Full=Anthocyanin 5-aromatic acyltransferase; Short=5AT && PF02458:Transferase family	-
TraesCS3D03G0274100	TraesCS3D02G129800	190.026	105.224	254.35	330.495	329.965	488.168	183.2	382.876	-1.06252	9.42e-05	0.00266595	Chr3D	Q9SM50.1 RecName: Full=Transcription factor HY5; AltName: Full=LeHY5; AltName: Full=tHY5 && PF00170:bZIP transcription factor	bZIP_1
TraesCS3D03G0289400	TraesCS3D02G137700	15.748	13.2915	13.4413	60.0901	70.6347	46.702	14.1602	59.1423	-2.05994	2.85e-06	0.00016139	Chr3D	PF07498:Rho termination factor, N-terminal domain	-
TraesCS3D03G0289600	TraesCS3D02G137800	112.336	77.5336	68.2402	162.972	214.931	223.817	86.0365	200.573	-1.22067	3e-06	0.000168584	Chr3D	Q9SN39.1 RecName: Full=Pentatricopeptide repeat-containing protein DOT4, chloroplastic; AltName: Full=Protein DEFECTIVELY ORGANIZED TRIBUTARIES 4; AltName: Full=Protein FLAVODENTATA; Flags: Precursor && PF14432:DYW	-
TraesCS3D03G0309800	TraesCS3D02G145400	3.1496	9.9686	12.4073	38.2391	9.08161	59.0384	8.5085	35.453	-2.06333	0.00338679	0.0384154	Chr3D	A5H8G4.1 RecName: Full=Peroxidase 1; AltName: Full=Plasma membrane-bound peroxidase 1; Short=pmPOX1; Flags: Precursor && PF00141:Peroxidase	-
TraesCS3D03G0318400	TraesCS3D02G150700	0	0	0	14.5673	8.07254	0.88117	0	7.84033	-5.32361	0.00258465	0.0315385	Chr3D	P81898.2 RecName: Full=Peptide-N4-(N-acetyl-beta-glucosaminyl)asparagine amidase A; Short=PNGase A; AltName: Full=Glycopeptide N-glycosidase; AltName: Full=N-glycanase; Contains: RecName: Full=Peptide-N4-(N-acetyl-b	-
TraesCS3D03G0330600	TraesCS3D02G155700	46.1941	23.2601	29.9843	71.926	108.979	66.9689	33.1462	82.6247	-1.31343	0.000516224	0.00974208	Chr3D	Q5NAY7.2 RecName: Full=GDT1-like protein 1, chloroplastic; Flags: Precursor && PF01169:Uncharacterized protein family UPF0016	-
TraesCS3D03G0338100	TraesCS3D02G158600	27.2965	18.8296	7.2376	45.5228	48.4352	47.5832	17.7879	47.1804	-1.40895	0.0040246	0.0434249	Chr3D	P46518.1 RecName: Full=Late embryogenesis abundant protein Lea14-A && PF03168:Late embryogenesis abundant protein	-
TraesCS3D03G0355900	TraesCS3D02G165800	8.39893	5.53811	11.3734	53.7169	66.5984	49.3455	8.4368	56.5536	-2.73732	4.27e-08	4.89e-06	Chr3D	-	-
TraesCS3D03G0361700	TraesCS3D02G167600	2.09973	1.10762	4.13577	22.7614	34.3083	30.841	2.44771	29.3035	-3.56788	5.94e-06	0.000294258	Chr3D	P52579.1 RecName: Full=Isoflavone reductase homolog A622 && PF05368:NmrA-like family	NmrA
TraesCS3D03G0371900	TraesCS3D02G170400	100.787	45.4125	56.8669	151.136	133.197	137.463	67.6888	140.598	-1.05324	0.000610039	0.0110181	Chr3D	Q5BKS4.1 RecName: Full=ERI1 exoribonuclease 2; AltName: Full=Exonuclease domain-containing protein 1 && PF00929:Exonuclease	Exonuc_X-T
TraesCS3D03G0373500	TraesCS3D02G171100	0	4.43049	1.03394	20.03	29.263	7.93053	1.82148	19.0745	-3.40819	0.000827578	0.0138462	Chr3D	Q8VXX5.1 RecName: Full=Monocopper oxidase-like protein SKS1; Flags: Precursor && PF07731:Multicopper oxidase|PF00394:Multicopper oxidase|PF07732:Multicopper oxidase	-
TraesCS3D03G0390200	TraesCS3D02G180000	109.186	153.96	198.517	41.881	87.7889	74.8995	153.888	68.1898	1.17675	0.000236187	0.00538974	Chr3D	-	-
TraesCS3D03G0404000	TraesCS3D02G185900	41.9947	69.7802	97.1906	168.434	160.442	192.976	69.6552	173.951	-1.32026	7.32e-06	0.000350217	Chr3D	-	-
TraesCS3D03G0419900	TraesCS3D02G193000	13.6483	14.3991	10.3394	31.866	50.4534	29.9598	12.7956	37.4264	-1.54698	0.00264777	0.0320712	Chr3D	-	-
TraesCS3D03G0423000	TraesCS3D02G194300	314.96	222.632	310.183	641.871	859.725	654.709	282.592	718.769	-1.34534	1.07e-12	4.02e-10	Chr3D	Q5EFU4.1 RecName: Full=Magnesium-protoporphyrin IX monomethyl ester [oxidative] cyclase, chloroplastic; Short=Mg-protoporphyrin IX monomethyl ester oxidative cyclase; AltName: Full=Protein Xantha-l; Flags: Precursor	-
TraesCS3D03G0502500	TraesCS3D02G211700	28.3464	1.10762	4.13577	36.4182	73.6619	47.5832	11.1966	52.5544	-2.22475	0.00116781	0.0179013	Chr3D	Q38932.2 RecName: Full=Lycopene epsilon cyclase, chloroplastic; AltName: Full=Protein LUTEIN DEFICIENT 2; Flags: Precursor && PF05834:Lycopene cyclase protein	-
TraesCS3D03G0506700	TraesCS3D02G212900	1.04987	0	1.03394	18.2091	26.2357	14.9799	0.694603	19.8083	-4.80758	0.000106324	0.00293528	Chr3D	PF06549:Protein of unknown function (DUF1118)	-
TraesCS3D03G0519300	TraesCS3D02G217800	34.6456	27.6906	35.1541	122.001	77.6982	131.294	32.4967	110.331	-1.76408	1.85e-07	1.66e-05	Chr3D	Q2V9B0.1 RecName: Full=Transcription factor MYB1R1; AltName: Full=Myb-related protein R1; Short=StMYB1R-1 && PF00249:Myb-like DNA-binding domain	Myb_DNA-binding
TraesCS3D03G0527700	TraesCS3D02G233300	20.9973	22.1524	19.6449	52.8064	51.4624	43.1773	20.9316	49.1487	-1.23144	0.00308613	0.0358712	Chr3D	Q54T49.1 RecName: Full=Acyl-protein thioesterase 1 homolog 1 && PF02230:Phospholipase/Carboxylesterase	Abhydrolase_2
TraesCS3D03G0542300	TraesCS3D02G226300	0	0	0	9.10456	5.04534	7.04936	0	7.06642	-5.17671	0.00226323	0.0286592	Chr3D	Q8VWJ2.1 RecName: Full=Probable WRKY transcription factor 28; AltName: Full=WRKY DNA-binding protein 28 && PF03106:WRKY DNA -binding domain	WRKY
TraesCS3D03G0542800	TraesCS3D02G226100	0	3.32287	0	18.2091	12.1088	7.93053	1.10762	12.7495	-3.56213	0.00397322	0.042997	Chr3D	H2DH21.1 RecName: Full=Cytochrome P450 CYP72A219; AltName: Full=Cytochrome P450 CYP72A129 [Panax ginseng] && PF00067:Cytochrome P450	p450
TraesCS3D03G0544700	TraesCS3D02G224800	681.363	388.775	458.037	1017.89	1275.46	977.218	509.392	1090.19	-1.09703	3.59e-08	4.2e-06	Chr3D	Q9FWS4.1 RecName: Full=50S ribosomal protein L31, chloroplastic; AltName: Full=CL31; AltName: Full=Protein EMBRYO DEFECTIVE 2184; Flags: Precursor && PF01197:Ribosomal protein L31	-
TraesCS3D03G0546500	TraesCS3D02G223900	33.5957	38.7668	56.8669	75.5678	115.034	73.1371	43.0765	87.9129	-1.02552	0.00334552	0.0380649	Chr3D	Q949Z1.1 RecName: Full=Polygalacturonase At1g48100; Short=PG; AltName: Full=Pectinase At1g48100; Flags: Precursor && PF00295:Glycosyl hydrolases family 28	-
TraesCS3D03G0556300	TraesCS3D02G235300	9.4488	13.2915	4.13577	40.0601	46.4171	29.9598	8.95868	38.8123	-2.12047	0.000172611	0.00424519	Chr3D	Q9LI74.1 RecName: Full=Protein CHUP1, chloroplastic; AltName: Full=Protein CHLOROPLAST UNUSUAL POSITIONING 1 && -	-
TraesCS3D03G0574300	TraesCS3D02G244200	50.3936	37.6592	59.9687	109.255	176.587	155.967	49.3405	147.27	-1.57437	1.99e-07	1.75e-05	Chr3D	O22959.1 RecName: Full=Peroxidase 19; Short=Atperox P19; AltName: Full=ATP51; Flags: Precursor && PF00141:Peroxidase	-
TraesCS3D03G0588400	TraesCS3D02G250700	1.04987	0	0	5.46273	14.1269	8.8117	0.349955	9.46713	-4.63203	0.00302075	0.0353443	Chr3D	Q9SJQ1.1 RecName: Full=Leucine-rich repeat receptor-like protein kinase PXC1; AltName: Full=Protein PXY/TDR-CORRELATED 1; Flags: Precursor && PF08263:Leucine rich repeat N-terminal domain|PF13855:Leucine rich repeat	Pkinase_Tyr
TraesCS3D03G0590600	TraesCS3D02G251900	39.8949	15.5067	18.611	59.1796	45.408	81.9488	24.6709	62.1788	-1.33361	0.00289742	0.0343041	Chr3D	Q8LR50.1 RecName: Full=Probable cytokinin riboside 5'-monophosphate phosphoribohydrolase LOGL1; AltName: Full=Protein LONELY GUY-like 1 && PF03641:Possible lysine decarboxylase	-
TraesCS3D03G0593400	TraesCS3D02G253000	23.0971	39.8744	63.0705	19.1196	14.1269	9.69287	42.014	14.3131	1.55549	0.00334343	0.0380545	Chr3D	-	-
TraesCS3D03G0595600	TraesCS3D02G253900	54.593	83.0717	32.0522	107.434	142.278	119.839	56.5723	123.184	-1.12515	0.000782755	0.0132973	Chr3D	Q8VZV9.1 RecName: Full=Protein PLASTID TRANSCRIPTIONALLY ACTIVE 7; Short=pTAC7; AltName: Full=Protein PIGMENT DEFECTIVE 225; Flags: Precursor && -	-
TraesCS3D03G0599700	TraesCS3D02G256600	1.04987	2.21524	5.16971	10.9255	12.1088	66.9689	2.81161	30.0011	-3.41344	0.000168148	0.00416252	Chr3D	Q40541.1 RecName: Full=Mitogen-activated protein kinase kinase kinase NPK1; AltName: Full=Nicotiana protein kinase 1 && PF00069:Protein kinase domain	Pkinase
TraesCS3D03G0600000	TraesCS3D02G256700	134.383	69.7802	73.4099	210.315	261.348	155.967	92.5243	209.21	-1.17494	6.26e-05	0.00191373	Chr3D	Q9STF2.1 RecName: Full=Protein plastid transcriptionally active 16, chloroplastic; Short=pTAC16; Flags: Precursor && PF13460:NAD(P)H-binding	-
TraesCS3D03G0606700	TraesCS3D02G260300	0	0	0	30.045	4.03627	10.574	0	14.8851	-6.2527	4.33e-05	0.00144144	Chr3D	P11955.4 RecName: Full=26 kDa endochitinase 1; Flags: Precursor && PF00187:Chitin recognition protein|PF00182:Chitinase class I	-
TraesCS3D03G0623300	TraesCS3D02G269500	30.4461	14.3991	15.5091	48.2542	67.6075	38.7715	20.1181	51.5444	-1.35297	0.00340692	0.0385935	Chr3D	-	-
TraesCS3D03G0639500	TraesCS3D02G276200	5.24933	5.53811	1.03394	10.9255	10.0907	44.0585	3.94046	21.6915	-2.47144	0.00456224	0.047112	Chr3D	O49545.1 RecName: Full=Leucine-rich repeat receptor-like serine/threonine-protein kinase BAM1; AltName: Full=Protein BARELY ANY MERISTEM 1; Flags: Precursor && PF07714:Protein tyrosine and serine/threonine kinase|PF	Pkinase_Tyr
TraesCS3D03G0640300	TraesCS3D02G276500	44.0944	69.7802	44.4595	86.4933	154.387	161.254	52.778	134.045	-1.34654	4.03e-05	0.00136042	Chr3D	Q76NT0.1 RecName: Full=rRNA methyltransferase 1, mitochondrial; AltName: Full=rRNA (guanosine-2'-O)-methyltransferase; Flags: Precursor && PF08032:RNA 2'-O ribose methyltransferase substrate binding|PF00588:SpoU rRN	SpoU_methylase
TraesCS3D03G0647100	TraesCS3D02G279800	49.3437	49.843	29.9843	87.4038	92.8342	141.868	43.057	107.369	-1.32134	9.44e-05	0.00267158	Chr3D	Q4R1I9.1 RecName: Full=Anthocyanidin 5,3-O-glucosyltransferase; AltName: Full=UDP-glucose: anthocyanidin 5,3-O-glucosyltransferase && PF00201:UDP-glucoronosyl and UDP-glucosyl transferase	UDPGT
TraesCS3D03G0661400	TraesCS3D02G287300	5.24933	4.43049	5.16971	3.64182	67.6075	108.384	4.94985	59.8778	-3.59564	6.42e-06	0.000313927	Chr3D	Q9FZ62.1 RecName: Full=Inorganic pyrophosphatase 2; Short=AtPPsPase2; Short=PPi phosphatase 2; Short=Pyrophosphate-specific phosphatase 2 && PF06888:Putative Phosphatase	-
TraesCS3D03G0679000	TraesCS3D02G295400	16.7979	7.75336	11.3734	65.5528	39.3536	20.2669	11.9749	41.7245	-1.79743	0.00162136	0.0227553	Chr3D	PF14009:Domain of unknown function (DUF4228)	-
TraesCS3D03G0681700	TraesCS3D02G296800	9.4488	13.2915	14.4752	24.5823	32.2902	58.1572	12.4052	38.3432	-1.63038	0.00263215	0.0319389	Chr3D	Q5JMF2.1 RecName: Full=Probable protein ABIL5; AltName: Full=Abl interactor-like protein 5 && -	-
TraesCS3D03G0683000	TraesCS3D02G297900	185.826	291.305	226.433	367.824	545.905	510.198	234.522	474.642	-1.01759	1.96e-06	0.00011802	Chr3D	F4JKH6.1 RecName: Full=Protein TSS; AltName: Full=TPR-domain suppressor of STIMPY && PF13424:Tetratricopeptide repeat|PF15044:Mitochondrial function, CLU-N-term|PF12807:Translation initiation factor eIF3 subunit 135	-
TraesCS3D03G0684800	TraesCS3D02G298900	143.832	73.1031	104.428	233.987	261.348	252.896	107.121	249.41	-1.21741	1.04e-06	7.02e-05	Chr3D	Q9FME3.1 RecName: Full=Transcription factor TCP5 && PF03634:TCP family transcription factor	TCP
TraesCS3D03G0694500	TraesCS3D02G304800	251.968	304.596	258.486	598.169	738.637	695.243	271.683	677.35	-1.31832	1.97e-15	1.43e-12	Chr3D	F4IHY7.1 RecName: Full=Protein PLASTID TRANSCRIPTIONALLY ACTIVE 12; Short=pTAC12; AltName: Full=Plastid-encoded RNA polymerase-associated protein 5; Short=PEP-associated protein 5; AltName: Full=Protein HEMERA; Flag	-
TraesCS3D03G0695400	TraesCS3D02G305300	0	0	3.10183	39.1496	16.1451	58.1572	1.03394	37.8173	-5.16434	6.97e-07	5.04e-05	Chr3D	Q9FEQ8.1 RecName: Full=Peroxidase 2; AltName: Full=Plasma membrane-bound peroxidase 2; Short=pmPOX2; Flags: Precursor && PF00141:Peroxidase	-
TraesCS3D03G0697200	TraesCS3D02G306100	0	0	0	14.5673	4.03627	3.52468	0	7.37608	-5.23846	0.00246072	0.0304685	Chr3D	PF06830:Root cap	-
TraesCS3D03G0704700	TraesCS3D02G309700	7.34906	0	10.3394	153.867	84.7617	153.324	5.89616	130.651	-4.45098	2.32e-18	2.61e-15	Chr3D	PF03126:Plus-3 domain	-
TraesCS3D03G0721900	TraesCS3D02G319100	16.7979	21.0448	18.611	73.7469	67.6075	39.6527	18.8179	60.3357	-1.68051	9.81e-05	0.00275642	Chr3D	Q9T076.1 RecName: Full=Early nodulin-like protein 2; AltName: Full=Phytocyanin-like protein; Flags: Precursor && PF02298:Plastocyanin-like domain	Cu_bind_like
TraesCS3D03G0732500	TraesCS3D02G324400	57.7426	76.4259	41.3577	128.374	128.152	115.433	58.5088	123.986	-1.08579	0.000234217	0.00536263	Chr3D	Q8S2G0.1 RecName: Full=4-diphosphocytidyl-2-C-methyl-D-erythritol kinase, chloroplastic; AltName: Full=4-(cytidine-5'-diphospho)-2-C-methyl-D-erythritol kinase; Short=CDPMEK; Short=CMEK; Flags: Precursor && PF00288:	GHMP_kinases
TraesCS3D03G0735000	TraesCS3D02G325900	58.7925	42.0897	35.1541	109.255	113.016	89.8794	45.3454	104.05	-1.19729	0.000151152	0.00384431	Chr3D	PF11460:Protein of unknown function (DUF3007)	-
TraesCS3D03G0746600	TraesCS3D02G332200	83.9893	64.2421	103.394	79.2097	199.795	294.311	83.8752	191.105	-1.18739	0.00128499	0.0192408	Chr3D	Q9SGA2.1 RecName: Full=Glycerophosphodiester phosphodiesterase GDPD1, chloroplastic; AltName: Full=Glycerophosphodiester phosphodiesterase 1; Short=AtGDPD1; AltName: Full=Protein SENESCENCE-RELATED GENE 3; Flags: Pr	-
TraesCS3D03G0757800	TraesCS3D02G338400	242.519	310.134	292.606	122.001	151.36	125.126	281.753	132.829	1.08625	1.75e-07	1.59e-05	Chr3D	Q40636.2 RecName: Full=Expansin-A2; AltName: Full=Alpha-expansin-2; AltName: Full=OsEXP2; AltName: Full=OsEXPA2; AltName: Full=OsaEXPa1.23; AltName: Full=RiExB; AltName: Full=RiExC; Flags: Precursor && PF03330:Lytic	-
TraesCS3D03G0761600	TraesCS3D02G340800	854.591	510.614	619.332	2377.2	2187.66	2859.4	661.512	2474.75	-1.90322	1.24e-25	2.48e-22	Chr3D	P59259.2 RecName: Full=Histone H4 >Q6LAF3.3 RecName: Full=Histone H4 >Q6PMI5.3 RecName: Full=Histone H4 >Q6WZ83.3 RecName: Full=Histone H4 >Q76H85.3 RecName: Full=Histone H4 >P62788.2 RecName: Full=Histone H4 >P6278	-
TraesCS3D03G0761700	TraesCS3D02G340900	49.3437	52.0583	52.7311	14.5673	27.2448	10.574	51.3777	17.4621	1.56783	0.000633184	0.0113334	Chr3D	PF04749:PLAC8 family|PF11204:Protein of unknown function (DUF2985)	-
TraesCS3D03G0764500	TraesCS3D02G342400	123.884	79.7488	88.9191	460.691	786.063	526.059	97.5174	590.938	-2.59751	1.8e-27	4.19e-24	Chr3D	Q43217.3 RecName: Full=Histone H2B.3; AltName: Full=wcH2B-8 && PF00125:Core histone H2A/H2B/H3/H4	Histone
TraesCS3D03G0765100	TraesCS3D02G342900	136.483	120.731	141.65	228.524	264.376	316.34	132.955	269.747	-1.02043	1.74e-06	0.000106961	Chr3D	-	-
TraesCS3D03G0769200	TraesCS3D02G345600	0	0	0	13.6568	5.04534	7.04936	0	8.58384	-5.45769	0.000841954	0.0140363	Chr3D	Q9ZSA7.1 RecName: Full=Protein DMR6-LIKE OXYGENASE 2; AltName: Full=2-oxoglutarate (2OG)-Fe(II) oxygenase-like protein DLO2; AltName: Full=Salicylate 3-hydroxylase DLO2; Short=S3H DLO2; Short=SA 3-hydroxylase DLO2;	2OG-FeII_Oxy
TraesCS3D03G0772500	TraesCS3D02G347600	137.532	125.161	67.2063	291.346	149.342	305.766	109.967	248.818	-1.18027	0.000120453	0.00323691	Chr3D	-	-
TraesCS3D03G0777300	TraesCS3D02G350800	0	0	0	14.5673	9.08161	6.16819	0	9.93903	-5.66701	0.000322733	0.00679113	Chr3D	Q9LX14.1 RecName: Full=Protein UPSTREAM OF FLC && PF06136:Domain of unknown function (DUF966)	-
TraesCS3D03G0796400	TraesCS3D02G358800	82.9394	98.5784	119.937	203.032	296.666	356.874	100.485	285.524	-1.50637	3.05e-09	4.88e-07	Chr3D	Q9M394.1 RecName: Full=Fructokinase-like 1, chloroplastic; AltName: Full=PEP-associated protein 6; AltName: Full=pfkB-type carbohydrate kinase family protein 2; Flags: Precursor && PF00294:pfkB family carbohydrate k	PfkB
TraesCS3D03G0797700	TraesCS3D02G359900	13.6483	4.43049	5.16971	51.896	84.7617	23.7916	7.74949	53.4831	-2.78009	4.94e-06	0.000254275	Chr3D	P46285.1 RecName: Full=Sedoheptulose-1,7-bisphosphatase, chloroplastic; AltName: Full=SED(1,7)P2ase; AltName: Full=Sedoheptulose bisphosphatase; Short=SBPase; Flags: Precursor && PF00316:Fructose-1-6-bisphosphatase,	-
TraesCS3D03G0805700	TraesCS3D02G364300	3.1496	6.64573	21.7128	35.5078	20.1813	88.9982	10.5027	48.2291	-2.19725	0.00106049	0.0166818	Chr3D	Q9ZUX1.1 RecName: Full=Cytochrome P450 94C1 && PF00067:Cytochrome P450	p450
TraesCS3D03G0811100	TraesCS3D02G366500	25.1968	17.722	20.6789	81.941	57.5168	57.2761	21.1992	65.578	-1.6283	4.8e-05	0.00155678	Chr3D	P23472.2 RecName: Full=Hevamine-A; Includes: RecName: Full=Chitinase; Includes: RecName: Full=Lysozyme; Flags: Precursor && PF00704:Glycosyl hydrolases family 18	-
TraesCS3D03G0814000	TraesCS3D02G368200	30.4461	32.1211	36.188	51.896	71.6438	87.2358	32.9184	70.2585	-1.09378	0.00282936	0.0336756	Chr3D	-	-
TraesCS3D03G0826800	TraesCS3D02G374200	116.535	103.009	67.2063	307.734	309.784	157.729	95.5834	258.416	-1.43457	8.71e-07	6.04e-05	Chr3D	P54773.1 RecName: Full=Photosystem II 22 kDa protein, chloroplastic; AltName: Full=CP22; Flags: Precursor && PF00504:Chlorophyll A-B binding protein	-
TraesCS3D03G0829300	TraesCS3D02G375900	338.057	501.753	331.896	981.471	1106.95	852.092	390.569	980.17	-1.32802	8.94e-13	3.44e-10	Chr3D	Q0WP01.1 RecName: Full=Protein NRT1/ PTR FAMILY 5.10; Short=AtNPF5.10 && PF00854:POT family	-
TraesCS3D03G0833700	TraesCS3D02G377200	29.3963	9.9686	23.7807	52.8064	66.5984	72.256	21.0485	63.8869	-1.59704	0.000242075	0.00550051	Chr3D	Q9QX60.3 RecName: Full=Deoxyguanosine kinase, mitochondrial; Short=dGK; Flags: Precursor && PF01712:Deoxynucleoside kinase	-
TraesCS3D03G0857800	TraesCS3D02G387600	364.304	204.91	322.59	644.603	905.133	915.536	297.268	821.757	-1.46591	6.38e-12	2.01e-09	Chr3D	F4JF21.1 RecName: Full=Protein PLASTID TRANSCRIPTIONALLY ACTIVE 10; Short=pTAC10; AltName: Full=Plastid-encoded RNA polymerase-associated protein 3; Short=PEP-associated protein 3; AltName: Full=Protein PIGMENT DEFE	-
TraesCS3D03G0869500	TraesCS3D02G393700	76.6402	55.3811	45.4935	134.747	228.049	130.413	59.1716	164.403	-1.47223	2.16e-06	0.000128334	Chr3D	-	-
TraesCS3D03G0886900	TraesCS3D02G402500	38.8451	13.2915	24.8146	75.5678	92.8342	40.5338	25.6504	69.6453	-1.43562	0.00157222	0.0222254	Chr3D	Q9LVM2.1 RecName: Full=NAD(P)H-quinone oxidoreductase subunit N, chloroplastic; AltName: Full=NAD(P)H dehydrogenase subunit N; Short=NDH subunit N; Short=NDH-N; AltName: Full=NADH-plastoquinone oxidoreductase subuni	-
TraesCS3D03G0901200	TraesCS3D02G409800	0	0	0	10.9255	9.08161	0.88117	0	6.96275	-5.15098	0.00425648	0.045035	Chr3D	PF01657:Salt stress response/antifungal	-
TraesCS3D03G0908400	TraesCS3D02G413900	49.3437	32.1211	21.7128	93.7769	100.907	86.3547	34.3925	93.6794	-1.44531	4.69e-05	0.00152975	Chr3D	Q8S091.1 RecName: Full=Thioredoxin F, chloroplastic; Short=OsTrxf; AltName: Full=OsTrx03; Flags: Precursor && PF00085:Thioredoxin	-
TraesCS3D03G0915800	TraesCS3D02G417600	3.1496	0	4.13577	38.2391	21.1904	18.5046	2.42846	25.978	-3.40116	5.76e-05	0.00179167	Chr3D	Q84MB3.1 RecName: Full=1-aminocyclopropane-1-carboxylate oxidase homolog 1 && PF03171:2OG-Fe(II) oxygenase superfamily|PF14226:non-haem dioxygenase in morphine synthesis N-terminal	2OG-FeII_Oxy
TraesCS3D03G0936800	TraesCS3D02G426300	157.48	177.22	144.752	401.511	497.47	256.421	159.817	385.134	-1.26825	1.17e-07	1.14e-05	Chr3D	Q9M158.2 RecName: Full=Rhodanese-like domain-containing protein 4, chloroplastic; AltName: Full=Protein THYLAKOID RHODANESE-LIKE; AltName: Full=Sulfurtransferase 4; Short=AtStr4; Flags: Precursor && -	-
TraesCS3D03G0958800	TraesCS3D02G436100	39.8949	43.1973	28.9504	147.494	172.551	76.6618	37.3475	132.235	-1.8237	2.61e-07	2.22e-05	Chr3D	Q9FG89.1 RecName: Full=Photosynthetic NDH subunit of subcomplex B 5, chloroplastic; Short=Protein PnsB5; AltName: Full=NAD(P)H dehydrogenase 18; Flags: Precursor && -	-
TraesCS3D03G0965300	TraesCS3D02G439700	1.04987	2.21524	2.06789	23.6718	16.1451	9.69287	1.77767	16.5033	-3.21717	0.00105549	0.0166375	Chr3D	PF05553:Cotton fibre expressed protein	-
TraesCS3D03G0966500	TraesCS3D02G440200	0	0	0	14.5673	17.1541	1.76234	0	11.1613	-5.83088	0.000312764	0.00665769	Chr3D	Q5JK35.1 RecName: Full=Beta-glucosidase 5; Short=Os1bglu5; Flags: Precursor && PF00232:Glycosyl hydrolase family 1	Glyco_hydro_1
TraesCS3D03G0966900	TraesCS3D02G440500	4.19947	4.43049	7.2376	19.1196	29.263	29.9598	5.28918	26.1141	-2.29976	0.000617989	0.0111271	Chr3D	Q5JK35.1 RecName: Full=Beta-glucosidase 5; Short=Os1bglu5; Flags: Precursor && PF00232:Glycosyl hydrolase family 1	Glyco_hydro_1
TraesCS3D03G0998500	TraesCS3D02G453400	7.34906	13.2915	21.7128	0	2.01813	2.64351	14.1178	1.55388	3.18632	0.00279928	0.0334032	Chr3D	Q9FNK0.1 RecName: Full=Putative F-box/FBD/LRR-repeat protein At5g22610 && PF00646:F-box domain|PF08387:FBD	F-box
TraesCS3D03G1000600	TraesCS3D02G454600	0	1.10762	5.16971	73.7469	110.997	29.9598	2.09245	71.568	-5.0769	8.72e-11	2.12e-08	Chr3D	-	-
TraesCS3D03G1007500	TraesCS3D02G457800	20.9973	13.2915	19.6449	78.2992	102.925	44.0585	17.9779	75.0942	-2.05707	2.74e-06	0.000156445	Chr3D	PF04819:Family of unknown function (DUF716)	-
TraesCS3D03G1030800	TraesCS3D02G467600	18.8976	57.5964	43.4256	162.972	74.671	168.303	39.9732	135.315	-1.76329	9.3e-06	0.000420519	Chr3D	P13917.2 RecName: Full=Basic 7S globulin; AltName: Full=SBg7S; Short=Bg; Contains: RecName: Full=Basic 7S globulin high kDa subunit; Contains: RecName: Full=Basic 7S globulin low kDa subunit; Flags: Precursor && PF1	-
TraesCS3D03G1083000	TraesCS3D02G489700	3.1496	3.32287	0	15.4777	38.3446	15.8611	2.15749	23.2278	-3.43714	0.000165103	0.00411783	Chr3D	Q942A8.1 RecName: Full=Germin-like protein 1-3; AltName: Full=Germin-like protein 8; Short=OsGER8; Flags: Precursor && PF00190:Cupin	-
TraesCS3D03G1083300	TraesCS3D02G489800	10.4987	5.53811	4.13577	27.3137	105.952	126.888	6.72418	86.7181	-3.68782	4.86e-10	9.74e-08	Chr3D	Q942A8.1 RecName: Full=Germin-like protein 1-3; AltName: Full=Germin-like protein 8; Short=OsGER8; Flags: Precursor && PF00190:Cupin	-
TraesCS3D03G1089400	TraesCS3D02G492400	0	2.21524	0	23.6718	25.2267	11.4552	0.738415	20.1179	-4.81336	0.000127317	0.00337584	Chr3D	Q5SMM6.1 RecName: Full=Hydroxycinnamoyltransferase 4; Short=OsHCT4; AltName: Full=BAHD-like hydroxycinnamoyl transferase HCT4; AltName: Full=Glycerol hydroxycinnamoyl transferase && PF02458:Transferase family	-
TraesCS3D03G1136100	TraesCS3D02G514100	13.6483	9.9686	20.6789	51.896	81.7344	51.989	14.7652	61.8732	-2.0602	5.9e-06	0.000292855	Chr3D	Q8S7E1.1 RecName: Full=Chlorophyllide a oxygenase, chloroplastic; Short=Chlorophyll a oxygenase; AltName: Full=Chlorophyll b synthase; Flags: Precursor && PF08417:Pheophorbide a oxygenase|PF00355:Rieske [2Fe-2S] dom	-
TraesCS3D03G1151500	TraesCS3D02G520200	150.131	93.0403	149.922	97.4188	34.3083	49.3455	131.031	60.3575	1.11609	0.00204915	0.0266998	Chr3D	-	-
TraesCS3D03G1159500	TraesCS3D02G523900	0	0	0	11.8359	5.04534	8.8117	0	8.56432	-5.4548	0.000800121	0.0135068	Chr3D	-	-
TraesCS4A03G0005700	TraesCS4A02G003700	18.8976	9.9686	7.2376	37.3287	49.4443	46.702	12.0346	44.4917	-1.88508	0.000220804	0.00512547	Chr4A	-	-
TraesCS4A03G0017900	TraesCS4A02G010700	171.128	108.547	142.684	292.256	343.083	246.728	140.786	294.022	-1.06027	3.08e-06	0.000172191	Chr4A	Q9C595.1 RecName: Full=YlmG homolog protein 2, chloroplastic; Short=AtYLMG2; AltName: Full=YGGT family protein YLMG2; Flags: Precursor && -	-
TraesCS4A03G0021300	TraesCS4A02G012800	149.081	77.5336	146.82	276.779	247.221	246.728	124.478	256.909	-1.04349	3.05e-05	0.001088	Chr4A	Q5RD67.2 RecName: Full=Solute carrier family 25 member 44 [Pongo abelii] && PF00153:Mitochondrial carrier protein	Mito_carr
TraesCS4A03G0022100	TraesCS4A02G013300	36.7453	16.6143	38.2559	91.956	61.5531	61.6819	30.5385	71.7303	-1.22883	0.00216277	0.0277499	Chr4A	-	-
TraesCS4A03G0022300	TraesCS4A02G013400	72.4408	47.6278	58.9347	121.091	140.26	123.364	59.6678	128.238	-1.10156	7.98e-05	0.00231911	Chr4A	B7J2N7.1 RecName: Full=tRNA-specific 2-thiouridylase MnmA && PF03054:tRNA methyl transferase	-
TraesCS4A03G0028000	TraesCS4A02G016700	11.5485	16.6143	21.7128	57.3587	56.5078	54.6325	16.6252	56.1663	-1.75531	4.85e-05	0.00156779	Chr4A	PF03703:Bacterial PH domain	-
TraesCS4A03G0029500	TraesCS4A02G017300	35.6955	33.2287	26.8825	61.911	91.8251	66.9689	31.9355	73.5683	-1.20251	0.000850296	0.0141415	Chr4A	Q8H2J9.3 RecName: Full=Glycerol-3-phosphate dehydrogenase [NAD(+)], chloroplastic; Flags: Precursor && PF07479:NAD-dependent glycerol-3-phosphate dehydrogenase C-terminus|PF01210:NAD-dependent glycerol-3-phosphate d	NAD_Gly3P_dh_C
TraesCS4A03G0036700	TraesCS4A02G020600	155.38	181.65	130.277	410.616	392.527	278.45	155.769	360.531	-1.21111	2.76e-08	3.34e-06	Chr4A	PF04788:Protein of unknown function (DUF620)	-
TraesCS4A03G0039900	TraesCS4A02G022100	93.4381	33.2287	61.0026	162.061	189.705	129.532	62.5565	160.433	-1.35535	4.04e-05	0.00136399	Chr4A	O49668.1 RecName: Full=Protein PAM68, chloroplastic; AltName: Full=PHOTOSYNTHESIS AFFECTED MUTANT 68; Flags: Precursor && PF11947:Photosynthesis affected mutant 68	-
TraesCS4A03G0055400	TraesCS4A02G029400	241.469	279.121	254.35	124.732	97.8795	162.135	258.313	128.249	1.00695	9.99e-06	0.000446302	Chr4A	Q8GYD9.1 RecName: Full=Probable RNA helicase SDE3; AltName: Full=Silencing defective protein 3 && PF13086:AAA domain|PF13087:AAA domain	-
TraesCS4A03G0058600	TraesCS4A02G031100	25.1968	36.5515	16.5431	66.4633	63.5712	52.8702	26.0971	60.9682	-1.22762	0.00250654	0.0309315	Chr4A	Q9STQ2.2 RecName: Full=Subtilisin-like protease SBT3.18; AltName: Full=Subtilase subfamily 3 member 18; Short=AtSBT3.18; Flags: Precursor && PF17766:Fibronectin type-III domain|PF00082:Subtilase family|PF05922:Pepti	Peptidase_S8
TraesCS4A03G0059700	TraesCS4A02G031700	89.2386	17.722	34.1201	132.016	228.049	96.9287	47.0269	152.331	-1.69214	0.000145389	0.00373022	Chr4A	Q94AQ8.1 RecName: Full=Photosynthetic NDH subunit of subcomplex B 2, chloroplastic; Short=Protein PnsB2; AltName: Full=NAD(P)H DEHYDROGENASE SUBUNIT 45; AltName: Full=NDH-DEPENDENT CYCLIC ELECTRON FLOW 2; Flags: Pre	-
TraesCS4A03G0063400	TraesCS4A02G033500	0	4.43049	0	7.28365	4.03627	37.8903	1.47683	16.4034	-3.50791	0.00465437	0.0477594	Chr4A	O82081.1 RecName: Full=Uclacyanin 1; Flags: Precursor && PF02298:Plastocyanin-like domain	Cu_bind_like
TraesCS4A03G0063800	TraesCS4A02G033600	3.1496	5.53811	0	31.866	8.07254	88.117	2.8959	42.6852	-3.90048	1e-05	0.000447741	Chr4A	O82081.1 RecName: Full=Uclacyanin 1; Flags: Precursor && PF02298:Plastocyanin-like domain	Cu_bind_like
TraesCS4A03G0069400	TraesCS4A02G036200	47.244	66.4573	52.7311	189.375	118.061	96.0475	55.4775	134.494	-1.27907	6.77e-05	0.00203773	Chr4A	Q0DV32.2 RecName: Full=4-coumarate--CoA ligase-like 1 && PF00501:AMP-binding enzyme|PF13193:AMP-binding enzyme C-terminal domain	AMP-binding
TraesCS4A03G0083700	TraesCS4A02G043000	759.053	501.753	400.136	1424.86	1163.45	802.746	553.647	1130.35	-1.02959	9.03e-06	0.000413383	Chr4A	C5WUP3.1 RecName: Full=CASP-like protein 2U2; Short=SbCASPL2U2 && PF04535:Domain of unknown function (DUF588)	-
TraesCS4A03G0094700	TraesCS4A02G049100	2.09973	12.1838	2.06789	46.4332	46.4171	30.841	5.45049	41.2304	-2.93631	8.19e-06	0.000383335	Chr4A	-	-
TraesCS4A03G0095200	TraesCS4A02G049300	1.04987	3.32287	2.06789	13.6568	18.1632	10.574	2.14687	14.1314	-2.72403	0.0047034	0.0481067	Chr4A	Q66GP0.2 RecName: Full=BTB/POZ domain-containing protein At5g67385 && PF03000:NPH3 family|PF00651:BTB/POZ domain	BTB
TraesCS4A03G0097900	TraesCS4A02G050900	14.6981	13.2915	69.2742	0	1.00907	4.40585	32.4213	1.80497	4.14382	1.53e-05	0.000631259	Chr4A	Q9FIG6.1 RecName: Full=Dirigent protein 1; Short=AtDIR1; Flags: Precursor && PF03018:Dirigent-like protein	-
TraesCS4A03G0101800	TraesCS4A02G052600	3.1496	5.53811	3.10183	22.7614	46.4171	26.4351	3.92985	31.8712	-3.02339	1.62e-05	0.000658002	Chr4A	-	-
TraesCS4A03G0122800	TraesCS4A02G061800	6.2992	7.75336	13.4413	179.36	165.487	57.2761	9.1646	134.041	-3.86549	2.97e-15	2.09e-12	Chr4A	Q7XYS3.2 RecName: Full=Allene oxide synthase 2; AltName: Full=Cytochrome P450 74A2; AltName: Full=Hydroperoxide dehydrase 2 && PF00067:Cytochrome P450	p450
TraesCS4A03G0126400	TraesCS4A02G063600	0	0	0	232.166	48.4352	81.9488	0	120.85	-9.27139	2.92e-09	4.73e-07	Chr4A	P14895.1 RecName: Full=High molecular mass early light-inducible protein HV58, chloroplastic; Short=ELIP; Flags: Precursor && PF00504:Chlorophyll A-B binding protein	-
TraesCS4A03G0129400	TraesCS4A02G065100	13.6483	9.9686	21.7128	34.5973	53.4806	58.1572	15.1099	48.745	-1.68515	0.000474211	0.00911497	Chr4A	Q9FUN0.1 RecName: Full=Homocysteine S-methyltransferase 1; AltName: Full=S-methylmethionine:homocysteine methyltransferase 1; Short=SMM:Hcy S-methyltransferase 1; AltName: Full=ZmHMT-1 && PF02574:Homocysteine S-meth	-
TraesCS4A03G0130700	TraesCS4A02G065400	309.711	182.758	256.418	619.11	744.692	590.384	249.629	651.395	-1.38229	4.83e-12	1.59e-09	Chr4A	P31165.1 RecName: Full=50S ribosomal protein L15, chloroplastic; AltName: Full=CL15; Flags: Precursor && PF00828:Ribosomal proteins 50S-L15, 50S-L18e, 60S-L27A	-
TraesCS4A03G0131200	TraesCS4A02G065600	1.04987	0	3.10183	11.8359	13.1179	14.9799	1.3839	13.3112	-3.24467	0.00320068	0.036862	Chr4A	Q9SYK0.1 RecName: Full=Beta-hexosaminidase 2; AltName: Full=Beta-GlcNAcase 2; AltName: Full=Beta-N-acetylhexosaminidase 2; AltName: Full=Beta-hexosaminidase 3; Short=AtHEX3; AltName: Full=N-acetyl-beta-glucosaminida	Glyco_hydro_20
TraesCS4A03G0135800	TraesCS4A02G068700	9.4488	16.6143	20.6789	71.0155	132.188	53.7514	15.5807	85.6516	-2.45552	8.67e-08	8.81e-06	Chr4A	PF01190:Pollen protein Ole e 1 like	-
TraesCS4A03G0143300	TraesCS4A02G071500	127.034	66.4573	83.7494	233.987	177.596	155.086	92.4135	188.89	-1.03013	0.000248848	0.0056159	Chr4A	O49607.1 RecName: Full=Subtilisin-like protease SBT1.6; AltName: Full=Subtilase subfamily 1 member 6; Short=AtSBT1.6; AltName: Full=Subtilisin-like serine protease 2; Short=At-SLP2; Flags: Precursor && PF02225:PA do	Peptidase_S8
TraesCS4A03G0164300	TraesCS4A02G080800	0	0	0	19.1196	15.136	13.2176	0	15.8244	-6.33811	9.57e-06	0.000430197	Chr4A	-	-
TraesCS4A03G0172800	TraesCS4A02G085200	1.04987	1.10762	0	10.015	34.3083	16.7422	0.719163	20.3552	-4.83592	0.000131038	0.0034505	Chr4A	B9FGV7.1 RecName: Full=Solute carrier family 40 member 3, chloroplastic; Flags: Precursor && PF06963:Ferroportin1 (FPN1)	-
TraesCS4A03G0173000	TraesCS4A02G085300	89.2386	45.4125	57.9008	199.39	150.351	66.0878	64.184	138.61	-1.10884	0.00336311	0.0382277	Chr4A	Q9LFR7.1 RecName: Full=Probable carboxylesterase 17; AltName: Full=AtCXE17 && PF07859:alpha/beta hydrolase fold	Abhydrolase_3
TraesCS4A03G0188400	TraesCS4A02G091700	10.4987	4.43049	19.6449	28.2241	74.671	33.4845	11.5247	45.4599	-1.96964	0.000845128	0.0140724	Chr4A	PF06127:Protein of unknown function (DUF962)	-
TraesCS4A03G0191300	TraesCS4A02G093100	36.7453	11.0762	18.611	111.076	122.097	53.7514	22.1442	95.6414	-2.10567	2.69e-06	0.000154359	Chr4A	P09195.1 RecName: Full=Fructose-1,6-bisphosphatase, chloroplastic; Short=FBPase; AltName: Full=D-fructose-1,6-bisphosphate 1-phosphohydrolase; Flags: Precursor && PF00316:Fructose-1-6-bisphosphatase, N-terminal doma	-
TraesCS4A03G0195900	TraesCS4A02G095200	50.3936	23.2601	24.8146	67.3737	105.952	94.2852	32.8228	89.2037	-1.43984	0.000165623	0.00412764	Chr4A	O22056.2 RecName: Full=RNA polymerase sigma factor sigB; Short=Sigma factor B; Short=Sigma-B; AltName: Full=Protein ABERRANT CHLOROPLAST 1; AltName: Full=RNA polymerase sigma factor sig1; Short=Atsig1; Short=Sigma f	Sigma70_r4
TraesCS4A03G0206400	TraesCS4A02G099800	435.695	269.152	394.966	885.873	924.306	563.068	366.604	791.082	-1.10853	3.49e-07	2.84e-05	Chr4A	P31853.2 RecName: Full=ATP synthase subunit b', chloroplastic; AltName: Full=ATP synthase F(0) sector subunit b'; AltName: Full=ATPase subunit II; Flags: Precursor && PF00430:ATP synthase B/B' CF(0)	-
TraesCS4A03G0208700	TraesCS4A02G101500	7.34906	1.10762	3.10183	22.7614	40.3627	7.93053	3.85284	23.6849	-2.60809	0.00204477	0.0266627	Chr4A	O80634.2 RecName: Full=Photosynthetic NDH subunit of lumenal location 1, chloroplastic; AltName: Full=PsbP-like protein 2; Flags: Precursor && PF01789:PsbP	-
TraesCS4A03G0209000	TraesCS4A02G101700	314.96	406.497	573.838	153.867	257.312	219.411	431.765	210.197	1.03982	1.98e-05	0.000770768	Chr4A	PF09713:Plant protein 1589 of unknown function (A_thal_3526)	-
TraesCS4A03G0211900	TraesCS4A02G103300	14.6981	19.9372	9.30548	59.1796	49.4443	44.0585	14.6469	50.8941	-1.8016	0.000106217	0.00293348	Chr4A	-	-
TraesCS4A03G0225600	TraesCS4A02G109100	108.136	84.1793	52.7311	178.449	232.085	180.64	81.6822	197.058	-1.27032	4.78e-06	0.000248859	Chr4A	Q9SR92.1 RecName: Full=Rhodanese-like domain-containing protein 10; AltName: Full=Sulfurtransferase 10; Short=AtStr10 && PF00581:Rhodanese-like domain	Rhodanese
TraesCS4A03G0229200	TraesCS4A02G110700	85.0392	43.1973	29.9843	226.703	221.995	149.799	52.7403	199.499	-1.91844	1.02e-08	1.4e-06	Chr4A	-	-
TraesCS4A03G0243900	TraesCS4A02G119000	9.4488	2.21524	5.16971	30.045	28.2539	29.9598	5.61125	29.4196	-2.38342	0.000279243	0.00611973	Chr4A	PF04667:cAMP-regulated phosphoprotein/endosulfine conserved region	-
TraesCS4A03G0248100	TraesCS4A02G120600	338.057	263.614	261.588	792.097	827.435	578.929	287.753	732.82	-1.3479	5.41e-13	2.23e-10	Chr4A	O22914.1 RecName: Full=Calvin cycle protein CP12-1, chloroplastic; AltName: Full=CP12 domain-containing protein 1; AltName: Full=Chloroplast protein 12-1; Flags: Precursor && PF02672:CP12 domain	-
TraesCS4A03G0250400	TraesCS4A02G121900	58.7925	37.6592	80.6475	150.225	132.188	103.097	59.0331	128.503	-1.11895	0.000420344	0.00828744	Chr4A	-	-
TraesCS4A03G0251200	TraesCS4A02G122200	76.6402	44.3049	118.903	220.33	238.14	170.066	79.9495	209.512	-1.38641	6.16e-06	0.000303639	Chr4A	Q8RWG2.1 RecName: Full=Protein high chlorophyll fluorescent 107; Flags: Precursor && -	-
TraesCS4A03G0261900	TraesCS4A02G125500	99.7373	83.0717	134.413	219.42	208.877	218.53	105.741	215.609	-1.02634	1.35e-05	0.000570607	Chr4A	Q9LZ98.1 RecName: Full=ABC transporter I family member 20; Short=ABC transporter ABCI.20; Short=AtABCI20; AltName: Full=GCN-related protein 3; AltName: Full=Non-intrinsic ABC protein 9 && PF00005:ABC transporter	ABC_tran
TraesCS4A03G0271100	TraesCS4A02G128200	19.9475	7.75336	32.0522	53.7169	60.544	61.6819	19.9177	58.6476	-1.5518	0.000874022	0.0144192	Chr4A	Q9SXP7.1 RecName: Full=Octanoyltransferase; AltName: Full=Lipoate biosynthesis protein; AltName: Full=Lipoate-protein ligase; AltName: Full=Lipoyl ligase; AltName: Full=Lipoyl/octanoyl transferase; AltName: Full=Oct	BPL_LipA_LipB
TraesCS4A03G0278400	TraesCS4A02G131000	3.1496	4.43049	2.06789	17.2987	28.2539	8.8117	3.21599	18.1214	-2.49571	0.00362239	0.0402824	Chr4A	D2SMN4.1 RecName: Full=NAC transcription factor NAM-B1 && PF02365:No apical meristem (NAM) protein	NAM
TraesCS4A03G0280400	TraesCS4A02G131500	37.7952	25.4753	17.577	101.061	61.5531	37.0091	26.9492	66.5409	-1.30397	0.00409032	0.0438491	Chr4A	Q9LT96.1 RecName: Full=Probable leucine-rich repeat receptor-like protein kinase At5g49770; Flags: Precursor && PF07714:Protein tyrosine and serine/threonine kinase	Pkinase_Tyr
TraesCS4A03G0288200	TraesCS4A02G134100	17.8477	9.9686	18.611	54.6273	69.6256	44.9397	15.4758	56.3976	-1.85934	3.75e-05	0.00128468	Chr4A	Q9LR64.1 RecName: Full=Photosystem II repair protein PSB27-H1, chloroplastic; Short=Psb27-H1; AltName: Full=Thylakoid lumenal protein PSB27-H1; Flags: Precursor && PF13326:Photosystem II Pbs27	-
TraesCS4A03G0313000	TraesCS4A02G140700	46.1941	24.3677	34.1201	111.986	69.6256	51.1079	34.894	77.5732	-1.15071	0.00401419	0.043326	Chr4A	B6SZW0.1 RecName: Full=Divinyl chlorophyllide a 8-vinyl-reductase, chloroplastic; Flags: Precursor && PF13460:NAD(P)H-binding	-
TraesCS4A03G0468100	TraesCS4A02G171200	15.748	12.1838	4.13577	0	0	0	10.6892	0	5.96142	0.00015756	0.00397664	Chr4A	-	-
TraesCS4A03G0484800	TraesCS4A02G177500	19.9475	31.0134	13.4413	79.2097	166.496	33.4845	21.4674	93.0634	-2.11651	3.4e-05	0.00118984	Chr4A	Q40073.1 RecName: Full=Ribulose bisphosphate carboxylase/oxygenase activase A, chloroplastic; Short=RA A; Short=RuBisCO activase A; Flags: Precursor && PF00004:ATPase family associated with various cellular activiti	AAA
TraesCS4A03G0485000	TraesCS4A02G177600	0	0	0	17.2987	47.4262	0.88117	0	21.8687	-6.80382	0.00437167	0.0458155	Chr4A	Q42450.1 RecName: Full=Ribulose bisphosphate carboxylase/oxygenase activase B, chloroplastic; Short=RA B; Short=RuBisCO activase B; Flags: Precursor && PF00004:ATPase family associated with various cellular activiti	AAA
TraesCS4A03G0497600	TraesCS4A02G183600	0	0	0	4.55228	2.01813	14.9799	0	7.18344	-5.20393	0.00323126	0.0371467	Chr4A	Q9ZUX1.1 RecName: Full=Cytochrome P450 94C1 && PF00067:Cytochrome P450	p450
TraesCS4A03G0509600	TraesCS4A02G189700	11.5485	35.4439	42.3917	50.9855	55.4987	178.878	29.7947	95.1206	-1.67695	0.00105652	0.0166456	Chr4A	P81392.1 RecName: Full=Myb-related protein 306 && PF00249:Myb-like DNA-binding domain	Myb_DNA-binding
TraesCS4A03G0511200	TraesCS4A02G190700	0	0	0	13.6568	28.2539	5.28702	0	15.7326	-6.32501	2.23e-05	0.000851239	Chr4A	P83304.1 RecName: Full=Mannose/glucose-specific lectin && PF01419:Jacalin-like lectin domain|PF03018:Dirigent-like protein	-
TraesCS4A03G0516700	TraesCS4A02G192900	38.8451	67.565	66.1723	213.047	167.505	257.302	57.5275	212.618	-1.88815	1.98e-11	5.65e-09	Chr4A	Q682S0.2 RecName: Full=Root phototropism protein 2; AltName: Full=BTB/POZ domain-containing protein RPT2 && PF03000:NPH3 family	-
TraesCS4A03G0550400	TraesCS4A02G206400	598.424	508.399	601.755	1260.07	1694.22	975.455	569.526	1309.92	-1.20088	2.14e-10	4.8e-08	Chr4A	Q40677.2 RecName: Full=Fructose-bisphosphate aldolase, chloroplastic; AltName: Full=Chloroplastic aldolase; Short=AldP; Flags: Precursor && PF00274:Fructose-bisphosphate aldolase class-I	-
TraesCS4A03G0581500	TraesCS4A02G218400	0	0	0	3.64182	13.1179	2.64351	0	6.46774	-5.04097	0.00496458	0.0497993	Chr4A	Q1EC69.1 RecName: Full=Methylsterol monooxygenase 1-2; AltName: Full=Sterol 4-alpha-methyl-oxidase 1-2; Short=AtSMO1-2 && PF04116:Fatty acid hydroxylase superfamily	-
TraesCS4A03G0603000	TraesCS4A02G226900	16.7979	16.6143	10.3394	132.016	281.53	55.5137	14.5839	156.353	-3.42223	2.63e-12	8.98e-10	Chr4A	Q9XF89.1 RecName: Full=Chlorophyll a-b binding protein CP26, chloroplastic; AltName: Full=LHCB5; AltName: Full=LHCIIc; AltName: Full=Light-harvesting complex II protein 5; Flags: Precursor && PF00504:Chlorophyll A-B	-
TraesCS4A03G0603600	TraesCS4A02G227300	22.0472	31.0134	24.8146	79.2097	81.7344	53.7514	25.9584	71.5652	-1.46333	0.000120058	0.00322982	Chr4A	PF13806:Rieske-like [2Fe-2S] domain	-
TraesCS4A03G0615700	TraesCS4A02G232300	12.5984	8.86098	7.2376	69.1946	103.934	37.8903	9.56566	70.3396	-2.87539	2.01e-08	2.51e-06	Chr4A	Q9S9N6.1 RecName: Full=Photosynthetic NDH subunit of subcomplex B 1, chloroplastic; Short=Protein PnsB1; AltName: Full=NAD(P)H DEHYDROGENASE SUBUNIT 48; AltName: Full=NDH-DEPENDENT CYCLIC ELECTRON FLOW 1; Flags: Pre	-
TraesCS4A03G0619200	TraesCS4A02G234100	12.5984	15.5067	14.4752	69.1946	97.8795	78.4241	14.1934	81.8328	-2.52718	4.27e-10	8.83e-08	Chr4A	Q9C899.1 RecName: Full=Feruloyl CoA ortho-hydroxylase 2 && PF03171:2OG-Fe(II) oxygenase superfamily|PF14226:non-haem dioxygenase in morphine synthesis N-terminal	2OG-FeII_Oxy
TraesCS4A03G0621300	TraesCS4A02G235500	37.7952	36.5515	55.8329	89.2247	129.161	83.7112	43.3932	100.699	-1.21061	0.000271352	0.0059814	Chr4A	P0A9T4.1 RecName: Full=Protein tas >P0A9T5.1 RecName: Full=Protein tas && PF00248:Aldo/keto reductase family	Aldo_ket_red
TraesCS4A03G0633700	TraesCS4A02G240000	153.28	67.565	110.632	209.405	280.521	279.331	110.492	256.419	-1.2126	9.09e-06	0.000414976	Chr4A	A2YUQ6.1 RecName: Full=Thioredoxin-like protein CITRX, chloroplastic; AltName: Full=Cf-9-interacting thioredoxin; Short=OsCiTrx; Flags: Precursor && PF00085:Thioredoxin	-
TraesCS4A03G0651600	TraesCS4A02G247400	119.685	225.955	230.569	375.108	541.869	560.424	192.07	492.467	-1.35865	2.78e-08	3.35e-06	Chr4A	-	-
TraesCS4A03G0657600	TraesCS4A02G250400	15.748	4.43049	12.4073	74.6574	14.1269	88.117	10.8619	58.9671	-2.4387	9.8e-05	0.00275573	Chr4A	-	-
TraesCS4A03G0657700	TraesCS4A02G250500	0	1.10762	0	29.1346	1.00907	22.9104	0.369207	17.6847	-5.5405	0.000303595	0.00651422	Chr4A	-	-
TraesCS4A03G0666500	TraesCS4A02G254000	0	1.10762	0	10.9255	24.2176	24.6728	0.369207	19.9386	-5.70896	4.02e-05	0.001359	Chr4A	Q9FZI8.1 RecName: Full=Lecithin-cholesterol acyltransferase-like 1 && PF02450:Lecithin:cholesterol acyltransferase	-
TraesCS4A03G0669300	TraesCS4A02G255600	45.1443	49.843	52.7311	108.344	121.088	145.393	49.2394	124.942	-1.34389	2.69e-06	0.000154383	Chr4A	PF11255:Protein of unknown function (DUF3054)	-
TraesCS4A03G0695200	TraesCS4A02G267400	44.0944	38.7668	39.2898	10.9255	21.1904	9.69287	40.717	13.9363	1.55743	0.00169969	0.0235303	Chr4A	Q2RBJ4.1 RecName: Full=DNA (cytosine-5)-methyltransferase DRM1A; AltName: Full=Protein DOMAINS REARRANGED METHYLASE 1A; Short=OsDRM1A && PF00145:C-5 cytosine-specific DNA methylase	DNA_methylase
TraesCS4A03G0697800	TraesCS4A02G268900	109.186	63.1345	108.564	217.599	263.367	176.234	93.6282	219.067	-1.22317	4.23e-06	0.00022532	Chr4A	-	-
TraesCS4A03G0699300	TraesCS4A02G269800	58.7925	28.7982	44.4595	101.061	81.7344	83.7112	44.0167	88.8354	-1.0111	0.00299096	0.0351195	Chr4A	Q9CPU4.1 RecName: Full=Microsomal glutathione S-transferase 3; Short=Microsomal GST-3; AltName: Full=Microsomal GST-III && PF01124:MAPEG family	-
TraesCS4A03G0709000	TraesCS4A02G274600	11.5485	7.75336	13.4413	47.3437	33.2992	51.989	10.9144	44.2107	-2.01634	6.93e-05	0.00207826	Chr4A	PF08576:Eukaryotic protein of unknown function (DUF1764)	-
TraesCS4A03G0710500	TraesCS4A02G275200	33.5957	35.4439	33.0862	84.6724	91.8251	80.1865	34.0419	85.5613	-1.32934	4.6e-05	0.00151	Chr4A	-	-
TraesCS4A03G0713900	TraesCS4A02G277300	19.9475	15.5067	13.4413	40.0601	58.5259	40.5338	16.2985	46.3733	-1.50622	0.00105307	0.0166106	Chr4A	Q945M9.1 RecName: Full=Nuclear transcription factor Y subunit A-9; Short=AtNF-YA-9 && PF02045:CCAAT-binding transcription factor (CBF-B/NF-YA) subunit B	CBFB_NFYA
TraesCS4A03G0714900	TraesCS4A02G278000	45.1443	18.8296	25.8486	97.4188	94.8523	64.3254	29.9408	85.5322	-1.51079	0.000102489	0.00285312	Chr4A	-	-
TraesCS4A03G0722500	TraesCS4A02G280500	90.2885	79.7488	225.4	460.691	866.789	642.373	131.812	656.617	-2.31587	1.64e-05	0.000664922	Chr4A	PF04398:Protein of unknown function, DUF538	-
TraesCS4A03G0724100	TraesCS4A02G281300	23.0971	21.0448	5.16971	82.8515	69.6256	53.7514	16.4372	68.7428	-2.06808	1.33e-05	0.000565142	Chr4A	Q9FLD7.1 RecName: Full=Beta-glucuronosyltransferase GlcAT14A; AltName: Full=GT14 family glucuronic acid transferase 1; Short=AtGlcAT14A && PF02485:Core-2/I-Branching enzyme	-
TraesCS4A03G0725300	TraesCS4A02G281800	3.1496	6.64573	6.20366	50.9855	39.3536	60.8007	5.333	50.38	-3.24472	1.64e-08	2.11e-06	Chr4A	Q9SX65.1 RecName: Full=1,4-dihydroxy-2-naphthoyl-CoA thioesterase 1; Short=AtDHNAT1; Short=DHNA-CoA thioesterase 1 && -	-
TraesCS4A03G0743600	TraesCS4A02G292300	28.3464	27.6906	12.4073	92.8665	54.4896	61.6819	22.8148	69.6793	-1.61466	0.000148754	0.0037942	Chr4A	A3DH97.1 RecName: Full=Anti-sigma-I factor RsgI6; AltName: Full=Endo-1,4-beta-xylanase && PF00331:Glycosyl hydrolase family 10|PF02018:Carbohydrate binding domain	-
TraesCS4A03G0752300	TraesCS4A02G297900	157.48	69.7802	62.0366	281.331	343.083	210.6	96.4322	278.338	-1.5278	1.12e-06	7.44e-05	Chr4A	P83585.1 RecName: Full=Ferredoxin && PF00111:2Fe-2S iron-sulfur cluster binding domain	Fer2
TraesCS4A03G0762500	TraesCS4A02G303400	83.9893	68.6726	67.2063	139.3	243.185	147.155	73.2894	176.547	-1.266	8.4e-06	0.000390149	Chr4A	PF00248:Aldo/keto reductase family	Aldo_ket_red
TraesCS4A03G0778600	TraesCS4A02G310600	26.2467	14.3991	19.6449	60.0901	84.7617	46.702	20.0969	63.8512	-1.66258	0.000104514	0.00289897	Chr4A	P82538.1 RecName: Full=PsbP-like protein 1, chloroplastic; AltName: Full=OEC23-like protein 4; AltName: Full=PsbP-related thylakoid lumenal protein 2; Flags: Precursor && PF01789:PsbP	-
TraesCS4A03G0782000	TraesCS4A02G313200	50.3936	44.3049	57.9008	187.554	125.124	74.8995	50.8664	129.193	-1.34334	0.000110181	0.0030155	Chr4A	O64489.1 RecName: Full=Probable indole-3-pyruvate monooxygenase YUCCA9; AltName: Full=Flavin-containing monooxygenase YUCCA9 && PF00743:Flavin-binding monooxygenase-like	FMO-like
TraesCS4A03G0783700	TraesCS4A02G313900	0	2.21524	0	15.4777	10.0907	7.93053	0.738415	11.1663	-3.96089	0.00429601	0.0452995	Chr4A	C0LGP4.1 RecName: Full=Probable LRR receptor-like serine/threonine-protein kinase At3g47570; Flags: Precursor && PF08263:Leucine rich repeat N-terminal domain|PF00069:Protein kinase domain|PF13855:Leucine rich repea	Pkinase
TraesCS4A03G0789000	TraesCS4A02G315700	26.2467	14.3991	19.6449	43.7019	58.5259	51.1079	20.0969	51.1119	-1.34306	0.00187917	0.0251862	Chr4A	Q9LD95.1 RecName: Full=RNA polymerase sigma factor sigF, chloroplastic; Short=Sigma factor F; Short=Sigma-F; AltName: Full=Protein SINGLET OXYGEN-LINKED DEATH ACTIVATOR 8; AltName: Full=RNA polymerase sigma factor s	Sigma70_r2
TraesCS4A03G0793700	TraesCS4A02G317900	0	0	0	12.7464	7.06347	7.93053	0	9.24679	-5.56414	0.000474907	0.00912219	Chr4A	Q84M85.1 RecName: Full=Probable cytokinin riboside 5'-monophosphate phosphoribohydrolase LOGL5; AltName: Full=Protein LONELY GUY-like 5 && PF03641:Possible lysine decarboxylase	-
TraesCS4A03G0796000	TraesCS4A02G319000	50.3936	46.5201	55.8329	177.539	181.632	118.958	50.9155	159.376	-1.64406	7.28e-09	1.05e-06	Chr4A	Q8H112.1 RecName: Full=PGR5-like protein 1A, chloroplastic; AltName: Full=Ferredoxin-plastoquinone reductase 1; Flags: Precursor && -	-
TraesCS4A03G0796400	TraesCS4A02G319100	158.53	112.977	126.141	248.554	277.494	279.331	132.549	268.46	-1.01724	1.42e-06	9.08e-05	Chr4A	O04707.1 RecName: Full=Gibberellin 20 oxidase 1-A; AltName: Full=GA 20-oxidase 1-A; AltName: Full=Gibberellin C-20 oxidase 1-B; AltName: Full=TaGA20ox1-A; Short=Ta20ox1A && PF03171:2OG-Fe(II) oxygenase superfamily|P	2OG-FeII_Oxy
TraesCS4A03G0827800	TraesCS4A02G333500	0	0	0	27.3137	3.0272	1.76234	0	10.7011	-5.77554	0.000723421	0.0125212	Chr4A	P53860.1 RecName: Full=Phosphatidylinositol transfer protein PDR16; Short=PITP; AltName: Full=Pleiotropic drug resistance protein 16; AltName: Full=SEC14 homolog 3 && PF00650:CRAL/TRIO domain	-
TraesCS4A03G0828000	TraesCS4A02G333600	26.2467	28.7982	25.8486	134.747	106.961	97.8099	26.9645	113.173	-2.07036	3.06e-10	6.65e-08	Chr4A	-	-
TraesCS4A03G0829200	TraesCS4A02G334400	51.4435	46.5201	59.9687	127.464	120.079	96.0475	52.6441	114.53	-1.11944	0.000118263	0.00318911	Chr4A	PF10063:Uncharacterized integral membrane protein (DUF2301)	-
TraesCS4A03G0833300	TraesCS4A02G339500	78.74	68.6726	51.6971	171.166	173.56	163.898	66.3699	169.541	-1.35357	1.34e-07	1.27e-05	Chr4A	Q1JP75.1 RecName: Full=L-xylulose reductase; Short=XR; AltName: Full=Dicarbonyl/L-xylulose reductase && PF13561:Enoyl-(Acyl carrier protein) reductase	-
TraesCS4A03G0860500	TraesCS4A02G347000	3.1496	7.75336	3.10183	38.2391	9.08161	18.5046	4.66826	21.9418	-2.24398	0.00495468	0.0497489	Chr4A	PF13855:Leucine rich repeat	-
TraesCS4A03G0873600	TraesCS4A02G353000	1.04987	3.32287	0	22.7614	32.2902	9.69287	1.45758	21.5815	-3.91174	0.000142165	0.00367181	Chr4A	Q9MAA2.1 RecName: Full=Phosphoglycerate mutase-like protein AT74; Short=At-74 && PF00300:Histidine phosphatase superfamily (branch 1)	-
TraesCS4A03G0878700	TraesCS4A02G355600	58.7925	27.6906	47.5614	121.091	195.759	106.622	44.6815	141.157	-1.65491	1.42e-06	9.09e-05	Chr4A	Q0JG75.2 RecName: Full=Photosystem II reaction center PSB28 protein, chloroplastic; AltName: Full=Photosystem II protein W-like; Flags: Precursor && PF03912:Psb28 protein	-
TraesCS4A03G0974600	TraesCS4A02G390300	144.882	98.5784	131.311	205.763	279.512	273.163	124.924	252.812	-1.01538	1.06e-05	0.000467814	Chr4A	Q5VSB7.1 RecName: Full=Superoxide dismutase [Fe] 2, chloroplastic; AltName: Full=Iron-superoxide dismutase; Flags: Precursor && PF02777:Iron/manganese superoxide dismutases, C-terminal domain|PF00081:Iron/manganese	-
TraesCS4A03G0979200	TraesCS4A02G392800	1.04987	2.21524	0	43.7019	72.6528	6.16819	1.08837	40.841	-5.25178	1.63e-06	0.000101718	Chr4A	Q8LIL0.2 RecName: Full=Bisdemethoxycurcumin synthase; AltName: Full=Curcuminoid synthase && PF00195:Chalcone and stilbene synthases, N-terminal domain|PF02797:Chalcone and stilbene synthases, C-terminal domain	Chal_sti_synt_N
TraesCS4A03G1005700	TraesCS4A02G404500	1.04987	0	1.03394	10.9255	4.03627	25.5539	0.694603	13.5052	-4.26543	0.00199475	0.0262164	Chr4A	Q9FKQ1.1 RecName: Full=Protein DETOXIFICATION 27; Short=AtDTX27; AltName: Full=Multidrug and toxic compound extrusion protein 27; Short=MATE protein 27 && PF01554:MatE	MatE
TraesCS4A03G1008000	TraesCS4A02G406100	30.4461	18.8296	17.577	66.4633	55.4987	65.2066	22.2842	62.3895	-1.48533	0.000223971	0.00517174	Chr4A	Q9FH04.1 RecName: Full=Alcohol dehydrogenase-like 7 && PF00107:Zinc-binding dehydrogenase|PF08240:Alcohol dehydrogenase GroES-like domain	ADH_N
TraesCS4A03G1008500	TraesCS4A02G406300	68.2413	45.4125	35.1541	113.807	126.133	78.4241	49.6026	106.122	-1.09564	0.0011624	0.0178272	Chr4A	Q0WUA3.2 RecName: Full=2-carboxy-1,4-naphthoquinone phytyltransferase, chloroplastic; AltName: Full=1,4-dihydroxy-2-naphthoate phytyltransferase; AltName: Full=1,4-dihydroxy-2-naphthoate polyprenyltransferase; AltNa	UbiA
TraesCS4A03G1009100	TraesCS4A02G406400	1.04987	0	1.03394	14.5673	9.08161	10.574	0.694603	11.4076	-4.01741	0.00301518	0.035285	Chr4A	PF14580:Leucine-rich repeat	-
TraesCS4A03G1012200	TraesCS4A02G407900	23.0971	14.3991	5.16971	39.1496	71.6438	100.453	14.222	70.4156	-2.30991	7.44e-06	0.000354566	Chr4A	O64495.1 RecName: Full=Subtilisin-like protease SBT1.2; AltName: Full=Cucumisin-like serine protease SDD1; AltName: Full=Protein STOMATAL DENSITY AND DISTRIBUTION 1; AltName: Full=Subtilase subfamily 1 member 2; Sho	Peptidase_S8
TraesCS4A03G1034900	TraesCS4A02G419100	0	0	0	17.2987	13.1179	7.93053	0	12.7824	-6.02935	5.61e-05	0.00175824	Chr4A	Q9SX38.2 RecName: Full=Putative disease resistance protein At1g50180 && -	-
TraesCS4A03G1042000	TraesCS4A02G420600	194.225	168.359	220.23	439.75	574.159	375.378	194.271	463.096	-1.25143	1.11e-09	2.03e-07	Chr4A	Q9SW18.1 RecName: Full=Magnesium protoporphyrin IX methyltransferase, chloroplastic; Flags: Precursor && PF07109:Magnesium-protoporphyrin IX methyltransferase C-terminus	-
TraesCS4A03G1074600	TraesCS4A02G430100	2.09973	1.10762	6.20366	8.1941	16.1451	36.128	3.137	20.1557	-2.67506	0.00288012	0.0341573	Chr4A	PF03018:Dirigent-like protein	-
TraesCS4A03G1083200	TraesCS4A02G435600	88.1888	71.9955	76.5118	201.211	300.702	227.342	78.8987	243.085	-1.62149	2.79e-11	7.79e-09	Chr4A	PF13386:Cytochrome C biogenesis protein transmembrane region	-
TraesCS4A03G1102400	TraesCS4A02G442400	36.7453	56.4887	57.9008	205.763	92.8342	177.115	50.3783	158.571	-1.65659	6.85e-07	4.97e-05	Chr4A	Q9XGP7.1 RecName: Full=Tricin synthase 1; AltName: Full=Caffeoyl-CoA 3-O-methyltransferase ROMT15 && PF01596:O-methyltransferase	-
TraesCS4A03G1102500	TraesCS4A02G442500	1.04987	0	0	45.5228	10.0907	20.2669	0.349955	25.2935	-6.05545	1.27e-05	0.000541291	Chr4A	Q39224.1 RecName: Full=Protein SRG1; Short=AtSRG1; AltName: Full=Protein SENESCENCE-RELATED GENE 1 && PF14226:non-haem dioxygenase in morphine synthesis N-terminal|PF03171:2OG-Fe(II) oxygenase superfamily	2OG-FeII_Oxy
TraesCS4A03G1108300	TraesCS4A02G393500	2088.18	1452.09	2278.81	713.797	692.22	733.134	1939.7	713.05	1.44385	6.87e-18	6.95e-15	Chr4A	O04066.1 RecName: Full=Acyl-CoA-binding protein; Short=ACBP [Ricinus communis] && PF00887:Acyl CoA binding protein	-
TraesCS4A03G1113200	TraesCS4A02G445900	128.084	214.879	254.35	72.8365	70.6347	91.6417	199.104	78.371	1.34366	2.12e-06	0.000126327	Chr4A	D9J0Z7.1 RecName: Full=Anthranilate O-methyltransferase 1; AltName: Full=Anthranilic acid methyltransferase 1; AltName: Full=O-methyltransferase 1 && PF03492:SAM dependent carboxyl methyltransferase	-
TraesCS4A03G1138500	TraesCS4A02G454800	1.04987	0	7.2376	16.3882	34.3083	42.2962	2.76249	30.9976	-3.46741	3.76e-05	0.00128767	Chr4A	Q06398.2 RecName: Full=Probable glutathione S-transferase GSTU6; AltName: Full=28 kDa cold-induced protein && PF13410:Glutathione S-transferase, C-terminal domain|PF02798:Glutathione S-transferase, N-terminal domain	GST_N
TraesCS4A03G1189100	TraesCS4A02G472500	38.8451	38.7668	26.8825	111.076	150.351	66.9689	34.8315	109.465	-1.65084	6.45e-06	0.000314627	Chr4A	P41344.1 RecName: Full=Ferredoxin--NADP reductase, leaf isozyme, chloroplastic; Short=FNR; Flags: Precursor && PF00175:Oxidoreductase NAD-binding domain	NAD_binding_1
TraesCS4A03G1236300	TraesCS4A02G491800	0	0	0	12.7464	3.0272	6.16819	0	7.31392	-5.22762	0.00234667	0.0294431	Chr4A	P01544.2 RecName: Full=Alpha-1-purothionin; AltName: Full=Purothionin A-II; Contains: RecName: Full=Alpha-1-purothionin; Contains: RecName: Full=Acidic protein; Flags: Precursor && PF00321:Plant thionin	-
TraesCS4A03G1254000	TraesCS4A02G499500	0	0	2.06789	33.6869	61.5531	11.4552	0.689295	35.5651	-5.65237	3.78e-06	0.000204824	Chr4A	P08248.1 RecName: Full=Plastocyanin, chloroplastic; Flags: Precursor && PF00127:Copper binding proteins, plastocyanin/azurin family	-
TraesCS4B03G0013700	TraesCS4B02G009300	0	0	0	116.538	72.6528	106.622	0	98.6043	-8.97904	3.15e-13	1.47e-10	Chr4B	P83304.1 RecName: Full=Mannose/glucose-specific lectin && PF01419:Jacalin-like lectin domain	-
TraesCS4B03G0020900	TraesCS4B02G010200	15.748	28.7982	2.06789	72.8365	92.8342	22.0293	15.538	62.5666	-2.01383	0.00149926	0.0214683	Chr4B	Q94CH6.1 RecName: Full=GDSL esterase/lipase EXL3; AltName: Full=Family II extracellular lipase 3; Short=Family II lipase EXL3; Flags: Precursor && PF00657:GDSL-like Lipase/Acylhydrolase	Lipase_GDSL
TraesCS4B03G0031400	TraesCS4B02G015200	6.2992	8.86098	20.6789	26.4032	23.2085	86.3547	11.9463	45.3221	-1.92345	0.00216168	0.027741	Chr4B	Q9FKP1.1 RecName: Full=Cation/calcium exchanger 1; Short=AtCCX1; AltName: Full=Protein CATION EXCHANGER 7 && PF01699:Sodium/calcium exchanger protein	Na_Ca_ex
TraesCS4B03G0032700	TraesCS4B02G015800	60.8922	32.1211	64.1045	180.27	228.049	177.115	52.3726	195.145	-1.89324	4.42e-11	1.19e-08	Chr4B	P83585.1 RecName: Full=Ferredoxin && PF00111:2Fe-2S iron-sulfur cluster binding domain	Fer2
TraesCS4B03G0045300	TraesCS4B02G021800	11.5485	12.1838	11.3734	39.1496	37.3355	24.6728	11.7019	33.7193	-1.52577	0.00386793	0.042198	Chr4B	A3DH97.1 RecName: Full=Anti-sigma-I factor RsgI6; AltName: Full=Endo-1,4-beta-xylanase && PF02018:Carbohydrate binding domain|PF00331:Glycosyl hydrolase family 10	-
TraesCS4B03G0049500	TraesCS4B02G023200	3.1496	0	1.03394	13.6568	10.0907	17.6234	1.39451	13.7903	-3.2934	0.00273138	0.0328232	Chr4B	PF05678:VQ motif	-
TraesCS4B03G0075700	TraesCS4B02G034700	20.9973	32.1211	10.3394	49.1646	57.5168	50.2267	21.1526	52.3027	-1.31051	0.00406482	0.0436764	Chr4B	-	-
TraesCS4B03G0084300	TraesCS4B02G038700	30.4461	29.9058	45.4935	79.2097	73.6619	62.5631	35.2818	71.8115	-1.02294	0.0039314	0.0426769	Chr4B	-	-
TraesCS4B03G0095100	TraesCS4B02G043700	98.6874	59.8116	43.4256	217.599	296.666	170.947	67.3082	228.404	-1.76142	1.01e-08	1.39e-06	Chr4B	Q9LDY5.1 RecName: Full=Peptidyl-prolyl cis-trans isomerase FKBP17-2, chloroplastic; Short=PPIase FKBP17-2; AltName: Full=FK506-binding protein 17-2; Short=AtFKBP17-2; AltName: Full=Immunophilin FKBP17-2; AltName: Fu	FKBP_C
TraesCS4B03G0096300	TraesCS4B02G044200	54.593	36.5515	43.4256	132.016	107.97	135.7	44.8567	125.229	-1.48077	5.85e-07	4.4e-05	Chr4B	PF00641:Zn-finger in Ran binding protein and others	zf-RanBP
TraesCS4B03G0097700	TraesCS4B02G045300	191.076	104.117	123.039	274.958	350.146	269.638	139.41	298.247	-1.09541	7.01e-06	0.000337892	Chr4B	-	-
TraesCS4B03G0110800	TraesCS4B02G051500	39.8949	59.8116	19.6449	94.6874	81.7344	123.364	39.7838	99.9286	-1.33392	0.000462845	0.00893837	Chr4B	Q9LSE2.1 RecName: Full=Transcription factor ICE1; AltName: Full=Basic helix-loop-helix protein 116; Short=AtbHLH116; Short=bHLH 116; AltName: Full=Inducer of CBF expression 1; AltName: Full=Transcription factor EN 4	HLH
TraesCS4B03G0128200	TraesCS4B02G059100	9.4488	14.3991	13.4413	142.942	57.5168	66.0878	12.4297	88.8487	-2.84028	1.54e-09	2.69e-07	Chr4B	P30111.1 RecName: Full=Glutathione S-transferase 2; AltName: Full=GST class-phi && PF00043:Glutathione S-transferase, C-terminal domain|PF02798:Glutathione S-transferase, N-terminal domain	GST_C
TraesCS4B03G0129200	TraesCS4B02G059400	20.9973	34.3363	27.9165	52.8064	72.6528	80.1865	27.75	68.5486	-1.30656	0.000654484	0.0116222	Chr4B	PF11255:Protein of unknown function (DUF3054)	-
TraesCS4B03G0131800	TraesCS4B02G060500	5.24933	11.0762	3.10183	38.2391	56.5078	22.0293	6.47579	38.9254	-2.59452	4.56e-05	0.00149994	Chr4B	Q9FZI8.1 RecName: Full=Lecithin-cholesterol acyltransferase-like 1 && PF02450:Lecithin:cholesterol acyltransferase	-
TraesCS4B03G0133600	TraesCS4B02G061300	74.5405	146.206	138.548	51.896	51.4624	53.7514	119.765	52.3699	1.19251	0.000188237	0.0045302	Chr4B	Q9CAU3.1 RecName: Full=Serine carboxypeptidase-like 2; Flags: Precursor && PF00450:Serine carboxypeptidase	Peptidase_S10
TraesCS4B03G0136900	TraesCS4B02G063100	38.8451	23.2601	38.2559	90.1351	97.8795	60.8007	33.4537	82.9385	-1.30547	0.000344027	0.0071202	Chr4B	Q9SW80.3 RecName: Full=BEL1-like homeodomain protein 2; Short=BEL1-like protein 2; AltName: Full=Protein SAWTOOTH 1 && PF05920:Homeobox KN domain|PF07526:Associated with HOX	POX
TraesCS4B03G0140200	TraesCS4B02G064300	3.1496	2.21524	0	37.3287	10.0907	45.8208	1.78828	31.0801	-4.13192	8.89e-06	0.000408058	Chr4B	-	-
TraesCS4B03G0147800	TraesCS4B02G067500	144.882	241.462	151.99	414.257	521.688	495.218	179.444	477.054	-1.41204	6.53e-11	1.64e-08	Chr4B	-	-
TraesCS4B03G0155100	TraesCS4B02G070300	6.2992	15.5067	10.3394	73.7469	44.399	19.3857	10.7151	45.8439	-2.10046	0.00036146	0.00737893	Chr4B	O22611.1 RecName: Full=Dormancy-associated protein 1; Short=PsDRM1 && PF05564:Dormancy/auxin associated protein	-
TraesCS4B03G0158700	TraesCS4B02G071600	0	0	0	38.2391	15.136	31.7221	0	28.3658	-7.18271	9.73e-08	9.72e-06	Chr4B	PF05132:RNA polymerase III RPC4	-
TraesCS4B03G0167200	TraesCS4B02G074900	98.6874	53.1659	63.0705	146.583	227.04	213.243	71.6413	195.622	-1.44728	4.86e-07	3.79e-05	Chr4B	A2YUQ6.1 RecName: Full=Thioredoxin-like protein CITRX, chloroplastic; AltName: Full=Cf-9-interacting thioredoxin; Short=OsCiTrx; Flags: Precursor && PF00085:Thioredoxin	-
TraesCS4B03G0188800	TraesCS4B02G083600	11.5485	11.0762	19.6449	63.7319	76.6891	51.989	14.0899	64.1367	-2.18113	8.3e-07	5.81e-05	Chr4B	Q9S9N6.1 RecName: Full=Photosynthetic NDH subunit of subcomplex B 1, chloroplastic; Short=Protein PnsB1; AltName: Full=NAD(P)H DEHYDROGENASE SUBUNIT 48; AltName: Full=NDH-DEPENDENT CYCLIC ELECTRON FLOW 1; Flags: Pre	-
TraesCS4B03G0193500	TraesCS4B02G085400	15.748	22.1524	18.611	68.2842	35.3174	42.2962	18.8371	48.6326	-1.37158	0.00279158	0.0333512	Chr4B	Q944L7.1 RecName: Full=Shewanella-like protein phosphatase 2; Short=AtSLP2 && PF00149:Calcineurin-like phosphoesterase	Metallophos
TraesCS4B03G0194600	TraesCS4B02G086100	0	0	0	6.37319	1.00907	13.2176	0	6.8666	-5.13909	0.00447779	0.0465086	Chr4B	Q9SLN8.1 RecName: Full=2-alkenal reductase (NADP(+)-dependent); AltName: Full=Alkenal double bound reductase; AltName: Full=Allylic alcohol dehydrogenase 1; Short=allyl-ADH1; AltName: Full=Flavin-free double bond re	ADH_zinc_N
TraesCS4B03G0203200	TraesCS4B02G089500	12.5984	13.2915	10.3394	162.972	322.902	100.453	12.0764	195.442	-4.01626	4.08e-20	5.47e-17	Chr4B	Q9XF89.1 RecName: Full=Chlorophyll a-b binding protein CP26, chloroplastic; AltName: Full=LHCB5; AltName: Full=LHCIIc; AltName: Full=Light-harvesting complex II protein 5; Flags: Precursor && PF00504:Chlorophyll A-B	-
TraesCS4B03G0204800	TraesCS4B02G090100	144.882	125.161	138.548	268.584	307.766	311.934	136.197	296.095	-1.11964	1.27e-08	1.68e-06	Chr4B	Q5N167.1 RecName: Full=GTPase Der; AltName: Full=GTP-binding protein EngA >Q31KP9.1 RecName: Full=GTPase Der; AltName: Full=GTP-binding protein EngA && PF14714:KH-domain-like of EngA bacterial GTPase enzymes, C-term	-
TraesCS4B03G0221100	TraesCS4B02G096500	16.7979	15.5067	12.4073	67.3737	33.2992	29.0786	14.904	43.2505	-1.53865	0.00266629	0.032241	Chr4B	P81393.1 RecName: Full=Myb-related protein 308 && PF00249:Myb-like DNA-binding domain	Myb_DNA-binding
TraesCS4B03G0250700	TraesCS4B02G109900	760.103	544.95	615.196	1402.1	1801.19	1134.07	640.083	1445.78	-1.17486	2.23e-10	4.98e-08	Chr4B	Q40677.2 RecName: Full=Fructose-bisphosphate aldolase, chloroplastic; AltName: Full=Chloroplastic aldolase; Short=AldP; Flags: Precursor && PF00274:Fructose-bisphosphate aldolase class-I	-
TraesCS4B03G0262700	TraesCS4B02G115000	32.5459	18.8296	28.9504	72.8365	78.7072	45.8208	26.7753	65.7882	-1.2924	0.00130656	0.0194436	Chr4B	-	-
TraesCS4B03G0282800	TraesCS4B02G122300	1.04987	0	9.30548	120.18	27.2448	83.7112	3.45178	77.0454	-4.4726	0.00089203	0.0146501	Chr4B	Q682S0.2 RecName: Full=Root phototropism protein 2; AltName: Full=BTB/POZ domain-containing protein RPT2 && PF03000:NPH3 family	-
TraesCS4B03G0305100	TraesCS4B02G129700	31.496	29.9058	21.7128	69.1946	114.025	52.8702	27.7049	78.6965	-1.50402	0.000169708	0.00418775	Chr4B	PF00498:FHA domain	FHA
TraesCS4B03G0327300	TraesCS4B02G140200	2.09973	1.10762	0	67.3737	158.424	5.28702	1.06912	77.0281	-6.17379	0.000117605	0.00317752	Chr4B	Q42450.1 RecName: Full=Ribulose bisphosphate carboxylase/oxygenase activase B, chloroplastic; Short=RA B; Short=RuBisCO activase B; Flags: Precursor && PF00004:ATPase family associated with various cellular activiti	AAA
TraesCS4B03G0327500	TraesCS4B02G140300	201.574	182.758	233.671	599.99	706.347	272.282	206.001	526.206	-1.35177	7.1e-07	5.11e-05	Chr4B	Q40073.1 RecName: Full=Ribulose bisphosphate carboxylase/oxygenase activase A, chloroplastic; Short=RA A; Short=RuBisCO activase A; Flags: Precursor && PF00004:ATPase family associated with various cellular activiti	AAA
TraesCS4B03G0360600	TraesCS4B02G148400	30.4461	34.3363	25.8486	71.0155	71.6438	82.83	30.2103	75.1631	-1.31724	0.000166649	0.00414454	Chr4B	-	-
TraesCS4B03G0409300	TraesCS4B02G156400	175.328	156.175	144.752	270.405	398.582	287.261	158.751	318.749	-1.00437	2.83e-06	0.000160686	Chr4B	Q9ZUU4.1 RecName: Full=RNA-binding protein CP29B, chloroplastic; AltName: Full=Ribonucleoprotein At2g37220; Flags: Precursor && PF00076:RNA recognition motif. (a.k.a. RRM, RBD, or RNP domain)	RRM_1
TraesCS4B03G0474000	TraesCS4B02G167700	5.24933	5.53811	8.27154	26.4032	16.1451	30.841	6.353	24.4631	-1.94586	0.00334268	0.0380545	Chr4B	Q9LPW3.1 RecName: Full=Transcription factor SCREAM2; AltName: Full=Basic helix-loop-helix protein 33; Short=AtbHLH33; Short=bHLH 33; AltName: Full=Transcription factor EN 44; AltName: Full=bHLH transcription factor	-
TraesCS4B03G0479000	TraesCS4B02G169800	25.1968	27.6906	43.4256	69.1946	121.088	74.0183	32.1043	88.1003	-1.4521	0.000114834	0.00312566	Chr4B	PF13041:PPR repeat family|PF12854:PPR repeat	-
TraesCS4B03G0481800	TraesCS4B02G170800	31.496	12.1838	28.9504	109.255	144.297	69.6124	24.2101	107.721	-2.14706	1.09e-07	1.07e-05	Chr4B	Q9LR64.1 RecName: Full=Photosystem II repair protein PSB27-H1, chloroplastic; Short=Psb27-H1; AltName: Full=Thylakoid lumenal protein PSB27-H1; Flags: Precursor && PF13326:Photosystem II Pbs27	-
TraesCS4B03G0482100	TraesCS4B02G171000	0	0	0	7.28365	9.08161	7.93053	0	8.09859	-5.37098	0.00100004	0.0159546	Chr4B	Q9LXG3.1 RecName: Full=Peroxidase 56; Short=Atperox P56; AltName: Full=ATP33; Flags: Precursor && PF00141:Peroxidase	-
TraesCS4B03G0486500	TraesCS4B02G173100	25.1968	24.3677	13.4413	69.1946	72.6528	55.5137	21.0019	65.7871	-1.64871	5.01e-05	0.00160638	Chr4B	Q9LT96.1 RecName: Full=Probable leucine-rich repeat receptor-like protein kinase At5g49770; Flags: Precursor && PF07714:Protein tyrosine and serine/threonine kinase	Pkinase_Tyr
TraesCS4B03G0491700	TraesCS4B02G174300	0	0	0	9.10456	6.0544	5.28702	0	6.81533	-5.12311	0.00275062	0.0330145	Chr4B	P98204.1 RecName: Full=Phospholipid-transporting ATPase 1; Short=AtALA1; AltName: Full=Aminophospholipid flippase 1 && PF13246:Cation transport ATPase (P-type)|PF16212:Phospholipid-translocating P-type ATPase C-term	-
TraesCS4B03G0504300	TraesCS4B02G179300	174.278	192.726	132.345	398.78	334.001	272.282	166.45	335.021	-1.00992	3.95e-06	0.000212523	Chr4B	C7G304.1 RecName: Full=Galactinol synthase 2; Short=GolS-2; Short=SlGolS2 && PF01501:Glycosyl transferase family 8	Glyco_transf_8
TraesCS4B03G0512800	TraesCS4B02G182100	71.3909	36.5515	50.6632	147.494	140.26	94.2852	52.8685	127.346	-1.26539	8.36e-05	0.0024104	Chr4B	Q8RWG2.1 RecName: Full=Protein high chlorophyll fluorescent 107; Flags: Precursor && -	-
TraesCS4B03G0521100	TraesCS4B02G184400	731.757	371.054	538.684	1288.29	1483.33	1050.35	547.165	1273.99	-1.21857	9.47e-09	1.32e-06	Chr4B	O22914.1 RecName: Full=Calvin cycle protein CP12-1, chloroplastic; AltName: Full=CP12 domain-containing protein 1; AltName: Full=Chloroplast protein 12-1; Flags: Precursor && PF02672:CP12 domain	-
TraesCS4B03G0528200	TraesCS4B02G187800	2.09973	8.86098	1.03394	52.8064	1.00907	54.6325	3.99822	36.1493	-3.19194	0.000867874	0.0143449	Chr4B	Q05736.1 RecName: Full=Pathogenesis-related protein 1; Short=AOPR1 && PF00407:Pathogenesis-related protein Bet v 1 family	-
TraesCS4B03G0535700	TraesCS4B02G190800	52.4933	44.3049	34.1201	81.0306	110.997	85.4735	43.6394	92.5005	-1.08276	0.00086901	0.0143603	Chr4B	-	-
TraesCS4B03G0542300	TraesCS4B02G193400	79.7898	60.9192	88.9191	219.42	305.747	161.254	76.5427	228.807	-1.5766	1.53e-08	1.98e-06	Chr4B	-	-
TraesCS4B03G0555700	TraesCS4B02G198600	191.076	171.681	158.193	377.839	504.534	316.34	173.65	399.571	-1.20107	1.55e-08	2e-06	Chr4B	O80362.1 RecName: Full=50S ribosomal protein L10, chloroplastic; AltName: Full=CL10; Flags: Precursor && PF00466:Ribosomal protein L10	-
TraesCS4B03G0560000	TraesCS4B02G200800	7.34906	6.64573	6.20366	44.6123	27.2448	17.6234	6.73282	29.8269	-2.14718	0.00079909	0.0134992	Chr4B	-	-
TraesCS4B03G0566000	TraesCS4B02G202900	203.674	283.551	187.144	91.0456	108.979	81.0677	224.79	93.6975	1.26378	2.9e-07	2.44e-05	Chr4B	-	-
TraesCS4B03G0568800	TraesCS4B02G204500	251.968	161.713	196.449	478.9	580.214	318.984	203.377	459.366	-1.17391	7.06e-07	5.1e-05	Chr4B	P31853.2 RecName: Full=ATP synthase subunit b', chloroplastic; AltName: Full=ATP synthase F(0) sector subunit b'; AltName: Full=ATPase subunit II; Flags: Precursor && PF00430:ATP synthase B/B' CF(0)	-
TraesCS4B03G0571100	TraesCS4B02G205700	17.8477	23.2601	15.5091	48.2542	63.5712	30.841	18.8723	47.5554	-1.33251	0.0041224	0.0441025	Chr4B	P09189.1 RecName: Full=Heat shock cognate 70 kDa protein && PF00012:Hsp70 protein	HSP70
TraesCS4B03G0578600	TraesCS4B02G209000	67.1914	81.9641	73.4099	156.598	172.551	126.007	74.1885	151.719	-1.03157	6.6e-05	0.00199479	Chr4B	-	-
TraesCS4B03G0583700	TraesCS4B02G211400	2.09973	11.0762	5.16971	38.2391	59.535	8.8117	6.11522	35.5286	-2.54294	0.000714179	0.0124136	Chr4B	P09195.1 RecName: Full=Fructose-1,6-bisphosphatase, chloroplastic; Short=FBPase; AltName: Full=D-fructose-1,6-bisphosphate 1-phosphohydrolase; Flags: Precursor && PF00316:Fructose-1-6-bisphosphatase, N-terminal doma	-
TraesCS4B03G0584100	TraesCS4B02G211700	77.6901	49.843	73.4099	294.077	234.104	103.097	66.981	210.426	-1.64942	1.31e-06	8.49e-05	Chr4B	P31673.2 RecName: Full=17.4 kDa class I heat shock protein; AltName: Full=17.4 kDa heat shock protein; Short=OsHsp17.4 && PF00011:Hsp20/alpha crystallin family	-
TraesCS4B03G0587700	TraesCS4B02G213000	14.6981	12.1838	29.9843	71.926	122.097	67.8501	18.9554	87.2911	-2.19614	3.47e-07	2.83e-05	Chr4B	-	-
TraesCS4B03G0601100	TraesCS4B02G218900	49.3437	53.1659	63.0705	164.792	125.124	88.117	55.1934	126.011	-1.18999	0.000131767	0.00346614	Chr4B	Q9LFR7.1 RecName: Full=Probable carboxylesterase 17; AltName: Full=AtCXE17 && PF07859:alpha/beta hydrolase fold	Abhydrolase_3
TraesCS4B03G0601700	TraesCS4B02G219000	6.2992	0	11.3734	20.03	57.5168	31.7221	5.89086	36.423	-2.61295	0.000325626	0.0068355	Chr4B	B9FGV7.1 RecName: Full=Solute carrier family 40 member 3, chloroplastic; Flags: Precursor && PF06963:Ferroportin1 (FPN1)	-
TraesCS4B03G0610800	TraesCS4B02G223100	33.5957	32.1211	41.3577	98.3292	119.07	54.6325	35.6915	90.6772	-1.3416	0.000290401	0.00630091	Chr4B	K4BVL1.1 RecName: Full=Protein SPA, chloroplastic; AltName: Full=Sugar partition-affecting protein; Flags: Precursor && PF17302:Family of unknown function (DUF5351)	-
TraesCS4B03G0617100	TraesCS4B02G224800	4.19947	0	3.10183	88.3142	8.07254	50.2267	2.43376	48.8711	-4.31432	7.66e-07	5.43e-05	Chr4B	P14895.1 RecName: Full=High molecular mass early light-inducible protein HV58, chloroplastic; Short=ELIP; Flags: Precursor && PF00504:Chlorophyll A-B binding protein	-
TraesCS4B03G0618800	TraesCS4B02G225800	6.2992	8.86098	13.4413	74.6574	105.952	45.8208	9.53381	75.4768	-2.97995	1.71e-09	2.94e-07	Chr4B	PF01190:Pollen protein Ole e 1 like	-
TraesCS4B03G0622300	TraesCS4B02G227400	62.992	25.4753	44.4595	129.285	119.07	127.77	44.3089	125.375	-1.4978	4.84e-06	0.000251023	Chr4B	O49607.1 RecName: Full=Subtilisin-like protease SBT1.6; AltName: Full=Subtilase subfamily 1 member 6; Short=AtSBT1.6; AltName: Full=Subtilisin-like serine protease 2; Short=At-SLP2; Flags: Precursor && PF02225:PA do	Peptidase_S8
TraesCS4B03G0647100	TraesCS4B02G237300	204.724	155.067	183.008	430.646	424.817	379.784	180.933	411.749	-1.18519	1.35e-10	3.17e-08	Chr4B	Q42831.1 RecName: Full=Non-symbiotic hemoglobin; AltName: Full=HORvu GLB1; AltName: Full=Non-legume hemoglobin && PF00042:Globin	-
TraesCS4B03G0647300	TraesCS4B02G237500	155.38	146.206	128.209	419.72	290.611	181.521	143.265	297.284	-1.05304	0.000101627	0.00283591	Chr4B	Q7XYS3.2 RecName: Full=Allene oxide synthase 2; AltName: Full=Cytochrome P450 74A2; AltName: Full=Hydroperoxide dehydrase 2 && PF00067:Cytochrome P450	p450
TraesCS4B03G0655900	TraesCS4B02G240900	239.37	130.699	249.18	673.737	824.408	306.647	206.416	601.597	-1.54269	0.00181427	0.0246192	Chr4B	P14654.1 RecName: Full=Glutamine synthetase cytosolic isozyme 1-2; AltName: Full=Glutamate--ammonia ligase GLN1;2; Short=OsGLN1;2; AltName: Full=Glutamine synthetase root isozyme; AltName: Full=OsGS1;2 && PF00120:Gl	-
TraesCS4B03G0671500	TraesCS4B02G248600	31.496	32.1211	32.0522	91.0456	69.6256	94.2852	31.8898	84.9855	-1.41583	2.88e-05	0.00104805	Chr4B	Q8L7J2.1 RecName: Full=Beta-glucosidase 6; Short=Os3bglu6; Flags: Precursor && PF00232:Glycosyl hydrolase family 1	Glyco_hydro_1
TraesCS4B03G0678100	TraesCS4B02G251100	39.8949	50.9506	118.903	174.808	155.396	120.72	69.9163	150.308	-1.10195	0.00192533	0.0255836	Chr4B	Q94CD8.1 RecName: Full=Glucan endo-1,3-beta-glucosidase 4; AltName: Full=(1->3)-beta-glucan endohydrolase 4; Short=(1->3)-beta-glucanase 4; AltName: Full=Beta-1,3-endoglucanase 4; Short=Beta-1,3-glucanase 4; Flags:	Glyco_hydro_17
TraesCS4B03G0678800	TraesCS4B02G251700	33.5957	12.1838	10.3394	53.7169	78.7072	45.8208	18.7063	59.415	-1.66355	0.000684273	0.0120075	Chr4B	-	-
TraesCS4B03G0685000	TraesCS4B02G255700	32.5459	43.1973	52.7311	93.7769	101.916	92.5229	42.8247	96.0719	-1.16467	0.000234238	0.00536263	Chr4B	-	-
TraesCS4B03G0688800	TraesCS4B02G257900	12.5984	4.43049	8.27154	27.3137	32.2902	41.415	8.43348	33.6729	-1.99303	0.000652365	0.0115875	Chr4B	Q10QA2.1 RecName: Full=Cyclin-D5-3; AltName: Full=G1/S-specific cyclin-D5-3; Short=CycD5;3 && PF00134:Cyclin, N-terminal domain	-
TraesCS4B03G0690300	TraesCS4B02G258200	162.729	83.0717	154.057	518.049	432.89	296.073	133.286	415.671	-1.63897	5.15e-10	1.02e-07	Chr4B	Q10QA5.1 RecName: Full=Strigolactone esterase D14; AltName: Full=Protein DWARF 14; AltName: Full=Protein DWARF 88; AltName: Full=Protein HIGH-TILLERING DWARF 2 && PF12697:Alpha/beta hydrolase family	-
TraesCS4B03G0701600	TraesCS4B02G263400	47.244	57.5964	126.141	13.6568	19.1723	51.989	76.9938	28.2727	1.44125	0.00414927	0.044243	Chr4B	Q9LUB6.1 RecName: Full=F-box protein SNE; AltName: Full=Protein SNEEZY; AltName: Full=Sleepy protein 2 && PF12937:F-box-like	-
TraesCS4B03G0715000	TraesCS4B02G269200	51.4435	62.0269	31.0183	130.195	108.979	106.622	48.1629	115.265	-1.26196	6.95e-05	0.00208088	Chr4B	Q0DV32.2 RecName: Full=4-coumarate--CoA ligase-like 1 && PF00501:AMP-binding enzyme|PF13193:AMP-binding enzyme C-terminal domain	AMP-binding
TraesCS4B03G0716800	TraesCS4B02G270100	82.9394	91.9327	55.8329	130.195	162.46	209.718	76.9017	167.458	-1.12485	7.03e-05	0.00209516	Chr4B	A1TFU9.1 RecName: Full=FAD-dependent urate hydroxylase; AltName: Full=Flavoprotein urate hydroxylase && PF01494:FAD binding domain	FAD_binding_3
TraesCS4B03G0720800	TraesCS4B02G270800	17.8477	6.64573	2.06789	36.4182	21.1904	64.3254	8.85378	40.6447	-2.20123	0.000916682	0.0149467	Chr4B	Q6F6Y2.1 RecName: Full=FAD-dependent urate hydroxylase; AltName: Full=Flavoprotein urate hydroxylase && PF01494:FAD binding domain	FAD_binding_3
TraesCS4B03G0722900	TraesCS4B02G271900	0	3.32287	0	10.015	2.01813	40.5338	1.10762	17.5223	-4.02238	0.0021581	0.0277206	Chr4B	O82081.1 RecName: Full=Uclacyanin 1; Flags: Precursor && PF02298:Plastocyanin-like domain	Cu_bind_like
TraesCS4B03G0727200	TraesCS4B02G274300	95.5378	47.6278	61.0026	163.882	213.922	122.483	68.0561	166.762	-1.28993	3.26e-05	0.00115117	Chr4B	Q94AQ8.1 RecName: Full=Photosynthetic NDH subunit of subcomplex B 2, chloroplastic; Short=Protein PnsB2; AltName: Full=NAD(P)H DEHYDROGENASE SUBUNIT 45; AltName: Full=NDH-DEPENDENT CYCLIC ELECTRON FLOW 2; Flags: Pre	-
TraesCS4B03G0742900	TraesCS4B02G280700	6.2992	3.32287	20.6789	38.2391	25.2267	49.3455	10.1003	37.6038	-1.89057	0.00254935	0.0312441	Chr4B	Q9SIW1.1 RecName: Full=BEL1-like homeodomain protein 7; Short=BEL1-like protein 7 && PF07526:Associated with HOX|PF05920:Homeobox KN domain	POX
TraesCS4B03G0744600	TraesCS4B02G281200	60.8922	36.5515	58.9347	156.598	238.14	135.7	52.1262	176.813	-1.75794	9.63e-09	1.34e-06	Chr4B	O49668.1 RecName: Full=Protein PAM68, chloroplastic; AltName: Full=PHOTOSYNTHESIS AFFECTED MUTANT 68; Flags: Precursor && PF11947:Photosynthesis affected mutant 68	-
TraesCS4B03G0748100	TraesCS4B02G282900	156.43	107.439	125.107	379.66	348.128	241.441	129.659	323.076	-1.31573	1.9e-08	2.39e-06	Chr4B	PF04788:Protein of unknown function (DUF620)	-
TraesCS4B03G0755700	TraesCS4B02G286300	31.496	9.9686	14.4752	56.4483	54.4896	39.6527	18.6466	50.1968	-1.42461	0.00330676	0.0377994	Chr4B	Q8SAY0.1 RecName: Full=50S ribosomal protein L18, chloroplastic; AltName: Full=CL18; Flags: Precursor && PF00861:Ribosomal L18 of archaea, bacteria, mitoch. and chloroplast	-
TraesCS4B03G0796500	TraesCS4B02G304300	45.1443	25.4753	47.5614	97.4188	87.7889	141.868	39.3936	109.025	-1.46722	2.11e-05	0.000811035	Chr4B	Q9FKQ1.1 RecName: Full=Protein DETOXIFICATION 27; Short=AtDTX27; AltName: Full=Multidrug and toxic compound extrusion protein 27; Short=MATE protein 27 && PF01554:MatE	MatE
TraesCS4B03G0798300	TraesCS4B02G305600	27.2965	35.4439	16.5431	68.2842	59.535	49.3455	26.4278	59.0549	-1.16308	0.00449558	0.0466031	Chr4B	Q9FH04.1 RecName: Full=Alcohol dehydrogenase-like 7 && PF08240:Alcohol dehydrogenase GroES-like domain|PF00107:Zinc-binding dehydrogenase	ADH_N
TraesCS4B03G0798600	TraesCS4B02G305800	85.0392	75.3183	51.6971	177.539	242.176	142.75	70.6849	187.488	-1.40648	8.25e-07	5.78e-05	Chr4B	Q0WUA3.2 RecName: Full=2-carboxy-1,4-naphthoquinone phytyltransferase, chloroplastic; AltName: Full=1,4-dihydroxy-2-naphthoate phytyltransferase; AltName: Full=1,4-dihydroxy-2-naphthoate polyprenyltransferase; AltNa	UbiA
TraesCS4B03G0799000	TraesCS4B02G305900	11.5485	12.1838	4.13577	17.2987	40.3627	44.0585	9.28938	33.9066	-1.87171	0.00234624	0.0294431	Chr4B	PF14580:Leucine-rich repeat	-
TraesCS4B03G0802200	TraesCS4B02G307400	9.4488	9.9686	14.4752	45.5228	77.6982	62.5631	11.2975	61.928	-2.45054	1.63e-07	1.5e-05	Chr4B	O64495.1 RecName: Full=Subtilisin-like protease SBT1.2; AltName: Full=Cucumisin-like serine protease SDD1; AltName: Full=Protein STOMATAL DENSITY AND DISTRIBUTION 1; AltName: Full=Subtilase subfamily 1 member 2; Sho	Peptidase_S8
TraesCS4B03G0806400	TraesCS4B02G309300	100.787	125.161	266.757	58.2692	103.934	67.8501	164.235	76.6844	1.10211	0.00190114	0.0253783	Chr4B	Q9M0G7.1 RecName: Full=MDIS1-interacting receptor like kinase 1; Short=AtMIK1; AltName: Full=Leucine-rich repeat receptor-like protein kinase PXL2; AltName: Full=Protein PHLOEM INTERCALATED WITH XYLEM-LIKE 2; Flags:	Pkinase
TraesCS4B03G0837800	TraesCS4B02G323000	119.685	103.009	158.193	387.854	609.477	352.468	126.962	449.933	-1.82299	8.03e-14	4.31e-11	Chr4B	P25857.2 RecName: Full=Glyceraldehyde-3-phosphate dehydrogenase GAPB, chloroplastic; AltName: Full=NADP-dependent glyceraldehydephosphate dehydrogenase B; Flags: Precursor && PF02800:Glyceraldehyde 3-phosphate dehyd	-
TraesCS4B03G0845900	TraesCS4B02G326700	137.532	79.7488	99.2585	233.077	354.183	256.421	105.513	281.227	-1.412	2.64e-08	3.23e-06	Chr4B	Q8LSQ2.1 RecName: Full=Probable signal recognition particle 43 kDa protein, chloroplastic; Flags: Precursor && PF00385:Chromo (CHRromatin Organisation MOdifier) domain|PF13857:Ankyrin repeats (many copies)	Chromo
TraesCS4B03G0881900	TraesCS4B02G338600	180.577	109.655	133.379	442.481	446.008	281.093	141.203	389.861	-1.46357	1.32e-09	2.36e-07	Chr4B	Q9FNL7.1 RecName: Full=Protein NRT1/ PTR FAMILY 5.2; Short=AtNPF5.2; AltName: Full=Peptide transporter PTR3-A; Short=AtPTR3 && PF00854:POT family	-
TraesCS4B03G0882500	TraesCS4B02G339200	58.7925	32.1211	67.2063	130.195	185.668	174.472	52.7066	163.445	-1.62891	9.24e-08	9.28e-06	Chr4B	-	-
TraesCS4B03G0885700	TraesCS4B02G341600	36.7453	39.8744	45.4935	284.973	131.179	159.492	40.7044	191.881	-2.23753	6.92e-12	2.17e-09	Chr4B	Q9FMY1.1 RecName: Full=Cytochrome P450 86B1 && PF00067:Cytochrome P450	p450
TraesCS4B03G0886000	TraesCS4B02G341800	110.236	87.5022	173.702	344.152	228.049	319.865	123.814	297.355	-1.26316	1.59e-06	9.94e-05	Chr4B	Q9FVS9.1 RecName: Full=Alkane hydroxylase MAH1; AltName: Full=Cytochrome P450 96A15; AltName: Full=Protein MID-CHAIN ALKANE HYDROXYLASE 1 && PF00067:Cytochrome P450	p450
TraesCS4B03G0886800	TraesCS4B02G342000	64.0418	73.1031	55.8329	308.644	171.541	241.441	64.3259	240.542	-1.90529	1.94e-12	6.91e-10	Chr4B	Q9FMY1.1 RecName: Full=Cytochrome P450 86B1 && PF00067:Cytochrome P450	p450
TraesCS4B03G0894600	TraesCS4B02G344300	11.5485	8.86098	5.16971	41.881	21.1904	41.415	8.52641	34.8288	-2.03491	0.000548082	0.0102112	Chr4B	Q9LIR6.1 RecName: Full=Beta-amylase 1, chloroplastic; AltName: Full=1,4-alpha-D-glucan maltohydrolase; AltName: Full=Beta-amylase 7; AltName: Full=Thioredoxin-regulated beta-amylase; Short=TR-BAMY; Flags: Precursor	-
TraesCS4B03G0895100	TraesCS4B02G344600	1006.82	578.179	739.269	1628.81	2265.36	1579.06	774.757	1824.41	-1.23505	5.28e-10	1.05e-07	Chr4B	Q9ZST0.2 RecName: Full=50S ribosomal protein L5, chloroplastic; Flags: Precursor && PF00281:Ribosomal protein L5|PF00673:ribosomal L5P family C-terminus	-
TraesCS4B03G0903100	TraesCS4B02G347100	31.496	9.9686	23.7807	51.896	76.6891	55.5137	21.7484	61.3663	-1.49041	0.000862308	0.0142834	Chr4B	O81037.1 RecName: Full=Transcription factor bHLH70; AltName: Full=Basic helix-loop-helix protein 70; Short=AtbHLH70; Short=bHLH 70; AltName: Full=Transcription factor EN 13; AltName: Full=bHLH transcription factor b	HLH
TraesCS4B03G0903700	TraesCS4B02G347400	346.456	233.708	257.452	677.379	922.287	772.786	279.205	790.818	-1.50108	1.92e-15	1.41e-12	Chr4B	Q94JX9.2 RecName: Full=Nascent polypeptide-associated complex subunit alpha-like protein 2; Short=NAC-alpha-like protein 2; AltName: Full=Alpha-NAC-like protein 2 && PF01849:NAC domain|PF19026:HYPK UBA domain	-
TraesCS4B03G0905200	TraesCS4B02G348200	6.2992	6.64573	1.03394	58.2692	34.3083	60.8007	4.65963	51.1261	-3.4679	2.2e-08	2.73e-06	Chr4B	PF01117:Aerolysin toxin|PF07468:Agglutinin domain	-
TraesCS4B03G0915000	TraesCS4B02G352100	91.3384	45.4125	55.8329	166.613	137.233	185.927	64.1946	163.258	-1.34603	5.28e-06	0.000267259	Chr4B	O65351.1 RecName: Full=Subtilisin-like protease SBT1.7; AltName: Full=Cucumisin-like serine protease; AltName: Full=Subtilase subfamily 1 member 7; Short=AtSBT1.7; AltName: Full=Subtilisin-like serine protease 1; Sh	Peptidase_S8
TraesCS4B03G0915900	TraesCS4B02G352200	68.2413	58.704	109.598	13.6568	32.2902	36.128	78.8477	27.3583	1.52919	0.000284131	0.00620152	Chr4B	A8QW51.1 RecName: Full=Probable O-methyltransferase 2; Short=SbOMT2 && PF08100:Dimerisation domain|PF00891:O-methyltransferase domain	-
TraesCS4B03G0916100	TraesCS4B02G352400	1485.56	1525.2	2565.21	407.884	743.683	1029.21	1858.66	726.924	1.35437	0.0025553	0.031279	Chr4B	Q53QK0.1 RecName: Full=Flavonoid O-methyltransferase-like protein Os11g0303600 && PF08100:Dimerisation domain|PF00891:O-methyltransferase domain	-
TraesCS4B03G0921000	TraesCS4B02G355100	47.244	33.2287	35.1541	82.8515	112.006	65.2066	38.5422	86.6882	-1.16605	0.000848198	0.01411	Chr4B	Q10SM7.1 RecName: Full=Peroxisomal membrane protein 11-1; AltName: Full=OsPEX11-1; AltName: Full=Peroxin-11-1 && PF05648:Peroxisomal biogenesis factor 11 (PEX11)	-
TraesCS4B03G0922900	TraesCS4B02G355600	11.5485	19.9372	42.3917	89.2247	182.641	92.5229	24.6258	121.463	-2.29753	1.26e-07	1.2e-05	Chr4B	Q9FJ82.1 RecName: Full=Dihydrodipicolinate reductase-like protein CRR1, chloroplastic; AltName: Full=4-hydroxy-tetrahydrodipicolinate reductase 3; Short=HTPA reductase 3; AltName: Full=Protein CHLORORESPIRATORY REDU	DapB_N
TraesCS4B03G0941100	TraesCS4B02G364700	5.24933	14.3991	13.4413	22.7614	33.2992	54.6325	11.0299	36.8977	-1.74582	0.002553	0.0312724	Chr4B	A2YVF1.1 RecName: Full=Protein TIFY 6a && PF06200:tify domain|PF09425:Jas motif	Zim
TraesCS4B03G0963900	TraesCS4B02G375600	176.378	115.193	142.684	372.376	335.01	251.133	144.751	319.507	-1.14084	5.85e-07	4.4e-05	Chr4B	Q9LD07.1 RecName: Full=Expansin-B7; AltName: Full=Beta-expansin-7; AltName: Full=OsEXPB7; AltName: Full=OsaEXPb1.12; Flags: Precursor && PF03330:Lytic transglycolase|PF01357:Expansin C-terminal domain	-
TraesCS4B03G0967400	TraesCS4B02G377600	31.496	34.3363	25.8486	91.956	61.5531	70.4936	30.5603	74.6676	-1.29146	0.000350666	0.00722627	Chr4B	P93844.2 RecName: Full=Phospholipase D alpha 2; Short=PLD alpha 2; AltName: Full=Choline phosphatase 2; AltName: Full=Phosphatidylcholine-hydrolyzing phospholipase D 2 && PF12357:Phospholipase D C terminal|PF00168:C	C2
TraesCS4B03G0970700	TraesCS4B02G379500	187.926	87.5022	171.634	530.796	723.501	306.647	149.021	520.315	-1.80181	1.14e-09	2.06e-07	Chr4B	PF01329:Pterin 4 alpha carbinolamine dehydratase	-
TraesCS4B03G0971500	TraesCS4B02G380200	4.19947	3.32287	14.4752	23.6718	37.3355	34.3656	7.33251	31.791	-2.10685	0.00114924	0.0176758	Chr4B	PF02517:CPBP intramembrane metalloprotease	-
TraesCS4B03G0980800	TraesCS4B02G384000	1492.91	1653.68	2905.38	3107.39	4980.76	4554.77	2017.32	4214.3	-1.06279	0.00441475	0.046101	Chr4B	Q8VWG4.1 RecName: Full=Acetylserotonin O-methyltransferase 3; Short=OsASMT3 && PF00891:O-methyltransferase domain|PF08100:Dimerisation domain	-
TraesCS4B03G0981000	TraesCS4B02G384200	38.8451	27.6906	38.2559	79.2097	80.7254	70.4936	34.9305	76.8095	-1.13419	0.000871923	0.014388	Chr4B	Q940M4.1 RecName: Full=Organic cation/carnitine transporter 7; Short=AtOCT7 && PF00083:Sugar (and other) transporter	Sugar_tr
TraesCS4B03G1000000	TraesCS4B02G393300	306.561	134.022	132.345	1053.4	966.686	488.168	190.976	836.084	-2.13003	5.78e-05	0.00179267	Chr4B	P82900.2 RecName: Full=Non-specific lipid-transfer protein 2G; Short=LTP2G; AltName: Full=7 kDa lipid transfer protein 1; AltName: Full=Lipid transfer protein 2 isoform 1; Short=LTP2-1; Flags: Precursor && -	-
TraesCS4D03G0002800	TraesCS4D02G001900	83.9893	39.8744	84.7833	156.598	195.759	115.433	69.549	155.93	-1.16084	0.0002711	0.00598075	Chr4D	PF00168:C2 domain	C2
TraesCS4D03G0004600	TraesCS4D02G003100	242.519	160.605	221.264	358.72	436.926	454.684	208.129	416.776	-1.00064	6.77e-07	4.94e-05	Chr4D	Q652N5.1 RecName: Full=Probable anion transporter 4, chloroplastic; AltName: Full=Phosphate transporter 4;4; Flags: Precursor && PF07690:Major Facilitator Superfamily	MFS_1
TraesCS4D03G0005100	TraesCS4D02G003600	83.9893	48.7354	49.6293	132.016	187.687	105.74	60.7846	141.814	-1.21941	0.000129313	0.00341323	Chr4D	P82538.1 RecName: Full=PsbP-like protein 1, chloroplastic; AltName: Full=OEC23-like protein 4; AltName: Full=PsbP-related thylakoid lumenal protein 2; Flags: Precursor && PF01789:PsbP	-
TraesCS4D03G0011000	TraesCS4D02G006200	56.6928	81.9641	84.7833	142.031	129.161	262.589	74.4801	177.927	-1.25836	5.3e-05	0.00168089	Chr4D	PF13419:Haloacid dehalogenase-like hydrolase	-
TraesCS4D03G0011400	TraesCS4D02G006500	0	0	2.06789	12.7464	8.07254	11.4552	0.689295	10.758	-3.93728	0.00482058	0.0489321	Chr4D	PF01419:Jacalin-like lectin domain	-
TraesCS4D03G0011500	TraesCS4D02G006600	5.24933	3.32287	16.5431	315.018	237.131	211.481	8.37176	254.543	-4.91043	5.26e-34	2.04e-30	Chr4D	PF01419:Jacalin-like lectin domain	-
TraesCS4D03G0013500	TraesCS4D02G008000	53.5432	43.1973	57.9008	146.583	127.142	71.3748	51.5471	115.034	-1.15565	0.000514387	0.00971582	Chr4D	Q9LZS7.1 RecName: Full=GDSL esterase/lipase At5g03610; AltName: Full=Extracellular lipase At5g03610; Flags: Precursor && PF00657:GDSL-like Lipase/Acylhydrolase	Lipase_GDSL
TraesCS4D03G0022900	TraesCS4D02G014200	131.233	81.9641	108.564	230.345	338.038	263.47	107.254	277.284	-1.36796	1.53e-08	1.98e-06	Chr4D	P83585.1 RecName: Full=Ferredoxin && PF00111:2Fe-2S iron-sulfur cluster binding domain	Fer2
TraesCS4D03G0023000	TraesCS4D02G014300	51.4435	40.982	27.9165	96.5083	108.979	95.1664	40.114	100.218	-1.32112	5.06e-05	0.00162027	Chr4D	PF00903:Glyoxalase/Bleomycin resistance protein/Dioxygenase superfamily	Glyoxalase
TraesCS4D03G0024600	TraesCS4D02G015400	112.336	74.2107	291.572	33.6869	84.7617	73.1371	159.373	63.8619	1.32192	0.00214095	0.0275529	Chr4D	Q76FS2.1 RecName: Full=Tubulin beta-8 chain; AltName: Full=Beta-8-tubulin && PF03953:Tubulin C-terminal domain|PF00091:Tubulin/FtsZ family, GTPase domain	Tubulin
TraesCS4D03G0025500	TraesCS4D02G015800	1.04987	0	2.06789	30.045	8.07254	24.6728	1.03925	20.9301	-4.31177	0.000118054	0.00318594	Chr4D	P33679.2 RecName: Full=Zeamatin; Flags: Precursor && PF00314:Thaumatin family	Thaumatin
TraesCS4D03G0033700	TraesCS4D02G021000	5.24933	0	3.10183	16.3882	13.1179	22.9104	2.78372	17.4722	-2.6388	0.00350248	0.0393042	Chr4D	PF05678:VQ motif	-
TraesCS4D03G0041900	TraesCS4D02G026300	201.574	129.592	191.279	410.616	486.37	463.495	174.149	453.494	-1.37907	7.16e-12	2.23e-09	Chr4D	O82225.1 RecName: Full=Gamma-glutamyl peptidase 5 && PF00117:Glutamine amidotransferase class-I	GATase
TraesCS4D03G0050400	TraesCS4D02G030000	152.231	101.901	138.548	599.08	621.585	701.411	130.893	640.692	-2.28972	1.17e-33	4.31e-30	Chr4D	PF04398:Protein of unknown function, DUF538	-
TraesCS4D03G0069000	TraesCS4D02G041200	80.8397	53.1659	38.2559	192.106	128.152	113.671	57.4205	144.643	-1.3332	4.53e-05	0.00149372	Chr4D	Q9LDY5.1 RecName: Full=Peptidyl-prolyl cis-trans isomerase FKBP17-2, chloroplastic; Short=PPIase FKBP17-2; AltName: Full=FK506-binding protein 17-2; Short=AtFKBP17-2; AltName: Full=Immunophilin FKBP17-2; AltName: Fu	FKBP_C
TraesCS4D03G0069800	TraesCS4D02G041800	4.19947	1.10762	1.03394	10.015	21.1904	12.3364	2.11368	14.5139	-2.77157	0.00492351	0.049537	Chr4D	Q9CPU4.1 RecName: Full=Microsomal glutathione S-transferase 3; Short=Microsomal GST-3; AltName: Full=Microsomal GST-III && PF01124:MAPEG family	-
TraesCS4D03G0081000	TraesCS4D02G045400	0	1.10762	3.10183	20.9405	36.3264	22.0293	1.40315	26.4321	-4.22252	1.08e-05	0.000474905	Chr4D	Q9XI73.1 RecName: Full=Photosynthetic NDH subunit of lumenal location 2, chloroplastic; AltName: Full=PsbQ-like protein 1; Flags: Precursor && PF05757:Oxygen evolving enhancer protein 3 (PsbQ)	-
TraesCS4D03G0084000	TraesCS4D02G047400	10.4987	3.32287	2.06789	40.9705	9.08161	35.2468	5.29647	28.433	-2.42603	0.00171287	0.0236435	Chr4D	Q4W8D0.1 RecName: Full=Glutamine synthetase cytosolic isozyme 1-3; AltName: Full=Glutamate--ammonia ligase GLN1;3; Short=OsGLN1;3; AltName: Full=OsGS1;3 && PF00120:Glutamine synthetase, catalytic domain|PF03951:Glut	-
TraesCS4D03G0102600	TraesCS4D02G055700	13.6483	40.982	24.8146	70.1051	40.3627	148.037	26.4816	86.1681	-1.70789	0.000491984	0.00937595	Chr4D	Q9LRQ8.1 RecName: Full=Phenolic glucoside malonyltransferase 2 && PF02458:Transferase family	-
TraesCS4D03G0112300	TraesCS4D02G060400	192.126	225.955	359.812	52.8064	56.5078	57.2761	259.298	55.5301	2.2239	7.46e-16	5.93e-13	Chr4D	Q8VZU3.1 RecName: Full=Serine carboxypeptidase-like 19; AltName: Full=Protein SINAPOYLGLUCOSE ACCUMULATOR 2; AltName: Full=Sinapoylglucose--choline O-sinapoyltransferase; Short=SCT; Contains: RecName: Full=Serine ca	Peptidase_S10
TraesCS4D03G0114100	TraesCS4D02G061200	1.04987	4.43049	0	16.3882	25.2267	5.28702	1.82679	15.634	-3.11667	0.00403304	0.0434823	Chr4D	PF05479:Photosystem I reaction centre subunit N (PSAN or PSI-N)	-
TraesCS4D03G0116100	TraesCS4D02G062100	65.0917	34.3363	61.0026	126.553	153.378	107.503	53.4769	129.145	-1.26794	4.56e-05	0.00150091	Chr4D	Q9SW80.3 RecName: Full=BEL1-like homeodomain protein 2; Short=BEL1-like protein 2; AltName: Full=Protein SAWTOOTH 1 && PF05920:Homeobox KN domain|PF07526:Associated with HOX	POX
TraesCS4D03G0118000	TraesCS4D02G063200	0	1.10762	0	27.3137	1.00907	14.9799	0.369207	14.4342	-5.24747	0.000839494	0.0140019	Chr4D	-	-
TraesCS4D03G0118100	TraesCS4D02G063300	3.1496	4.43049	4.13577	30.045	7.06347	38.7715	3.90529	25.2933	-2.7014	0.000763466	0.0130363	Chr4D	-	-
TraesCS4D03G0118200	TraesCS4D02G063400	0	6.64573	4.13577	33.6869	3.0272	36.128	3.59384	24.2807	-2.76789	0.00371293	0.041027	Chr4D	-	-
TraesCS4D03G0125300	TraesCS4D02G066400	137.532	271.368	165.431	350.525	487.379	495.218	191.444	444.374	-1.21617	6.16e-07	4.61e-05	Chr4D	-	-
TraesCS4D03G0127000	TraesCS4D02G067300	22.0472	25.4753	25.8486	69.1946	66.5984	55.5137	24.457	63.7689	-1.38216	0.000266962	0.00592319	Chr4D	Q9SZ52.1 RecName: Full=Pentatricopeptide repeat-containing protein At4g31850, chloroplastic; AltName: Full=Protein PROTON GRADIENT REGULATION 3; Flags: Precursor && PF13041:PPR repeat family|PF17177:Pentacotripeptid	-
TraesCS4D03G0133500	TraesCS4D02G070800	7.34906	4.43049	9.30548	0	0	0	7.02835	0	5.35901	0.00169988	0.0235303	Chr4D	Q9LR09.2 RecName: Full=Putative HVA22-like protein g; Short=AtHVA22g && PF03134:TB2/DP1, HVA22 family	TB2_DP1_HVA22
TraesCS4D03G0139700	TraesCS4D02G073500	115.485	78.6412	108.564	213.957	275.475	290.786	100.897	260.073	-1.36439	6.05e-09	8.88e-07	Chr4D	A2YUQ6.1 RecName: Full=Thioredoxin-like protein CITRX, chloroplastic; AltName: Full=Cf-9-interacting thioredoxin; Short=OsCiTrx; Flags: Precursor && PF00085:Thioredoxin	-
TraesCS4D03G0139800	TraesCS4D02G073600	155.38	74.2107	186.11	539.9	357.21	448.516	138.567	448.542	-1.69309	4.59e-10	9.29e-08	Chr4D	Q53QK0.1 RecName: Full=Flavonoid O-methyltransferase-like protein Os11g0303600 && PF00891:O-methyltransferase domain|PF08100:Dimerisation domain	-
TraesCS4D03G0155400	TraesCS4D02G081500	46.1941	32.1211	26.8825	105.613	102.925	81.0677	35.0659	96.5351	-1.46006	1.57e-05	0.000644018	Chr4D	Q9LX31.1 RecName: Full=Tetrapyrrole-binding protein, chloroplastic; AltName: Full=Genomes uncoupled 4; Flags: Precursor && PF05419:GUN4-like	-
TraesCS4D03G0155600	TraesCS4D02G081600	14.6981	6.64573	6.20366	38.2391	80.7254	16.7422	9.18251	45.2356	-2.29466	0.000299823	0.00645114	Chr4D	Q9S9N6.1 RecName: Full=Photosynthetic NDH subunit of subcomplex B 1, chloroplastic; Short=Protein PnsB1; AltName: Full=NAD(P)H DEHYDROGENASE SUBUNIT 48; AltName: Full=NDH-DEPENDENT CYCLIC ELECTRON FLOW 1; Flags: Pre	-
TraesCS4D03G0168000	TraesCS4D02G086400	27.2965	18.8296	28.9504	163.882	276.484	91.6417	25.0255	177.336	-2.82045	4.57e-13	1.99e-10	Chr4D	Q9XF89.1 RecName: Full=Chlorophyll a-b binding protein CP26, chloroplastic; AltName: Full=LHCB5; AltName: Full=LHCIIc; AltName: Full=Light-harvesting complex II protein 5; Flags: Precursor && PF00504:Chlorophyll A-B	-
TraesCS4D03G0169200	TraesCS4D02G086900	28.3464	15.5067	18.611	68.2842	77.6982	66.9689	20.8214	70.9838	-1.76636	7.24e-06	0.000347628	Chr4D	PF13806:Rieske-like [2Fe-2S] domain	-
TraesCS4D03G0171600	TraesCS4D02G088200	22.0472	27.6906	36.188	187.554	131.179	87.2358	28.6419	135.323	-2.23893	5.91e-10	1.15e-07	Chr4D	Q53JI9.1 RecName: Full=Probable sucrose-phosphate synthase 5; AltName: Full=Sucrose phosphate synthase 5F; Short=OsSPS5F; AltName: Full=UDP-glucose-fructose-phosphate glucosyltransferase && PF00534:Glycosyl transfer	Glycos_transf_1
TraesCS4D03G0183200	TraesCS4D02G093600	0	0	6.20366	11.8359	40.3627	15.8611	2.06789	22.6866	-3.43095	0.00067608	0.0119027	Chr4D	Q1EC69.1 RecName: Full=Methylsterol monooxygenase 1-2; AltName: Full=Sterol 4-alpha-methyl-oxidase 1-2; Short=AtSMO1-2 && PF04116:Fatty acid hydroxylase superfamily	-
TraesCS4D03G0203700	TraesCS4D02G102900	0	1.10762	0	8.1941	10.0907	16.7422	0.369207	11.6757	-4.93935	0.000968279	0.015577	Chr4D	-	-
TraesCS4D03G0204300	TraesCS4D02G103400	136.483	173.897	180.94	16.3882	13.1179	5.28702	163.773	11.5977	3.82851	1.87e-24	3.42e-21	Chr4D	Q7XA40.2 RecName: Full=Putative disease resistance protein RGA3; AltName: Full=Blight resistance protein B149; AltName: Full=RGA1-blb && PF18052:Rx N-terminal domain|PF00931:NB-ARC domain	NB-ARC
TraesCS4D03G0211900	TraesCS4D02G107400	445.143	310.134	329.828	1023.35	1478.28	598.315	361.702	1033.32	-1.51365	2.06e-09	3.43e-07	Chr4D	Q40677.2 RecName: Full=Fructose-bisphosphate aldolase, chloroplastic; AltName: Full=Chloroplastic aldolase; Short=AldP; Flags: Precursor && PF00274:Fructose-bisphosphate aldolase class-I	-
TraesCS4D03G0230100	TraesCS4D02G115500	195.275	182.758	224.366	366.914	473.253	381.547	200.799	407.238	-1.01862	6.36e-08	6.78e-06	Chr4D	P37107.1 RecName: Full=Signal recognition particle 54 kDa protein, chloroplastic; Short=54 chloroplast protein; Short=54CP; Short=SRP54; Short=cpSRP54; AltName: Full=FFC; Flags: Precursor && PF02881:SRP54-type prote	-
TraesCS4D03G0239400	TraesCS4D02G119700	25.1968	38.7668	37.2219	103.792	55.4987	136.581	33.7285	98.624	-1.55154	5.77e-05	0.00179167	Chr4D	Q9SHB5.1 RecName: Full=WRKY transcription factor 55; AltName: Full=WRKY DNA-binding protein 55 && PF03106:WRKY DNA -binding domain	WRKY
TraesCS4D03G0240700	TraesCS4D02G120400	27.2965	7.75336	56.8669	268.584	155.396	191.214	30.6389	205.065	-2.7406	0.000206902	0.00487114	Chr4D	Q682S0.2 RecName: Full=Root phototropism protein 2; AltName: Full=BTB/POZ domain-containing protein RPT2 && PF03000:NPH3 family	-
TraesCS4D03G0245600	TraesCS4D02G122600	2.09973	0	4.13577	74.6574	113.016	7.04936	2.0785	64.9074	-4.9541	0.000422723	0.00832259	Chr4D	P83304.1 RecName: Full=Mannose/glucose-specific lectin && PF03018:Dirigent-like protein|PF01419:Jacalin-like lectin domain	-
TraesCS4D03G0267500	TraesCS4D02G134900	3.1496	0	3.10183	25.4928	49.4443	1.76234	2.08381	25.5665	-3.59884	0.000668154	0.0117929	Chr4D	Q42450.1 RecName: Full=Ribulose bisphosphate carboxylase/oxygenase activase B, chloroplastic; Short=RA B; Short=RuBisCO activase B; Flags: Precursor && PF00004:ATPase family associated with various cellular activiti	AAA
TraesCS4D03G0298400	TraesCS4D02G145500	8.39893	3.32287	12.4073	31.866	36.3264	28.1974	8.04304	32.1299	-1.98887	0.000928596	0.0150805	Chr4D	P24631.1 RecName: Full=17.5 kDa class II heat shock protein && PF00011:Hsp20/alpha crystallin family	-
TraesCS4D03G0397700	TraesCS4D02G164500	5.24933	7.75336	1.03394	27.3137	45.408	26.4351	4.67888	33.0523	-2.82971	4.07e-05	0.00137196	Chr4D	O23049.1 RecName: Full=50S ribosomal protein L6, chloroplastic; AltName: Full=Protein EMBRYO DEFECTIVE 2394; Flags: Precursor && PF00347:Ribosomal protein L6	-
TraesCS4D03G0418800	TraesCS4D02G168800	3.1496	24.3677	11.3734	40.0601	62.5622	34.3656	12.9636	45.6626	-1.8215	0.0017655	0.0241785	Chr4D	PF06596:Photosystem II reaction centre X protein (PsbX)	-
TraesCS4D03G0429100	TraesCS4D02G172800	60.8922	29.9058	35.1541	128.374	178.605	70.4936	41.984	125.824	-1.57995	3.53e-05	0.00122862	Chr4D	Q9LR64.1 RecName: Full=Photosystem II repair protein PSB27-H1, chloroplastic; Short=Psb27-H1; AltName: Full=Thylakoid lumenal protein PSB27-H1; Flags: Precursor && PF00433:Protein kinase C terminal domain|PF13326:Ph	-
TraesCS4D03G0434100	TraesCS4D02G175200	18.8976	23.2601	20.6789	89.2247	53.4806	25.5539	20.9455	56.0864	-1.42117	0.00364811	0.0405069	Chr4D	Q9LT96.1 RecName: Full=Probable leucine-rich repeat receptor-like protein kinase At5g49770; Flags: Precursor && PF07714:Protein tyrosine and serine/threonine kinase	Pkinase_Tyr
TraesCS4D03G0435100	TraesCS4D02G175700	2.09973	6.64573	7.2376	40.0601	25.2267	8.8117	5.32769	24.6995	-2.21319	0.00398172	0.0430555	Chr4D	D2SMN4.1 RecName: Full=NAC transcription factor NAM-B1 && PF02365:No apical meristem (NAM) protein	NAM
TraesCS4D03G0456900	TraesCS4D02G183700	41.9947	26.5829	37.2219	149.315	113.016	80.1865	35.2665	114.172	-1.6923	9.76e-07	6.64e-05	Chr4D	Q8RWG2.1 RecName: Full=Protein high chlorophyll fluorescent 107; Flags: Precursor && -	-
TraesCS4D03G0458900	TraesCS4D02G184900	6.2992	14.3991	20.6789	54.6273	64.5803	43.1773	13.7924	54.1283	-1.96999	5.43e-05	0.00171122	Chr4D	Q9ZQV7.1 RecName: Full=Probable nicotianamine synthase 2; AltName: Full=HvNAS2; AltName: Full=S-adenosyl-L-methionine:S-adenosyl-L-methionine:S-adenosyl-methionine 3-amino-3-carboxypropyltransferase 2 && PF03059:Nic	-
TraesCS4D03G0460000	TraesCS4D02G185400	816.796	416.466	528.345	1362.04	1415.72	981.624	587.202	1253.13	-1.09303	5.65e-07	4.29e-05	Chr4D	O22914.1 RecName: Full=Calvin cycle protein CP12-1, chloroplastic; AltName: Full=CP12 domain-containing protein 1; AltName: Full=Chloroplast protein 12-1; Flags: Precursor && PF02672:CP12 domain	-
TraesCS4D03G0479700	TraesCS4D02G194400	163.779	84.1793	119.937	256.749	327.947	250.252	122.632	278.316	-1.18011	2.46e-06	0.000142521	Chr4D	-	-
TraesCS4D03G0483000	TraesCS4D02G195800	3.1496	7.75336	6.20366	45.5228	123.106	45.8208	5.7022	71.4833	-3.64944	6.86e-10	1.32e-07	Chr4D	Q944C1.2 RecName: Full=Phosphoinositide phospholipase C 4; AltName: Full=Phosphoinositide phospholipase PLC4; Short=AtPLC4; Short=PI-PLC4 && PF00581:Rhodanese-like domain|PF00168:C2 domain|PF00387:Phosphatidylinosit	PI-PLC-X
TraesCS4D03G0489500	TraesCS4D02G198800	56.6928	23.2601	93.0548	18.2091	11.0997	17.6234	57.6692	15.6441	1.87976	0.000310819	0.00663655	Chr4D	-	-
TraesCS4D03G0490400	TraesCS4D02G199500	259.317	142.883	199.551	437.019	589.295	355.993	200.584	460.769	-1.19803	5.82e-07	4.39e-05	Chr4D	O80362.1 RecName: Full=50S ribosomal protein L10, chloroplastic; AltName: Full=CL10; Flags: Precursor && PF00466:Ribosomal protein L10	-
TraesCS4D03G0496100	TraesCS4D02G201800	4.19947	0	9.30548	45.5228	37.3355	17.6234	4.50165	33.4939	-2.87883	0.000125637	0.00334145	Chr4D	-	-
TraesCS4D03G0499800	TraesCS4D02G204000	2.09973	0	2.06789	30.045	37.3355	11.4552	1.38921	26.2786	-4.21782	1.91e-05	0.000749009	Chr4D	O80634.2 RecName: Full=Photosynthetic NDH subunit of lumenal location 1, chloroplastic; AltName: Full=PsbP-like protein 2; Flags: Precursor && PF01789:PsbP	-
TraesCS4D03G0502400	TraesCS4D02G205400	185.826	127.377	177.838	386.033	489.398	233.51	163.68	369.647	-1.17325	6.03e-06	0.000298544	Chr4D	P31853.2 RecName: Full=ATP synthase subunit b', chloroplastic; AltName: Full=ATP synthase F(0) sector subunit b'; AltName: Full=ATPase subunit II; Flags: Precursor && PF00430:ATP synthase B/B' CF(0)	-
TraesCS4D03G0506500	TraesCS4D02G207200	1.04987	0	2.06789	14.5673	22.1995	18.5046	1.03925	18.4238	-4.12235	0.000182058	0.00442055	Chr4D	Q53FA7.2 RecName: Full=Quinone oxidoreductase PIG3; AltName: Full=Tumor protein p53-inducible protein 3; AltName: Full=p53-induced gene 3 protein && -	-
TraesCS4D03G0517700	TraesCS4D02G212000	12.5984	0	6.20366	40.9705	76.6891	26.4351	6.26735	48.0316	-2.92482	1.91e-05	0.00074787	Chr4D	P09195.1 RecName: Full=Fructose-1,6-bisphosphatase, chloroplastic; Short=FBPase; AltName: Full=D-fructose-1,6-bisphosphate 1-phosphohydrolase; Flags: Precursor && PF00316:Fructose-1-6-bisphosphatase, N-terminal doma	-
TraesCS4D03G0522100	TraesCS4D02G213800	22.0472	8.86098	5.16971	81.0306	65.5894	60.8007	12.026	69.1402	-2.52234	2.36e-07	2.03e-05	Chr4D	-	-
TraesCS4D03G0523000	TraesCS4D02G214300	720.208	526.121	598.653	1201.8	1512.59	1117.32	614.994	1277.24	-1.05367	3.44e-10	7.28e-08	Chr4D	O50061.2 RecName: Full=50S ribosomal protein L4, chloroplastic; AltName: Full=CL4; AltName: Full=R-protein L4; Flags: Precursor && PF00573:Ribosomal protein L4/L1 family	-
TraesCS4D03G0532200	TraesCS4D02G219100	38.8451	27.6906	27.9165	122.001	70.6347	61.6819	31.484	84.7726	-1.42881	0.000186198	0.00449372	Chr4D	Q9LFR7.1 RecName: Full=Probable carboxylesterase 17; AltName: Full=AtCXE17 && PF07859:alpha/beta hydrolase fold	Abhydrolase_3
TraesCS4D03G0532300	TraesCS4D02G219200	9.4488	4.43049	2.06789	16.3882	58.5259	29.0786	5.31572	34.6642	-2.70158	0.000147109	0.00376465	Chr4D	B9FGV7.1 RecName: Full=Solute carrier family 40 member 3, chloroplastic; Flags: Precursor && PF06963:Ferroportin1 (FPN1)	-
TraesCS4D03G0546700	TraesCS4D02G226100	37.7952	48.7354	58.9347	103.792	71.6438	190.333	48.4884	121.923	-1.33241	0.000316267	0.00670973	Chr4D	Q9MAM3.1 RecName: Full=3-ketoacyl-CoA synthase 1; Short=KCS-1; AltName: Full=Very long-chain fatty acid condensing enzyme 1; Short=VLCFA condensing enzyme 1 && PF08392:FAE1/Type III polyketide synthase-like protein|	-
TraesCS4D03G0547500	TraesCS4D02G226500	15.748	43.1973	32.0522	82.8515	100.907	67.8501	30.3325	83.8694	-1.46882	0.000181793	0.00441874	Chr4D	PF01190:Pollen protein Ole e 1 like	-
TraesCS4D03G0550900	TraesCS4D02G227700	18.8976	13.2915	27.9165	73.7469	64.5803	26.4351	20.0352	54.9208	-1.44979	0.00317274	0.0365946	Chr4D	A3DH97.1 RecName: Full=Anti-sigma-I factor RsgI6; AltName: Full=Endo-1,4-beta-xylanase && PF00331:Glycosyl hydrolase family 10	-
TraesCS4D03G0552400	TraesCS4D02G228200	51.4435	85.2869	46.5274	135.658	123.106	120.72	61.0859	126.495	-1.05328	0.000411849	0.00816337	Chr4D	O49607.1 RecName: Full=Subtilisin-like protease SBT1.6; AltName: Full=Subtilase subfamily 1 member 6; Short=AtSBT1.6; AltName: Full=Subtilisin-like serine protease 2; Short=At-SLP2; Flags: Precursor && PF02225:PA do	Peptidase_S8
TraesCS4D03G0554100	TraesCS4D02G229100	65.0917	54.2735	64.1045	149.315	170.532	83.7112	61.1566	134.519	-1.13444	0.000293849	0.00636349	Chr4D	Q8RXC8.1 RecName: Full=Receptor-like cytosolic serine/threonine-protein kinase RBK2; AltName: Full=Protein ROP BINDING PROTEIN KINASES 2 && PF00069:Protein kinase domain	Pkinase
TraesCS4D03G0556400	TraesCS4D02G230600	28.3464	19.9372	32.0522	65.5528	66.5984	67.8501	26.7786	66.6671	-1.31313	0.000435653	0.00850901	Chr4D	Q38909.1 RecName: Full=Probable xyloglucan endotransglucosylase/hydrolase protein 28; Short=At-XTH28; Short=XTH-28; Flags: Precursor && PF00722:Glycosyl hydrolases family 16|PF06955:Xyloglucan endo-transglycosylase	-
TraesCS4D03G0557900	TraesCS4D02G231200	77.6901	65.3497	70.3081	149.315	175.578	170.947	71.116	165.28	-1.21567	8.21e-07	5.77e-05	Chr4D	Q94DW6.1 RecName: Full=Serpin-Z1; AltName: Full=OrysaZ1 && PF00079:Serpin (serine protease inhibitor)	Serpin
TraesCS4D03G0575700	TraesCS4D02G238600	11.5485	9.9686	7.2376	67.3737	59.535	57.2761	9.58491	61.3949	-2.68088	9.99e-09	1.38e-06	Chr4D	Q42831.1 RecName: Full=Non-symbiotic hemoglobin; AltName: Full=HORvu GLB1; AltName: Full=Non-legume hemoglobin && PF00042:Globin	-
TraesCS4D03G0579800	TraesCS4D02G240400	0	0	0	24.5823	3.0272	7.04936	0	11.553	-5.88706	0.000248972	0.0056159	Chr4D	P14895.1 RecName: Full=High molecular mass early light-inducible protein HV58, chloroplastic; Short=ELIP; Flags: Precursor && PF00504:Chlorophyll A-B binding protein	-
TraesCS4D03G0580300	TraesCS4D02G240700	32.5459	26.5829	49.6293	272.226	271.439	83.7112	36.2527	209.126	-2.52487	1.58e-10	3.65e-08	Chr4D	P14654.1 RecName: Full=Glutamine synthetase cytosolic isozyme 1-2; AltName: Full=Glutamate--ammonia ligase GLN1;2; Short=OsGLN1;2; AltName: Full=Glutamine synthetase root isozyme; AltName: Full=OsGS1;2 && PF00120:Gl	-
TraesCS4D03G0583600	TraesCS4D02G242100	35.6955	19.9372	38.2559	57.3587	82.7435	103.978	31.2962	81.3601	-1.37557	0.000348903	0.00719845	Chr4D	Q9FUN0.1 RecName: Full=Homocysteine S-methyltransferase 1; AltName: Full=S-methylmethionine:homocysteine methyltransferase 1; Short=SMM:Hcy S-methyltransferase 1; AltName: Full=ZmHMT-1 && PF02574:Homocysteine S-meth	-
TraesCS4D03G0588800	TraesCS4D02G244500	0	1.10762	0	6.37319	15.136	20.2669	0.369207	13.9254	-5.19221	0.000418761	0.00826091	Chr4D	Q84WI0.1 RecName: Full=Zinc finger protein GIS; AltName: Full=Protein GLABROUS INFLORESCENCE STEMS && -	-
TraesCS4D03G0594800	TraesCS4D02G248000	17.8477	37.6592	28.9504	114.717	70.6347	103.978	28.1524	96.4434	-1.78091	1.76e-06	0.000107631	Chr4D	Q8L7J2.1 RecName: Full=Beta-glucosidase 6; Short=Os3bglu6; Flags: Precursor && PF00232:Glycosyl hydrolase family 1	Glyco_hydro_1
TraesCS4D03G0603500	TraesCS4D02G251400	0	0	0	7.28365	10.0907	7.93053	0	8.43495	-5.42917	0.000793929	0.0134423	Chr4D	-	-
TraesCS4D03G0605400	TraesCS4D02G251900	27.2965	24.3677	16.5431	61.911	107.97	71.3748	22.7358	80.4187	-1.82162	4.09e-06	0.000218874	Chr4D	-	-
TraesCS4D03G0618500	TraesCS4D02G258000	151.181	208.233	191.279	399.69	447.017	276.687	183.564	374.465	-1.02803	3.54e-06	0.000193797	Chr4D	Q10QA5.1 RecName: Full=Strigolactone esterase D14; AltName: Full=Protein DWARF 14; AltName: Full=Protein DWARF 88; AltName: Full=Protein HIGH-TILLERING DWARF 2 && PF12697:Alpha/beta hydrolase family	-
TraesCS4D03G0625800	TraesCS4D02G262500	27.2965	19.9372	33.0862	36.4182	66.5984	131.294	26.7733	78.1037	-1.54414	0.000845936	0.0140824	Chr4D	Q9LVQ7.1 RecName: Full=Protein indeterminate-domain 1; AltName: Full=Protein ENHYDROUS && -	-
TraesCS4D03G0627000	TraesCS4D02G263300	507.085	479.601	404.272	819.41	1177.58	920.823	463.653	972.605	-1.06847	5.68e-10	1.11e-07	Chr4D	Q9LK61.1 RecName: Full=30S ribosomal protein S10, chloroplastic; Flags: Precursor && PF00338:Ribosomal protein S10p/S20e	Ribosomal_S10
TraesCS4D03G0628200	TraesCS4D02G263900	48.2939	36.5515	43.4256	124.732	102.925	98.6911	42.757	108.783	-1.34612	9.17e-06	0.000417018	Chr4D	-	-
TraesCS4D03G0630100	TraesCS4D02G264800	212.073	146.206	157.159	354.167	435.917	316.34	171.813	368.808	-1.1005	2.13e-07	1.86e-05	Chr4D	O65693.2 RecName: Full=Probable ribosome-binding factor A, chloroplastic; Flags: Precursor && PF02033:Ribosome-binding factor A	-
TraesCS4D03G0630800	TraesCS4D02G265000	17.8477	16.6143	6.20366	29.1346	19.1723	107.503	13.5552	51.9365	-1.94364	0.00216107	0.0277383	Chr4D	Q9SV71.1 RecName: Full=Cytochrome b561 and DOMON domain-containing protein At4g12980; AltName: Full=Protein b561A.tha15; Flags: Precursor && PF04526:Protein of unknown function (DUF568)|PF03188:Eukaryotic cytochrome	Cytochrom_B561
TraesCS4D03G0639900	TraesCS4D02G269000	61.9421	55.3811	94.0888	101.971	132.188	210.6	70.4707	148.253	-1.07251	0.000923232	0.0150157	Chr4D	Q9FF12.1 RecName: Full=Flavin-containing monooxygenase FMO GS-OX-like 9; AltName: Full=Flavin-monooxygenase glucosinolate S-oxygenase-like 9 && PF00743:Flavin-binding monooxygenase-like	FMO-like
TraesCS4D03G0643200	TraesCS4D02G270900	3.1496	6.64573	2.06789	18.2091	3.0272	52.8702	3.95441	24.7022	-2.65571	0.00384491	0.0420456	Chr4D	O82081.1 RecName: Full=Uclacyanin 1; Flags: Precursor && PF02298:Plastocyanin-like domain	Cu_bind_like
TraesCS4D03G0646800	TraesCS4D02G273000	12.5984	3.32287	8.27154	66.4633	146.315	76.6618	8.06427	96.4799	-3.57005	1.29e-12	4.74e-10	Chr4D	Q94AQ8.1 RecName: Full=Photosynthetic NDH subunit of subcomplex B 2, chloroplastic; Short=Protein PnsB2; AltName: Full=NAD(P)H DEHYDROGENASE SUBUNIT 45; AltName: Full=NDH-DEPENDENT CYCLIC ELECTRON FLOW 2; Flags: Pre	-
TraesCS4D03G0662600	TraesCS4D02G279300	16.7979	25.4753	18.611	55.5378	60.544	75.7806	20.2947	63.9542	-1.65952	3.98e-05	0.00135091	Chr4D	Q9SIW1.1 RecName: Full=BEL1-like homeodomain protein 7; Short=BEL1-like protein 7 && PF07526:Associated with HOX|PF05920:Homeobox KN domain	POX
TraesCS4D03G0664800	TraesCS4D02G279900	72.4408	44.3049	39.2898	100.15	174.569	121.601	52.0118	132.107	-1.34256	4.42e-05	0.00146349	Chr4D	O49668.1 RecName: Full=Protein PAM68, chloroplastic; AltName: Full=PHOTOSYNTHESIS AFFECTED MUTANT 68; Flags: Precursor && PF11947:Photosynthesis affected mutant 68	-
TraesCS4D03G0667600	TraesCS4D02G281700	30.4461	53.1659	39.2898	67.3737	70.6347	109.265	40.9673	82.4245	-1.01229	0.00482781	0.048964	Chr4D	P49252.3 RecName: Full=Primary amine oxidase; AltName: Full=Amine oxidase [copper-containing]; Flags: Precursor && PF02728:Copper amine oxidase, N3 domain|PF02727:Copper amine oxidase, N2 domain|PF01179:Copper amine	-
TraesCS4D03G0673400	TraesCS4D02G283600	6.2992	6.64573	12.4073	100.15	115.034	33.4845	8.45075	82.8894	-3.28775	1.2e-09	2.17e-07	Chr4D	Q76LB1.1 RecName: Full=Aluminum-activated malate transporter 1; Short=TaALMT1 && PF11744:Aluminium activated malate transporter	-
TraesCS4D03G0675500	TraesCS4D02G285000	59.8424	42.0897	35.1541	100.15	148.333	111.909	45.6954	120.131	-1.39283	1.14e-05	0.000496345	Chr4D	Q8SAY0.1 RecName: Full=50S ribosomal protein L18, chloroplastic; AltName: Full=CL18; Flags: Precursor && PF00861:Ribosomal L18 of archaea, bacteria, mitoch. and chloroplast	-
TraesCS4D03G0678800	TraesCS4D02G286200	1.04987	3.32287	16.5431	40.9705	36.3264	15.8611	6.97194	31.0527	-2.14616	0.00451562	0.0467483	Chr4D	PF03703:Bacterial PH domain	-
TraesCS4D03G0693300	TraesCS4D02G292400	127.034	115.193	126.141	315.928	441.971	335.726	122.789	364.542	-1.56835	4.44e-14	2.52e-11	Chr4D	Q9C595.1 RecName: Full=YlmG homolog protein 2, chloroplastic; Short=AtYLMG2; AltName: Full=YGGT family protein YLMG2; Flags: Precursor && PF02325:YGGT family	-
TraesCS4D03G0700400	TraesCS4D02G295900	3.1496	7.75336	11.3734	66.4633	22.1995	67.8501	7.42544	52.1709	-2.81448	3.15e-06	0.000174903	Chr4D	Q8GRS2.1 RecName: Full=Protein TIFY 11c; Short=OsTIFY11c; AltName: Full=Jasmonate ZIM domain-containing protein 11; Short=OsJAZ11; AltName: Full=OsJAZ2 >A2XD79.1 RecName: Full=Protein TIFY 11c && PF09425:Jas motif|P	Zim
TraesCS4D03G0712400	TraesCS4D02G302200	0	0	0	7.28365	2.01813	10.574	0	6.62527	-5.0867	0.0040679	0.0436893	Chr4D	Q9FZ95.1 RecName: Full=Purine permease 3; Short=AtPUP3 && PF16913:Purine nucleobase transmembrane transport	-
TraesCS4D03G0712800	TraesCS4D02G302500	32.5459	23.2601	27.9165	80.1201	59.535	102.216	27.9075	80.6236	-1.53141	3.76e-05	0.00128767	Chr4D	Q9FKQ1.1 RecName: Full=Protein DETOXIFICATION 27; Short=AtDTX27; AltName: Full=Multidrug and toxic compound extrusion protein 27; Short=MATE protein 27 && PF01554:MatE	MatE
TraesCS4D03G0714300	TraesCS4D02G303100	124.934	217.094	170.601	69.1946	64.5803	66.0878	170.876	66.6209	1.35768	6.8e-07	4.95e-05	Chr4D	-	-
TraesCS4D03G0716600	TraesCS4D02G304100	1.04987	0	0	4.55228	17.1541	7.04936	0.349955	9.58526	-4.64803	0.00327157	0.0374988	Chr4D	PF13855:Leucine rich repeat	-
TraesCS4D03G0719300	TraesCS4D02G305500	19.9475	4.43049	6.20366	38.2391	62.5622	88.9982	10.1939	63.2665	-2.62971	2e-06	0.000119939	Chr4D	O64495.1 RecName: Full=Subtilisin-like protease SBT1.2; AltName: Full=Cucumisin-like serine protease SDD1; AltName: Full=Protein STOMATAL DENSITY AND DISTRIBUTION 1; AltName: Full=Subtilase subfamily 1 member 2; Sho	Peptidase_S8
TraesCS4D03G0726700	TraesCS4D02G309400	54.593	47.6278	33.0862	104.702	97.8795	81.0677	45.1023	94.5499	-1.06828	0.000909452	0.0148553	Chr4D	PF09366:Protein of unknown function (DUF1997)	-
TraesCS4D03G0727500	TraesCS4D02G309900	0	2.21524	0	14.5673	6.0544	14.0987	0.738415	11.5735	-4.01568	0.00379189	0.0416421	Chr4D	B9DFU2.1 RecName: Full=Cytochrome P450 711A1; AltName: Full=Protein MORE AXILLARY BRANCHES 1 && PF00067:Cytochrome P450	p450
TraesCS4D03G0738700	TraesCS4D02G315900	120.735	128.484	83.7494	212.136	285.566	209.718	110.989	235.807	-1.08719	7.34e-06	0.000350746	Chr4D	-	-
TraesCS4D03G0745200	TraesCS4D02G319400	17.8477	22.1524	10.3394	162.061	310.793	122.483	16.7799	198.445	-3.56692	4.26e-19	5.22e-16	Chr4D	P12859.2 RecName: Full=Glyceraldehyde-3-phosphate dehydrogenase B, chloroplastic; AltName: Full=NADP-dependent glyceraldehydephosphate dehydrogenase subunit B; Flags: Precursor && PF00044:Glyceraldehyde 3-phosphate	-
TraesCS4D03G0753700	TraesCS4D02G323400	95.5378	56.4887	65.1384	230.345	298.684	221.174	72.3883	250.068	-1.78609	3.68e-12	1.24e-09	Chr4D	Q8LSQ2.1 RecName: Full=Probable signal recognition particle 43 kDa protein, chloroplastic; Flags: Precursor && PF13857:Ankyrin repeats (many copies)|PF00385:Chromo (CHRromatin Organisation MOdifier) domain	Chromo
TraesCS4D03G0780600	TraesCS4D02G335500	47.244	44.3049	47.5614	108.344	182.641	138.344	46.3701	143.11	-1.62374	5.29e-08	5.89e-06	Chr4D	-	-
TraesCS4D03G0783700	TraesCS4D02G337500	103.937	134.022	117.869	345.973	204.841	326.033	118.61	292.282	-1.3032	7.06e-08	7.44e-06	Chr4D	Q9FMY1.1 RecName: Full=Cytochrome P450 86B1 && PF00067:Cytochrome P450	p450
TraesCS4D03G0792700	TraesCS4D02G341000	0	0	0	13.6568	11.0997	3.52468	0	9.42709	-5.58892	0.000549521	0.010223	Chr4D	Q94LW3.1 RecName: Full=Homeobox protein knotted-1-like 3; AltName: Full=Homeobox protein HOS66 && PF03790:KNOX1 domain|PF03791:KNOX2 domain|PF05920:Homeobox KN domain	Coprinus_mating
TraesCS4D03G0794600	TraesCS4D02G342000	5.24933	1.10762	13.4413	30.9555	83.7526	41.415	6.5994	52.041	-2.96408	4.23e-06	0.000225122	Chr4D	O81037.1 RecName: Full=Transcription factor bHLH70; AltName: Full=Basic helix-loop-helix protein 70; Short=AtbHLH70; Short=bHLH 70; AltName: Full=Transcription factor EN 13; AltName: Full=bHLH transcription factor b	HLH
TraesCS4D03G0795500	TraesCS4D02G342400	410.498	338.932	315.353	863.112	1058.51	952.545	354.928	958.056	-1.43223	5.65e-19	6.67e-16	Chr4D	Q94JX9.2 RecName: Full=Nascent polypeptide-associated complex subunit alpha-like protein 2; Short=NAC-alpha-like protein 2; AltName: Full=Alpha-NAC-like protein 2 && PF19026:HYPK UBA domain|PF01849:NAC domain	-
TraesCS4D03G0796500	TraesCS4D02G342900	4.19947	0	3.10183	27.3137	22.1995	9.69287	2.43376	19.7353	-3.00301	0.00107673	0.0168597	Chr4D	PF01117:Aerolysin toxin|PF07468:Agglutinin domain	-
TraesCS4D03G0805000	TraesCS4D02G346800	144.882	203.803	251.248	43.7019	60.544	103.097	199.977	69.1143	1.53047	1.4e-06	8.97e-05	Chr4D	Q53QK0.1 RecName: Full=Flavonoid O-methyltransferase-like protein Os11g0303600 && PF00891:O-methyltransferase domain|PF08100:Dimerisation domain	-
TraesCS4D03G0813200	TraesCS4D02G351100	31.496	25.4753	24.8146	61.911	50.4534	68.7313	27.262	60.3652	-1.1482	0.00259533	0.0316132	Chr4D	P50846.1 RecName: Full=KHG/KDPG aldolase; Includes: RecName: Full=4-hydroxy-2-oxoglutarate aldolase; AltName: Full=2-keto-4-hydroxyglutarate aldolase; Short=KHG-aldolase; Includes: RecName: Full=2-dehydro-3-deoxy-ph	-
TraesCS4D03G0823600	TraesCS4D02G356300	0	4.43049	12.4073	9.10456	56.5078	27.3163	5.6126	30.9762	-2.45688	0.00367568	0.040725	Chr4D	Q39152.1 RecName: Full=Fatty acyl-CoA reductase 1 && PF07993:Male sterility protein|PF03015:Male sterility protein	NAD_binding_4
TraesCS4D03G0829000	TraesCS4D02G361500	56.6928	71.9955	138.548	9.10456	18.1632	46.702	89.0789	24.6566	1.84853	0.000231711	0.00531526	Chr4D	Q05085.1 RecName: Full=Protein NRT1/ PTR FAMILY 6.3; Short=AtNPF6.3; AltName: Full=Nitrate transporter 1.1; Short=AtNRT1; AltName: Full=Nitrate/chlorate transporter; AltName: Full=Protein CHLORINA 1 && PF00854:POT f	-
TraesCS4D03G0829300	TraesCS4D02G361700	106.037	42.0897	68.2402	263.122	167.505	144.512	72.1221	191.713	-1.40876	1.83e-05	0.000722593	Chr4D	Q9LD07.1 RecName: Full=Expansin-B7; AltName: Full=Beta-expansin-7; AltName: Full=OsEXPB7; AltName: Full=OsaEXPb1.12; Flags: Precursor && PF03330:Lytic transglycolase|PF01357:Expansin C-terminal domain	-
TraesCS5A03G0011300	TraesCS5A02G006100	255.118	168.359	200.585	492.557	632.685	635.324	208.02	586.855	-1.4953	2.23e-14	1.34e-11	Chr5A	Q8W4I6.1 RecName: Full=GTP-binding protein BRASSINAZOLE INSENSITIVE PALE GREEN 2, chloroplastic; Short=Protein BRZ-INSENSITIVE-PALE GREEN 2; Flags: Precursor && PF01926:50S ribosome-binding GTPase	-
TraesCS5A03G0043900	TraesCS5A02G018000	30.4461	9.9686	16.5431	94.6874	98.8886	62.5631	18.9859	85.3797	-2.16364	4.01e-07	3.19e-05	Chr5A	P81370.2 RecName: Full=Thaumatin-like protein; AltName: Allergen=Act d 2; Flags: Precursor && PF00314:Thaumatin family	Thaumatin
TraesCS5A03G0066700	TraesCS5A02G027100	15.748	11.0762	7.2376	37.3287	30.272	31.7221	11.3539	33.1076	-1.54533	0.00426466	0.0450737	Chr5A	Q9LS54.1 RecName: Full=VQ motif-containing protein 20; Short=AtVQ20 && PF05678:VQ motif	-
TraesCS5A03G0072900	TraesCS5A02G029700	16.7979	11.0762	2.06789	67.3737	38.3446	112.79	9.98066	72.836	-2.87303	3.72e-07	3e-05	Chr5A	Q9LHT0.1 RecName: Full=Tropinone reductase homolog At5g06060 && PF13561:Enoyl-(Acyl carrier protein) reductase	-
TraesCS5A03G0105600	TraesCS5A02G041600	62.992	66.4573	33.0862	129.285	131.179	109.265	54.1785	123.243	-1.18737	0.000139879	0.00362401	Chr5A	Q8LG95.1 RecName: Full=Pentatricopeptide repeat-containing protein At4g21190; AltName: Full=Protein EMBRYO DEFECTIVE 1417 && -	-
TraesCS5A03G0115200	TraesCS5A02G045700	131.233	85.2869	127.175	271.316	392.527	279.331	114.565	314.391	-1.4537	1.03e-09	1.88e-07	Chr5A	Q9AR38.1 RecName: Full=Protoporphyrinogen oxidase, chloroplastic; Short=PPO; AltName: Full=Protoporphyrinogen oxidase 1; Flags: Precursor && PF01593:Flavin containing amine oxidoreductase	Amino_oxidase
TraesCS5A03G0132000	TraesCS5A02G052300	4.19947	1.10762	8.27154	20.03	18.1632	27.3163	4.52621	21.8365	-2.26045	0.00301317	0.035285	Chr5A	Q9LXA5.1 RecName: Full=L-type lectin-domain containing receptor kinase IX.1; Short=LecRK-IX.1; Flags: Precursor && PF01657:Salt stress response/antifungal	-
TraesCS5A03G0143500	TraesCS5A02G056600	11.5485	18.8296	20.6789	50.9855	51.4624	95.1664	17.019	65.8714	-1.95502	1.37e-05	0.000577202	Chr5A	Q6YV88.1 RecName: Full=Ent-cassadiene C2-hydroxylase; AltName: Full=Cytochrome P450 71Z7 && PF00067:Cytochrome P450	p450
TraesCS5A03G0143600	TraesCS5A02G056700	50.3936	38.7668	49.6293	103.792	108.979	68.7313	46.2632	93.8342	-1.0172	0.00178731	0.024391	Chr5A	Q8W4K5.1 RecName: Full=VAN3-binding protein; AltName: Full=Protein FORKED 1 && PF08458:Plant pleckstrin homology-like region|PF05703:Auxin canalisation	-
TraesCS5A03G0190000	TraesCS5A02G075000	14.6981	12.1838	19.6449	51.896	63.5712	66.9689	15.509	60.812	-1.96793	4.38e-06	0.000231538	Chr5A	Q9LS72.1 RecName: Full=Pentatricopeptide repeat-containing protein At3g29230 && PF01535:PPR repeat|PF13041:PPR repeat family	PPR
TraesCS5A03G0207600	TraesCS5A02G081900	10.4987	4.43049	9.30548	157.509	95.8614	98.6911	8.07821	117.354	-3.85334	1.21e-17	1.17e-14	Chr5A	PF06549:Protein of unknown function (DUF1118)	-
TraesCS5A03G0210500	TraesCS5A02G083300	46.1941	47.6278	53.765	104.702	145.306	106.622	49.1956	118.877	-1.27059	1.62e-05	0.000657683	Chr5A	Q10I26.1 RecName: Full=DEAD-box ATP-dependent RNA helicase 34 && -	-
TraesCS5A03G0211900	TraesCS5A02G084100	24.1469	19.9372	13.4413	106.523	105.952	96.0475	19.1751	102.841	-2.42431	1.92e-11	5.5e-09	Chr5A	Q9FIA1.1 RecName: Full=GDSL esterase/lipase At5g55050; AltName: Full=Extracellular lipase At5g55050; Flags: Precursor && PF00657:GDSL-like Lipase/Acylhydrolase	Lipase_GDSL
TraesCS5A03G0227600	TraesCS5A02G090000	0	1.10762	0	10.015	3.0272	14.0987	0.369207	9.04698	-4.57451	0.00429057	0.0452584	Chr5A	C0SV51.1 RecName: Full=Calmodulin-binding protein 60 C && PF07887:Calmodulin binding protein-like	-
TraesCS5A03G0248400	TraesCS5A02G098800	76.6402	66.4573	81.6815	22.7614	37.3355	37.8903	74.9264	32.6624	1.1998	0.000777399	0.0132321	Chr5A	Q9LVQ4.1 RecName: Full=WEB family protein At5g55860 && PF05701:Weak chloroplast movement under blue light	-
TraesCS5A03G0273200	TraesCS5A02G105100	196.325	145.099	135.447	323.212	434.908	438.823	158.957	398.981	-1.32722	4.48e-10	9.11e-08	Chr5A	Q05024.1 RecName: Full=Protein TRI1 && PF02201:SWIB/MDM2 domain	-
TraesCS5A03G0286500	TraesCS5A02G108000	5.24933	16.6143	10.3394	152.957	201.813	55.5137	10.7344	136.761	-3.67605	1.11e-13	5.76e-11	Chr5A	Q40677.2 RecName: Full=Fructose-bisphosphate aldolase, chloroplastic; AltName: Full=Chloroplastic aldolase; Short=AldP; Flags: Precursor && PF00274:Fructose-bisphosphate aldolase class-I	-
TraesCS5A03G0296100	TraesCS5A02G110300	80.8397	57.5964	57.9008	198.479	242.176	86.3547	65.4456	175.67	-1.4223	3.61e-05	0.00124764	Chr5A	Q9ZP21.1 RecName: Full=Thioredoxin M-type, chloroplastic; Short=Trx-M; Flags: Precursor && PF00085:Thioredoxin	-
TraesCS5A03G0301500	TraesCS5A02G112000	32.5459	27.6906	22.7467	81.941	58.5259	51.1079	27.6611	63.8583	-1.20761	0.00191947	0.0255204	Chr5A	-	-
TraesCS5A03G0374700	TraesCS5A02G132700	0	0	3.10183	9.10456	6.0544	30.841	1.03394	15.3333	-3.8695	0.00204767	0.0266905	Chr5A	F8WKW0.1 RecName: Full=Crocetin glucosyltransferase, chloroplastic; AltName: Full=UDP-glucose glucosyltransferase 1; Short=GjUGT1; AltName: Full=UDP-glycosyltransferase 75L6; Flags: Precursor && PF00201:UDP-glucoron	UDPGT
TraesCS5A03G0409600	TraesCS5A02G147500	35.6955	26.5829	39.2898	86.4933	90.8161	77.543	33.8561	84.9508	-1.32417	8.1e-05	0.00234739	Chr5A	Q2QYL8.1 RecName: Full=Probable serine/threonine-protein kinase WNK8; Short=OsWNK8; AltName: Full=Protein kinase with no lysine 8 && PF00069:Protein kinase domain	Pkinase
TraesCS5A03G0411500	TraesCS5A02G149000	78.74	85.2869	68.2402	200.3	339.047	300.479	77.4224	279.942	-1.85446	1.97e-13	9.81e-11	Chr5A	-	-
TraesCS5A03G0447800	TraesCS5A02G165400	937.531	753.183	1052.55	2792.37	3704.29	1465.39	914.423	2654.01	-1.5371	0.000129556	0.0034183	Chr5A	Q40004.1 RecName: Full=Ribulose bisphosphate carboxylase small chain, chloroplastic; Short=RuBisCO small subunit; Flags: Precursor && PF00101:Ribulose bisphosphate carboxylase, small chain|PF12338:Ribulose-1,5-bisph	-
TraesCS5A03G0448500	TraesCS5A02G165700	428.345	352.224	461.138	1511.36	2529.73	648.541	413.903	1563.21	-1.91698	0.000460871	0.00890924	Chr5A	Q40004.1 RecName: Full=Ribulose bisphosphate carboxylase small chain, chloroplastic; Short=RuBisCO small subunit; Flags: Precursor && PF12338:Ribulose-1,5-bisphosphate carboxylase small subunit|PF00101:Ribulose bisp	-
TraesCS5A03G0464800	TraesCS5A02G173700	24.1469	34.3363	26.8825	104.702	141.269	129.532	28.4552	125.168	-2.13875	2.89e-11	7.99e-09	Chr5A	O48529.1 RecName: Full=Rhodanese-like domain-containing protein 9, chloroplastic; AltName: Full=Sulfurtransferase 9; Short=AtStr9; Flags: Precursor && PF00581:Rhodanese-like domain	Rhodanese
TraesCS5A03G0465400	TraesCS5A02G174100	62.992	23.2601	76.5118	0	0	4.40585	54.2546	1.46862	5.15044	2.13e-09	3.54e-07	Chr5A	Q9FL59.1 RecName: Full=FT-interacting protein 1 && PF08372:Plant phosphoribosyltransferase C-terminal|PF00168:C2 domain	C2
TraesCS5A03G0501300	TraesCS5A02G193800	25.1968	15.5067	16.5431	83.7619	86.7798	68.7313	19.0822	79.7577	-2.06085	1.03e-07	1.02e-05	Chr5A	Q9M9V6.2 RecName: Full=Isochorismate synthase 2, chloroplastic; Short=AtIcs2; AltName: Full=Isochorismate mutase 2; AltName: Full=menF-like protein 2; Flags: Precursor && PF00425:chorismate binding enzyme	-
TraesCS5A03G0521200	TraesCS5A02G200600	65.0917	33.2287	52.7311	162.972	227.04	246.728	50.3505	212.246	-2.07278	8.8e-13	3.41e-10	Chr5A	Q9XIK0.1 RecName: Full=Protein PLASTID REDOX INSENSITIVE 2; Flags: Precursor && -	-
TraesCS5A03G0549100	TraesCS5A02G213000	29.3963	27.6906	19.6449	101.061	146.315	68.7313	25.5772	105.369	-2.04132	7.83e-08	8.08e-06	Chr5A	Q8LCQ4.1 RecName: Full=Photosystem I chlorophyll a/b-binding protein 6, chloroplastic; AltName: Full=LHCI type III LHCA6; Flags: Precursor && PF00504:Chlorophyll A-B binding protein	-
TraesCS5A03G0570800	TraesCS5A02G222500	6.2992	23.2601	26.8825	78.2992	43.3899	40.5338	18.8139	54.0743	-1.52457	0.00302441	0.0353753	Chr5A	Q69P51.1 RecName: Full=Cellulose synthase A catalytic subunit 9 [UDP-forming]; AltName: Full=OsCesA9 >A2Z1C8.1 RecName: Full=Cellulose synthase A catalytic subunit 9 [UDP-forming]; AltName: Full=OsCesA9 && PF14569:Z	-
TraesCS5A03G0584700	TraesCS5A02G229300	0	0	0	47.3437	75.68	54.6325	0	59.2188	-8.24046	5.98e-11	1.54e-08	Chr5A	Q36718.1 RecName: Full=Chlorophyll a-b binding protein 1B-20, chloroplastic; AltName: Full=LHCI type I CAB-1B-20; AltName: Full=Light-harvesting complex I 20 kDa protein; Flags: Precursor && PF00504:Chlorophyll A-B	-
TraesCS5A03G0586500	TraesCS5A02G230500	35.6955	22.1524	9.30548	76.4783	60.544	39.6527	22.3845	58.8917	-1.39593	0.00378257	0.0415585	Chr5A	Q9S7Y1.1 RecName: Full=Transcription factor bHLH30; AltName: Full=Basic helix-loop-helix protein 30; Short=AtbHLH30; Short=bHLH 30; AltName: Full=Transcription factor EN 53; AltName: Full=bHLH transcription factor b	HLH
TraesCS5A03G0591200	TraesCS5A02G232700	39.8949	32.1211	42.3917	70.1051	78.7072	98.6911	38.1359	82.5011	-1.11257	0.000916358	0.0149467	Chr5A	Q6YPD0.1 RecName: Full=Homeobox-leucine zipper protein HOX27; AltName: Full=HD-ZIP protein HOX27; AltName: Full=Homeodomain transcription factor HOX27; AltName: Full=OsHox27 && PF00046:Homeodomain|PF02183:Homeobox a	Homeobox
TraesCS5A03G0592900	TraesCS5A02G233400	5.24933	5.53811	0	13.6568	30.272	27.3163	3.59581	23.7484	-2.73252	0.000851687	0.0141613	Chr5A	Q6NLW5.2 RecName: Full=Protein XRI1; AltName: Full=Protein X-RAY INDUCED 1 && -	-
TraesCS5A03G0593300	TraesCS5A02G233700	121.784	128.484	93.0548	351.436	231.076	135.7	114.441	239.404	-1.06516	0.000430075	0.00843109	Chr5A	Q9C9X7.1 RecName: Full=Protein indeterminate-domain 14; Short=AtIDD14; AltName: Full=Transcriptional regulator of starch metabolism IDD14 && -	-
TraesCS5A03G0601000	TraesCS5A02G237900	12.5984	4.43049	14.4752	32.7764	33.2992	37.8903	10.5014	34.6553	-1.71618	0.00211062	0.0272866	Chr5A	Q67TP9.1 RecName: Full=Heat stress transcription factor B-1; AltName: Full=Heat stress transcription factor 23; Short=OsHsf-23 && PF00447:HSF-type DNA-binding	HSF_DNA-bind
TraesCS5A03G0608300	TraesCS5A02G241200	22.0472	5.53811	19.6449	61.911	41.3718	47.5832	15.7434	50.2886	-1.67039	0.00087472	0.0144239	Chr5A	I4DST8.1 RecName: Full=Tuliposide A-converting enzyme 1, chloroplastic; Short=TgTCEA1; Flags: Precursor && PF07859:alpha/beta hydrolase fold	Abhydrolase_3
TraesCS5A03G0613700	TraesCS5A02G245200	51.4435	50.9506	35.1541	138.389	127.142	87.2358	45.8494	117.589	-1.35913	1.77e-05	0.000704602	Chr5A	PF04784:Protein of unknown function, DUF547|PF14389:Leucine-zipper of ternary complex factor MIP1	-
TraesCS5A03G0617500	TraesCS5A02G246800	16.7979	6.64573	24.8146	40.9705	41.3718	71.3748	16.0861	51.239	-1.6672	0.00103954	0.0164556	Chr5A	Q6YXH8.2 RecName: Full=Cyclin-D4-1; AltName: Full=G1/S-specific cyclin-D4-1; Short=CycD4;1 && PF02984:Cyclin, C-terminal domain|PF00134:Cyclin, N-terminal domain	Cyclin_C
TraesCS5A03G0640300	TraesCS5A02G256900	0	0	0	29.1346	32.2902	7.04936	0	22.8247	-6.86378	1.19e-06	7.84e-05	Chr5A	Q00327.1 RecName: Full=Photosystem I reaction center subunit V, chloroplastic; AltName: Full=PSI-G; AltName: Full=Photosystem I 9 kDa protein; Flags: Precursor && PF01241:Photosystem I psaG / psaK	-
TraesCS5A03G0642300	TraesCS5A02G257700	68.2413	46.5201	56.8669	141.121	142.278	81.0677	57.2094	121.489	-1.08377	0.000611279	0.0110287	Chr5A	P09886.1 RecName: Full=Small heat shock protein, chloroplastic; Flags: Precursor && PF00011:Hsp20/alpha crystallin family	-
TraesCS5A03G0644800	TraesCS5A02G259000	0	0	0	7.28365	10.0907	8.8117	0	8.72867	-5.47892	0.00064225	0.011448	Chr5A	Q39010.2 RecName: Full=Shaggy-related protein kinase zeta; AltName: Full=ASK-zeta && -	-
TraesCS5A03G0648600	TraesCS5A02G261000	73.4906	54.2735	45.4935	91.956	167.505	157.729	57.7525	139.064	-1.26694	6.17e-05	0.00189201	Chr5A	Q8L633.1 RecName: Full=Ribonuclease Z, chloroplastic; Short=RNase Z; AltName: Full=Zinc phosphodiesterase CPZ; AltName: Full=tRNA 3 endonuclease; AltName: Full=tRNase Z; Flags: Precursor && PF12706:Beta-lactamase su	-
TraesCS5A03G0661400	TraesCS5A02G268200	220.472	204.91	485.953	27.3137	69.6256	85.4735	303.778	60.8043	2.32101	0.000129315	0.00341323	Chr5A	Q9S9N9.1 RecName: Full=Cinnamoyl-CoA reductase 1; Short=AtCCR1; AltName: Full=Protein IRREGULAR XYLEM 4 && PF01370:NAD dependent epimerase/dehydratase family	Epimerase
TraesCS5A03G0661700	TraesCS5A02G268500	64.0418	84.1793	177.838	22.7614	60.544	52.8702	108.686	45.3919	1.26269	0.00282134	0.0336031	Chr5A	Q9S9N9.1 RecName: Full=Cinnamoyl-CoA reductase 1; Short=AtCCR1; AltName: Full=Protein IRREGULAR XYLEM 4 && PF01370:NAD dependent epimerase/dehydratase family	Epimerase
TraesCS5A03G0663800	TraesCS5A02G269100	12.5984	28.7982	18.611	73.7469	96.8705	50.2267	20.0025	73.6147	-1.8816	1.31e-05	0.000556857	Chr5A	Q6K9A2.1 RecName: Full=Cinnamoyl-CoA reductase 1; Short=OsCCR1 && PF01370:NAD dependent epimerase/dehydratase family	Epimerase
TraesCS5A03G0669300	TraesCS5A02G271400	157.48	112.977	115.802	252.196	324.92	241.441	128.753	272.852	-1.08186	1.61e-06	0.000100385	Chr5A	Q41822.1 RecName: Full=Protein Iojap, chloroplastic; Flags: Precursor && PF02410:Ribosomal silencing factor during starvation	DUF143
TraesCS5A03G0689900	TraesCS5A02G280800	20.9973	23.2601	12.4073	90.1351	63.5712	38.7715	18.8882	64.1593	-1.76635	0.0001052	0.00291285	Chr5A	Q9SV68.1 RecName: Full=Putative quinone-oxidoreductase homolog, chloroplastic && PF08240:Alcohol dehydrogenase GroES-like domain|PF13602:Zinc-binding dehydrogenase	ADH_N
TraesCS5A03G0693100	TraesCS5A02G282600	6.2992	6.64573	4.13577	25.4928	17.1541	28.1974	5.69357	23.6148	-2.05779	0.00235963	0.0295447	Chr5A	PF12928:tRNA-splicing endonuclease subunit sen54 N-term	-
TraesCS5A03G0703200	TraesCS5A02G287100	5.24933	5.53811	1.03394	16.3882	18.1632	22.9104	3.94046	19.1539	-2.28961	0.00396444	0.0429294	Chr5A	Q9FJ45.1 RecName: Full=GDSL esterase/lipase At5g45910; AltName: Full=Extracellular lipase At5g45910; Flags: Precursor && PF00657:GDSL-like Lipase/Acylhydrolase	Lipase_GDSL
TraesCS5A03G0742600	TraesCS5A02G305100	30.4461	9.9686	41.3577	156.598	163.469	196.501	27.2575	172.189	-2.65248	1.52e-13	7.68e-11	Chr5A	Q6X1C0.1 RecName: Full=Crocetin glucosyltransferase 2 && PF00201:UDP-glucoronosyl and UDP-glucosyl transferase	UDPGT
TraesCS5A03G0769800	TraesCS5A02G317400	24.1469	24.3677	27.9165	71.926	64.5803	61.6819	25.477	66.0627	-1.37398	0.000206868	0.00487114	Chr5A	Q69NF5.1 RecName: Full=Endoglucanase 23; AltName: Full=Endo-1,4-beta glucanase 23; AltName: Full=OsGLU12; Flags: Precursor && PF00759:Glycosyl hydrolase family 9	-
TraesCS5A03G0783800	TraesCS5A02G322500	2.09973	7.75336	15.5091	143.852	275.475	69.6124	8.45408	162.98	-4.2667	1.02e-06	6.94e-05	Chr5A	Q10HD0.1 RecName: Full=Chlorophyll a-b binding protein, chloroplastic; AltName: Full=LHCII type I CAB; Short=LHCP; Flags: Precursor >A2XJ35.1 RecName: Full=Chlorophyll a-b binding protein, chloroplastic; AltName: Fu	-
TraesCS5A03G0794300	TraesCS5A02G327900	3.1496	15.5067	20.6789	2342.6	2213.89	2035.5	13.1117	2197.33	-7.38891	1.67e-40	1.06e-36	Chr5A	Q9M084.1 RecName: Full=Aspartate--tRNA ligase 2, cytoplasmic; AltName: Full=Aspartyl-tRNA synthetase; Short=AspRS; AltName: Full=Protein IMPAIRED IN BABA-INDUCED DISEASE IMMUNITY 1 && PF00152:tRNA synthetases class	tRNA-synt_2
TraesCS5A03G0795900	TraesCS5A02G328600	19.9475	9.9686	13.4413	35.5078	37.3355	59.9196	14.4524	44.2543	-1.61365	0.0011424	0.017596	Chr5A	F4I9E1.1 RecName: Full=Protein NUCLEAR FUSION DEFECTIVE 4 && PF06813:Nodulin-like	-
TraesCS5A03G0819000	TraesCS5A02G340800	20.9973	12.1838	7.2376	54.6273	35.3174	33.4845	13.4729	41.1431	-1.61146	0.00225184	0.0285669	Chr5A	PF05056:Protein of unknown function (DUF674)	-
TraesCS5A03G0821000	TraesCS5A02G341700	272.965	186.081	176.804	97.4188	85.7707	54.6325	211.95	79.274	1.42077	3.14e-07	2.6e-05	Chr5A	B7F8P5.1 RecName: Full=Auxin-responsive protein SAUR36; AltName: Full=Protein SMALL AUXIN UP RNA 36 && PF02519:Auxin responsive protein	Auxin_inducible
TraesCS5A03G0821900	TraesCS5A02G342000	82.9394	47.6278	98.2246	40.0601	24.2176	41.415	76.2639	35.2309	1.11154	0.00405947	0.0436257	Chr5A	B7F8P5.1 RecName: Full=Auxin-responsive protein SAUR36; AltName: Full=Protein SMALL AUXIN UP RNA 36 && PF02519:Auxin responsive protein	Auxin_inducible
TraesCS5A03G0835700	TraesCS5A02G347900	497.637	230.385	369.118	681.931	711.392	1015.11	365.713	802.811	-1.13396	1.95e-06	0.000117963	Chr5A	PF15511:Centromere kinetochore component CENP-T histone fold	-
TraesCS5A03G0843800	TraesCS5A02G350600	10.4987	8.86098	4.13577	150.225	243.185	171.828	7.8318	188.413	-4.59197	5.72e-28	1.42e-24	Chr5A	P12329.1 RecName: Full=Chlorophyll a-b binding protein 1, chloroplastic; AltName: Full=LHCII type I CAB-1; Short=LHCP; Flags: Precursor && PF00504:Chlorophyll A-B binding protein	-
TraesCS5A03G0853600	TraesCS5A02G355000	0	0	0	8.1941	8.07254	2.64351	0	6.30338	-5.00763	0.00468837	0.0480023	Chr5A	Q9C8E6.1 RecName: Full=Protein PLASTID MOVEMENT IMPAIRED 1 && PF10358:N-terminal C2 in EEIG1 and EHBP1 proteins	-
TraesCS5A03G0887500	TraesCS5A02G368400	1151.7	583.717	839.562	2052.17	2645.77	2017	858.327	2238.31	-1.38233	1.34e-11	3.96e-09	Chr5A	P19683.1 RecName: Full=31 kDa ribonucleoprotein, chloroplastic; Flags: Precursor && PF00076:RNA recognition motif. (a.k.a. RRM, RBD, or RNP domain)	RRM_1
TraesCS5A03G0889300	TraesCS5A02G369300	0	3.32287	0	130.195	92.8342	8.8117	1.10762	77.2804	-6.14593	0.000444933	0.0086572	Chr5A	-	-
TraesCS5A03G0890200	TraesCS5A02G369800	0	0	0	7.28365	6.0544	6.16819	0	6.50208	-5.05528	0.00338521	0.0384037	Chr5A	P12952.1 RecName: Full=Dehydrin DHN2; AltName: Full=B9 && PF00257:Dehydrin	-
TraesCS5A03G0900000	TraesCS5A02G374600	536.482	528.336	842.663	213.957	284.557	351.587	635.827	283.367	1.16597	1.98e-07	1.75e-05	Chr5A	PF13855:Leucine rich repeat	-
TraesCS5A03G0906500	TraesCS5A02G378800	6.2992	12.1838	76.5118	0	2.01813	4.40585	31.6649	2.14133	3.8789	0.00010687	0.00294686	Chr5A	P29250.2 RecName: Full=Linoleate 9S-lipoxygenase 2; AltName: Full=Lipoxygenase 2; AltName: Full=Lipoxygenase L-2 && PF00305:Lipoxygenase	Lipoxygenase
TraesCS5A03G0912000	TraesCS5A02G380900	2.09973	4.43049	0	8.1941	17.1541	88.9982	2.17674	38.1155	-4.15125	1.94e-05	0.0007572	Chr5A	Q75KV9.1 RecName: Full=Transcription factor BHLH148; AltName: Full=Basic helix-loop-helix protein 148; Short=OsbHLH148; AltName: Full=bHLH transcription factor bHLH148 && -	-
TraesCS5A03G0912900	TraesCS5A02G381100	16.7979	19.9372	31.0183	209.405	246.212	218.53	22.5844	224.716	-3.31104	1.61e-28	4.16e-25	Chr5A	A6YIH8.1 RecName: Full=Premnaspirodiene oxygenase; Short=HPO; AltName: Full=Cytochrome P450 71D55 && PF00067:Cytochrome P450	p450
TraesCS5A03G0919800	TraesCS5A02G383800	14.6981	11.0762	24.8146	50.9855	57.5168	53.7514	16.863	54.0846	-1.67625	0.000176462	0.00430867	Chr5A	Q84MN7.1 RecName: Full=Heat stress transcription factor A-2a; AltName: Full=Heat shock protein 41; AltName: Full=Heat stress transcription factor 11; Short=OsHsf-11; AltName: Full=Heat stress transcription factor 4;	HSF_DNA-bind
TraesCS5A03G0927500	TraesCS5A02G386900	15.748	12.1838	0	59.1796	61.5531	39.6527	9.31061	53.4618	-2.52613	3.96e-05	0.00134461	Chr5A	Q9C503.1 RecName: Full=Protein NDH-DEPENDENT CYCLIC ELECTRON FLOW 5; Flags: Precursor && -	-
TraesCS5A03G0935400	TraesCS5A02G391700	22.0472	26.5829	28.9504	3.64182	7.06347	4.40585	25.8602	5.03705	2.37058	0.000358384	0.00734256	Chr5A	Q10CQ1.2 RecName: Full=MADS-box transcription factor 14; AltName: Full=FDRMADS6; AltName: Full=OsMADS14; AltName: Full=Protein AGAMOUS-like 10; AltName: Full=Protein APETALA1-like B; AltName: Full=RMADS211 && PF0031	K-box
TraesCS5A03G0957300	TraesCS5A02G402600	122.834	108.547	110.632	295.898	285.566	190.333	114.004	257.266	-1.173	5.46e-07	4.16e-05	Chr5A	P80883.1 RecName: Full=Cytochrome b6-f complex subunit 7; AltName: Full=Cytochrome b6-f complex subunit PetM; AltName: Full=Cytochrome b6-f complex subunit VII && PF08041:PetM family of cytochrome b6f complex subuni	-
TraesCS5A03G0958100	TraesCS5A02G403300	17.8477	27.6906	26.8825	50.9855	46.4171	64.3254	24.1403	53.9093	-1.16167	0.00455575	0.0470729	Chr5A	Q7Y0D4.1 RecName: Full=Thioredoxin-like protein HCF164, chloroplastic; AltName: Full=Protein HIGH CHLOROPHYLL FLUORESCENCE 164; Flags: Precursor && PF00085:Thioredoxin	-
TraesCS5A03G0960700	TraesCS5A02G404800	17.8477	12.1838	17.577	47.3437	54.4896	35.2468	15.8695	45.6934	-1.52113	0.00103695	0.0164269	Chr5A	Q75KA9.1 RecName: Full=Cytochrome c biogenesis protein CCS1, chloroplastic; AltName: Full=C-type cytochrome synthesis protein 1; Flags: Precursor && PF05140:ResB-like family	-
TraesCS5A03G0987900	TraesCS5A02G417000	61.9421	44.3049	33.0862	97.4188	127.142	83.7112	46.4444	102.757	-1.14407	0.000604896	0.0109536	Chr5A	Q9FI13.1 RecName: Full=Probable ribose-5-phosphate isomerase 4, chloroplastic; AltName: Full=Phosphoriboisomerase 4; Flags: Precursor && PF06026:Ribose 5-phosphate isomerase A (phosphoriboisomerase A)	Rib_5-P_isom_A
TraesCS5A03G1004700	TraesCS5A02G423600	10.4987	3.32287	6.20366	30.045	43.3899	17.6234	6.67506	30.3528	-2.17624	0.000939849	0.0152313	Chr5A	Q84X53.2 RecName: Full=Transcription termination factor MTEF1, chloroplastic; AltName: Full=Mitochondrial transcription termination factor 1; AltName: Full=Protein EMBRYO DEFECTIVE 93; AltName: Full=Protein SINGLET	-
TraesCS5A03G1005300	TraesCS5A02G423900	85.0392	70.8878	68.2402	166.613	146.315	157.729	74.7224	156.886	-1.07041	1.58e-05	0.000646126	Chr5A	A2XMN1.1 RecName: Full=Transcription factor PCF6 && PF03634:TCP family transcription factor	TCP
TraesCS5A03G1006000	TraesCS5A02G424400	0	3.32287	1.03394	29.1346	57.5168	1.76234	1.45227	29.4713	-4.36009	0.000111129	0.00303483	Chr5A	Q10CE4.1 RecName: Full=Peroxisomal (S)-2-hydroxy-acid oxidase GLO1; AltName: Full=Glycolate oxidase 1; Short=GOX 1; Short=OsGLO1; AltName: Full=Short chain alpha-hydroxy acid oxidase GLO1 >B8AKX6.1 RecName: Full=Per	FMN_dh
TraesCS5A03G1033500	TraesCS5A02G437900	38.8451	39.8744	75.4778	101.971	106.961	109.265	51.3991	106.066	-1.04284	0.00137337	0.020154	Chr5A	Q6VBB2.1 RecName: Full=Heat stress transcription factor A-2b; AltName: Full=Heat stress transcription factor 18; Short=OsHsf-18; AltName: Full=Heat stress transcription factor 5; Short=rHsf5 && -	-
TraesCS5A03G1048100	TraesCS5A02G445100	135.433	127.377	124.073	226.703	363.264	244.965	128.961	278.311	-1.10816	1.73e-06	0.000106632	Chr5A	Q851Q6.1 RecName: Full=Probable GTP-binding protein OBGC2 && PF01018:GTP1/OBG|PF01926:50S ribosome-binding GTPase	-
TraesCS5A03G1050300	TraesCS5A02G445800	12.5984	13.2915	21.7128	40.9705	51.4624	44.0585	15.8676	45.4971	-1.516	0.00107157	0.0168112	Chr5A	-	-
TraesCS5A03G1069900	TraesCS5A02G452600	1.04987	0	0	81.941	38.3446	52.8702	0.349955	57.7186	-7.24475	1.13e-08	1.53e-06	Chr5A	O64864.1 RecName: Full=Protein YLS3; AltName: Full=Protein YELLOW-LEAF-SPECIFIC GENE 3; AltName: Full=Xylogen-like protein 9; Short=AtXYLP9; Flags: Precursor && PF14368:Probable lipid transfer	-
TraesCS5A03G1070000	TraesCS5A02G452700	95.5378	49.843	68.2402	352.346	220.986	299.598	71.207	290.977	-2.02977	5.56e-14	3.05e-11	Chr5A	O64864.1 RecName: Full=Protein YLS3; AltName: Full=Protein YELLOW-LEAF-SPECIFIC GENE 3; AltName: Full=Xylogen-like protein 9; Short=AtXYLP9; Flags: Precursor && PF14368:Probable lipid transfer	-
TraesCS5A03G1073200	TraesCS5A02G454300	0	0	0	8.1941	24.2176	4.40585	0	12.2725	-5.96579	0.000135875	0.00354878	Chr5A	P04784.1 RecName: Full=Chlorophyll a-b binding protein, chloroplastic; AltName: Full=LHCII type I CAB; Short=LHCP; Flags: Precursor && PF00504:Chlorophyll A-B binding protein	-
TraesCS5A03G1074100	TraesCS5A02G454900	125.984	96.3632	110.632	265.853	305.747	165.66	110.993	245.753	-1.14465	9.26e-06	0.000420229	Chr5A	Q8W593.1 RecName: Full=Probable lactoylglutathione lyase, chloroplastic; AltName: Full=Glyoxalase I; Flags: Precursor && PF00903:Glyoxalase/Bleomycin resistance protein/Dioxygenase superfamily	Glyoxalase
TraesCS5A03G1076400	TraesCS5A02G456000	66.1416	73.1031	43.4256	168.434	183.65	185.927	60.8901	179.337	-1.56056	4.03e-09	6.24e-07	Chr5A	Q8W496.1 RecName: Full=Protochlorophyllide-dependent translocon component 52, chloroplastic; AltName: Full=ACD1-like protein; AltName: Full=Protein TIC 55-IV; AltName: Full=Translocon at the inner envelope membrane	-
TraesCS5A03G1079500	TraesCS5A02G457500	37.7952	11.0762	41.3577	164.792	221.995	153.324	30.0764	180.037	-2.57445	7.72e-13	3.1e-10	Chr5A	P36213.1 RecName: Full=Photosystem I reaction center subunit II, chloroplastic; AltName: Full=Photosystem I 20 kDa subunit; Short=PSI-D; Flags: Precursor && PF02531:PsaD	-
TraesCS5A03G1087600	TraesCS5A02G460300	68.2413	52.0583	34.1201	183.912	124.115	136.581	51.4732	148.203	-1.52713	8.72e-07	6.04e-05	Chr5A	Q8H6G8.1 RecName: Full=Probable inorganic phosphate transporter 1-8; Short=OsPT8; Short=OsPht1;8; AltName: Full=H(+)/Pi cotransporter && PF00083:Sugar (and other) transporter	Sugar_tr
TraesCS5A03G1090600	TraesCS5A02G461500	85.0392	86.3946	70.3081	183.912	217.959	115.433	80.5806	172.435	-1.09628	0.000100467	0.0028103	Chr5A	Q9SGH4.1 RecName: Full=Photosynthetic NDH subunit of lumenal location 3, chloroplastic; AltName: Full=PsbQ-like protein 2; Flags: Precursor && PF05757:Oxygen evolving enhancer protein 3 (PsbQ)	-
TraesCS5A03G1134200	TraesCS5A02G482800	45.1443	35.4439	38.2559	222.151	326.938	125.126	39.6147	224.738	-2.50165	8.87e-14	4.72e-11	Chr5A	P13194.2 RecName: Full=Photosystem I reaction center subunit IV, chloroplastic; Short=PSI-E; AltName: Full=Photosystem I 10.8 kDa polypeptide; Flags: Precursor && PF02427:Photosystem I reaction centre subunit IV / P	-
TraesCS5A03G1140900	TraesCS5A02G486300	200.524	197.157	157.159	298.629	405.645	432.655	184.947	378.976	-1.03538	5.15e-07	3.97e-05	Chr5A	Q9S7Q2.1 RecName: Full=Pentatricopeptide repeat-containing protein At1g74850, chloroplastic; AltName: Full=Protein PLASTID TRANSCRIPTIONALLY ACTIVE 2; Flags: Precursor && PF17177:Pentacotripeptide-repeat region of P	-
TraesCS5A03G1156100	TraesCS5A02G492900	100.787	119.623	85.8172	240.36	290.611	261.708	102.076	264.226	-1.37308	4.38e-10	8.94e-08	Chr5A	-	-
TraesCS5A03G1159800	TraesCS5A02G495100	79.7898	89.7174	116.836	437.929	601.404	225.58	95.4476	421.638	-2.14162	4.85e-13	2.09e-10	Chr5A	P12859.2 RecName: Full=Glyceraldehyde-3-phosphate dehydrogenase B, chloroplastic; AltName: Full=NADP-dependent glyceraldehydephosphate dehydrogenase subunit B; Flags: Precursor && PF00044:Glyceraldehyde 3-phosphate	-
TraesCS5A03G1168400	TraesCS5A02G498700	202.624	85.2869	99.2585	261.301	389.5	286.38	129.057	312.394	-1.27372	1.14e-05	0.000495537	Chr5A	Q8LSQ2.1 RecName: Full=Probable signal recognition particle 43 kDa protein, chloroplastic; Flags: Precursor && PF00385:Chromo (CHRromatin Organisation MOdifier) domain|PF12796:Ankyrin repeats (3 copies)	Chromo
TraesCS5A03G1171300	TraesCS5A02G499900	152.231	136.238	158.193	267.674	304.738	438.823	148.887	337.078	-1.17914	1.57e-07	1.46e-05	Chr5A	Q2HXL0.2 RecName: Full=Respiratory burst oxidase homolog protein C; AltName: Full=NADPH oxidase RBOHC; AltName: Full=StRBOHC && PF08022:FAD-binding domain|PF08030:Ferric reductase NAD binding domain|PF08414:Respirat	FAD_binding_8
TraesCS5A03G1181100	TraesCS5A02G503800	103.937	57.5964	52.7311	223.972	113.016	149.799	71.4214	162.262	-1.18445	0.00030996	0.00662226	Chr5A	-	-
TraesCS5A03G1184100	TraesCS5A02G504700	17.8477	24.3677	18.611	53.7169	56.5078	56.3949	20.2755	55.5398	-1.45591	0.00035142	0.00723752	Chr5A	O49619.1 RecName: Full=Pentatricopeptide repeat-containing protein At4g35130, chloroplastic; Flags: Precursor && PF01535:PPR repeat|PF14432:DYW family of nucleic acid deaminases|PF13041:PPR repeat family	PPR
TraesCS5A03G1187100	TraesCS5A02G505800	176.378	130.699	135.447	369.645	454.08	275.806	147.508	366.511	-1.31148	8.43e-09	1.19e-06	Chr5A	PF13301:Protein of unknown function (DUF4079)	-
TraesCS5A03G1194600	TraesCS5A02G509000	204.724	100.794	129.243	381.481	432.89	389.477	144.92	401.283	-1.46787	5.58e-10	1.09e-07	Chr5A	-	-
TraesCS5A03G1198400	TraesCS5A02G510900	91.3384	115.193	211.958	281.331	252.267	416.793	139.496	316.797	-1.18309	4.5e-05	0.00148331	Chr5A	Q9FVS9.1 RecName: Full=Alkane hydroxylase MAH1; AltName: Full=Cytochrome P450 96A15; AltName: Full=Protein MID-CHAIN ALKANE HYDROXYLASE 1 && PF00067:Cytochrome P450	p450
TraesCS5A03G1198800	TraesCS5A02G511100	40.9448	53.1659	98.2246	223.972	119.07	217.649	64.1117	186.897	-1.54338	4.94e-06	0.000254275	Chr5A	Q9FMY1.1 RecName: Full=Cytochrome P450 86B1 && PF00067:Cytochrome P450	p450
TraesCS5A03G1202400	TraesCS5A02G512800	7.34906	8.86098	12.4073	31.866	19.1723	38.7715	9.53912	29.9366	-1.6518	0.004898	0.0493748	Chr5A	Q5RJF7.1 RecName: Full=Voltage-dependent calcium channel subunit alpha-2/delta-4; AltName: Full=Voltage-gated calcium channel subunit alpha-2/delta-4; Contains: RecName: Full=Voltage-dependent calcium channel subuni	VWA
TraesCS5A03G1203300	TraesCS5A02G513500	418.897	259.184	356.71	681.021	874.861	632.68	344.93	729.521	-1.07937	5.09e-08	5.7e-06	Chr5A	Q9ZST0.2 RecName: Full=50S ribosomal protein L5, chloroplastic; Flags: Precursor && PF00673:ribosomal L5P family C-terminus|PF00281:Ribosomal protein L5	-
TraesCS5A03G1208100	TraesCS5A02G515800	2.09973	2.21524	8.27154	15.4777	47.4262	63.4442	4.19551	42.1161	-3.31779	4.94e-06	0.000254275	Chr5A	O81037.1 RecName: Full=Transcription factor bHLH70; AltName: Full=Basic helix-loop-helix protein 70; Short=AtbHLH70; Short=bHLH 70; AltName: Full=Transcription factor EN 13; AltName: Full=bHLH transcription factor b	HLH
TraesCS5A03G1208500	TraesCS5A02G516100	216.272	121.838	139.582	338.69	407.663	425.605	159.231	390.653	-1.29382	1.22e-08	1.63e-06	Chr5A	Q94JX9.2 RecName: Full=Nascent polypeptide-associated complex subunit alpha-like protein 2; Short=NAC-alpha-like protein 2; AltName: Full=Alpha-NAC-like protein 2 && PF19026:HYPK UBA domain|PF01849:NAC domain	-
TraesCS5A03G1222900	TraesCS5A02G523600	54.593	43.1973	39.2898	122.001	102.925	96.0475	45.6934	106.991	-1.22736	5.28e-05	0.00167561	Chr5A	-	-
TraesCS5A03G1224200	TraesCS5A02G524400	16.7979	14.3991	16.5431	72.8365	90.8161	67.8501	15.9133	77.1675	-2.27496	1.07e-08	1.46e-06	Chr5A	Q10SM7.1 RecName: Full=Peroxisomal membrane protein 11-1; AltName: Full=OsPEX11-1; AltName: Full=Peroxin-11-1 && PF05648:Peroxisomal biogenesis factor 11 (PEX11)	-
TraesCS5A03G1225100	TraesCS5A02G524800	77.6901	88.6098	95.1227	219.42	260.339	169.185	87.1409	216.315	-1.31017	1.02e-07	1.01e-05	Chr5A	Q9FJ82.1 RecName: Full=Dihydrodipicolinate reductase-like protein CRR1, chloroplastic; AltName: Full=4-hydroxy-tetrahydrodipicolinate reductase 3; Short=HTPA reductase 3; AltName: Full=Protein CHLORORESPIRATORY REDU	DapB_N
TraesCS5A03G1236300	TraesCS5A02G529500	137.532	117.408	110.632	426.093	299.693	215.887	121.857	313.891	-1.36485	7.98e-08	8.19e-06	Chr5A	Q0MW30.1 RecName: Full=E3 ubiquitin-protein ligase NEURL1B; AltName: Full=Neuralized-2; Short=NEUR2; AltName: Full=Neuralized-like protein 1B; AltName: Full=Neuralized-like protein 2; AltName: Full=Neuralized-like p	-
TraesCS5A03G1240000	TraesCS5A02G531300	1.04987	2.21524	1.03394	5.46273	29.263	22.0293	1.43302	18.9183	-3.73034	0.000441442	0.00859407	Chr5A	Q39152.1 RecName: Full=Fatty acyl-CoA reductase 1 && PF03015:Male sterility protein|PF07993:Male sterility protein	NAD_binding_4
TraesCS5A03G1255500	TraesCS5A02G537300	199.475	163.928	170.601	490.736	374.364	324.271	178.001	396.457	-1.15496	2.47e-08	3.04e-06	Chr5A	Q9LD07.1 RecName: Full=Expansin-B7; AltName: Full=Beta-expansin-7; AltName: Full=OsEXPB7; AltName: Full=OsaEXPb1.12; Flags: Precursor && PF03330:Lytic transglycolase|PF01357:Expansin C-terminal domain	-
TraesCS5A03G1274300	TraesCS5A02G545700	353.805	239.246	288.47	679.2	825.417	432.655	293.84	645.757	-1.13476	6.36e-07	4.71e-05	Chr5A	PF01329:Pterin 4 alpha carbinolamine dehydratase|PF04043:Plant invertase/pectin methylesterase inhibitor	-
TraesCS5A03G1274600	TraesCS5A02G545900	46.1941	39.8744	42.3917	91.0456	104.943	87.2358	42.8201	94.4081	-1.13896	0.00020963	0.00492208	Chr5A	O64792.1 RecName: Full=Phosphatidylinositol N-acetylglucosaminyltransferase subunit P && PF08510:PIG-P	-
TraesCS5A03G1275400	TraesCS5A02G546500	10.4987	12.1838	5.16971	32.7764	38.3446	30.841	9.28407	33.9873	-1.8758	0.00081749	0.0137104	Chr5A	PF02517:CPBP intramembrane metalloprotease	-
TraesCS5A03G1278700	TraesCS5A02G547700	75.5904	50.9506	99.2585	228.524	143.288	192.095	75.2665	187.969	-1.31919	4.88e-06	0.000252155	Chr5A	Q2QYE1.2 RecName: Full=Probable apyrase 3; Short=OsAPY3; AltName: Full=ATP-diphosphatase; AltName: Full=ATP-diphosphohydrolase; AltName: Full=Adenosine diphosphatase; Short=ADPase; Flags: Precursor && PF01150:GDA1/C	-
TraesCS5A03G1287700	TraesCS5A02G551500	83.9893	114.085	146.82	39.1496	52.4715	47.5832	114.965	46.4014	1.31086	3.42e-05	0.00119826	Chr5A	PF13962:Domain of unknown function	-
TraesCS5A03G1295300	TraesCS5A02G554600	7.34906	4.43049	42.3917	0.910456	3.0272	0	18.0571	1.31255	3.82922	0.00116801	0.0179013	Chr5A	PF03766:Remorin, N-terminal region|PF03763:Remorin, C-terminal region	-
TraesCS5B03G0014800	TraesCS5B02G006500	2202.62	1939.45	2135.09	5021.16	6568.02	3094.67	2092.39	4894.62	-1.22587	1.7e-09	2.93e-07	Chr5B	P93184.1 RecName: Full=Lipoxygenase 2.1, chloroplastic; AltName: Full=LOX-100; AltName: Full=LOX2:Hv:1; Flags: Precursor && PF00305:Lipoxygenase|PF01477:PLAT/LH2 domain	Lipoxygenase
TraesCS5B03G0035300	TraesCS5B02G015700	10.4987	16.6143	8.27154	62.8214	57.5168	14.9799	11.7948	45.1061	-1.93689	0.00108066	0.0168946	Chr5B	P81370.2 RecName: Full=Thaumatin-like protein; AltName: Allergen=Act d 2; Flags: Precursor && PF00314:Thaumatin family	Thaumatin
TraesCS5B03G0035700	TraesCS5B02G016000	17.8477	29.9058	19.6449	67.3737	73.6619	37.8903	22.4661	59.642	-1.40927	0.00115259	0.0177195	Chr5B	P33679.2 RecName: Full=Zeamatin; Flags: Precursor && PF00314:Thaumatin family	Thaumatin
TraesCS5B03G0035900	TraesCS5B02G016100	7.34906	9.9686	3.10183	59.1796	49.4443	12.3364	6.8065	40.3201	-2.5709	0.000150348	0.00382785	Chr5B	P81370.2 RecName: Full=Thaumatin-like protein; AltName: Allergen=Act d 2; Flags: Precursor && PF00314:Thaumatin family	Thaumatin
TraesCS5B03G0067900	TraesCS5B02G029000	36.7453	28.7982	23.7807	82.8515	100.907	49.3455	29.7747	77.7012	-1.3815	0.00040309	0.00802668	Chr5B	Q9M0Z3.2 RecName: Full=K(+) efflux antiporter 3, chloroplastic; Short=AtKEA3; Flags: Precursor && PF00999:Sodium/hydrogen exchanger family|PF02254:TrkA-N domain	Na_H_Exchanger
TraesCS5B03G0095800	TraesCS5B02G036800	31.496	12.1838	38.2559	50.9855	114.025	87.2358	27.3119	84.082	-1.61631	0.000224074	0.00517239	Chr5B	Q9SA52.1 RecName: Full=Chloroplast stem-loop binding protein of 41 kDa b, chloroplastic; Short=CSP41-b; AltName: Full=Heteroglycan-interacting protein 1.3; AltName: Full=Protein CHLOROPLAST RNA BINDING; AltName: Ful	Epimerase
TraesCS5B03G0127200	TraesCS5B02G049800	73.4906	95.2555	112.7	201.211	314.829	252.015	93.8153	256.018	-1.44706	7.39e-09	1.06e-06	Chr5B	Q9AR38.1 RecName: Full=Protoporphyrinogen oxidase, chloroplastic; Short=PPO; AltName: Full=Protoporphyrinogen oxidase 1; Flags: Precursor && PF01593:Flavin containing amine oxidoreductase	Amino_oxidase
TraesCS5B03G0136900	TraesCS5B02G054200	19.9475	17.722	20.6789	73.7469	43.3899	30.841	19.4494	49.3259	-1.34181	0.00425607	0.045035	Chr5B	Q84TE6.2 RecName: Full=NAC domain-containing protein 21/22; Short=ANAC021/ANAC022 && PF02365:No apical meristem (NAM) protein	NAM
TraesCS5B03G0150700	TraesCS5B02G060200	41.9947	33.2287	72.376	64.6424	120.079	125.126	49.1998	103.283	-1.06695	0.00393065	0.0426754	Chr5B	Q6YV88.1 RecName: Full=Ent-cassadiene C2-hydroxylase; AltName: Full=Cytochrome P450 71Z7 && PF00067:Cytochrome P450	p450
TraesCS5B03G0150800	TraesCS5B02G060300	41.9947	43.1973	64.1045	118.359	131.179	126.888	49.7655	125.475	-1.33217	4.87e-06	0.000251893	Chr5B	Q6YV88.1 RecName: Full=Ent-cassadiene C2-hydroxylase; AltName: Full=Cytochrome P450 71Z7 && PF00067:Cytochrome P450	p450
TraesCS5B03G0153600	TraesCS5B02G061600	8.39893	7.75336	6.20366	43.7019	36.3264	32.6033	7.45198	37.5439	-2.33397	2.96e-05	0.00106937	Chr5B	P0DKC6.1 RecName: Full=11-beta-hydroxysteroid dehydrogenase 1B; AltName: Full=17-beta-hydroxysteroid dehydrogenase 1B; AltName: Full=Hydroxysteroid dehydrogenase 1; Short=AtHSD1 >P0DKC5.1 RecName: Full=11-beta-hydro	adh_short
TraesCS5B03G0159600	TraesCS5B02G064000	148.031	197.157	148.888	620.931	369.319	546.325	164.692	512.192	-1.63875	1.25e-13	6.37e-11	Chr5B	Q12628.1 RecName: Full=Glucan 1,3-beta-glucosidase; AltName: Full=Exo-1,3-beta-glucanase; Flags: Precursor && PF00150:Cellulase (glycosyl hydrolase family 5)	-
TraesCS5B03G0208300	TraesCS5B02G083300	4.19947	0	0	31.866	31.2811	13.2176	1.39982	25.4549	-4.17031	3.69e-05	0.00126993	Chr5B	PF06549:Protein of unknown function (DUF1118)	-
TraesCS5B03G0211600	TraesCS5B02G084500	3.1496	2.21524	2.06789	30.9555	20.1813	17.6234	2.47758	22.9201	-3.20902	0.000104449	0.00289843	Chr5B	PF06549:Protein of unknown function (DUF1118)	-
TraesCS5B03G0218000	TraesCS5B02G087100	95.5378	80.8564	119.937	47.3437	43.3899	44.0585	98.7772	44.9307	1.13713	0.000236798	0.0053982	Chr5B	-	-
TraesCS5B03G0219200	TraesCS5B02G087600	53.5432	46.5201	37.2219	119.27	80.7254	83.7112	45.7618	94.5687	-1.04852	0.00124864	0.0188105	Chr5B	Q9LZ56.1 RecName: Full=Dof zinc finger protein DOF5.1; Short=AtDOF5.1 && PF02701:Dof domain, zinc finger	zf-Dof
TraesCS5B03G0219600	TraesCS5B02G087800	23.0971	17.722	15.5091	51.896	57.5168	35.2468	18.7761	48.2199	-1.35854	0.00239985	0.0298686	Chr5B	Q93PP8.3 RecName: Full=Rubredoxin-2; Short=Rd-2 && PF00301:Rubredoxin	Rubredoxin
TraesCS5B03G0247300	TraesCS5B02G097200	47.244	55.3811	70.3081	9.10456	24.2176	22.9104	57.6444	18.7442	1.62451	0.000329722	0.00689759	Chr5B	Q9Y4D2.3 RecName: Full=Sn1-specific diacylglycerol lipase alpha; Short=DGL-alpha; AltName: Full=Neural stem cell-derived dendrite regulator && PF01764:Lipase (class 3)	Lipase_3
TraesCS5B03G0259600	TraesCS5B02G102100	25.1968	29.9058	28.9504	132.927	131.179	99.5722	28.0177	121.226	-2.11303	4.84e-11	1.29e-08	Chr5B	-	-
TraesCS5B03G0275600	TraesCS5B02G108300	115.485	85.2869	75.4778	224.883	376.382	292.548	92.0833	297.938	-1.69285	2.41e-11	6.78e-09	Chr5B	Q05024.1 RecName: Full=Protein TRI1 && PF02201:SWIB/MDM2 domain	-
TraesCS5B03G0294300	TraesCS5B02G111800	70.341	39.8744	59.9687	214.868	266.394	127.77	56.728	203.01	-1.83593	4.83e-09	7.31e-07	Chr5B	Q9ZP21.1 RecName: Full=Thioredoxin M-type, chloroplastic; Short=Trx-M; Flags: Precursor && PF00085:Thioredoxin	-
TraesCS5B03G0310900	TraesCS5B02G115300	96.5877	90.825	97.1906	331.406	355.192	185.046	94.8678	290.548	-1.61331	6.05e-10	1.18e-07	Chr5B	Q40677.2 RecName: Full=Fructose-bisphosphate aldolase, chloroplastic; AltName: Full=Chloroplastic aldolase; Short=AldP; Flags: Precursor && PF00274:Fructose-bisphosphate aldolase class-I	-
TraesCS5B03G0353100	TraesCS5B02G129000	59.8424	54.2735	71.3421	126.553	152.369	97.8099	61.8193	125.577	-1.01942	0.000424797	0.00835162	Chr5B	-	-
TraesCS5B03G0359400	TraesCS5B02G130000	30.4461	24.3677	44.4595	2.73137	2.01813	7.93053	33.0911	4.22668	2.95016	1.59e-05	0.000648382	Chr5B	PF07876:Stress responsive A/B Barrel Domain	-
TraesCS5B03G0374400	TraesCS5B02G135000	26.2467	32.1211	15.5091	53.7169	64.5803	58.1572	24.6256	58.8181	-1.25878	0.00198697	0.0261506	Chr5B	PF03435:Saccharopine dehydrogenase NADP binding domain	Saccharop_dh
TraesCS5B03G0403600	TraesCS5B02G145800	9.4488	2.21524	3.10183	28.2241	28.2539	20.2669	4.92196	25.5816	-2.37132	0.00090703	0.0148339	Chr5B	Q8VZW3.1 RecName: Full=Probable chalcone--flavonone isomerase 3; Short=Chalcone isomerase 3; AltName: Full=Chalcone isomerase-like 1 && PF02431:Chalcone-flavanone isomerase	-
TraesCS5B03G0408400	TraesCS5B02G147600	114.435	74.2107	98.2246	271.316	477.289	377.141	95.6236	375.248	-1.97021	2.7e-15	1.92e-12	Chr5B	-	-
TraesCS5B03G0437300	TraesCS5B02G160700	7.34906	16.6143	7.2376	43.7019	26.2357	27.3163	10.4003	32.418	-1.6477	0.00445787	0.0463635	Chr5B	Q9S9N9.1 RecName: Full=Cinnamoyl-CoA reductase 1; Short=AtCCR1; AltName: Full=Protein IRREGULAR XYLEM 4 && PF01370:NAD dependent epimerase/dehydratase family	Epimerase
TraesCS5B03G0441800	TraesCS5B02G162600	916.533	850.654	1084.61	2347.15	3564.03	1243.33	950.598	2384.84	-1.32685	0.00151808	0.0216667	Chr5B	Q40004.1 RecName: Full=Ribulose bisphosphate carboxylase small chain, chloroplastic; Short=RuBisCO small subunit; Flags: Precursor && PF00101:Ribulose bisphosphate carboxylase, small chain|PF12338:Ribulose-1,5-bisph	-
TraesCS5B03G0442000	TraesCS5B02G162800	460.891	410.928	523.175	2169.62	3014.08	809.795	464.998	1997.83	-2.10301	7.53e-05	0.00221311	Chr5B	Q40004.1 RecName: Full=Ribulose bisphosphate carboxylase small chain, chloroplastic; Short=RuBisCO small subunit; Flags: Precursor && PF12338:Ribulose-1,5-bisphosphate carboxylase small subunit|PF00101:Ribulose bisp	-
TraesCS5B03G0448900	TraesCS5B02G166000	37.7952	28.7982	26.8825	60.0901	64.5803	67.8501	31.1586	64.1735	-1.04213	0.00410599	0.0439765	Chr5B	Q9FIK8.1 RecName: Full=Protein C2-DOMAIN ABA-RELATED 11; Contains: RecName: Full=Protein C2-DOMAIN ABA-RELATED 11, N-terminally processed && PF00168:C2 domain	C2
TraesCS5B03G0460100	TraesCS5B02G171100	53.5432	58.704	35.1541	124.732	208.877	126.888	49.1337	153.499	-1.6434	1.93e-07	1.72e-05	Chr5B	O48529.1 RecName: Full=Rhodanese-like domain-containing protein 9, chloroplastic; AltName: Full=Sulfurtransferase 9; Short=AtStr9; Flags: Precursor && PF00581:Rhodanese-like domain	Rhodanese
TraesCS5B03G0460200	TraesCS5B02G171200	394.75	347.793	322.59	728.365	891.006	620.344	355.044	746.572	-1.07157	1.07e-09	1.96e-07	Chr5B	P82277.1 RecName: Full=30S ribosomal protein 2, chloroplastic; AltName: Full=Plastid-specific 30S ribosomal protein 2; Short=PSRP-2; Flags: Precursor && PF00076:RNA recognition motif. (a.k.a. RRM, RBD, or RNP domain	RRM_1
TraesCS5B03G0461500	TraesCS5B02G172200	1061.41	686.726	756.846	2139.57	1615.52	1495.35	834.996	1750.14	-1.06747	9.31e-09	1.3e-06	Chr5B	Q84TH6.1 RecName: Full=Dirigent protein 23; Short=AtDIR23; Flags: Precursor && PF03018:Dirigent-like protein	-
TraesCS5B03G0468100	TraesCS5B02G175000	17.8477	6.64573	17.577	49.1646	44.399	45.8208	14.0235	46.4615	-1.72262	0.000408099	0.00810561	Chr5B	P07370.1 RecName: Full=Chlorophyll a-b binding protein 1B, chloroplastic; AltName: Full=LHCII type I CAB-1B; Short=LHCP; Flags: Precursor && PF00504:Chlorophyll A-B binding protein	-
TraesCS5B03G0480800	TraesCS5B02G180300	146.981	168.359	160.261	294.988	422.799	359.517	158.534	359.101	-1.17908	5.29e-09	7.91e-07	Chr5B	Q9SFU3.1 RecName: Full=Purple acid phosphatase 15; AltName: Full=Phytase; Flags: Precursor && PF00149:Calcineurin-like phosphoesterase|PF14008:Iron/zinc purple acid phosphatase-like protein C|PF16656:Purple acid Pho	Metallophos
TraesCS5B03G0529700	TraesCS5B02G199200	61.9421	44.3049	52.7311	149.315	210.895	235.272	52.9927	198.494	-1.90385	5.44e-12	1.75e-09	Chr5B	Q9XIK0.1 RecName: Full=Protein PLASTID REDOX INSENSITIVE 2; Flags: Precursor && -	-
TraesCS5B03G0540200	TraesCS5B02G202700	123.884	117.408	146.82	339.6	182.641	449.397	129.371	323.879	-1.32497	2.25e-06	0.000132517	Chr5B	Q6ERX1.1 RecName: Full=Probable cinnamyl alcohol dehydrogenase 8A; Short=OsCAD8A && PF08240:Alcohol dehydrogenase GroES-like domain|PF00107:Zinc-binding dehydrogenase	ADH_N
TraesCS5B03G0558600	TraesCS5B02G210800	15.748	9.9686	22.7467	80.1201	90.8161	40.5338	16.1544	70.49	-2.11865	4.84e-06	0.000251023	Chr5B	Q8LCQ4.1 RecName: Full=Photosystem I chlorophyll a/b-binding protein 6, chloroplastic; AltName: Full=LHCI type III LHCA6; Flags: Precursor && PF00504:Chlorophyll A-B binding protein	-
TraesCS5B03G0558800	TraesCS5B02G211000	23.0971	14.3991	6.20366	58.2692	12.1088	88.9982	14.5666	53.1254	-1.87094	0.00310847	0.0360501	Chr5B	Q69P94.1 RecName: Full=Protein TIFY 10c; Short=OsTIFY10c; AltName: Full=Jasmonate ZIM domain-containing protein 8; Short=OsJAZ8; AltName: Full=OsJAZ7 && PF09425:Jas motif|PF06200:tify domain	Zim
TraesCS5B03G0561300	TraesCS5B02G212600	49.3437	62.0269	41.3577	122.912	112.006	98.6911	50.9094	111.203	-1.12899	0.000146455	0.00375204	Chr5B	Q9LTV3.1 RecName: Full=Auxin-responsive protein SAUR72; AltName: Full=Protein SMALL AUXIN UP RNA 72 && PF02519:Auxin responsive protein	Auxin_inducible
TraesCS5B03G0575200	TraesCS5B02G218200	0	0	0	6.37319	7.06347	20.2669	0	11.2345	-5.84714	0.00018187	0.00441905	Chr5B	P14897.1 RecName: Full=Low molecular mass early light-inducible protein HV90, chloroplastic; Short=ELIP; Flags: Precursor && PF00504:Chlorophyll A-B binding protein	-
TraesCS5B03G0580500	TraesCS5B02G220400	23.0971	35.4439	21.7128	61.911	66.5984	60.8007	26.7513	63.1034	-1.24088	0.00119851	0.0182271	Chr5B	Q94AN4.1 RecName: Full=AP2-like ethylene-responsive transcription factor At1g16060 && PF00847:AP2 domain	AP2
TraesCS5B03G0592600	TraesCS5B02G225100	6.2992	6.64573	11.3734	37.3287	23.2085	21.1481	8.1061	27.2284	-1.74558	0.00482795	0.048964	Chr5B	O04249.1 RecName: Full=Sugar transport protein 7; AltName: Full=Hexose transporter 7 && PF00083:Sugar (and other) transporter	Sugar_tr
TraesCS5B03G0596800	TraesCS5B02G226500	40.9448	48.7354	51.6971	106.523	92.8342	120.72	47.1258	106.693	-1.18023	7.8e-05	0.00227435	Chr5B	PF07891:Protein of unknown function (DUF1666)	-
TraesCS5B03G0604800	TraesCS5B02G230100	16.7979	25.4753	31.0183	56.4483	69.6256	51.1079	24.4305	59.0606	-1.27156	0.00171225	0.0236396	Chr5B	F4JPK8.1 RecName: Full=AAA-ATPase At4g30250; Flags: Precursor && PF00004:ATPase family associated with various cellular activities (AAA)|PF14363:Domain associated at C-terminal with AAA	AAA
TraesCS5B03G0608500	TraesCS5B02G232200	193.175	256.968	195.415	579.96	471.234	308.41	215.186	453.201	-1.07489	3.69e-06	0.000200651	Chr5B	Q9C9X7.1 RecName: Full=Protein indeterminate-domain 14; Short=AtIDD14; AltName: Full=Transcriptional regulator of starch metabolism IDD14 && -	-
TraesCS5B03G0611200	TraesCS5B02G233500	109.186	59.8116	78.5796	276.779	165.487	116.314	82.5258	186.193	-1.1728	0.000336783	0.00699601	Chr5B	Q6H5X0.1 RecName: Full=Putative ripening-related protein 2; Flags: Precursor && -	-
TraesCS5B03G0611500	TraesCS5B02G233700	8.39893	11.0762	9.30548	25.4928	32.2902	29.9598	9.59355	29.2476	-1.6091	0.00422079	0.0447456	Chr5B	Q6NQB7.1 RecName: Full=Beta-1,3-galactosyltransferase 7 && PF01762:Galactosyltransferase|PF13334:Domain of unknown function (DUF4094)	Galactosyl_T
TraesCS5B03G0624900	TraesCS5B02G239300	1.04987	13.2915	5.16971	38.2391	21.1904	24.6728	6.50368	28.0341	-2.11979	0.00311785	0.0361343	Chr5B	I4DST8.1 RecName: Full=Tuliposide A-converting enzyme 1, chloroplastic; Short=TgTCEA1; Flags: Precursor && PF07859:alpha/beta hydrolase fold	Abhydrolase_3
TraesCS5B03G0627500	TraesCS5B02G240600	77.6901	74.2107	90.987	222.151	219.977	100.453	80.9626	180.86	-1.15757	0.000166153	0.00413367	Chr5B	Q9FX92.1 RecName: Full=Probable carboxylesterase 3; AltName: Full=AtCXE3 && PF07859:alpha/beta hydrolase fold	Abhydrolase_3
TraesCS5B03G0628100	TraesCS5B02G241000	0	0	0	11.8359	6.0544	4.40585	0	7.43206	-5.24818	0.00191185	0.025487	Chr5B	I4DST9.1 RecName: Full=Tuliposide A-converting enzyme 2, chloroplastic; Short=TgTCEA2; Flags: Precursor && PF07859:alpha/beta hydrolase fold	Abhydrolase_3
TraesCS5B03G0634400	TraesCS5B02G244100	0	0	0	8.1941	5.04534	7.93053	0	7.05666	-5.17494	0.00225724	0.0286094	Chr5B	Q6YXH8.2 RecName: Full=Cyclin-D4-1; AltName: Full=G1/S-specific cyclin-D4-1; Short=CycD4;1 && PF02984:Cyclin, C-terminal domain|PF00134:Cyclin, N-terminal domain	Cyclin_C
TraesCS5B03G0640500	TraesCS5B02G246900	29.3963	40.982	8.27154	95.5979	50.4534	66.9689	26.2166	71.0067	-1.44316	0.00249934	0.0308589	Chr5B	Q9SJZ2.1 RecName: Full=Peroxidase 17; Short=Atperox P17; AltName: Full=ATP25a; Flags: Precursor && PF00141:Peroxidase	-
TraesCS5B03G0648300	TraesCS5B02G249900	36.7453	26.5829	28.9504	60.0901	74.671	66.9689	30.7596	67.2433	-1.12641	0.00182869	0.0247138	Chr5B	PF12274:Protein of unknown function (DUF3615)	-
TraesCS5B03G0655000	TraesCS5B02G252100	44.0944	33.2287	53.765	8.1941	15.136	23.7916	43.696	15.7072	1.47434	0.00332258	0.0379152	Chr5B	Q651X6.1 RecName: Full=Cellulose synthase-like protein E6; AltName: Full=OsCslE6 && PF03552:Cellulose synthase	-
TraesCS5B03G0665700	TraesCS5B02G256400	0	2.21524	0	19.1196	31.2811	1.76234	0.738415	17.3877	-4.59471	0.00104166	0.0164792	Chr5B	Q00327.1 RecName: Full=Photosystem I reaction center subunit V, chloroplastic; AltName: Full=PSI-G; AltName: Full=Photosystem I 9 kDa protein; Flags: Precursor && PF01241:Photosystem I psaG / psaK	-
TraesCS5B03G0667300	TraesCS5B02G257000	53.5432	23.2601	38.2559	160.24	270.43	194.739	38.353	208.47	-2.43794	1.94e-14	1.18e-11	Chr5B	P09886.1 RecName: Full=Small heat shock protein, chloroplastic; Flags: Precursor && PF00011:Hsp20/alpha crystallin family	-
TraesCS5B03G0694300	TraesCS5B02G266100	0	0	1.03394	3.64182	10.0907	14.9799	0.344648	9.5708	-4.65159	0.00323723	0.0371703	Chr5B	Q8H3I4.2 RecName: Full=Peroxisomal (S)-2-hydroxy-acid oxidase GLO4; AltName: Full=Glycolate oxidase 4; Short=GOX 4; Short=OsGLO4; AltName: Full=Short chain alpha-hydroxy acid oxidase GLO4 && PF01070:FMN-dependent de	FMN_dh
TraesCS5B03G0711600	TraesCS5B02G273200	12.5984	8.86098	8.27154	76.4783	58.5259	46.702	9.91031	60.5687	-2.61058	5.45e-08	6.03e-06	Chr5B	-	-
TraesCS5B03G0725100	TraesCS5B02G279900	30.4461	33.2287	42.3917	93.7769	82.7435	89.8794	35.3555	88.7999	-1.32815	4.93e-05	0.00158957	Chr5B	Q9SV68.1 RecName: Full=Putative quinone-oxidoreductase homolog, chloroplastic && PF08240:Alcohol dehydrogenase GroES-like domain|PF13602:Zinc-binding dehydrogenase	ADH_N
TraesCS5B03G0744800	TraesCS5B02G287700	44.0944	95.2555	59.9687	23.6718	17.1541	40.5338	66.4395	27.1199	1.28516	0.00334709	0.0380765	Chr5B	Q9S7M9.1 RecName: Full=Transmembrane emp24 domain-containing protein p24beta2; AltName: Full=p24 family protein beta1; Short=p24beta1; AltName: Full=p24 family protein beta2; Short=p24beta2; Flags: Precursor && PF01	-
TraesCS5B03G0765400	TraesCS5B02G299000	0	6.64573	2.06789	4.55228	9.08161	57.2761	2.90454	23.6366	-3.04179	0.00359698	0.0400904	Chr5B	Q2HXL0.2 RecName: Full=Respiratory burst oxidase homolog protein C; AltName: Full=NADPH oxidase RBOHC; AltName: Full=StRBOHC && PF08414:Respiratory burst NADPH oxidase|PF08030:Ferric reductase NAD binding domain|PF0	FAD_binding_8
TraesCS5B03G0798100	TraesCS5B02G315600	127.034	140.668	101.326	373.287	352.164	199.144	123.009	308.199	-1.3251	2.6e-07	2.22e-05	Chr5B	Q6Z9C8.1 RecName: Full=Heat stress transcription factor B-2b; AltName: Full=Heat stress transcription factor 2; Short=rHsf2; AltName: Full=Heat stress transcription factor 21; Short=OsHsf-21 && PF00447:HSF-type DNA-	HSF_DNA-bind
TraesCS5B03G0805100	TraesCS5B02G318200	3.1496	7.75336	12.4073	27.3137	33.2992	31.7221	7.77009	30.7783	-1.98354	0.00123501	0.0186616	Chr5B	O81970.1 RecName: Full=Cytochrome P450 71A9; AltName: Full=Cytochrome P450 CP1 && PF00067:Cytochrome P450	p450
TraesCS5B03G0815100	TraesCS5B02G322900	4.19947	1.10762	3.10183	84.6724	138.242	25.5539	2.80297	82.8228	-4.87159	1.92e-11	5.5e-09	Chr5B	Q10HD0.1 RecName: Full=Chlorophyll a-b binding protein, chloroplastic; AltName: Full=LHCII type I CAB; Short=LHCP; Flags: Precursor >A2XJ35.1 RecName: Full=Chlorophyll a-b binding protein, chloroplastic; AltName: Fu	-
TraesCS5B03G0840200	TraesCS5B02G335800	15.748	13.2915	15.5091	50.9855	49.4443	46.702	14.8495	49.0439	-1.72219	0.000108866	0.00299062	Chr5B	O04375.1 RecName: Full=Serine/threonine protein phosphatase 2A 57 kDa regulatory subunit B' alpha isoform; Short=AtB' alpha; Short=PP2A, B' subunit, alpha isoform && PF01603:Protein phosphatase 2A regulatory B subun	-
TraesCS5B03G0876500	TraesCS5B02G350300	18.8976	25.4753	9.30548	33.6869	58.5259	49.3455	17.8928	47.1861	-1.40203	0.00387677	0.0422705	Chr5B	-	-
TraesCS5B03G0906600	TraesCS5B02G361100	44.0944	32.1211	18.611	90.1351	52.4715	100.453	31.6088	81.02	-1.36117	0.000732341	0.0126254	Chr5B	Q9ZUH3.2 RecName: Full=Probable purine permease 5; Short=AtPUP5 && PF16913:Purine nucleobase transmembrane transport	-
TraesCS5B03G0934000	TraesCS5B02G370500	44.0944	37.6592	16.5431	149.315	84.7617	75.7806	32.7655	103.286	-1.65872	3.61e-05	0.00124764	Chr5B	PF03061:Thioesterase superfamily	4HBT
TraesCS5B03G0934300	TraesCS5B02G370700	1077.16	636.883	889.191	2102.24	2674.03	1937.69	867.746	2237.99	-1.36632	2.72e-13	1.29e-10	Chr5B	P19683.1 RecName: Full=31 kDa ribonucleoprotein, chloroplastic; Flags: Precursor && PF00076:RNA recognition motif. (a.k.a. RRM, RBD, or RNP domain)	RRM_1
TraesCS5B03G0935500	TraesCS5B02G371100	54.593	47.6278	47.5614	132.927	113.016	91.6417	49.9274	112.528	-1.17168	8.01e-05	0.00232584	Chr5B	Q9FHB6.1 RecName: Full=Protein DETOXIFICATION 16; Short=AtDTX16; AltName: Full=Multidrug and toxic compound extrusion protein 16; Short=MATE protein 16 && PF01554:MatE	MatE
TraesCS5B03G0936600	TraesCS5B02G371600	4.19947	0	4.13577	150.225	103.934	15.8611	2.77841	90.0067	-5.00898	6.42e-05	0.0019509	Chr5B	-	-
TraesCS5B03G0953600	TraesCS5B02G381000	51.4435	47.6278	77.5457	88.3142	150.351	119.839	58.8723	119.501	-1.01815	0.00128457	0.0192395	Chr5B	Q9LFF1.1 RecName: Full=Pentatricopeptide repeat-containing protein At3g53700, chloroplastic; AltName: Full=Protein MATERNAL EFFECT EMBRYO ARREST 40; Flags: Precursor && PF12854:PPR repeat|PF13041:PPR repeat family	-
TraesCS5B03G0955400	TraesCS5B02G381400	0	0	0	11.8359	14.1269	7.93053	0	11.2978	-5.85006	0.000125084	0.00333037	Chr5B	Q9SJG6.1 RecName: Full=Pentatricopeptide repeat-containing protein At2g42920, chloroplastic; Flags: Precursor && -	-
TraesCS5B03G0961700	TraesCS5B02G384500	12.5984	2.21524	3.10183	6.37319	13.1179	87.2358	5.97182	35.5756	-2.57399	0.00349715	0.0392584	Chr5B	Q75KV9.1 RecName: Full=Transcription factor BHLH148; AltName: Full=Basic helix-loop-helix protein 148; Short=OsbHLH148; AltName: Full=bHLH transcription factor bHLH148 && PF00010:Helix-loop-helix DNA-binding domain	HLH
TraesCS5B03G0962300	TraesCS5B02G384800	0	0	0	5.46273	8.07254	5.28702	0	6.2741	-5.0015	0.00417626	0.0444097	Chr5B	A6YIH8.1 RecName: Full=Premnaspirodiene oxygenase; Short=HPO; AltName: Full=Cytochrome P450 71D55 && PF00067:Cytochrome P450	p450
TraesCS5B03G0962600	TraesCS5B02G384900	0	0	0	14.5673	6.0544	3.52468	0	8.04879	-5.36326	0.00143204	0.0207703	Chr5B	A6YIH8.1 RecName: Full=Premnaspirodiene oxygenase; Short=HPO; AltName: Full=Cytochrome P450 71D55 && PF00067:Cytochrome P450	p450
TraesCS5B03G0976400	TraesCS5B02G391300	20.9973	8.86098	17.577	60.0901	62.5622	48.4644	15.8118	57.0389	-1.8452	3.99e-05	0.00135306	Chr5B	Q9ZVZ9.1 RecName: Full=Photosystem II D1 precursor processing protein PSB27-H2, chloroplastic; Short=Psb27-H2; AltName: Full=LOW PSII accumulation 19 protein; Short=LPA19; AltName: Full=Thylakoid lumenal protein PSB	-
TraesCS5B03G0984200	TraesCS5B02G395800	108.136	121.838	191.279	323.212	318.865	236.154	140.418	292.744	-1.05833	1.65e-05	0.000667197	Chr5B	O23482.3 RecName: Full=Oligopeptide transporter 3; Short=AtOPT3 && PF03169:OPT oligopeptide transporter protein	OPT
TraesCS5B03G0985100	TraesCS5B02G396100	86.089	37.6592	57.9008	186.643	152.369	73.1371	60.5497	137.383	-1.17952	0.00150636	0.0215522	Chr5B	A2XT03.1 RecName: Full=Protein PYRICULARIA ORYZAE RESISTANCE 21; Short=Pi21 && -	-
TraesCS5B03G0986000	TraesCS5B02G396600	128.084	69.7802	173.702	51.896	44.399	73.1371	123.855	56.4774	1.13165	0.00129263	0.0192982	Chr5B	Q10CQ1.2 RecName: Full=MADS-box transcription factor 14; AltName: Full=FDRMADS6; AltName: Full=OsMADS14; AltName: Full=Protein AGAMOUS-like 10; AltName: Full=Protein APETALA1-like B; AltName: Full=RMADS211 && PF0148	K-box
TraesCS5B03G0998600	TraesCS5B02G402900	46.1941	28.7982	44.4595	100.15	96.8705	81.9488	39.8173	92.9898	-1.22061	0.000189274	0.00454668	Chr5B	P93147.2 RecName: Full=Isoflavone 2'-hydroxylase; AltName: Full=CYP GE-3; AltName: Full=Cytochrome P450 81E1; AltName: Full=Cytochrome P450 91A4 && PF00067:Cytochrome P450	p450
TraesCS5B03G1008000	TraesCS5B02G408100	9.4488	15.5067	10.3394	34.5973	46.4171	23.7916	11.765	34.9353	-1.57038	0.00377663	0.0415073	Chr5B	Q7Y0D4.1 RecName: Full=Thioredoxin-like protein HCF164, chloroplastic; AltName: Full=Protein HIGH CHLOROPHYLL FLUORESCENCE 164; Flags: Precursor && PF00085:Thioredoxin	-
TraesCS5B03G1010400	TraesCS5B02G409400	240.419	168.359	207.822	466.153	559.023	386.834	205.534	470.67	-1.19369	4e-09	6.21e-07	Chr5B	Q9XJ27.1 RecName: Full=30S ribosomal protein S9, chloroplastic; Flags: Precursor && PF00380:Ribosomal protein S9/S16	-
TraesCS5B03G1028600	TraesCS5B02G417400	7.34906	4.43049	19.6449	79.2097	139.251	29.9598	10.4748	82.8069	-2.97289	3.28e-07	2.7e-05	Chr5B	P13192.2 RecName: Full=Photosystem I reaction center subunit III, chloroplastic; AltName: Full=Light-harvesting complex I 17 kDa protein; AltName: Full=PSI-F; Flags: Precursor && PF02507:Photosystem I reaction centr	-
TraesCS5B03G1047400	TraesCS5B02G423800	14.6981	29.9058	40.3238	110.165	66.5984	61.6819	28.3092	79.4818	-1.48941	0.000373237	0.00756839	Chr5B	PF13450:NAD(P)-binding Rossmann-like domain|PF01593:Flavin containing amine oxidoreductase	Amino_oxidase
TraesCS5B03G1052300	TraesCS5B02G426500	40.9448	16.6143	23.7807	81.0306	163.469	40.5338	27.1133	95.0111	-1.80418	0.000172543	0.00424519	Chr5B	Q10CE4.1 RecName: Full=Peroxisomal (S)-2-hydroxy-acid oxidase GLO1; AltName: Full=Glycolate oxidase 1; Short=GOX 1; Short=OsGLO1; AltName: Full=Short chain alpha-hydroxy acid oxidase GLO1 >B8AKX6.1 RecName: Full=Per	FMN_dh
TraesCS5B03G1060400	TraesCS5B02G431000	98.6874	64.2421	48.5953	175.718	153.378	149.799	70.5083	159.632	-1.17898	4.08e-05	0.00137388	Chr5B	Q8LFN2.1 RecName: Full=Probable inactive leucine-rich repeat receptor-like protein kinase At3g03770; Flags: Precursor && PF13855:Leucine rich repeat|PF07714:Protein tyrosine and serine/threonine kinase	Pkinase_Tyr
TraesCS5B03G1083200	TraesCS5B02G440400	191.076	150.637	192.313	61.0005	106.961	86.3547	178.009	84.7721	1.07353	5.04e-05	0.00161364	Chr5B	Q9SQZ9.2 RecName: Full=PITH domain-containing protein At3g04780 && PF06201:PITH domain	-
TraesCS5B03G1139900	TraesCS5B02G465000	35.6955	55.3811	32.0522	86.4933	162.46	102.216	41.0429	117.056	-1.51267	1.47e-05	0.000610758	Chr5B	Q8W496.1 RecName: Full=Protochlorophyllide-dependent translocon component 52, chloroplastic; AltName: Full=ACD1-like protein; AltName: Full=Protein TIC 55-IV; AltName: Full=Translocon at the inner envelope membrane	-
TraesCS5B03G1143000	TraesCS5B02G466700	55.6429	23.2601	35.1541	192.106	335.01	131.294	38.019	219.47	-2.52513	4.94e-12	1.61e-09	Chr5B	P36213.1 RecName: Full=Photosystem I reaction center subunit II, chloroplastic; AltName: Full=Photosystem I 20 kDa subunit; Short=PSI-D; Flags: Precursor && PF02531:PsaD	-
TraesCS5B03G1149900	TraesCS5B02G470100	13.6483	15.5067	28.9504	89.2247	58.5259	106.622	19.3685	84.7907	-2.12902	3.41e-07	2.8e-05	Chr5B	Q8H6G8.1 RecName: Full=Probable inorganic phosphate transporter 1-8; Short=OsPT8; Short=OsPht1;8; AltName: Full=H(+)/Pi cotransporter && PF00083:Sugar (and other) transporter	Sugar_tr
TraesCS5B03G1153500	TraesCS5B02G471700	103.937	80.8564	41.3577	175.718	231.076	112.79	75.3836	173.195	-1.19938	0.000406717	0.00808276	Chr5B	Q9SGH4.1 RecName: Full=Photosynthetic NDH subunit of lumenal location 3, chloroplastic; AltName: Full=PsbQ-like protein 2; Flags: Precursor && PF05757:Oxygen evolving enhancer protein 3 (PsbQ)	-
TraesCS5B03G1160100	TraesCS5B02G474600	4.19947	7.75336	9.30548	25.4928	26.2357	35.2468	7.0861	28.9918	-2.03385	0.000964635	0.0155355	Chr5B	Q66PF2.1 RecName: Full=Putative UDP-rhamnose:rhamnosyltransferase 1; Short=FaRT1; AltName: Full=Glycosyltransferase 4; Short=FaGT4 && PF00201:UDP-glucoronosyl and UDP-glucosyl transferase	UDPGT
TraesCS5B03G1167000	TraesCS5B02G478000	77.6901	46.5201	55.8329	164.792	118.061	80.1865	60.0144	121.013	-1.01027	0.00239907	0.0298686	Chr5B	O80674.1 RecName: Full=Transcription factor bHLH106; AltName: Full=Basic helix-loop-helix protein 106; Short=AtbHLH106; Short=bHLH 106; AltName: Full=Transcription factor EN 56; AltName: Full=bHLH transcription fact	HLH
TraesCS5B03G1189000	TraesCS5B02G488900	67.1914	29.9058	46.5274	149.315	147.324	71.3748	47.8749	122.671	-1.35405	0.000238665	0.0054319	Chr5B	Q8S3X0.1 RecName: Full=Chalcone--flavonone isomerase; Short=Chalcone isomerase && PF02431:Chalcone-flavanone isomerase	-
TraesCS5B03G1189100	TraesCS5B02G489000	50.3936	85.2869	85.8172	26.4032	31.2811	43.1773	73.8326	33.6205	1.13248	0.00262301	0.0318447	Chr5B	PF14309:Domain of unknown function (DUF4378)	-
TraesCS5B03G1195600	TraesCS5B02G492600	27.2965	29.9058	29.9843	53.7169	63.5712	63.4442	29.0622	60.2441	-1.0515	0.0043655	0.0457718	Chr5B	Q9LZ56.1 RecName: Full=Dof zinc finger protein DOF5.1; Short=AtDOF5.1 && PF02701:Dof domain, zinc finger	zf-Dof
TraesCS5B03G1204900	TraesCS5B02G496000	81.8896	31.0134	93.0548	326.854	453.071	229.104	68.6526	336.343	-2.28855	2.57e-12	8.86e-10	Chr5B	P13194.2 RecName: Full=Photosystem I reaction center subunit IV, chloroplastic; Short=PSI-E; AltName: Full=Photosystem I 10.8 kDa polypeptide; Flags: Precursor && PF02427:Photosystem I reaction centre subunit IV / P	-
TraesCS5B03G1205000	TraesCS5B02G496100	9.4488	21.0448	9.30548	36.4182	38.3446	35.2468	13.2664	36.6699	-1.47263	0.00479479	0.0487625	Chr5B	Q0WQW5.2 RecName: Full=Pentatricopeptide repeat-containing protein At1g59720, chloroplastic/mitochondrial; AltName: Full=Protein CHLORORESPIRATORY REDUCTION 28; Flags: Precursor && PF13041:PPR repeat family|PF14432:	-
TraesCS5B03G1213000	TraesCS5B02G500100	163.779	169.466	137.514	274.958	370.328	361.28	156.92	335.522	-1.0966	7.82e-08	8.08e-06	Chr5B	Q9S7Q2.1 RecName: Full=Pentatricopeptide repeat-containing protein At1g74850, chloroplastic; AltName: Full=Protein PLASTID TRANSCRIPTIONALLY ACTIVE 2; Flags: Precursor && PF13041:PPR repeat family|PF17177:Pentacotri	-
TraesCS5B03G1230500	TraesCS5B02G507300	59.8424	43.1973	75.4778	150.225	143.288	144.512	59.5058	146.008	-1.29243	3.43e-06	0.000188846	Chr5B	O31581.1 RecName: Full=AB hydrolase superfamily protein YfhM && PF00561:alpha/beta hydrolase fold	Abhydrolase_1
TraesCS5B03G1255000	TraesCS5B02G516600	55.6429	38.7668	42.3917	125.643	197.777	94.2852	45.6005	139.235	-1.60707	1.46e-06	9.28e-05	Chr5B	Q0JG75.2 RecName: Full=Photosystem II reaction center PSB28 protein, chloroplastic; AltName: Full=Photosystem II protein W-like; Flags: Precursor && PF03912:Psb28 protein	-
TraesCS5B03G1291400	TraesCS5B02G531900	564.828	407.605	414.611	966.904	1152.35	775.43	462.348	964.896	-1.06068	1.26e-08	1.68e-06	Chr5B	P82403.2 RecName: Full=30S ribosomal protein S6 alpha, chloroplastic; Contains: RecName: Full=30S ribosomal protein S6 beta, chloroplastic; Contains: RecName: Full=30S ribosomal protein S6 gamma, chloroplastic; Cont	-
TraesCS5B03G1311500	TraesCS5B02G550400	80.8397	119.623	74.4439	41.881	53.4806	37.0091	91.6356	44.1236	1.0562	0.00154801	0.0219724	Chr5B	F4JUL9.1 RecName: Full=Actin-related protein 2/3 complex subunit 4; AltName: Full=Actin-related protein C4; AltName: Full=Arp2/3 complex 20 kDa subunit; Short=p20-ARC && PF05856:ARP2/3 complex 20 kDa subunit (ARPC4)	-
TraesCS5B03G1315100	TraesCS5B02G552300	0	0	0	25.4928	2.01813	12.3364	0	13.2824	-6.08902	0.000116792	0.00316169	Chr5B	P53860.1 RecName: Full=Phosphatidylinositol transfer protein PDR16; Short=PITP; AltName: Full=Pleiotropic drug resistance protein 16; AltName: Full=SEC14 homolog 3 && PF00650:CRAL/TRIO domain	-
[truncated: 696 more rows]
