# Supplementary material for: Impact of “Green Revolution” gene Rht-B1b on coleoptile length of wheat
Source: Front Plant Sci. 2023 Mar 2;14:1147019. doi: 10.3389/fpls.2023.1147019 (PMC10017974; doi:10.3389/fpls.2023.1147019)
Supplement: Supplementary file 4 [file Table_4.xlsx]

## Sheet: CL_QTL
Table S4 Quantitative trait loci for wheat coleoptie length (CL)
QTL name	Labeled name	Associated Markers	Chromoome	Position	References
QClp.ipk-1A	QClp.ipk-1A	Xksue18D	1A	23574334	[1]
	QCL_IWA1583	wsnp_Ex_c12117_19381493	1A	52076015	[2]
Lcol-A1	Lcol-A1	IWB58229,IWA710	1A	63690416	[3]
	QCL_IWA3399	wsnp_Ex_c3253_5995011	1A	65066964	[2]
QClc.ipk-1A	QClc.ipk-1A	Xabc156c	1A	323142255	[1]
QCL-1A	QCL-1A	wPt-731282,Xwmc120	1A	430818994	[4]
QCL.WY.1A	QCL.WY.1A	Xwes226.2	1A	596480982	[5]
QCLR-WY-1BL	QCLR-WY-1BL	wPt-7094	1B	3347488	[6]
QCL.daw.1B-1	QCL.daw.1B-1	IWB26466(Excalibur_c43567_850)	1B	8526583	[7]
QCL.daw.1B-2	QCL.daw.1B-2	IWB74039(Tdurum_contig98378_452)	1B	48668965	[7]
QClc.ipk-1B.1	QClc.ipk-1B.1	Xcdo1173	1B	100170885	[1]
	QL_WMC419	WMC419	1B	200865580	[8]
	QCL_IWA1757	wsnp_Ex_c13310_20984763	1B	496024691	[2]
QClc.ipk-1B.2	QClc.ipk-1B.2	Xbcd1150a	1B	562326434	[1]
	QCL_IWA724	wsnp_CAP11_c2596_1325540	1B	683049068	[2]
QCLR-WJ-1DL	QCLR-WJ-1DL	Xbarc229.1,Glu-d1	1D	238059278	[6]
	QCL_IWA4777	wsnp_Ex_c8188_13842273	1D	412735680	[2]
QCl2A	QCl2A	Xbarc212,Xgwm636	2A	4272019	[9]
QCL.WY.2B	QCL.WY.2B	Xgwm547	2B	42259810	[5]
	QCL_wPt-0615	wPt-0615	2B	99768626	[10]
	QCL_IWA3278	wsnp_Ex_c30447_39360584	2B	140903217	[2]
	QCL_wmc474	wmc474	2B	180791693	[10]
	QCL_IWA1937	wsnp_Ex_c14760_22866930	2B	344734337	[2]
	QCL_IWA7672	wsnp_Ra_c17636_26538543	2D	81012872	[2]
	QCL_gwm515c	gwm515c	2D	122368279	[10]
	QCL_wmc18	wmc18	2D	133141169	[10]
	QCL_IWA1072	wsnp_CAP7_c2782_1329707	2D	482559378	[2]
	QCL_IWA5067	wsnp_Ex_rep_c102478_87635370	3A	63459872	[2]
	QL_Xbarc71,Xbarc284	Xbarc71,Xbarc284	3A	147559968	[11]
	QL_Xbarc71	Xbarc71	3A	230906498	[11]
	QCL_IWA6997	wsnp_Ku_c38911_47455924	3A	634128489	[2]
QCl3A	QCl3A	Xgwm155,Xbarc51	3A	710289989	[9]
	QCL_wPt-8855	wPt-8855	3B	6296887	[10]
qCL.3B.2	qCL.3B.2	gpw7774,gwm389	3B	11459984	[12]
qCL.3B.1	qCL.3B.1	cfp56,gpw7774	3B	22585757	[12]
	QL_Xbarc164,Xgwm566	Xbarc164,Xgwm566	3B	345301370	[11]
QCL-3B	QCL-3B	Xmag3356,wPt-1336	3B	377754477	[4]
QCL.WL.3B.2	QCL.WL.3B.2	Xmag3356	3B	664475582	[5]
QCL.WL.3B.1	QCL.WL.3B.1	Xwmc236,Xbarc101	3B	732235223	[5]
	QCL_abg75c	abg75c	3B	756558629	[10]
	QL_WMC56,GWM299	WMC56,GWM299	3B	768706057	[8]
qCL.3B.3	qCL.3B.3	cfb3059,cfb3375	3B	785411398	[12]
	QL_Xgwm247	Xgwm247	3B	847645771	[11]
QCLT|CLC-3D	QCLT|CLC-3D	wPt-666676,wPt-5313	3D	308799627	[4]
	QL_Xgwm645,Xbarc303	Xgwm645,Xbarc303	3D	517483662	[11]
QCL.xjau-3DL	QCL.xjau-3DL	AX-108822255,AX-111478282	3D	543817606	[13]
QCL-4A.1	QCL-4A.1	Xcft3034.2	4A	10000000	[4]
	QCL_gwm165	gwm165	4A	51131312	[10]
	QL_Xgwm165,Xwmc89	Xgwm165,Xwmc89	4A	283054092	[11]
QCL.WY.4A1	QCL.WY.4A1	Xwmc420.2,Xcfe89.4	4A	359350302	[5]
	QCL_IWA1792	wsnp_Ex_c13615_21393511	4A	569235759	[2]
	QCL_gwm637	gwm637	4A	616277668	[10]
QCL-4A.2	QCL-4A.2	wPt-2084,wPt-1362	4A	726074393	[4]
	QL_Xgwm540,Rht-B1	Xgwm540,Rht-B1	4B	21000456	[11]
QCL.daw.4B	QCL.daw.4B	IWB70672(Tdurum_contig41902_1524)	4B	27310477	[7]
	QL_barc193	barc193	4B	27696989	[8]
qCL.4B.1	qCL.4B.1	gwm368,wmc125	4B	32603629	[12]
Rht-B1b	Rht-B1b	Rht1	4B	33614549	[14]
	QCL_Rht-B1b	Rht1	4B	33614549	[10]
qScl-4B	qScl-4B	AX-110376140,AX-110455326	4B	38047394	[15]
	QCL_IWA1846	wsnp_Ex_c14026_21924297	4B	40762943	[2]
	QL_WMC617,barc199	WMC617,barc199	4B	99599225	[8]
Q.Cl.ui-4B	Q.Cl.ui-4B	Rht-B1,Xbarc125b	4B	143457145	[16]
QCl.iari_4B	QCl.iari_4B	AX-94496390,AX-94957045	4B	165604684	[17]
QCl4B	QCl4B	Xwmc657,Xwmc48	4B	307130153	[9]
	QCL_XksuC2	XksuC2	4B	608384282	[18]
	QCL_Rht-D1b	Rht2	4D	19189660	[10]
	QL_Rht2	Rht2	4D	19189660	[2]
	QL_Rht-D1	Rht-D1	4D	19189660	[19]
	QCL_IWA4580	wsnp_Ex_c683_1341113	4D	54941751	[2]
	QL_Xbarc288,Rht-D1	Xbarc288,Rht-D1	4D	70300926	[11]
QClp.ipk-4D	QClp.ipk-4D	Xgdm129	4D	89787472	[20]
QCl4D	QCl4D	Xwmc473,Xwmc331	4D	340463786	[9]
qScl-4D	qScl-4D	AX-110289945,AX-109001644	4D	399163882	[15]
	QL_Xgwm194	Xgwm194	4D	505978160	[19]
QCL.xjau-5AS	QCL.xjau-5AS	AX-94458300,AX-111258240	5A	19854475	[13]
QCl-5A	QCl-5A	Xcwm216,wPt-0605	5A	450493354	[4]
	QCL_psr426	psr426	5A	594464793	[10]
QCL.WL.5B	QCL.WL.5B	Xgwm234.3,Xgwm544.2	5B	43666922	[5]
	QCL_IWA2609	wsnp_Ex_c214_421541	5B	44052464	[2]
QCl-5B	QCl-5B	wPt-5175,wPt-8449	5B	368256204	[4]
	QCL_IWA7227	wsnp_Ku_c6464_11320381	5B	405812640	[2]
	QCL_IWA6468	wsnp_Ku_c12562_20256747	5B	480666872	[2]
	QL_Xgwm497,Xbarc156	Xgwm497,Xbarc156	5B	686436596	[11]
QCl.iari_5D	QCl.iari_5D	Xwmc318,AX-95248961	5D	119469858	[17]
	QCL_psr326b	psr326b	5D	183126641	[10]
QCL.WY.5D.2	QCL.WY.5D.2	Xcfd266.2,Xcfd29	5D	260358138	[5]
QCL.WY.5D.1	QCL.WY.5D.1	Xwmc765,Xcfd266.2	5D	294125502	[5]
	QCL_abg3a	abg3a	5D	456877617	[10]
	QCL_IWA7177	wsnp_Ku_c55961_59662821	5D	544280762	[2]
	QL_GWM459,GWM356	GWM459,GWM356	6A	238764716	[8]
QHt.ucw-6AS(Rht25)	QHt.ucw-6AS(Rht25)	IWB41674,IWA7323	6A	261795689	[14]
	QCL_IWA8306	wsnp_RFL_Contig2182_1514692	6A	499136881	[2]
	QCL_IWA5718	wsnp_Ex_rep_c70951_69806211	6A	571898207	[2]
QCL-6B	QCL-6B	wPt-664250,wPt-666793	6B	33188106	[4]
QCL.WY.6B	QCL.WY.6B	Xwmc737,Xcwm29.1	6B	104110303	[5]
Q.Cl.ui-6B	Q.Cl.ui-6B	X377995	6B	374927756	[16]
qCL.6B.1	qCL.6B.1	BARC354,barc79	6B	583693254	[12]
	QCL_barc178	barc178	6B	672931261	[10]
	QCL_gwm219	gwm219	6B	683747564	[10]
	QCL_IWA5709	wsnp_Ex_rep_c70767_69655253	6B	702157517	[2]
	QCL_IWA3850	wsnp_Ex_c43009_49439922	7A	1734435	[2]
QCL-7A	QCL-7A	wPt-6668,Xmag2931.3	7A	19771211	[4]
	QCL_IWA3831	wsnp_Ex_c42653_49180485	7A	87253626	[2]
	QCL_IWA4437	wsnp_Ex_c61603_61581218	7A	705856911	[2]
	QCL_KsuH9c	KsuH9c	7A	734039244	[10]
	QCL_wmc76	wmc76	7B	45735100	[10]
QCl7B1	QCl7B1	Xbarc72	7B	227767741	[9]
	QCL_wPt-6463	wPt-6463	7B	511267471	[10]
QCLR-WL-7B	QCLR-WL-7B	wpt-0408	7B	566330892	[6]
QCL-7B.1	QCL-7B.1	Xwmc517.2,wPt-3833	7B	626162748	[4]
QCL-7B.2	QCL-7B.2	wPt-7108,wPt-9925	7B	702290588	[4]
	QCL_IWA3387	wsnp_Ex_c323_629581	7B	713431941	[2]
QCLT|CLC-7D	QCLT|CLC-7D	wPt-0934,wPt-1405	7D	328555986	[4]
References
[1] Landjeva S L I O, Neumann K L I O, Lohwasser U L I O, Boerner A L I O, Molecular mapping of genomic regions associated with wheat seedling growth under osmotic stress, Biol. Plantarum, 52 (2008) 259-266.
[2] Rebetzke G J, Verbyla A P, Verbyla K L, Morell M K, Cavanagh C R, Use of a large multiparent wheat mapping population in genomic dissection of coleoptile and seedling growth, Plant Biotechnol. J., 12 (2014) 219-230.
[3] Bovill W D, Hyles J, Zwart A B, Ford B A, Perera G, Phongkham T, Brooks B J, Rebetzke G J, Hayden M J, Hunt J R, Spielmeyer W, Increase in coleoptile length and establishment by Lcol-A1, a genetic locus with major effect in wheat, BMC Plant Biol., 19 (2019) 332.
[4] Zhang H, Cui F, Wang H, Detection of quantitative trait loci (QTLs) for seedling traits and drought tolerance in wheat using three related recombinant inbred line (RIL) populations, Euphytica, 196 (2014) 313-330.
[5] Zhang H, Cui F, Wang L, Li J, Ding A, Zhao C, Bao Y, Yang Q, Wang H, Conditional and unconditional QTL mapping of drought-tolerance-related traits of wheat seedling using two related RIL populations, J. Genet., 92 (2013) 213-231.
[6] Liu X, Zhang H, Hu X, Wang H, Gao J, Liang S, Feng J, QTL mapping for drought-tolerance coefficient of seedling related traits during wheat germination, Journal of Nuclear Agricultural Sciences, 2 (2017) 209-217.
[7] Francki M G, Stainer G S, Walker E, Rebetzke G J, Stefanova K T, French R J, Phenotypic evaluation and genetic analysis of seedling emergence in a global collection of wheat genotypes (Triticum aestivum l.) under limited water availability, Front. Plant Sci., 12 (2021) 796176.
[8] Nagel M, Navakode S, Scheibal V, Baum M, Nachit M, Röder M S, Börner A, The genetic basis of durum wheat germination and seedling growth under osmotic stress, Biol. Plantarum, 58 (2014) 681-688.
[9] Li Z, Yuan Q, Shi C, Chen J, Han S, Tian J, QTL mapping for coleoptile length and root length in wheat seedling, Molecular Plant Breeding, 8 (2010) 460-468.
[10] Rebetzke G J, Ellis M H, Bonnett D G, Richards R A, Molecular mapping of genes for Coleoptile growth in bread wheat (Triticum aestivum L.), Theor. Appl. Genet., 114 (2007) 1173-1183.
[11] Elbudony K A M, Genes controlling coleoptile length and seedling emergence in wheat and their role in plant height (2017).
[12] Singh K, Shukla S, Kadam S, Semwal V K, Singh N K, Khanna-Chopra R, Genomic regions and underlying candidate genes associated with coleoptile length under deep sowing conditions in a wheat RIL population, J. Plant Biochem. Biot., 24 (2015) 324-330.
[13] Ren Y, Liu J, Zhang J, Dreisigacker S, Xia X, Geng H, QTL mapping of drought tolerance at germination stage in wheat using the 50 K SNP array, Plant Genetic Resources: Characterization and Utilization, 19 (2021) 453-460.
[14] Mo Y, Vanzetti L S, Hale I, Spagnolo E J, Guidobaldi F, Al-Oboudi J, Odle N, Pearce S, Helguera M, Dubcovsky J, Identification and characterization of Rht25, a locus on chromosome arm 6AS affecting wheat plant height, heading time, and spike development, Theor. Appl. Genet., 131 (2018) 2021-2035.
[15] Zhang N, Pan R Q, Liu J J, Zhang X L, Su Q N, Cui F, Zhao C H, Song L Q, Ji J, Li J M, QTL for sensitivity of seedling height to exogenous GA3 and their effects on adult plant height in common wheat, Cereal Res. Commun., 46 (2018) 412-423.
[16] Li P, Chen J, Wu P, Zhang J, Chu C, See D, Brown-Guedira G, Zemetra R, Souza E, Quantitative trait loci analysis for the effect of Rht-B1 dwarfing gene on coleoptile length and seedling root length and number of bread wheat, Crop Sci., 51 (2011) 2561-2568.
[17] Puttamadanayaka S, Harikrishna, Balaramaiah M, Biradar S, Parmeshwarappa S V, Sinha N, Prasad S, Mishra P C, Jain N, Singh P K, Singh G P, Prabhu K V, Mapping genomic regions of moisture deficit stress tolerance using backcross inbred lines in wheat (Triticum aestivum L.), Sci Rep, 10 (2020) 21646.
[18] Rebetzke G J, Appels R, Morrison A D, Richards R A, Mcdonald G, Ellis M H, Spielmeyer W, Bonnett D G, Quantitative trait loci on chromosome 4B for coleoptile length and early vigour in wheat (Triticum aestivum L.), Australian Journal of Agricultural Research, 52 (2001) 1221-1234.
[19] Yu J B, Bai G H, Mapping quantitative trait loci for long coleoptile in chinese wheat landrace wangshuibai, Crop Sci., 50 (2010) 43-50.
[20] Landjeva S, Lohwasser U, Börner A, Genetic mapping within the wheat D genome reveals QTL for germination, seed vigour and longevity, and early seedling growth, Euphytica, 171 (2010) 129-143.
