# Supplementary material for: Impact of “Green Revolution” gene Rht-B1b on coleoptile length of wheat
Source: Front Plant Sci. 2023 Mar 2;14:1147019. doi: 10.3389/fpls.2023.1147019 (PMC10017974; doi:10.3389/fpls.2023.1147019)
Supplement: Supplementary file 5 [file Table_5.xlsx]

## Sheet: CL_GWAS
Table S5 GWAS loci for wheat coleoptie length (CL)
QTL name	Associated Markers	Chromosome	IWGSC RefSeq V2.1_Position /bp	PVE%	References
QCL.sdsu-2AS	D_F1BEJMU02JILPD_53	2A	18679724	5	[1]
QCl.sicau-2A	B32929	2A	782509987	4.17	[2]
QCL.sdsu-2BS	BS00067280_51	2B	2308995	4.1	[1]
QCl.sicau-2B.1	A30893	2B	44931687	4.93	[2]
QCl.sicau-2B.2	A30968	2B	562913291	4.96	[2]
QCL.sdsu-2DS	D_contig17313_245	2D	9513012	4.15	[1]
QCL.stars-2DS1	IWA1799	2D	150213337	1.78	[3]
QCL.stars-2DC1	IWA8304	2D	172750239	2.34	[3]
QCl.sicau-2D	SNP6484	2D	640158490	2.82	[2]
QCl.sicau-3A.1	A48978	3A	415760839	5.2	[2]
QCl.sicau-3A.2	SNP6979	3A	700262726	2.9	[2]
QCL.sdsu-3BS	Tdurum_contig43252_1407	3B	29497358	5.03	[1]
QCl.sicau-3B.1	B10892	3B	770455888	3.19	[2]
QCl.sicau-3B.2	SNP8294	3B	786093290	3.31	[2]
QCl.sicau-3B.3	A11280	3B	832516963	4.8	[2]
Rht1	Rht1	4B	33614549	7.88	[3]
QCL.sdsu-4BS	IAAV971	4B	43533149	10.56	[1]
QCL.stars-4BS2	IWA3798	4B	59050790	1.66	[3]
QCL.stars-4BS1	IWA8564	4B	183053258	3.11	[3]
QCL.sdsu-4BL	RAC875_rep_c82932_407	4B	666200079	3.93	[1]
Rht2	Rht2	4D	19189660	4.16	[3]
QCL.stars-4DC1	IWA5381	4D	62948616	3.18	[3]
QCl.sicau-4D.1	A13215	4D	319267096	4.92	[2]
QCl.sicau-4D.2	A39373	4D	498976527	5.24	[2]
QCl.sicau-5A	SNP11051	5A	566547977	2.75	[2]
QCL.sdsu-5BL	Tdurum_contig67535_391	5B	539491610	5.26	[1]
QCL.stars-5BL1	IWA4903	5B	704782682	1.43	[3]
QCl.sicau-6B.1	A48008	6B	174757551	3.32	[2]
QCl.sicau-6B.2	B18505	6B	516382553	7.67	[2]
QCl.sicau-6B.3	SNP14819	6B	636225859	5.07	[2]
QCL.sdsu-6B	BS00065357_51	6B	714967891	4.19	[1]
QCl.sicau-7A	A19567	7A	540824427	4.77	[2]
QCl.sicau-7D	A888	7D	24479364	2.9	[2]
References
[1] Sidhu J S, Singh D, Gill H S, Brar N K, Qiu Y, Halder J, Al Tameemi R, Turnipseed B, Sehgal S K, Genome-Wide association study uncovers novel genomic regions associated with coleoptile length in hard winter wheat, Frontiers in Genetics, 10 (2020) 1345.
[2] Ma J, Lin Y, Tang S, Duan S, Wang Q, Wu F, Li C, Jiang X, Zhou K, Liu Y, A Genome-Wide association study of coleoptile length in different chinese wheat landraces, Front. Plant Sci., 11 (2020) 677.
[3] Li G, Bai G, Carver B F, Elliott N C, Bennett R S, Wu Y, Hunger R, Bonman J M, Xu X, Genome-wide association study reveals genetic architecture of coleoptile length in wheat, Theor. Appl. Genet., 130 (2016) 391-401.
